# Supplementary material for: In Silico Analysis of Glucose Oxidase from Aspergillus niger: Potential Cysteine Mutation Sites for Enhancing Protein Stability
Source: Bioengineering (Basel). 2021 Nov 19;8(11):188. doi: 10.3390/bioengineering8110188 (PMC8615187; doi:10.3390/bioengineering8110188)
Supplement: Supplementary file 1 [file bioengineering-08-00188-s001.zip]

Archive with 4 entries (4 files):
- Supplementary File S1.xlsx
- Supplementary File S2.xlsx
- Supplementary File S3.pdf
- Supplementary Video S1.mp4
