# Supplementary material for: In Silico Analysis of Glucose Oxidase from Aspergillus niger: Potential Cysteine Mutation Sites for Enhancing Protein Stability
Source: Bioengineering (Basel). 2021 Nov 19;8(11):188. doi: 10.3390/bioengineering8110188 (PMC8615187; doi:10.3390/bioengineering8110188)
Supplement: Supplementary file 1 [file bioengineering-08-00188-s001.zip › Supplementary File S1.xlsx]

## Sheet: Disulfide Bond Profile
PDB FILE	1st residue	2nd residue	chain	CA-CA distance	CB-CB distance	SS distance (measured)	SS distance (reported)	Alpha1	Alpha2
1z8gFH_A.pdb	77	140	A	5.917	3.76	2.03	2.03	103.426	103.997
1z8gFH_A.pdb	90	150	A	5.537	3.752	2.031	2.03	104.061	104.625
1z8gFH_A.pdb	119	138	A	5.795	3.669	2.027	2.03	103.274	103.587
1z8gFH_A.pdb	153	277	A	5.025	4.013	2.038	2.04	104.14	104.754
1z8gFH_A.pdb	188	204	A	6.26	3.808	2.031	2.03	101.354	102.903
1z8gFH_A.pdb	291	359	A	4.621	4.011	2.035	2.04	105.064	104.84
1z8gFH_A.pdb	322	338	A	6.506	3.749	2.03	2.03	105.161	102.518
1z8gFH_A.pdb	349	381	A	5.465	3.821	2.034	2.03	104.074	103.216
3bx4FH_A.pdb	33	131	A	5.58	3.866	2.044	2.04	107.662	106.491
3bx4FH_A.pdb	106	123	A	5.34	4.077	2.019	2.02	104.994	106.348
3nznFH_B.pdb	32	35	B	5.236	3.664	2.718	2.72	91.301	98.264
2hlsFH_A.pdb	39	42	A	5.474	3.771	2.031	2.03	102.703	103.455
2hlsFH_A.pdb	150	153	A	5.544	3.752	2.036	2.04	101.083	103.119
2q20FH_B.pdb	23	88	B	6.64	3.72	2.163	1.93	108.416	106.717
1cnvFH_A.pdb	23	72	A	5.586	3.933	2.036	2.04	104.824	103.646
1cnvFH_A.pdb	41	93	A	5.153	3.988	2.019	2.02	103.814	102.333
1cnvFH_A.pdb	54	62	A	4.873	3.87	2.035	2.04	103.921	103.442
1cnvFH_A.pdb	165	194	A	5.883	3.642	2.027	2.03	104.71	105.234
2cftFH_A.pdb	91	221	A	5.93	3.698	2.06	2.06	102.602	102.282
3nt1FH_B.pdb	36	47	B	5.976	3.772	2.051	2.05	102.037	104.84
3nt1FH_B.pdb	37	159	B	5.597	3.823	2.03	2.03	104.416	103.988
3nt1FH_B.pdb	41	57	B	5.703	3.88	2.031	2.03	105.746	103.929
3nt1FH_B.pdb	59	69	B	5.519	3.884	2.04	2.04	105.452	105.993
3nt1FH_B.pdb	569	575	B	4.007	4.049	2.029	2.03	103.955	105.991
3m8oFH_H.pdb	22	98	H	6.27	3.588	2.035	2.03	110.345	99.171
3m8oFH_H.pdb	145	204	H	6.867	3.934	2.051	2.05	126.453	114.122
3m8oFH_H.pdb	196	220	H	5.416	4.097	2.032	2.03	111.209	107.808
1mplFH_A.pdb	291	344	A	5.792	3.626	2.1	2.1	103.841	100.492
1bteFH_A.pdb	11	41	A	5.618	3.817	2.064	2.06	104.272	102.98
1bteFH_A.pdb	31	59	A	5.688	3.825	2.055	2.06	108.31	103.794
1bteFH_A.pdb	66	85	A	5.309	4.143	2.024	2.02	103.491	106.034
1bteFH_A.pdb	72	84	A	5.176	4.005	2.078	2.08	102.368	103.989
1bteFH_A.pdb	86	91	A	6.226	3.92	2.092	2.09	105.398	103.467
2j8bFH_A.pdb	3	26	A	5.394	3.712	2.039	2.04	104.214	103.138
2j8bFH_A.pdb	6	13	A	6.212	4.033	2.056	2.06	106.882	103.858
2j8bFH_A.pdb	19	39	A	5.853	3.749	2.029	2.03	104.749	103.516
2j8bFH_A.pdb	45	63	A	6.428	3.767	1.971	1.97	105.286	102.69
2j8bFH_A.pdb	45	63	A	6.428	3.767	1.971	2.04	105.286	102.69
2j8bFH_A.pdb	64	69	A	6.247	3.881	2.02	2.02	101.101	102.687
3gnzFH_P.pdb	37	63	P	5.001	3.599	2.029	2.03	104.074	103.647
3hhiFH_B.pdb	107	136	B	5.747	3.719	2.042	2.04	103.475	104.703
3hhiFH_B.pdb	119	162	B	4.77	4.001	2.054	2.05	111.678	103.504
3hhiFH_B.pdb	154	215	B	4.835	3.89	2.035	2.04	104.834	103.58
3hhiFH_B.pdb	155	158	B	5.541	3.79	2.06	2.06	105.053	104.772
3hhiFH_B.pdb	184	219	B	4.464	3.931	2.092	2.09	104.299	103.83
3hhiFH_B.pdb	192	205	B	4.854	3.931	2.06	2.06	103.036	107.417
1uv4FH_A.pdb	205	206	A	3.712	4.28	2.033	2.03	113.805	112.984
2dtxFH_A.pdb	173	238	A	6.052	4.329	2.036	2.04	105.198	109.887
1r26FH_A.pdb	30	33	A	5.32	3.734	2.659	2.66	98.722	97.459
2zs0FH_A.pdb	2	130	A	4.606	3.936	2.044	2.04	107.903	103.144
2v9tFH_B.pdb	273	279	B	6.02	3.802	2.056	2.06	100.09	107.127
2v9tFH_B.pdb	277	286	B	4.282	4.085	2.05	2.05	103.995	105.184
2v9tFH_B.pdb	434	457	B	5.678	3.764	2.026	2.03	103.192	103.362
2v9tFH_B.pdb	436	478	B	4.96	3.832	2.127	2.13	108.86	103.559
3m6zFH_A.pdb	314	338	A	5.957	3.91	2.045	2.05	102.451	102.971
3hjeFH_A.pdb	338	360	A	5.918	3.753	2.046	2.05	104.295	103.64
3hjeFH_A.pdb	418	653	A	5.678	3.938	2.044	2.04	107.075	105.468
3kl6FH_B.pdb	1	12	B	5.95	3.816	2.044	2.04	104.663	106.547
3kl6FH_B.pdb	8	21	B	5.473	3.655	2.029	2.03	105.138	104.304
3kl6FH_B.pdb	23	36	B	6.01	3.865	2.054	2.05	104.812	103.885
1sznFH_A.pdb	24	56	A	5.264	4.003	2.052	2.05	106.961	103.798
1sznFH_A.pdb	104	134	A	5.238	3.908	2.064	2.06	104.018	103.611
1sznFH_A.pdb	147	160	A	5.785	3.7	2.008	2.01	104.263	105.155
1sznFH_A.pdb	392	414	A	6.155	4.065	2.057	2.06	104.856	106.188
2f9sFH_B.pdb	74	77	B	5.228	3.698	4.03	2.94	54.357	109.082
3bwuFH_F.pdb	16	56	F	4.042	4.166	2.076	2.08	105.273	102.792
3fasFH_B.pdb	204	259	B	5.69	3.695	2.017	2.02	103.226	104.293
3fy1FH_B.pdb	26	51	B	6.265	3.875	2.045	2.05	104.582	104.458
3fy1FH_B.pdb	49	394	B	5.362	3.489	2.045	2.05	97.147	108.875
3fy1FH_B.pdb	307	372	B	5.175	3.92	2.03	2.03	103.853	104.396
1rfsFH_A.pdb	112	127	A	6.447	3.774	2.025	2.03	104.299	104.907
3d34FH_A.pdb	9	145	A	6.066	3.786	2.029	2.03	103.535	102.087
3odvFH_A.pdb	8	28	A	6.059	3.91	2.056	2.06	103.615	101.784
3odvFH_A.pdb	14	33	A	5.545	3.735	2.064	2.06	103.502	102.156
3odvFH_A.pdb	18	35	A	5.63	3.755	2.04	2.04	103.468	105.996
2tnfFH_B.pdb	69	101	B	5.577	3.415	2.031	2.03	101.297	102.075
1vkeFH_F.pdb	59	62	F	5.308	3.681	2.15	2.15	107.548	107.122
3o41FH_A.pdb	22	92	A	6.339	3.606	2.079	2.08	106.957	101.688
3o41FH_A.pdb	140	195	A	6.624	3.756	2.028	2.03	107.462	100.651
2vsmFH_A.pdb	189	601	A	5.093	4.1	2.052	2.05	103.692	103.479
2vsmFH_A.pdb	216	240	A	5.279	4	2.061	2.06	105.686	106.093
2vsmFH_A.pdb	282	295	A	4.054	4.148	2.088	2.09	103.227	107.573
2vsmFH_A.pdb	382	395	A	5.61	3.708	2.142	2.14	102.993	104.622
2vsmFH_A.pdb	387	499	A	5.731	3.649	2.059	2.06	101.411	101.64
2vsmFH_A.pdb	493	503	A	6.529	3.927	2.061	2.06	104.842	105.412
2vsmFH_A.pdb	565	574	A	4.006	4.072	2.049	2.05	107.881	105.213
3g39FH_A.pdb	2	8	A	5.778	3.641	2.028	2.03	104.755	101.246
3g39FH_A.pdb	6	15	A	4.388	4.07	2.063	2.06	105.129	103.859
3g39FH_A.pdb	115	147	A	5.475	3.589	2.031	2.03	99.964	99.35
3g39FH_A.pdb	117	167	A	4.839	4.027	2.04	2.04	104.607	102.216
1qb5FH_E.pdb	10	81	E	5.687	3.798	2.039	2.04	104.39	103.029
2j23FH_A.pdb	30	33	A	5.488	3.728	2.293	2.29	95.658	103.657
1c4qFH_B.pdb	204	257	B	5.588	3.798	2.044	2.04	104.428	105.139
1xqoFH_A.pdb	36	155	A	5.573	3.697	4.219	2.03	61.478	61.666
1xqoFH_A.pdb	85	113	A	5.226	3.564	2.01	2.01	103.204	102.019
1xqoFH_A.pdb	181	251	A	5.882	3.649	2.064	2.06	99.429	107.231
2f5xFH_A.pdb	142	178	A	6.077	3.551	2.07	2.07	101.924	106.549
1wbiFH_H.pdb	4	81	H	5.787	3.715	2.085	2.08	103.78	102.394
2posFH_D.pdb	7	71	D	5.066	3.982	2.029	2.03	103.852	105.479
2posFH_D.pdb	27	56	D	4.719	3.991	2.054	2.05	103.892	104.14
2posFH_D.pdb	51	93	D	5.602	3.607	2.017	2.02	102.384	101.83
2wnfFH_A.pdb	62	67	A	5.89	4.11	2.062	2.06	107.678	105.916
2wnfFH_A.pdb	64	142	A	5.296	4.196	2.042	2.04	106.207	103.65
2wnfFH_A.pdb	145	284	A	6.101	3.62	1.993	1.99	100.966	107.062
3ouiFH_A.pdb	201	208	A	5.895	3.876	2.61	2.61	85.756	92.418
1kveFH_D.pdb	190	219	D	4.907	3.803	2	2	107.84	102.519
3b9dFH_A.pdb	116	121	A	4.154	4.125	2.033	2.03	104.219	103.898
3b9dFH_A.pdb	196	217	A	5.773	3.79	2.029	2.03	103.876	103.377
3b9dFH_A.pdb	409	418	A	5.692	3.565	2.03	2.03	103.796	102.779
2e0qFH_A.pdb	64	67	A	5.278	3.712	2.175	2.18	100.445	105.111
1llfFH_B.pdb	1060	1097	B	4.937	3.804	2.053	2.05	102.638	104.475
1llfFH_B.pdb	1268	1277	B	5.811	3.664	2.217	2.22	97.582	100.609
1eisFH_A.pdb	3	18	A	5.994	3.903	2.012	2.01	103.96	102.927
1eisFH_A.pdb	12	24	A	5.883	3.832	2.029	2.03	102.751	102.759
1eisFH_A.pdb	17	31	A	5.132	3.89	2.03	2.03	99.895	103.247
1eisFH_A.pdb	35	39	A	5.87	3.794	2.01	2.01	102.38	103.973
1eisFH_A.pdb	49	64	A	6.011	3.906	2.038	2.04	104.758	102.548
1eisFH_A.pdb	58	70	A	5.642	3.727	2.017	2.02	105.654	106.065
1eisFH_A.pdb	63	77	A	5.213	3.907	2.041	2.04	103.182	102.284
1eisFH_A.pdb	82	86	A	6.021	3.834	2.026	2.03	102.941	103.902
2pu9FH_A.pdb	57	87	A	5.727	4.373	2.982	2.98	82.859	93.642
2vyoFH_A.pdb	22	215	A	4.596	3.948	2.065	2.06	102.629	103.173
3nrfFH_A.pdb	69	125	A	5.954	3.772	2.079	2.08	102.404	102.577
1uasFH_A.pdb	21	53	A	5.307	3.969	2.031	2.03	105.628	104.053
1uasFH_A.pdb	101	132	A	5.141	3.921	2.029	2.03	103.328	103.76
1eq9FH_B.pdb	342	358	B	6.309	3.719	2.029	2.03	101.641	103.241
1eq9FH_B.pdb	468	482	B	6.565	3.772	2.029	2.03	103.732	102.65
1eq9FH_B.pdb	491	520	B	4.771	3.84	2.025	2.03	105.02	104.209
3p73FH_A.pdb	98	161	A	6.174	3.996	4.49	2.24	90.377	42.933
3p73FH_A.pdb	199	255	A	6.984	4.037	2.98	2.98	91.495	109.057
1dpjFH_A.pdb	45	50	A	6.15	3.533	2.035	2.04	100.999	103.273
1dpjFH_A.pdb	249	282	A	5.302	4.14	2.044	2.04	107.814	106.815
1ta3FH_A.pdb	25	66	A	5.392	3.774	2.05	2.05	104.9	99.44
1ta3FH_A.pdb	164	195	A	5.701	3.726	2.131	2.13	105.714	109.236
2bemFH_A.pdb	41	49	A	5.912	3.485	2.057	2.06	100.304	102.396
2bemFH_A.pdb	145	162	A	6.107	3.663	2.03	2.03	101.044	101.912
2op3FH_A.pdb	22	66	A	4.534	3.88	2.068	2.07	108.1	105.181
2op3FH_A.pdb	56	99	A	4.862	4.071	2.111	2.11	104.054	107.029
2op3FH_A.pdb	158	206	A	4.993	4.106	2.043	2.04	106.006	107.005
1r12FH_A.pdb	15	34	A	5.933	3.697	2.083	2.08	96.559	104.513
1r12FH_A.pdb	51	131	A	4.731	3.986	2.09	2.09	113.586	105.561
1r12FH_A.pdb	112	125	A	6.014	3.822	2.097	2.1	103.461	103.47
1r12FH_A.pdb	206	227	A	5.933	3.749	2.076	2.08	104.378	103.85
1r12FH_A.pdb	239	248	A	5.809	3.761	2.049	2.05	103.502	101.872
2h26FH_A.pdb	102	166	A	6.21	4.006	2.17	2.17	105.143	104.706
2h26FH_A.pdb	131	145	A	5.681	3.79	2.056	2.06	108.943	107.605
2h26FH_A.pdb	206	261	A	6.212	3.508	2.03	2.03	100.368	102.481
1wtaFH_A.pdb	143	210	A	5.04	3.825	2.031	2.03	103.179	108.644
1wtaFH_A.pdb	205	266	A	5.112	3.934	2.045	2.02	112.298	118.581
1wtaFH_A.pdb	264	267	A	5.481	3.794	2.033	2.03	105.281	106.293
3ff7FH_C.pdb	75	86	C	5.593	3.717	2.016	2.02	103.302	101.199
3ff7FH_C.pdb	103	184	C	5.497	3.816	2.053	2.05	105.637	104.933
3ff7FH_C.pdb	163	176	C	5.258	4.008	2.03	2.03	106.236	104.881
1iwdFH_A.pdb	22	63	A	4.734	3.911	2.032	2.03	105.404	103.835
1iwdFH_A.pdb	56	96	A	4.999	3.932	2.026	2.03	103.489	103.989
1iwdFH_A.pdb	152	203	A	5.142	3.879	2.036	2.04	104.921	105.115
2wfoFH_A.pdb	92	237	A	5.512	3.524	2.044	2.04	102.403	102.911
2wfoFH_A.pdb	135	164	A	5.72	3.623	2.035	2.04	103.898	103.5
2wfoFH_A.pdb	207	213	A	5.573	3.52	2.087	2.09	104.813	104.552
2wfoFH_A.pdb	220	229	A	5.635	3.419	2.034	2.03	103.11	102.952
2pqxFH_A.pdb	25	39	A	5.43	3.601	2.028	2.03	101.546	101.597
2pqxFH_A.pdb	80	136	A	5.442	3.495	2.032	2.03	102.942	104.135
2pqxFH_A.pdb	97	124	A	4.975	3.824	2.031	2.03	103.295	103.864
2pqxFH_A.pdb	197	234	A	5.031	3.97	2.031	2.03	105.749	103.51
3kgrFH_A.pdb	49	101	A	5.847	3.681	2.035	2.03	74.108	101.137
3nxqFH_A.pdb	128	136	A	4.003	4.021	2.048	2.05	104.916	105.624
3nxqFH_A.pdb	330	348	A	5.456	3.952	2.067	2.07	107.331	103.861
3nxqFH_A.pdb	516	528	A	6.34	3.914	2.032	2.03	103.23	101.818
1l5oFH_A.pdb	160	256	A	5.479	3.934	2.028	2.03	106.884	100.565
2oizFH_D.pdb	75	140	D	5.53	3.84	2.067	2.07	105.13	105.684
2oizFH_D.pdb	81	113	D	5.82	3.849	2.05	2.05	107.352	104.121
2oizFH_D.pdb	88	171	D	5.087	4.026	2.071	2.07	106.072	104.257
2oizFH_D.pdb	90	138	D	6.23	3.574	2.043	2.04	101.386	102.726
2oizFH_D.pdb	91	135	D	6.049	3.783	2.057	2.06	100.117	101.46
2oizFH_D.pdb	98	129	D	5.724	3.834	2.044	2.04	103.051	105.062
2oizFH_D.pdb	130	161	D	5.827	3.729	2.032	2.03	103.681	100.428
2v7sFH_A.pdb	108	191	A	5.508	3.846	2.038	2.04	104.626	103.737
2r16FH_A.pdb	890	898	A	5.827	3.734	2.059	2.02	108.635	110.314
2we2FH_A.pdb	4	246	A	4.986	3.861	2.011	2.01	104.064	104.665
1w8oFH_A.pdb	351	405	A	5.942	3.646	2.059	2.06	110.113	104.415
1oa2FH_C.pdb	4	32	C	3.92	3.968	2.03	2.03	106.926	108.285
2q8rFH_G.pdb	8	32	G	5.533	3.652	2.035	2.04	104.193	103.401
2q8rFH_G.pdb	9	48	G	5.737	3.596	2.062	2.06	101.005	100.771
3g7nFH_B.pdb	25	254	B	5.787	3.821	2.043	2.04	103.798	104.042
3g7nFH_B.pdb	220	228	B	6.469	4.012	2.057	2.06	104.719	103.205
2fcwFH_B.pdb	88	100	B	5.439	3.77	2.026	2.03	104.412	104.018
2fcwFH_B.pdb	95	113	B	5.795	3.576	2.054	2.05	101.984	101.81
2fcwFH_B.pdb	107	122	B	5.755	3.928	2.031	2.03	103.585	106.412
2fcwFH_B.pdb	127	139	B	5.39	3.997	2.031	2.03	103.743	103.201
2fcwFH_B.pdb	134	152	B	5.759	3.648	2.056	2.06	101.816	102.111
2fcwFH_B.pdb	146	163	B	5.722	3.731	2.074	2.07	101.459	100.762
2x4jFH_A.pdb	55	133	A	3.96	4.062	2.092	2.09	104.257	108.36
3aarFH_A.pdb	244	264	A	4.952	4.001	2.042	2.04	103.295	104.708
3aarFH_A.pdb	330	351	A	5.018	4.097	2.077	2.08	105.718	104.359
2ddxFH_A.pdb	159	189	A	5.832	3.665	2.049	2.05	104.998	104.626
1zr0FH_D.pdb	5	55	D	6.022	4.019	2.108	2.11	104.875	105.224
1zr0FH_D.pdb	14	38	D	5.555	4.095	2.102	2.1	103.282	104.926
1zr0FH_D.pdb	30	51	D	6.162	3.807	2.218	2.22	107.29	98.399
3f7lFH_A.pdb	55	144	A	5.846	3.949	2.248	2.25	102.98	99.564
2o6sFH_A.pdb	24	30	A	6.573	3.716	2.016	2.02	100.702	101.747
2o6sFH_A.pdb	28	37	A	4.584	4.071	2.04	2.04	106.076	103.378
2o6sFH_A.pdb	185	218	A	5.565	3.704	2.027	2.03	102.916	101.956
2o6sFH_A.pdb	187	230	A	5.623	3.746	2.036	2.04	103.133	103.519
1gyhFH_C.pdb	241	242	C	3.774	4.202	2.091	2.09	113.229	118.819
1ijxFH_C.pdb	3	64	C	5.946	3.802	2.027	2.03	104.732	104.857
1ijxFH_C.pdb	11	57	C	5.797	3.797	2.034	2.03	104.761	102.833
1ijxFH_C.pdb	48	87	C	4.983	3.866	2.038	2.04	103.651	103.098
1ijxFH_C.pdb	76	115	C	4.896	3.889	2.044	2.04	103.483	104.822
1ijxFH_C.pdb	80	104	C	5.657	3.759	2.039	2.04	104.657	103.679
1gu2FH_A.pdb	96	104	A	5.585	3.991	2.062	2.06	104.24	104.744
3g08FH_A.pdb	104	168	A	6.278	3.998	2.106	2.11	105.353	106.636
3g08FH_A.pdb	208	263	A	6.327	3.617	2.006	2.01	101.077	103.595
1j8rFH_A.pdb	44	118	A	6.559	3.873	2.043	2.04	103.187	105.339
2rkyFH_C.pdb	155	184	C	5.714	3.729	2.039	2.04	103.361	104.906
2rkyFH_C.pdb	182	194	C	3.942	4.081	2.021	2.02	106.194	103.847
2rkyFH_C.pdb	200	229	C	5.819	3.656	2.027	2.03	103.194	102.46
2rkyFH_C.pdb	227	239	C	3.956	4.051	2.031	2.03	103.482	104.49
1e5pFH_A.pdb	38	42	A	4.416	3.489	2.051	2.05	102.783	105.998
1e5pFH_A.pdb	57	149	A	5.859	3.801	2.062	2.06	102.56	103.833
1yp1FH_A.pdb	117	196	A	5.812	3.879	2.021	2.02	105.309	105.021
1yp1FH_A.pdb	158	180	A	5.75	3.983	2.049	2.05	106.82	102.647
1yp1FH_A.pdb	160	163	A	5.811	3.757	2.039	2.04	99.856	104.101
2xioFH_A.pdb	198	226	A	5.152	4.081	2.058	2.06	106.575	105.801
2fmaFH_A.pdb	133	187	A	4.121	4.101	2.068	2.07	105.365	105.193
2fmaFH_A.pdb	144	174	A	6.232	3.6	2.025	2.03	102.605	100.596
2fmaFH_A.pdb	158	186	A	5.345	3.731	2.032	2.03	106.469	104.655
3aluFH_A.pdb	5	16	A	5.796	3.905	2.108	2.11	106.299	102.098
3aluFH_A.pdb	33	147	A	5.331	3.74	2.06	2.06	104.975	104.103
1z76FH_B.pdb	27	126	B	6.107	3.93	2.062	2.06	103.336	104.095
1z76FH_B.pdb	29	45	B	5.318	3.983	2.064	2.06	105.55	106.833
1z76FH_B.pdb	44	105	B	6.084	3.807	2.07	2.07	103.411	103.991
1z76FH_B.pdb	50	133	B	6.361	4.088	2.053	2.05	106.635	105.636
1z76FH_B.pdb	51	98	B	6.082	3.92	2.068	2.07	104.778	105.376
1z76FH_B.pdb	61	91	B	6.374	4.112	2.057	2.06	108.711	105.255
1z76FH_B.pdb	84	96	B	6.267	3.93	2.065	2.07	103.114	104.026
1md6FH_A.pdb	7	153	A	5.393	3.808	2.043	2.04	105.963	104.686
1qjwFH_B.pdb	176	235	B	4.891	3.864	2.028	2.03	102.69	104.401
1qjwFH_B.pdb	368	415	B	5.034	3.885	2.031	2.03	105.237	103.259
1rkiFH_A.pdb	22	34	A	5.973	4.004	2.118	2.12	103.824	103.55
1rkiFH_A.pdb	24	54	A	6.238	3.997	2.164	2.16	102.227	104.123
1rkiFH_A.pdb	80	83	A	6.31	4.113	2.097	2.1	111.251	105.676
3a07FH_A.pdb	97	111	A	5.187	4.114	2.06	2.06	109.645	102.974
3orvFH_D.pdb	181	196	D	4.081	4.794	2.849	2.85	127.748	105.709
1dlfFH_H.pdb	22	92	H	6.354	3.492	2.027	2.03	103.224	104.669
1wkxFH_A.pdb	3	18	A	5.964	3.779	2.027	2.03	102.34	100.789
1wkxFH_A.pdb	12	24	A	5.8	3.732	2.023	2.02	100.382	100.941
1wkxFH_A.pdb	17	31	A	5.158	3.889	2.036	2.04	102.766	102.699
1wkxFH_A.pdb	37	41	A	5.952	3.823	2.064	2.06	102.904	102.832
1j48FH_A.pdb	34	43	A	3.793	3.897	2.041	2.04	100.903	105.746
1j48FH_A.pdb	83	88	A	5.616	3.817	2.026	2.03	105.382	101.589
3ku3FH_B.pdb	144	148	B	5.241	4.045	2.093	2.09	106.537	103.75
1rieFH_A.pdb	144	160	A	6.402	3.707	2.03	2.03	99.801	104.401
1onjFH_A.pdb	3	23	A	5.507	3.79	2.029	2.03	104.6	104.914
1onjFH_A.pdb	17	40	A	5.959	3.834	2.026	2.03	104.727	103.948
1onjFH_A.pdb	42	53	A	5.614	3.788	2.029	2.03	104.001	102.858
1onjFH_A.pdb	54	59	A	6.149	3.68	2.023	2.02	99.469	103.067
3gp7FH_A.pdb	93	113	A	5.905	3.833	2.078	2.08	107.597	110.053
3f95FH_B.pdb	736	741	B	3.875	4.088	2.067	2.07	105.138	104.46
3f95FH_B.pdb	768	811	B	5.799	3.725	2.013	2.01	103.735	103.704
2ccwFH_A.pdb	3	26	A	5.815	3.903	2.128	2.02	109.202	93.566
2ccwFH_A.pdb	3	26	A	5.815	3.903	2.128	2.13	109.202	93.566
2agdFH_B.pdb	130	172	B	4.782	3.857	2.043	2.04	104.202	104.771
2agdFH_B.pdb	243	262	B	5.751	3.816	2.046	2.05	103.093	105.799
1ys1FH_X.pdb	190	270	X	4.686	3.777	2.033	2.03	104.449	104.397
1llnFH_A.pdb	32	259	A	5.474	3.491	2.033	2.03	103.89	103.3
1llnFH_A.pdb	81	98	A	5.848	3.904	2.038	2.04	105.972	104.676
3l91FH_A.pdb	67	148	A	5.95	3.984	2.049	2.05	106.434	105.973
1bhpFH_A.pdb	3	39	A	5.64	3.67	1.937	1.94	108.355	104.481
1bhpFH_A.pdb	4	31	A	4.255	4.083	2.001	2	103.784	112.331
1bhpFH_A.pdb	12	29	A	5.538	3.494	2.011	2.01	105.413	102.17
1bhpFH_A.pdb	16	25	A	5.708	3.752	2.015	2.02	104.625	106.782
2hq4FH_A.pdb	3	56	A	5.642	3.795	2.162	2.16	104.866	105.589
3edgFH_A.pdb	42	198	A	5.541	3.638	2.087	2.09	104.643	103.833
3edgFH_A.pdb	62	84	A	6.105	3.877	2.026	2.03	103.865	105.068
2x3cFH_A.pdb	181	252	A	5.097	3.935	2.135	2.13	101.699	102.685
2x3cFH_A.pdb	254	273	A	4.813	4.005	2.122	2.12	101.311	102.113
1qlwFH_A.pdb	71	72	A	3.75	4.05	2.046	2.05	108.353	113.611
1qlwFH_A.pdb	234	269	A	5.362	4.102	2.084	2.08	111.944	103.611
1djrFH_G.pdb	9	86	G	5.702	3.682	2.073	2.07	100.445	102.973
1gwuFH_A.pdb	11	91	A	5.736	3.657	2.023	2.02	103.574	102.78
1gwuFH_A.pdb	11	91	A	5.736	3.657	2.023	2.05	103.574	102.78
1gwuFH_A.pdb	44	49	A	3.972	4.264	2.044	2.04	104.718	108.379
1gwuFH_A.pdb	97	301	A	5.871	3.909	2.046	2.05	104.013	104.782
1gwuFH_A.pdb	177	209	A	5.518	3.617	2.022	2.02	103.427	104.244
2vxzFH_A.pdb	24	66	A	4.579	4.215	2.045	2.05	104.065	105.182
2fbdFH_A.pdb	6	121	A	4.704	3.539	2.057	2.06	105.464	103.042
2fbdFH_A.pdb	27	111	A	5.747	3.549	2.039	2.04	102.359	100.937
2fbdFH_A.pdb	62	78	A	4.791	3.889	2.069	2.07	103.676	102.832
2fbdFH_A.pdb	74	92	A	5.354	3.664	1.991	1.99	103.159	106.597
1yphFH_E.pdb	168	182	E	6.197	3.52	2.068	2.07	100.977	99.331
1yphFH_E.pdb	191	220	E	5.388	3.687	2.054	2.05	104.972	102.464
1kgcFH_D.pdb	22	90	D	6.427	3.682	2.038	2.04	102.174	100.7
1kgcFH_D.pdb	139	189	D	5.501	3.849	2.034	2.03	104.476	104.83
1xvoFH_A.pdb	41	57	A	6.662	4.151	3.247	2.07	72.998	81.11
1xvoFH_A.pdb	165	180	A	6.339	3.606	2.042	2.04	100.081	102.549
1xvoFH_A.pdb	191	216	A	5.497	4.489	3.254	2.06	74.962	99.778
1h1nFH_A.pdb	212	249	A	5.275	4.057	2.051	2.05	103.009	103.187
2wnvFH_F.pdb	151	165	F	4.044	4.075	2.042	2.04	103.997	103.603
2p49FH_B.pdb	22	96	B	6.22	3.57	2.032	2.03	101.973	100.75
2wnvFH_A.pdb	150	168	A	4.086	4.109	2.047	2.05	104.379	104.442
2fhfFH_A.pdb	85	122	A	4.769	3.858	2.031	2.03	103.842	104.413
2fhfFH_A.pdb	503	518	A	5.831	3.827	2.038	2.04	105.009	104.503
2fhfFH_A.pdb	643	644	A	3.7	4.26	2.051	2.05	109.61	110.38
2aibFH_A.pdb	3	71	A	4.812	3.931	2.013	2.01	105.729	107.213
2aibFH_A.pdb	27	56	A	4.541	3.957	2.12	2.12	103.437	102.39
2aibFH_A.pdb	51	95	A	5.543	3.572	2.027	2.03	102.211	101.294
1psrFH_A.pdb	46	95	A	5.182	3.905	2.067	2.07	102.244	104.758
3iboFH_A.pdb	3	26	A	5.843	3.883	2.033	2.03	104.45	103.339
2zs1FH_B.pdb	2	132	B	4.812	3.992	2.046	2.05	107.072	105.748
1xiwFH_A.pdb	28	77	A	6.138	3.823	2.047	2.05	105.385	104.841
3hbgFH_A.pdb	239	328	A	6.063	3.434	2.032	2.03	102.059	104.233
1k5nFH_A.pdb	101	164	A	6.325	4.015	2.133	2.13	104.517	104.975
1k5nFH_A.pdb	203	259	A	6.397	3.579	2.062	2.06	99.079	101.782
3d4uFH_A.pdb	66	79	A	6.182	3.834	2.042	2.04	105.071	104.508
3d4uFH_A.pdb	138	161	A	4.936	3.837	2.012	2.01	106.923	103.895
3d4uFH_A.pdb	152	166	A	5.359	3.565	2.069	2.07	103.111	105.751
2x8rFH_A.pdb	115	154	A	5.375	3.774	2.049	2.05	105.249	104.359
1tgrFH_A.pdb	6	38	A	5.65	3.753	2.062	2.06	104.289	106.584
1tgrFH_A.pdb	18	51	A	5.128	3.77	2.04	2.04	104.081	107.646
1tgrFH_A.pdb	37	42	A	5.364	3.597	2.027	2.03	101.426	102.527
3ks9FH_A.pdb	67	109	A	6.168	3.838	2.027	2.03	104.026	102.616
3ks9FH_A.pdb	378	394	A	5.193	3.957	2.038	2.04	103.215	105.689
3ks9FH_A.pdb	432	439	A	5.749	3.789	2.104	2.1	104.087	106.919
3ib0FH_A.pdb	348	380	A	5.816	3.751	2.042	2.04	105.521	103.317
3ib0FH_A.pdb	358	371	A	6.089	3.921	2.051	2.05	103.145	104.042
3ib0FH_A.pdb	405	684	A	4.282	3.789	2.185	2.19	105.344	98.554
3ib0FH_A.pdb	425	647	A	6.233	3.936	2.039	2.04	104.784	104.488
3ib0FH_A.pdb	457	532	A	6.006	3.522	2.043	2.04	103.567	103.42
3ib0FH_A.pdb	481	675	A	5.127	3.559	2.04	2.04	104.2	104.127
3ib0FH_A.pdb	491	505	A	4.638	4.056	2.05	2.05	104.321	106.804
3ib0FH_A.pdb	502	515	A	5.701	3.601	1.993	1.99	115.541	102.991
3ib0FH_A.pdb	573	587	A	4.714	4.056	2.035	2.04	106.833	104.829
3ib0FH_A.pdb	625	630	A	4.922	4.072	2.051	2.05	107.4	105.218
1sxrFH_A.pdb	11	134	A	4.973	3.954	2.036	2.67	106.204	105.611
1sxrFH_A.pdb	48	54	A	5.245	4.051	2.032	2.2	102.47	105.555
1hx1FH_B.pdb	201	259	B	4.48	3.975	2.04	2.04	103.933	106.371
1skzFH_A.pdb	8	19	A	5.501	3.698	2.035	2.04	104.259	106.201
1skzFH_A.pdb	13	26	A	5.77	3.753	2.015	2.02	105.852	103.66
1skzFH_A.pdb	28	48	A	5.517	3.714	2.027	2.03	106.46	100.886
1skzFH_A.pdb	33	51	A	6.205	3.878	2.039	2.04	103.671	102.665
1skzFH_A.pdb	37	53	A	5.099	3.611	2.04	2.04	103.476	107.644
1skzFH_A.pdb	62	73	A	6.029	3.68	2.026	2.03	103.632	102.282
1skzFH_A.pdb	67	80	A	5.462	3.803	2.018	2.02	106.625	102.502
1skzFH_A.pdb	82	103	A	5.372	3.812	2.052	2.05	106.353	105.42
1skzFH_A.pdb	88	106	A	5.326	3.556	2.042	2.04	98.565	105.379
1skzFH_A.pdb	92	108	A	5.376	3.633	2.033	2.03	105.476	106.799
1w32FH_A.pdb	269	273	A	5.225	4.148	2.522	2.13	88.258	110.538
1w32FH_A.pdb	269	273	A	5.225	4.148	2.522	2.52	88.258	110.538
1qfoFH_B.pdb	22	79	B	4.743	3.779	2.03	2.03	104.823	104.334
1mfaFH_H.pdb	272	346	H	6.362	3.53	2.014	2.01	101.563	96.237
1upsFH_B.pdb	57	86	B	5.645	4.413	2.069	2.07	112.627	101.984
2uywFH_A.pdb	6	82	A	5.957	3.547	2.065	2.06	101.451	105.189
1tf8FH_A.pdb	245	250	A	5.314	4.036	2.082	2.08	101.994	105.975
3c9xFH_A.pdb	250	283	A	4.959	4.119	2.062	2.06	104.658	109.143
3e2vFH_B.pdb	116	117	B	3.701	4.243	2.09	2.09	112.85	107.029
3e2vFH_B.pdb	303	331	B	4.841	3.969	2.064	2.06	103.589	104.195
2pgzFH_A.pdb	127	140	A	5.475	3.578	1.967	1.97	103.179	101.826
2pgzFH_A.pdb	190	191	A	3.736	4.243	2.064	2.06	108.553	107.977
3m7oFH_A.pdb	33	58	A	6.226	3.543	2	2	102.313	101.118
3m7oFH_A.pdb	45	154	A	4.939	3.983	2.056	2.06	109.521	105.794
3m7oFH_A.pdb	102	112	A	6.024	3.829	2.029	2.03	105.039	104.758
2g84FH_A.pdb	180	189	A	5.851	3.677	2.064	2.06	102.202	104.103
1nnsFH_A.pdb	77	105	A	5.644	3.694	2.002	2	103.423	105.38
2vq8FH_A.pdb	26	86	A	5.858	3.692	2.03	2.03	103.505	104.037
2vq8FH_A.pdb	46	97	A	5.539	3.734	2.042	2.04	103.593	103.089
2vq8FH_A.pdb	64	112	A	5.842	3.624	2.025	2.03	102.57	105.29
2cn0FH_H.pdb	42	58	H	6.13	3.716	2.039	2.04	102.275	101.326
2cn0FH_H.pdb	168	182	H	6.065	3.865	2.024	2.02	103.983	103.994
2cn0FH_H.pdb	191	220	H	5.484	3.81	2.079	2.08	106.46	101.642
2ntpFH_A.pdb	192	212	A	4.455	4.268	2.057	2.06	108.013	103.033
3mtrFH_B.pdb	426	479	B	6.564	3.783	2.027	2.03	106.854	111.97
3iu4FH_H.pdb	22	92	H	6.286	3.628	2.08	2.08	103.258	100.48
3iu4FH_H.pdb	140	196	H	6.467	3.665	2.044	2.04	102.784	102.816
3gshFH_A.pdb	3	50	A	5.105	3.654	2.02	2.02	104.744	104.865
3gshFH_A.pdb	13	27	A	4.647	3.924	2.054	2.05	102.121	103.468
3gshFH_A.pdb	28	73	A	4.995	3.471	2.035	2.04	103.257	102.04
3gshFH_A.pdb	48	87	A	5.749	3.786	2.017	2.02	101.664	107.003
3c7xFH_A.pdb	319	508	A	5.666	3.817	2.03	2.03	103.125	104.345
1smoFH_A.pdb	41	113	A	6.688	3.697	2.118	2.12	106.02	102.701
2dpfFH_D.pdb	29	52	D	5.084	3.819	2.028	2.03	104.635	104.317
2qo4FH_A.pdb	80	91	A	5.567	4.048	2.028	2.03	103.487	104.814
3ctkFH_A.pdb	32	212	A	5.735	3.855	2.036	2.04	105.301	104.335
3silFH_A.pdb	42	103	A	6.365	4.153	2.055	2.06	107.547	103.308
2vujFH_A.pdb	5	32	A	3.934	4.17	2.123	2.12	103.942	101.108
2e2oFH_A.pdb	21	291	A	5.414	4.074	2.035	2.04	106.096	104.932
2ga4FH_A.pdb	241	260	A	5.528	3.546	1.99	1.99	102.235	98.451
3dieFH_A.pdb	29	32	A	5.202	3.441	2.051	2.05	102.172	102.683
1kpuFH_B.pdb	25	80	B	6.349	3.719	2.061	2.06	104.463	102.745
1edqFH_A.pdb	115	120	A	4.039	4.269	2.83	2.05	119.362	105.522
1edqFH_A.pdb	195	218	A	5.808	3.753	2.059	2.06	104.165	105.994
1arbFH_A.pdb	6	216	A	5.53	3.655	2.027	2.03	105.92	104.322
1arbFH_A.pdb	12	80	A	4.73	3.856	2.049	2.05	102.706	103.473
1arbFH_A.pdb	36	58	A	6.511	3.834	2.01	2.01	102.739	105.632
1oqvFH_C.pdb	520	586	C	6.27	3.734	2.109	2	103.864	100.278
1qddFH_A.pdb	14	25	A	5.865	3.801	2.04	2.04	103.37	103.939
1qddFH_A.pdb	42	140	A	5.475	3.676	2.043	2.04	104.794	104.505
1qddFH_A.pdb	115	132	A	5.069	3.961	2.028	2.03	106.106	103.857
3go9FH_A.pdb	328	337	A	4.39	5.132	3.664	2.07	134.558	87.84
2h64FH_B.pdb	38	59	B	5.434	3.671	2.025	2.03	102.837	102.59
2h64FH_B.pdb	40	44	B	5.039	3.929	2.03	2.03	103.248	104.043
2h64FH_B.pdb	53	77	B	6.138	3.972	2.024	2.02	104.379	104.563
2h64FH_B.pdb	87	101	B	5.898	3.845	2.034	2.03	103.291	102.72
2h64FH_B.pdb	102	107	B	6.198	3.791	2.028	2.03	102.308	103.529
1ulkFH_A.pdb	4	19	A	6.049	3.882	2.027	2.03	103.833	104.202
1ulkFH_A.pdb	13	25	A	5.913	3.748	2.025	2.03	102.931	103.048
1ulkFH_A.pdb	18	32	A	5.131	3.814	2.027	2.03	103.094	102.909
1ulkFH_A.pdb	36	40	A	5.977	3.817	2.026	2.03	101.793	102.407
1ulkFH_A.pdb	45	60	A	6.005	3.856	2.021	2.02	103.916	102.236
1ulkFH_A.pdb	54	66	A	5.833	3.728	2.026	2.03	102.479	101.94
1ulkFH_A.pdb	59	73	A	5.12	3.822	2.025	2.03	104.402	103.456
1ulkFH_A.pdb	77	81	A	6.026	3.87	2.032	2.03	103.729	103.128
1ulkFH_A.pdb	86	101	A	5.922	3.816	2.031	2.03	103.128	101.772
1ulkFH_A.pdb	95	107	A	5.856	3.785	2.027	2.03	101.896	102.103
1ulkFH_A.pdb	100	114	A	5.211	3.804	2.013	2.01	102.973	102.84
1ulkFH_A.pdb	118	122	A	6.015	3.84	2.024	2.02	102.895	102.859
1r2mFH_A.pdb	3	52	A	5.599	3.688	2.044	2.04	102.349	102.983
1r2mFH_A.pdb	13	43	A	5.057	3.747	2.053	2.05	106.57	107.431
1r2mFH_A.pdb	14	26	A	3.914	4.117	2.042	2.04	106.161	104.683
1r2mFH_A.pdb	53	64	A	4.007	4.042	2.039	2.04	105.589	105.983
3o3uFH_N.pdb	1038	1099	N	5.719	3.942	2.065	2.07	107.468	110.927
3o3uFH_N.pdb	1144	1208	N	6.426	3.612	2.05	2.05	97.555	104.632
3beuFH_B.pdb	42	58	B	6.393	3.738	2.076	2.08	102.497	101.785
3beuFH_B.pdb	168	182	B	6.32	3.494	2.042	2.04	98.634	101.673
3beuFH_B.pdb	191	220	B	5.274	3.699	2.101	2.1	105.3	100.808
3fjuFH_B.pdb	6	18	B	5.829	3.754	2.021	2.02	103.219	102.479
3fjuFH_B.pdb	12	25	B	5.758	3.832	2.031	2.03	105.895	104.098
3fjuFH_B.pdb	34	62	B	5.572	3.791	2.033	2.03	105.851	105.465
3fjuFH_B.pdb	43	58	B	5.953	3.832	2.047	2.05	104.202	101.959
3fjuFH_B.pdb	49	63	B	5.618	3.867	2.052	2.05	105.376	104.354
2bo9FH_C.pdb	138	161	C	5.198	4.037	2.025	2.03	112.069	105.117
3cx5FH_F.pdb	101	123	F	5.97	3.872	2.031	2.03	103.731	103.292
1gbgFH_A.pdb	32	61	A	5.789	3.761	2.062	2.06	104.381	102.231
1khqFH_A.pdb	22	63	A	4.597	3.9	2.039	2.04	106.6	104.107
1khqFH_A.pdb	56	95	A	4.853	3.958	2.01	2.01	104.642	105.203
1khqFH_A.pdb	153	200	A	5.186	3.908	2.062	2.06	104.694	107.457
1uwfFH_A.pdb	3	44	A	3.942	3.937	2.038	2.04	103.451	105.02
3h55FH_B.pdb	38	80	B	5.826	4.252	2.036	2.04	103.355	105.735
3h55FH_B.pdb	42	49	B	5.458	4.106	2.041	2.04	104.895	104.312
3h55FH_B.pdb	127	158	B	5.249	3.947	2.036	2.04	105.442	103.724
3h55FH_B.pdb	187	209	B	6.211	3.942	2.041	2.04	104.47	104.546
2xhnFH_A.pdb	30	73	A	6.156	3.475	2.027	2.03	100.534	102.396
2xhnFH_A.pdb	164	173	A	4.024	4.012	2.133	2.13	104.769	104.138
3mtwFH_A.pdb	172	213	A	5.825	3.683	2.021	2.02	109.158	103.477
1j34FH_B.pdb	202	213	B	5.721	3.811	2.029	2.03	103.741	102.726
1j34FH_B.pdb	230	319	B	5.389	3.791	2.033	2.03	105.24	105.041
1j34FH_B.pdb	296	311	B	5.032	4.017	2.032	2.03	106.671	104.48
1wdyFH_A.pdb	293	301	A	5.551	3.648	2.074	2.07	107.881	107.018
2i8gFH_A.pdb	25	55	A	5.59	3.69	2.095	2.1	102.629	103.09
1pfzFH_A.pdb	47	52	A	5.913	3.64	2.024	2.02	103.932	104.422
1pfzFH_A.pdb	249	285	A	5.067	4.103	2.03	2.03	104.629	105.735
2xwcFH_A.pdb	153	159	A	5.842	3.601	2.011	2.01	103.321	100.419
2uwaFH_A.pdb	218	226	A	6.006	3.958	2.076	2.08	103.51	106.404
2uwaFH_A.pdb	258	271	A	5.641	3.752	2.062	2.06	106.021	105.456
2c3bFH_B.pdb	43	168	B	5.497	4.325	4.492	2.04	67.904	70.046
3o79FH_A.pdb	179	214	A	6.023	3.634	2.051	2.05	104.603	103.081
1fecFH_B.pdb	51	56	B	4.669	4.305	3.644	2.04	54.338	105.739
2uytFH_A.pdb	68	222	A	5.788	3.636	2.029	2.03	104.283	103.723
1eb6FH_A.pdb	6	78	A	4.904	3.656	1.985	1.99	102.319	104.136
1eb6FH_A.pdb	85	103	A	5.962	3.846	2.044	2.04	102.843	102.429
1eb6FH_A.pdb	117	177	A	6.32	4.032	2.063	2.06	104.607	108.054
1eb6FH_A.pdb	117	177	A	6.32	4.032	2.063	2.1	104.607	108.054
1dw0FH_B.pdb	89	97	B	5.525	3.879	1.977	1.98	105.566	103.697
1jakFH_A.pdb	263	282	A	5.033	4.016	2.039	2.04	106.299	103.007
2wk1FH_A.pdb	228	231	A	5.371	3.686	2.167	2.17	108.9	107.22
2qskFH_A.pdb	7	55	A	5.703	3.794	2.044	2.04	105.717	108.261
2qskFH_A.pdb	20	32	A	5.958	4.283	3.501	2.07	97.08	77.407
2qskFH_A.pdb	26	38	A	5.518	3.984	3.599	2.04	91.733	77.554
2qskFH_A.pdb	68	80	A	6.022	4.418	3.55	2.07	103.54	72.623
2qskFH_A.pdb	74	86	A	5.419	3.936	3.778	2.11	91.03	72.469
3gi7FH_B.pdb	95	116	B	5.953	4.083	2.104	2.1	108.833	107.781
2wfzFH_A.pdb	67	94	A	5.09	3.883	2.072	2.07	104.803	102.888
2wfzFH_A.pdb	254	265	A	5.712	3.563	2.034	2.03	103.523	105.174
2wfzFH_A.pdb	402	521	A	4.995	3.75	2.052	2.05	104.917	106.737
1fvuFH_B.pdb	402	413	B	5.826	3.773	2.028	2.03	102.884	102.859
1fvuFH_B.pdb	430	521	B	5.502	3.773	2.031	2.03	104.325	104.882
1fvuFH_B.pdb	498	513	B	4.98	4.004	2.037	2.04	107.16	105.345
6celFH_A.pdb	4	72	A	5.697	3.906	2.027	2.03	103.902	103.962
6celFH_A.pdb	19	25	A	3.931	4.027	2.031	2.03	103.862	105.528
6celFH_A.pdb	50	71	A	6.366	3.838	2.026	2.03	102.641	102.596
6celFH_A.pdb	61	67	A	4.043	3.37	2.032	2.03	103.166	103.608
6celFH_A.pdb	138	397	A	6	3.785	2.024	2.02	102.14	103.815
6celFH_A.pdb	172	210	A	5.439	3.73	2.029	2.03	103.962	102.091
6celFH_A.pdb	176	209	A	4.011	4.113	2.03	2.03	103.621	102.695
6celFH_A.pdb	230	256	A	3.939	3.984	2.035	2.04	103.972	102.784
6celFH_A.pdb	238	243	A	5.209	3.981	2.031	2.03	104.268	102.594
6celFH_A.pdb	261	331	A	5.481	3.835	2.033	2.03	103.147	104.069
1ezmFH_A.pdb	30	58	A	5.729	3.766	2.021	2.02	102.574	105.245
1ezmFH_A.pdb	270	297	A	4.838	3.983	2.01	2.01	102.322	105.984
2j7zFH_A.pdb	9	34	A	5.88	3.734	2.035	2.03	102.393	101.819
2j7zFH_A.pdb	11	50	A	6.023	3.718	2.031	2.03	102.561	103.326
3m31FH_A.pdb	90	349	A	4.872	3.884	2.036	2.04	104.184	103.639
3m31FH_A.pdb	100	105	A	6.135	3.745	2.028	2.03	102.446	103.066
3m31FH_A.pdb	143	166	A	4.877	3.81	2.037	2.04	103.039	103.545
3m31FH_A.pdb	352	355	A	5.246	3.682	2.054	2.05	104.166	103.112
3ff9FH_B.pdb	75	86	B	5.723	3.81	2.031	2.03	103.529	103.733
3ff9FH_B.pdb	103	184	B	5.489	3.837	2.038	2.04	105.157	104.856
3ff9FH_B.pdb	163	176	B	5.126	3.943	2.029	2.03	104.861	103.889
1d0dFH_A.pdb	5	59	A	5.692	3.567	2.028	2.03	100.192	100.704
1d0dFH_A.pdb	15	39	A	4.864	3.94	2.028	2.03	105.956	103.57
1d0dFH_A.pdb	33	55	A	6.42	3.796	2.028	2.03	104.037	104.889
2z8qFH_A.pdb	21	48	A	5.808	3.968	2.055	2.04	105.9	104.002
2jcqFH_A.pdb	32	134	A	4.421	4.14	2.08	2.08	104.385	102.81
2jcqFH_A.pdb	57	123	A	5.372	3.997	2.171	2.17	107.784	104.485
2jcqFH_A.pdb	81	101	A	5.019	3.941	2.049	2.05	104.102	104.712
1w7cFH_A.pdb	45	756	A	4.877	3.915	2.014	2.01	109.613	105.744
1w7cFH_A.pdb	212	233	A	4.03	4.216	2.114	2.11	107.214	109.39
1w7cFH_A.pdb	415	440	A	6.896	3.925	2.08	2.08	108.364	106.706
1ab1FH_A.pdb	3	40	A	5.706	3.58	2.028	2.03	101.587	102.739
1ab1FH_A.pdb	4	32	A	4.156	4.047	2.043	2.04	103.785	105.485
1ab1FH_A.pdb	16	26	A	5.811	3.781	2.033	2.03	105.332	102.972
1gpiFH_A.pdb	19	25	A	4.027	4.169	2.088	2.09	105.327	104.678
1gpiFH_A.pdb	50	71	A	6.323	3.927	2.049	2.05	102.059	105.33
1gpiFH_A.pdb	61	67	A	4.053	3.377	2.066	2.07	100.831	104.661
1gpiFH_A.pdb	135	394	A	5.885	3.791	1.887	1.89	105.317	109.83
1gpiFH_A.pdb	169	205	A	5.421	3.806	2.035	2.03	105.88	102.602
1gpiFH_A.pdb	173	204	A	4.096	4.181	2.014	2.01	101.996	104.823
1gpiFH_A.pdb	225	245	A	3.991	3.995	2.047	2.05	105.248	102.886
1gpiFH_A.pdb	233	238	A	5.379	4.179	2.073	2.07	104.317	104.414
1gpiFH_A.pdb	250	327	A	5.707	3.912	2.038	2.04	101.849	107.383
1cf3FH_A.pdb	164	206	A	5.107	3.991	2.006	2.01	105.226	107.786
2yz1FH_B.pdb	29	95	B	6.429	3.606	2.066	2.07	103.128	101.78
3kbfFH_A.pdb	56	148	A	5.801	3.937	2.095	2.1	111.651	95.035
1wbaFH_A.pdb	135	141	A	4.129	4.099	2.021	2.02	104.09	105.045
3nkqFH_A.pdb	58	75	A	5.764	3.676	2.033	2.03	103.947	93.461
3nkqFH_A.pdb	62	93	A	5.368	3.864	2.036	2.04	108.229	108.254
3nkqFH_A.pdb	73	86	A	5.033	3.999	2.043	2.04	108.153	109.809
3nkqFH_A.pdb	79	85	A	4.87	3.974	2.037	2.04	99.497	116.537
3nkqFH_A.pdb	102	119	A	5.954	3.969	2.05	2.05	107.568	98.092
3nkqFH_A.pdb	107	137	A	5.46	3.72	2.037	2.04	106.166	102.495
3nkqFH_A.pdb	117	130	A	4.926	3.904	2.028	2.03	104.032	105.503
3nkqFH_A.pdb	123	129	A	4.851	3.907	2.035	2.04	106.898	102.108
3nkqFH_A.pdb	148	194	A	6.14	3.955	2.038	2.01	115.349	108.963
3nkqFH_A.pdb	156	350	A	4.794	3.89	2.015	2.02	107.903	99.044
3nkqFH_A.pdb	366	468	A	5.933	3.656	2.03	2.03	109.982	74.573
3nkqFH_A.pdb	413	801	A	5.544	3.889	2.028	2.03	108.031	106.425
3nkqFH_A.pdb	566	662	A	4.998	4.019	2.043	2.04	105.997	111.971
3nkqFH_A.pdb	568	647	A	4.055	3.859	2.048	2.05	102.834	102.515
3nkqFH_A.pdb	770	780	A	5.427	3.467	2.033	2.03	102.416	106.652
3hmsFH_A.pdb	70	96	A	5.567	3.816	2.024	2.03	105.115	104.424
3hmsFH_A.pdb	74	84	A	5.286	3.964	2.045	2.05	104.83	105.095
2a8yFH_C.pdb	138	205	C	5.302	3.928	3.498	2.03	114.071	71.824
2a8yFH_C.pdb	200	262	C	5.135	3.902	2.046	2.05	102.65	105.959
3a9bFH_A.pdb	103	164	A	4.932	3.928	2.079	2.08	104.085	104.285
3a9bFH_A.pdb	298	348	A	4.94	3.939	2.05	2.05	106.796	102.765
2i9aFH_D.pdb	11	19	D	5.335	3.365	2.008	2.01	103.828	103.241
2i9aFH_D.pdb	13	31	D	5.707	3.927	2.017	2.02	106.01	102.534
2i9aFH_D.pdb	33	42	D	5.355	3.756	2.042	2.04	106.337	101.022
2i9aFH_D.pdb	50	131	D	5.073	4.008	2.057	2.06	103.669	106.471
2i9aFH_D.pdb	71	113	D	5.643	3.495	2.045	2.05	102.869	101.493
2i9aFH_D.pdb	102	126	D	6.032	3.362	2.011	2.01	97.199	99.372
3c68FH_B.pdb	594	617	B	5.62	3.697	2.028	2.03	103.164	103.678
3kdjFH_B.pdb	267	359	B	5.432	3.712	2.044	2.04	106.026	100.463
2d5wFH_B.pdb	314	458	B	5.763	3.948	2.038	2.04	103.931	104.694
1ojkFH_A.pdb	18	24	A	4.024	4.265	2.135	2.13	109.559	106.258
1ojkFH_A.pdb	51	73	A	6.24	3.875	2.02	2.02	103.915	104.843
1ojkFH_A.pdb	63	69	A	4.149	3.538	2.089	2.09	103.871	104.914
1ojkFH_A.pdb	140	365	A	5.894	3.703	2.05	2.05	101.404	102.165
1ojkFH_A.pdb	172	195	A	5.579	3.909	2.058	2.06	104.796	102.319
1ojkFH_A.pdb	176	194	A	4.205	4.255	2.055	2.06	102.622	104.938
1ojkFH_A.pdb	215	234	A	4.058	4.116	2.027	2.03	107.554	105.42
1ojkFH_A.pdb	223	228	A	5.375	4.116	2.058	2.06	104.384	103.836
1ojkFH_A.pdb	239	315	A	5.597	3.81	2.036	2.04	104.562	101.345
3i26FH_D.pdb	41	57	D	5.996	3.602	2.033	2.03	104.878	100.182
3i26FH_D.pdb	88	136	D	3.911	4.042	2.049	2.05	103.477	103.997
3i26FH_D.pdb	108	156	D	4.442	3.881	2.042	2.04	105.209	104.615
3i26FH_D.pdb	192	273	D	4.994	4.008	2.046	2.05	104.369	105.355
3i26FH_D.pdb	200	246	D	4.108	4.154	2.053	2.05	107.473	106.985
3i26FH_D.pdb	206	213	D	5.414	3.973	2.037	2.04	105.442	105.564
3i26FH_D.pdb	304	309	D	4.829	3.792	2.024	2.02	103.33	103.002
3i26FH_D.pdb	346	371	D	4.948	3.94	2.054	2.05	106.743	104.794
2aqmFH_A.pdb	55	150	A	5.787	3.59	2.056	2.06	102.268	102.081
1jevFH_A.pdb	271	417	A	3.995	4.033	2.044	2.04	105.548	103.852
2b94FH_A.pdb	68	71	A	4.771	3.661	2.084	2.08	104.655	105.353
3ga4FH_A.pdb	55	58	A	5.23	3.553	2.059	2.06	105.128	102.79
1ezgFH_B.pdb	3	12	B	5.111	4.011	2.079	2.08	101.912	102.368
1ezgFH_B.pdb	9	19	B	6.419	3.925	2.022	2.02	103.936	101.202
1ezgFH_B.pdb	16	22	B	6.483	3.757	2.045	2.05	98.672	103.072
1ezgFH_B.pdb	28	34	B	6.539	3.786	2.051	2.05	100.47	101.808
1ezgFH_B.pdb	40	46	B	6.504	3.741	2.047	2.05	98.365	102.879
1ezgFH_B.pdb	52	58	B	6.629	3.874	2.038	2.04	102.569	104.111
1ezgFH_B.pdb	64	70	B	6.547	3.689	2.051	2.05	101.209	102.271
1ezgFH_B.pdb	76	82	B	6.464	3.631	2.029	2.03	104.456	99.923
2czqFH_B.pdb	6	78	B	5.742	3.637	2.042	2.04	102.363	100.963
2czqFH_B.pdb	161	168	B	5.927	3.801	2.047	2.05	102.717	103.065
2xwtFH_C.pdb	24	29	C	5.73	3.734	2.05	2.05	104.368	104.824
2xwtFH_C.pdb	31	41	C	3.874	4.104	2.079	2.08	107.679	103.87
2v8bFH_A.pdb	34	123	A	5.648	4.18	2.293	2.02	105.964	102.909
2v8bFH_A.pdb	178	249	A	5.58	3.677	3.685	2.06	71.68	91.132
1pwaFH_A.pdb	58	70	A	4.728	3.699	2.036	2.04	105.221	103.309
1pwaFH_A.pdb	102	120	A	4.207	4.088	2.023	2.02	104.718	107.91
2cwiFH_B.pdb	6	127	B	5.014	3.725	2.02	2.02	112.962	104.902
2cwiFH_B.pdb	30	115	B	6.071	3.919	2.031	2.03	104.428	103.884
2cwiFH_B.pdb	65	80	B	4.968	3.971	2.047	2.05	102.908	109.363
2cwiFH_B.pdb	76	94	B	5.286	3.571	2.068	2.07	103.622	104.626
3gc6FH_A.pdb	59	75	A	5.823	3.625	2.081	2.08	101.176	102.832
3gc6FH_A.pdb	92	172	A	5.806	3.633	2.077	2.08	103.576	103.616
3gc6FH_A.pdb	112	193	A	4.668	3.842	2.003	2	101.112	101.325
3gc6FH_A.pdb	152	165	A	5.814	3.833	2.136	2.14	102.225	103.083
3gc6FH_A.pdb	244	265	A	5.941	3.727	2.084	2.08	103.078	103.163
3ngjFH_A.pdb	40	61	A	4.572	4.33	2.525	2.53	121.141	96.251
1o0eFH_B.pdb	22	63	B	4.653	3.859	2.035	2.04	104.923	103.794
1o0eFH_B.pdb	56	96	B	4.889	3.894	2.035	2.04	104.6	102.918
1o0eFH_B.pdb	114	193	B	3.908	3.878	2.029	2.03	105.188	104.582
1o0eFH_B.pdb	151	196	B	5.066	3.859	2.031	2.03	103.83	105.111
3n0qFH_A.pdb	199	202	A	4.899	4.065	2.052	2.05	108.581	108.156
3g2sFH_B.pdb	34	73	B	5.085	4.024	2.068	2.07	106.952	108.176
1ixkFH_A.pdb	46	81	A	3.881	3.961	2.038	2.04	105.341	105.704
1ixkFH_A.pdb	197	247	A	4.746	3.743	2.033	2.03	101.72	102.622
1uwcFH_A.pdb	29	258	A	6.064	3.838	2.055	2.05	100.627	103.503
1uwcFH_A.pdb	91	94	A	5.427	3.613	2.012	2.01	105.11	103.117
1uwcFH_A.pdb	227	234	A	6.778	3.921	2.047	2.05	105.636	105.098
3gwnFH_A.pdb	80	83	A	5.254	3.619	2.032	2.03	102.365	103.666
2gaiFH_B.pdb	559	578	B	6.901	4.258	2.089	2.09	107.39	104.419
2gaiFH_B.pdb	561	580	B	5.944	3.592	2.034	2.03	101.508	104.71
1qgjFH_A.pdb	11	88	A	5.719	3.71	2.835	2.63	100.149	87.458
1qgjFH_A.pdb	44	49	A	3.921	4.328	2.402	2.4	98.941	103.632
1qgjFH_A.pdb	94	295	A	5.946	4.101	2.462	2.46	97.375	103.924
1qgjFH_A.pdb	172	204	A	5.724	3.74	2.38	2.38	99.411	98.626
2d1gFH_A.pdb	102	138	A	5.889	3.557	2.035	2.04	101.746	104.773
2d1gFH_A.pdb	216	269	A	5.69	3.591	2.038	2.04	103.877	104.8
2wj9FH_B.pdb	61	65	B	6.306	4.052	2.052	2.05	103.114	103.985
1wc2FH_A.pdb	4	16	A	6.71	3.844	2.06	2.06	103.969	103.504
1wc2FH_A.pdb	30	69	A	5.692	3.774	2.064	2.06	104.269	103.14
1wc2FH_A.pdb	32	176	A	4.164	4.059	2.054	2.05	101.907	105.295
1wc2FH_A.pdb	65	178	A	5.059	3.682	2.034	2.03	105.803	104.222
1wc2FH_A.pdb	72	157	A	5.432	4.102	2.067	2.07	105.043	103.588
1wc2FH_A.pdb	103	113	A	6.269	4.1	2.049	2.05	109.002	109.569
2yzuFH_A.pdb	31	34	A	5.263	3.738	2.039	2.04	102.68	103.843
1o3uFH_A.pdb	24	79	A	5.813	3.763	2.032	2.04	108.61	111.106
3b7eFH_A.pdb	92	417	A	4.978	3.926	2.1	2.1	102.22	104.792
3b7eFH_A.pdb	124	129	A	4.042	4.193	2.122	2.12	105.354	108.859
3b7eFH_A.pdb	183	230	A	5.243	3.988	2.064	2.06	105.602	102.332
3b7eFH_A.pdb	232	237	A	4.12	4.326	2.121	2.12	109.689	110.157
3b7eFH_A.pdb	278	291	A	4.143	4.098	2.163	2.16	102.291	104.169
3b7eFH_A.pdb	280	289	A	3.948	4.115	2.122	2.12	104.565	104.826
3b7eFH_A.pdb	318	336	A	4.5	4.465	2.03	2.03	112.601	105.83
3b7eFH_A.pdb	421	447	A	4.055	4.207	2.14	2.14	102.762	112.493
1gmyFH_A.pdb	14	43	A	5.822	3.766	2.02	2.02	103.026	104.501
1gmyFH_A.pdb	26	71	A	4.582	3.835	2.034	2.03	105.404	103.044
1gmyFH_A.pdb	62	128	A	4.673	3.953	2.048	2.05	103.579	106.149
1gmyFH_A.pdb	63	67	A	5.884	3.706	2.023	2.02	103.152	103.07
1gmyFH_A.pdb	100	132	A	4.281	3.815	2.039	2.04	103.956	105.1
1gmyFH_A.pdb	108	119	A	4.918	3.865	2.028	2.03	101.159	105.337
2x96FH_A.pdb	133	141	A	3.726	3.997	2.041	2.04	104.285	104.328
2x96FH_A.pdb	336	354	A	5.605	3.92	2.045	2.05	105.978	107.302
2x96FH_A.pdb	467	612	A	5.628	3.894	2.052	2.05	106.531	105.761
2x96FH_A.pdb	522	540	A	6.209	3.832	2.032	2.03	103.468	104.257
2w87FH_A.pdb	20	146	A	5.46	3.826	2.151	2.15	101.259	106.595
2qqjFH_A.pdb	277	427	A	4.909	3.78	2.005	2.01	103.579	104.32
2qqjFH_A.pdb	434	592	A	5.094	3.97	2.036	2.04	103.037	107.106
2horFH_A.pdb	20	39	A	5.633	3.75	2.03	2.03	104.64	104.167
2horFH_A.pdb	41	50	A	5.421	3.771	2.046	2.05	104.628	102.671
2horFH_A.pdb	44	57	A	5.818	3.765	2.052	2.05	105.121	104.297
2horFH_A.pdb	368	376	A	5.615	3.664	2.045	2.05	107.882	102.209
1p3cFH_A.pdb	32	48	A	6.451	3.886	2.026	2.03	103.171	105.968
3gbaFH_D.pdb	202	256	D	5.662	3.821	2.029	2.03	105.825	104.202
1qveFH_B.pdb	57	93	B	5.322	3.911	2.173	2.17	104.222	106.763
1qveFH_B.pdb	129	142	B	4.718	4.018	2.022	2.02	109.698	106.906
1lstFH_A.pdb	38	45	A	6.339	3.93	2.013	2.01	103.224	107.496
2regFH_A.pdb	33	247	A	5.733	3.983	2.027	2.03	107.866	108.909
1y5hFH_A.pdb	14	39	A	5.83	3.809	2.024	2.02	104.948	103.869
1jpeFH_A.pdb	103	109	A	3.882	3.851	2.038	2.04	102.924	104.074
1kdgFH_B.pdb	291	300	B	4.901	3.927	1.954	1.95	106.751	106.625
1qnpFH_A.pdb	26	29	A	5.419	3.916	2.042	2.04	104.9	109.084
1qnpFH_A.pdb	172	175	A	5.348	3.502	2.072	2.07	104.496	101.403
1qnpFH_A.pdb	265	272	A	5.611	3.804	2.052	2.05	106.172	106.544
1qnpFH_A.pdb	284	334	A	5.89	3.78	2.047	2.05	106.954	102.813
3lqbFH_A.pdb	5	10	A	6.234	3.731	2.016	2.02	101.954	107.946
3lqbFH_A.pdb	50	199	A	5.326	3.51	2.047	2.05	105.789	103.589
3lqbFH_A.pdb	71	91	A	5.667	3.719	2.026	2.03	103.035	103.675
2hvmFH_A.pdb	20	67	A	5.381	3.908	2.029	2.03	103.973	102.947
2hvmFH_A.pdb	50	57	A	5.343	4.074	2.03	2.03	104.353	103.888
2hvmFH_A.pdb	159	188	A	6.015	3.727	2.032	2.03	105.169	106.293
1segFH_A.pdb	12	63	A	4.487	3.921	2.066	2.07	104.929	109.783
1segFH_A.pdb	16	36	A	5.912	3.743	2.085	2.09	102.747	101.684
1segFH_A.pdb	22	46	A	5.132	3.565	2.084	2.08	104.582	100.909
1segFH_A.pdb	26	48	A	5.45	3.779	2.02	2.02	104.67	108.737
1gaiFH_A.pdb	210	213	A	5.241	3.637	2.03	2.03	104.753	105.161
1gaiFH_A.pdb	222	449	A	5.465	3.789	2.018	2.02	104.318	105.635
1gaiFH_A.pdb	262	270	A	4.806	3.997	2.04	2.04	103.133	106.331
7rsaFH_A.pdb	26	84	A	5.611	3.664	2	2	103.47	104.801
7rsaFH_A.pdb	40	95	A	5.488	3.683	2.013	2.01	100.956	106.273
7rsaFH_A.pdb	58	110	A	5.989	3.785	1.978	1.98	108.712	104.813
7rsaFH_A.pdb	65	72	A	5.18	4.013	1.971	1.97	102.624	101.768
3dlqFH_I.pdb	89	178	I	4.799	4.017	2.048	2.05	104.405	108.835
3agnFH_A.pdb	1	54	A	5.696	3.564	2.059	2.02	106.295	104.431
3agnFH_A.pdb	9	113	A	4.301	3.995	2.05	2.05	103.482	103.871
3agnFH_A.pdb	55	96	A	4.528	3.888	2.041	2.03	105.318	104.069
2gh0FH_D.pdb	123	188	D	5.504	3.657	2.055	2.06	105.206	104.345
2gh0FH_D.pdb	150	216	D	5.71	3.735	2.007	2.01	102.994	106.498
2gh0FH_D.pdb	154	218	D	5.791	3.635	2.057	2.06	98.197	102.747
1i0vFH_A.pdb	2	10	A	5.284	4.027	2.025	2.03	103.384	102.823
1i0vFH_A.pdb	6	103	A	4.5	4.007	2.023	2.02	104.423	104.267
1ju2FH_A.pdb	399	450	A	6.377	3.931	2.038	2.04	106.045	102.951
1pamFH_B.pdb	43	50	B	4.997	3.548	2.016	2.02	102.368	102.953
2vluFH_A.pdb	46	49	A	5.258	3.66	3.115	2.03	77.975	101.995
2wuhFH_A.pdb	30	185	A	4.982	3.879	2.028	2.03	103.748	104.677
2wuhFH_A.pdb	73	177	A	4.099	4.028	2.036	2.04	104.791	105.893
1gesFH_B.pdb	42	47	B	4.613	4.136	2.009	2.01	101.237	96.661
1pa2FH_A.pdb	11	91	A	5.644	3.501	2.034	2.03	105.515	107.757
1pa2FH_A.pdb	44	49	A	3.9	4.18	2.055	2.06	103.843	105.274
1pa2FH_A.pdb	97	299	A	5.766	3.873	2.065	2.07	101.724	104.534
1pa2FH_A.pdb	176	208	A	5.647	3.676	2.001	2	104.323	105.504
2wq9FH_A.pdb	4	160	A	5.954	3.873	2.035	2.03	104.363	103.541
2wq9FH_A.pdb	70	174	A	5.676	3.731	2.039	2.04	104.585	104.187
2wq9FH_A.pdb	120	129	A	5.845	3.962	2.054	2.05	102.065	103.668
3aprFH_E.pdb	48	51	E	5.779	3.693	2.019	2.02	101.288	105.387
3aprFH_E.pdb	252	285	E	5.25	4.021	2.04	2.04	103.49	104.001
3holFH_A.pdb	351	352	A	2.984	3.87	2.003	2	103.582	102.405
1enfFH_A.pdb	82	92	A	5.534	3.677	2.037	2.04	101.169	106.766
3l9sFH_A.pdb	30	33	A	5.228	3.727	3.352	2.04	77.487	92.042
1wq8FH_A.pdb	14	56	A	5.392	3.71	2.047	2.05	103.771	104.084
1wq8FH_A.pdb	45	91	A	5.817	3.71	2.021	2.02	102.863	101.847
1wq8FH_A.pdb	49	93	A	5.957	3.775	2.031	2.03	101.492	102.342
1y43FH_B.pdb	6	30	B	4.126	4.088	2.026	2.03	103.778	104.572
1y43FH_B.pdb	18	101	B	5.961	3.582	2.032	2.03	103.505	103.599
2ibpFH_B.pdb	19	394	B	5.714	3.63	2.067	2.07	105.963	101.316
3lo8FH_A.pdb	54	139	A	5.955	4.256	3.285	2.28	79.801	84.379
2uuyFH_B.pdb	24	51	B	5.691	3.729	2.051	2.05	103.3	105.484
2uuyFH_B.pdb	38	58	B	5.591	4.127	2.07	2.07	106.208	102.918
2uuyFH_B.pdb	47	73	B	5.399	3.563	2.05	2.05	104.536	102.309
2uuyFH_B.pdb	52	69	B	6.226	3.839	2.044	2.04	103.845	103.337
1t2hFH_B.pdb	7	96	B	4.925	3.932	2.034	2.03	105.043	104.754
3cuiFH_A.pdb	167	199	A	4.403	3.943	2.042	2.04	107.304	107.561
3cuiFH_A.pdb	261	267	A	5.297	3.981	2.084	2.08	104.445	103.615
1dqgFH_A.pdb	16	30	A	4.99	3.908	2.031	2.03	105.836	101.537
1dqgFH_A.pdb	55	72	A	5.061	3.998	2.043	2.04	105.587	104.437
1dqgFH_A.pdb	83	130	A	6.249	3.99	2.048	2.05	103.163	103.722
3fv3FH_G.pdb	47	53	G	5.607	3.756	2.057	2.06	103.911	106.494
3fv3FH_G.pdb	258	292	G	5.386	4.203	2.062	2.06	107.126	103.886
2erfFH_A.pdb	153	214	A	5.522	3.783	2.041	2.04	105.789	106.917
1w4vFH_B.pdb	31	34	B	5.486	3.94	2.116	2.12	104.807	108.011
1u53FH_A.pdb	2	52	A	5.258	3.739	2.012	2.01	106.956	104.336
1u53FH_A.pdb	65	148	A	5.701	3.655	2.069	2.07	101.408	100.143
1u53FH_A.pdb	143	156	A	3.967	4.039	2.089	2.09	102.668	104.476
1u53FH_A.pdb	176	182	A	5.722	3.571	2.03	2.03	98.64	100.245
1u53FH_A.pdb	179	189	A	5.796	3.871	2.05	2.05	103.06	104.497
2w39FH_A.pdb	96	269	A	5.832	3.747	2.09	2.09	102.251	102.459
2w39FH_A.pdb	138	236	A	4.195	3.867	2.044	2.04	104.152	105.159
2w39FH_A.pdb	155	165	A	4.236	3.857	2.041	2.04	105.374	104.397
2w39FH_A.pdb	254	273	A	5.734	3.812	2.065	2.07	103.131	103.5
2w8xFH_A.pdb	13	28	A	5.789	3.847	2.045	2.05	102.271	103.705
2w8xFH_A.pdb	20	60	A	5.679	3.787	2.065	2.06	107.491	102.956
2w8xFH_A.pdb	26	73	A	5.613	3.954	2.088	2.09	107.429	103.84
2w8xFH_A.pdb	51	69	A	6.035	3.763	2.074	2.07	103.971	101.241
3m5qFH_A.pdb	3	15	A	5.521	4.401	3.373	2.16	97.045	83.622
3m5qFH_A.pdb	14	289	A	5.51	4.351	3.252	2.06	89.726	94.311
3m5qFH_A.pdb	33	117	A	4.877	3.777	2.08	2.08	106.092	103.054
3m5qFH_A.pdb	253	319	A	4.978	4.26	5.115	2.12	12.625	111.568
3m5qFH_A.pdb	341	348	A	6.072	3.827	2.049	2.05	101.283	103.796
1x3xFH_B.pdb	1	77	B	4.736	3.867	2.028	2.03	103.06	105.434
2ad6FH_D.pdb	6	12	D	3.733	3.808	2.03	2.03	103.742	103.548
1n12FH_A.pdb	15	48	A	4.32	4.001	2.038	2.04	102.385	104.896
1qazFH_A.pdb	49	112	A	6.123	3.769	2.01	2.01	103.397	107.101
1qazFH_A.pdb	188	189	A	3.72	4.256	2.031	2.03	111.529	110.875
1qfvFH_B.pdb	48	169	B	5.656	3.701	2.037	2.04	102.683	103.655
1qfvFH_B.pdb	119	148	B	6.331	3.713	2.056	2.06	104.104	101.635
1astFH_A.pdb	42	198	A	6.273	3.478	2.024	2.02	103.415	97.385
1astFH_A.pdb	64	84	A	5.697	3.819	2.022	2.02	104.318	103.415
3hhsFH_A.pdb	586	630	A	5.779	4.054	2.076	2.08	110.788	107.295
3hhsFH_A.pdb	588	637	A	6.145	3.899	2.071	2.07	104.881	103.884
2wbfFH_X.pdb	567	572	X	3.787	3.971	2.025	2.02	108.2	108.566
2wbfFH_X.pdb	581	610	X	5.507	3.456	2.038	2.04	104.092	103.521
2wbfFH_X.pdb	593	636	X	4.395	3.903	2.05	2.05	105.447	104.623
2wbfFH_X.pdb	627	672	X	4.851	3.849	2.046	2.05	102.927	103.519
2wbfFH_X.pdb	755	809	X	5.292	3.661	2.021	2.02	102.593	106.969
2fp1FH_A.pdb	160	193	A	5.626	3.637	2.101	2.1	101.257	104.687
2cg1FH_A.pdb	317	343	A	6.717	3.98	2.04	2.04	105.572	104.477
1gvzFH_A.pdb	22	157	A	5.285	4.079	2.034	2.02	101.346	111.871
1gvzFH_A.pdb	22	157	A	5.285	4.079	2.034	2.03	101.346	111.871
1gvzFH_A.pdb	42	58	A	6.516	4.232	2.023	2.12	106.26	109.393
1gvzFH_A.pdb	42	58	A	6.516	4.232	2.023	2.02	106.26	109.393
1gvzFH_A.pdb	136	201	A	3.983	4.255	3.591	2.3	133.693	67.619
1gvzFH_A.pdb	168	182	A	5.707	3.741	2.039	2.04	105.34	106.262
1gvzFH_A.pdb	191	220	A	4.462	4.36	2.441	2.44	101.249	107.129
1rjcFH_A.pdb	22	96	A	6.714	3.566	2.046	2.01	111.688	111.624
1rjcFH_A.pdb	33	108	A	5.881	3.679	2.027	2.03	101.67	102.315
1kopFH_A.pdb	28	181	A	5.131	3.907	2.028	2.03	104.062	104.418
1z6oFH_M.pdb	21	130	M	4.474	3.839	2.031	2.03	104.31	103.334
2fr2FH_A.pdb	74	78	A	5.816	4.371	2.833	2.83	114.412	108.126
3hi7FH_B.pdb	177	181	B	4.871	3.907	2.063	2.06	105.169	104.547
3hi7FH_B.pdb	391	417	B	6.839	3.881	2.045	2.05	105.662	106.557
1y9zFH_B.pdb	27	117	B	5.754	3.51	2.035	2.04	101.953	102.958
1y9zFH_B.pdb	260	269	B	4	3.813	2.034	2.03	104.943	106.375
1y9zFH_B.pdb	277	298	B	5.935	3.593	2.03	2.03	102.807	103.31
1y9zFH_B.pdb	389	432	B	5.381	3.79	2.033	2.03	105.18	104.109
1g4iFH_A.pdb	11	77	A	5.973	3.733	2.033	2.03	101.519	102.683
1g4iFH_A.pdb	27	123	A	5.522	3.656	2.021	2.02	101.22	101.974
1g4iFH_A.pdb	29	45	A	4.996	3.827	2.026	2.03	102.858	102.666
1g4iFH_A.pdb	44	105	A	5.794	3.693	2.031	2.03	103.555	105.325
1g4iFH_A.pdb	51	98	A	5.72	3.65	2.028	2.03	104.546	102.412
1g4iFH_A.pdb	61	91	A	4.913	3.98	2.042	2.04	103.106	103.05
1g4iFH_A.pdb	84	96	A	6.042	3.878	2.036	2.04	100.775	104.727
1yalFH_A.pdb	22	63	A	4.506	3.856	2.019	2.02	104.792	103.78
1yalFH_A.pdb	56	95	A	4.739	3.882	2.033	2.03	103.667	102.862
1yalFH_A.pdb	153	204	A	5.248	3.9	2.041	2.04	105.337	105.482
1m40FH_A.pdb	77	123	A	6.047	4.004	2.073	2.07	102.183	100.881
1kzqFH_A.pdb	12	122	A	5.866	3.583	2.027	2.03	102.052	101.975
1kzqFH_A.pdb	34	113	A	5.594	3.637	2.022	2.02	102.858	102.48
1kzqFH_A.pdb	54	62	A	5.727	3.675	2.058	2.06	104.447	104.16
1kzqFH_A.pdb	142	247	A	5.93	3.492	2.049	2.05	101.846	100.202
1kzqFH_A.pdb	167	237	A	5.542	3.767	2.048	2.05	105.332	103.818
1kzqFH_A.pdb	182	190	A	4.402	3.854	2.044	2.04	104.45	104.677
1ikpFH_A.pdb	11	15	A	4.794	3.961	2.048	2.05	105.924	107.605
1ikpFH_A.pdb	197	214	A	6.063	3.722	2.045	2.05	100.741	102.912
1ikpFH_A.pdb	265	287	A	5.921	3.757	2.031	2.03	102.293	104.273
1ikpFH_A.pdb	372	379	A	5.882	3.642	2.038	2.04	100.295	101.924
1ryoFH_A.pdb	9	48	A	5.856	3.731	2.037	2.04	104.668	102.732
1ryoFH_A.pdb	19	39	A	6.119	3.881	2.036	2.04	103.056	103.869
1ryoFH_A.pdb	118	194	A	6.085	3.603	2.037	2.04	103.739	102.247
1ryoFH_A.pdb	158	174	A	5.247	3.837	2.034	2.03	103.506	102.297
1ryoFH_A.pdb	161	179	A	4.449	3.796	2.029	2.03	105.899	103.772
1ryoFH_A.pdb	171	177	A	5.085	4.036	2.027	2.03	104.03	104.771
1ryoFH_A.pdb	227	241	A	4.63	3.981	2.033	2.03	105.573	105.217
3p2tFH_A.pdb	26	75	A	6.548	3.804	2.034	2.03	103.885	101.864
3p2tFH_A.pdb	121	172	A	6.39	3.827	2.047	2.05	105.094	104.696
3p2tFH_A.pdb	133	143	A	5.227	4.022	2.042	2.04	103.583	98.731
2frgFH_P.pdb	38	104	P	6.529	3.546	2.051	2.05	103.713	103.821
2frgFH_P.pdb	52	59	P	5.335	3.874	2.045	2.05	104.306	104.912
2z2fFH_A.pdb	6	127	A	5.063	3.625	2.04	2.04	103.266	104.879
2z2fFH_A.pdb	30	115	A	6.081	3.86	2.056	2.06	103.159	102.947
2z2fFH_A.pdb	65	81	A	4.895	3.914	2.059	2.06	103.074	105.826
2z2fFH_A.pdb	77	95	A	5.5	3.73	2.044	2.04	103.183	105.386
1dlfFH_L.pdb	23	88	L	6.504	3.656	2.047	2.05	105.135	100.681
2zs0FH_D.pdb	3	133	D	4.756	3.995	2.043	2.04	106.758	104.705
3p73FH_B.pdb	25	80	B	6.18	3.619	2.032	2.03	101.988	101.841
1so7FH_A.pdb	88	164	A	6.16	5.522	2.742	2.74	115.289	133.14
3k1wFH_B.pdb	51	58	B	6.39	3.67	2.026	2.03	102.51	106.283
3k1wFH_B.pdb	217	221	B	5.696	4.225	2.048	2.05	110.498	110.896
3k1wFH_B.pdb	259	296	B	4.992	4.176	2.047	2.05	106.552	111.158
1ga6FH_A.pdb	137	176	A	4.83	3.955	2.074	2.07	105.31	102.757
2gc4FH_B.pdb	23	88	B	5.474	3.815	2.029	2.03	104.584	105.074
2gc4FH_B.pdb	29	61	B	5.747	3.802	2.033	2.03	104.996	104.54
2gc4FH_B.pdb	36	121	B	4.986	3.932	2.032	2.03	104.388	104.519
2gc4FH_B.pdb	38	86	B	6.28	3.724	2.032	2.03	102.808	102.537
2gc4FH_B.pdb	46	77	B	5.636	3.798	2.029	2.03	102.674	104.174
2gc4FH_B.pdb	78	109	B	6.151	3.897	2.027	2.03	104.191	102.723
2ra4FH_A.pdb	11	35	A	5.706	4.006	2.103	2.1	107.04	107.764
2ra4FH_A.pdb	12	51	A	5.841	3.733	2.175	2.18	100.939	103.361
1t8tFH_B.pdb	351	363	B	4.456	3.907	2.032	2.03	104.184	103.652
3b4nFH_A.pdb	121	134	A	5.842	3.813	2.029	2.03	105.496	103.021
3b4nFH_A.pdb	143	193	A	5.95	3.907	2.025	2.03	104.151	105.152
3b4nFH_A.pdb	177	182	A	5.802	3.644	2.059	2.06	103.735	102.533
3b4nFH_A.pdb	254	257	A	5.822	3.865	2.028	2.03	102.896	103.849
3b4nFH_A.pdb	309	334	A	5.902	3.679	2.045	2.05	103.904	102.152
2id4FH_A.pdb	377	230	A	5.653	4.012	2.04	2.04	105.305	104.742
2id4FH_A.pdb	352	322	A	5.165	3.989	2.055	2.06	104.323	103.708
1y9lFH_A.pdb	69	95	A	6.511	3.684	2.055	2.06	103.689	103.066
2vn4FH_A.pdb	19	26	A	4.4	4.101	2.009	2.01	103.507	108.412
2vn4FH_A.pdb	222	453	A	6.186	3.481	1.995	2.03	101.826	101.909
2vn4FH_A.pdb	266	274	A	4.958	4.071	2.047	2.05	106.254	105.505
2vn4FH_A.pdb	491	587	A	5.141	3.899	2.016	2.02	103.492	105.182
1krnFH_A.pdb	66	143	A	5.065	3.873	2.018	2.02	101.491	106.412
1krnFH_A.pdb	87	126	A	5.641	3.551	1.993	1.99	108.163	103.6
1krnFH_A.pdb	115	138	A	6.056	3.605	2.025	1.97	96.266	97.278
2xttFH_B.pdb	22	157	B	5.198	4.096	2.05	2.05	103.497	105.226
2xttFH_B.pdb	42	58	B	6.296	3.73	2.041	2.04	101.916	105.185
2xttFH_B.pdb	128	232	B	5.139	3.891	2.027	2.03	101.936	105.563
2xttFH_B.pdb	136	201	B	4.335	4.093	2.029	2.03	106.39	108.679
2xttFH_B.pdb	168	182	B	5.457	3.512	2.042	2.04	102.33	104.984
2xttFH_B.pdb	191	220	B	5.394	3.653	2.041	2.04	102.814	101.072
2pi6FH_A.pdb	5	30	A	6.279	3.824	2.041	2.04	103.281	102.848
2pi6FH_A.pdb	279	343	A	5.09	3.851	2.039	2.04	103.007	103.429
2qf9FH_A.pdb	168	172	A	4.773	4.243	2.064	2.06	105.943	103.238
3a3dFH_B.pdb	166	180	B	5.406	4.023	2.087	2.09	103.323	105.588
3a3dFH_B.pdb	222	239	B	5.366	4.363	2.122	2.12	104.457	112.97
1xwtFH_A.pdb	324	339	A	5.596	3.596	2.063	2.06	102.658	103.504
2ra6FH_B.pdb	73	166	B	5.9	3.801	2.031	2.03	103.815	103.504
3g7wFH_A.pdb	372	377	A	4.954	3.962	2.045	2.05	105.466	100.97
2vxtFH_L.pdb	23	88	L	6.652	3.789	2.008	2.01	105.052	105.834
2vxtFH_L.pdb	134	194	L	6.395	3.642	2.005	2.01	104.248	104.393
2igxFH_A.pdb	47	52	A	6.14	3.8	2.04	2.04	106.167	103.917
2igxFH_A.pdb	249	285	A	5.223	4.3	2.057	2.06	112.545	112.629
3mk1FH_A.pdb	121	183	A	6.065	3.962	2.038	2.04	102.341	104.32
3mk1FH_A.pdb	467	474	A	5.281	3.787	2.027	2.03	103.368	103.667
1zu3FH_A.pdb	12	63	A	4.509	3.936	2.048	2.05	103.683	107.76
1zu3FH_A.pdb	16	36	A	5.866	3.819	2.039	2.04	106.209	103.385
1zu3FH_A.pdb	22	46	A	5.166	3.633	2.063	2.06	104.055	103.411
1zu3FH_A.pdb	26	48	A	5.458	3.666	2.03	2.03	103.918	104.842
2qqiFH_A.pdb	275	424	A	5.151	3.952	2.032	2.03	103.272	105.736
2qqiFH_A.pdb	431	583	A	4.999	3.925	2.027	2.03	106.3	103.999
3e6jFH_A.pdb	22	28	A	5.694	3.602	2.082	2.08	103.27	102.65
3e6jFH_A.pdb	26	35	A	4.209	4.089	2.125	2.13	106.012	103.019
3e6jFH_A.pdb	129	130	A	3.709	4.091	2.976	2.98	95.532	88
3e6jFH_A.pdb	182	217	A	5.552	3.674	2.094	2.09	97.992	103.934
3e6jFH_A.pdb	184	237	A	4.954	4.129	2.126	2.13	109.04	101.569
1agyFH_A.pdb	31	109	A	5.77	3.708	2.067	2.07	102.647	100.763
1agyFH_A.pdb	171	178	A	6.036	3.648	2.025	2.03	103.556	101.406
3cbwFH_B.pdb	92	112	B	6.807	3.948	2.15	2.15	104.048	102.266
3gmvFH_X.pdb	31	43	X	4.009	4.007	2.049	2.05	102.828	105.894
3gmvFH_X.pdb	106	128	X	3.882	3.97	2.031	2.03	102.18	104.947
1d5lFH_D.pdb	115	125	D	5.189	3.76	2.018	2.02	105.728	104.811
1d5lFH_D.pdb	119	143	D	5.803	3.789	2.038	2.04	103.062	104.775
1d5lFH_D.pdb	221	232	D	5.191	3.993	2.016	2.02	103.468	105.361
1d5lFH_D.pdb	440	497	D	6.124	3.688	2.027	2.03	100.866	102.311
1d5lFH_D.pdb	538	564	D	5.762	3.657	2.027	2.03	103.701	101.616
2xdgFH_A.pdb	41	64	A	5.647	3.659	2.088	2.09	102.903	101.227
2xdgFH_A.pdb	55	96	A	5.784	3.846	2.073	2.07	101.391	104.28
2xdgFH_A.pdb	78	112	A	5.857	3.871	2.059	2.06	103.783	104.021
1z3qFH_A.pdb	9	199	A	4.982	3.838	2.036	2.04	104.42	102.96
1z3qFH_A.pdb	50	60	A	3.873	4.047	2.021	2.02	104.966	104.788
1z3qFH_A.pdb	65	71	A	5.664	3.719	2.033	2.03	105.988	101.893
1z3qFH_A.pdb	116	188	A	5.406	3.998	2.036	2.04	105.649	104.028
1z3qFH_A.pdb	121	171	A	5.185	3.749	2.043	2.04	104.601	104.846
1z3qFH_A.pdb	129	139	A	5.757	3.733	2.03	2.03	104.965	104.365
1z3qFH_A.pdb	143	152	A	4.745	4.112	2.052	2.05	106.987	105.856
1z3qFH_A.pdb	153	158	A	5.513	3.746	2.065	2.07	103.591	104.265
3i09FH_A.pdb	136	394	A	5.741	4.009	2.562	2.56	98.188	104.327
2iw0FH_A.pdb	38	237	A	4.698	4.008	2.112	2.11	105.773	104.101
2iw0FH_A.pdb	148	152	A	5.093	3.898	2.099	2.1	107.184	100.957
1extFH_A.pdb	15	29	A	5.795	3.796	2.032	2.03	102.688	104.366
1extFH_A.pdb	30	43	A	5.659	3.688	2.039	2.04	103.381	104.244
1extFH_A.pdb	33	52	A	5.694	3.66	2.027	2.03	102.168	101.841
1extFH_A.pdb	55	70	A	5.857	3.802	2.028	2.03	103.109	104.565
1extFH_A.pdb	73	88	A	6.149	3.597	2.024	2.02	103.515	102.567
1extFH_A.pdb	76	96	A	5.617	3.869	2.028	2.03	104.642	103.822
1extFH_A.pdb	98	114	A	5.63	3.73	2.026	2.03	103.249	104.311
1extFH_A.pdb	117	129	A	5.962	3.607	2.026	2.03	103.559	103.192
1extFH_A.pdb	120	137	A	5.87	3.818	2.028	2.03	104.468	102.658
1extFH_A.pdb	139	150	A	5.595	3.796	2.032	2.03	103.695	103.837
1extFH_A.pdb	153	166	A	5.626	3.623	2.029	2.03	102.85	102.931
1extFH_A.pdb	156	162	A	5.874	3.889	2.027	2.03	102.952	104.625
3l5eFH_B.pdb	216	420	B	5.761	3.858	2.072	2.07	103.302	104.105
3l5eFH_B.pdb	278	443	B	4.917	3.798	2.039	2.04	105.409	104.165
3l5eFH_B.pdb	330	380	B	4.078	4.038	2.047	2.05	105.785	104.138
2cj4FH_A.pdb	11	20	A	5.456	3.582	2.478	2.48	99.863	96.133
2cj4FH_A.pdb	76	117	A	4.983	4.053	2.079	2.08	103.323	109.062
2wduFH_B.pdb	26	196	B	5.99	4.493	3.14	2.06	77.435	93.354
3nggFH_B.pdb	10	35	B	5.957	3.691	2.072	2.07	101.75	101.778
3nggFH_B.pdb	18	39	B	5.402	3.763	2.004	2	101.661	105.104
3nggFH_B.pdb	22	34	B	5.9	3.751	2.094	2.09	101.636	102.17
3nggFH_B.pdb	28	43	B	5.664	3.762	2.105	2.11	102.937	103.75
3powFH_A.pdb	105	137	A	3.983	4.134	2.548	2.55	100.482	102.384
1atzFH_B.pdb	923	1109	B	5.862	3.671	2.032	2.03	102.888	101.654
2xlaFH_A.pdb	94	296	A	4.139	4.152	2.051	2.05	105.578	105.859
2zouFH_B.pdb	44	128	B	4.302	3.81	2.062	2.06	105.329	105.945
2zouFH_B.pdb	156	182	B	4.059	4.171	2.073	2.07	106.296	106.149
2ri9FH_A.pdb	1332	1361	A	6.353	3.934	2.055	2.06	101.404	106.624
3f4sFH_A.pdb	51	54	A	5.047	3.277	2.027	2.03	93.168	103.451
3f4sFH_A.pdb	97	146	A	6.001	3.972	2.03	2.03	106.207	102.476
2erwFH_A.pdb	8	27	A	5.687	3.691	2.046	2.05	104.957	103.89
2erwFH_A.pdb	16	48	A	4.652	3.982	2.035	2.04	103.504	105.995
3h7oFH_B.pdb	29	45	B	6.615	3.803	2.039	2.04	104.5	103.122
3h7oFH_B.pdb	156	171	B	6.489	3.522	2.033	2.03	102.452	103.533
1senFH_A.pdb	66	69	A	5.186	3.718	2.381	2.38	95.538	103.845
2x8hFH_A.pdb	154	159	A	4.659	4.504	3.197	2.21	82.991	89.82
3bfqFH_G.pdb	16	54	G	4.111	4.117	2.059	2.06	105.539	102.885
3cqlFH_A.pdb	23	85	A	4.851	3.989	2.054	2.05	103.394	103.741
3cqlFH_A.pdb	97	105	A	5.937	3.953	2.02	2.02	102.764	101.553
3cqlFH_A.pdb	204	236	A	5.059	3.653	2.052	2.05	106.182	101.762
2ad6FH_A.pdb	103	104	A	3.709	4.252	2.051	2.05	107.851	110.239
2ad6FH_A.pdb	144	167	A	5.982	3.873	2.027	2.03	104.293	103.19
2ad6FH_A.pdb	379	408	A	4.51	4.041	2.034	2.03	105.549	104.724
2apxFH_A.pdb	23	92	A	6.269	3.535	2.076	2.08	101.973	104.38
2fcbFH_A.pdb	31	73	A	6.312	3.841	2.038	2.04	101.913	104.677
2fcbFH_A.pdb	112	156	A	6.162	3.768	2.048	2.05	104.474	105.534
1rgxFH_C.pdb	35	88	C	4.064	4.121	2.028	2.03	107.024	104.572
1rgxFH_C.pdb	47	87	C	5.636	3.76	2.029	2.03	105.13	104.306
1rgxFH_C.pdb	56	73	C	5.825	3.696	2.026	2.03	103.906	103.264
1rgxFH_C.pdb	58	75	C	5.911	3.789	2.026	2.03	102.558	102.461
1rgxFH_C.pdb	62	77	C	6.126	3.706	2.027	2.03	105.576	104.989
3fprFH_D.pdb	12	33	D	6.005	3.822	2.037	2.04	102.211	103.605
3fprFH_D.pdb	29	70	D	5.681	3.729	2.03	2.03	103.721	103.528
3fprFH_D.pdb	46	75	D	6.09	3.89	2.009	2.01	105.649	102.874
3fprFH_D.pdb	65	84	D	5.788	3.799	2.006	2.01	104.334	104.084
3czfFH_B.pdb	25	80	B	6.359	3.829	2.107	2.11	101.458	110.866
1shuFH_X.pdb	39	218	X	4.827	3.975	2.064	2.06	106.836	105.994
1z3eFH_A.pdb	10	13	A	5.276	3.701	2.063	2.06	104.087	102.945
2v33FH_B.pdb	301	376	B	5.207	3.988	2.048	2.05	101.827	103.366
2v33FH_B.pdb	306	380	B	4.834	3.88	2.046	2.05	108.218	102.908
2v33FH_B.pdb	306	380	B	4.834	3.88	2.046	2.03	108.218	102.908
2v33FH_B.pdb	328	370	B	4.703	3.875	2.032	2.03	101.869	105.69
3bwsFH_B.pdb	346	347	B	3.743	4.179	2.064	2.06	108.177	103.35
1lqvFH_A.pdb	101	169	A	6.153	3.789	2.057	2.06	102.79	105.999
1m9zFH_A.pdb	28	61	A	5.265	3.714	2.038	2.04	103.095	104.303
1m9zFH_A.pdb	31	48	A	5.901	3.851	2.038	2.04	104.55	103.95
1m9zFH_A.pdb	38	44	A	5.96	3.628	2.023	2.02	104.996	101.847
1m9zFH_A.pdb	54	78	A	5.722	3.711	2.039	2.04	105.967	103.36
1m9zFH_A.pdb	98	113	A	5.153	3.94	2.054	2.05	103.893	104.056
1m9zFH_A.pdb	115	120	A	6.209	3.872	2.048	2.05	101.335	102.513
1x9uFH_A.pdb	57	91	A	5.867	3.712	2.04	2.04	101.877	101.48
3fd7FH_B.pdb	19	68	B	5.671	3.732	2.064	2.06	105.357	101.993
3fd7FH_B.pdb	30	75	B	4.838	3.606	2.038	2.04	102.931	104.899
3fd7FH_B.pdb	48	90	B	5.35	3.565	2.035	2.04	103.271	103.184
3grhFH_A.pdb	157	169	A	5.971	4.068	2.951	2.95	87.774	94.973
2vqgFH_D.pdb	22	81	D	5.294	3.476	2.053	2.05	102.278	102.955
2ahnFH_A.pdb	9	221	A	4.912	3.802	2.054	2.05	102.167	103.663
2ahnFH_A.pdb	57	67	A	3.939	4.068	2.048	2.05	104.197	103.727
2ahnFH_A.pdb	72	79	A	5.702	3.614	2.111	2.11	101.997	98.997
2ahnFH_A.pdb	127	210	A	4.487	3.755	2.044	2.04	104.703	103.953
2ahnFH_A.pdb	132	193	A	4.853	3.569	2.048	2.05	107.603	103.029
2ahnFH_A.pdb	140	156	A	5.924	3.742	2.059	2.06	102.713	101.696
2ahnFH_A.pdb	160	169	A	4.729	4.012	2.107	2.11	102.738	103.373
2ahnFH_A.pdb	170	180	A	5.496	3.633	2.05	2.05	104.554	105.209
1rtqFH_A.pdb	223	227	A	6.284	3.528	2.074	2.07	102.634	104.662
3mm5FH_B.pdb	211	251	B	5.16	3.785	2.035	2.04	103.403	104.16
2dhoFH_A.pdb	21	39	A	6.971	4.143	2.036	2.04	106.77	103.676
1m8sFH_A.pdb	27	126	A	5.806	3.81	2.032	2.03	103.523	104.556
1m8sFH_A.pdb	29	45	A	5.065	3.908	2.034	2.03	104.52	104.908
1m8sFH_A.pdb	44	105	A	5.804	3.705	2.025	2.03	104.046	103.442
1m8sFH_A.pdb	50	134	A	5.792	3.758	2.033	2.03	103.18	104.074
1m8sFH_A.pdb	51	98	A	5.786	3.74	2.027	2.03	103.083	103.921
1m8sFH_A.pdb	61	91	A	6.09	3.869	2.027	2.03	104.612	104.775
1m8sFH_A.pdb	84	96	A	5.893	3.654	2.025	2.03	102.768	102.114
3ajdFH_A.pdb	91	186	A	6.514	3.772	2.01	2.01	103.739	104.938
3ajdFH_A.pdb	166	212	A	5.605	4.083	2.044	2.04	104.729	105.247
2wcjFH_A.pdb	19	54	A	5.914	3.61	2.009	2.01	99.007	104.65
2wcjFH_A.pdb	50	108	A	4.696	4.195	2.056	2.06	110.409	101.158
2wcjFH_A.pdb	97	117	A	5.818	3.682	2.141	2.14	100.501	104.24
1bxoFH_A.pdb	249	283	A	5.111	4.099	2.068	2.07	102.396	109.476
2x5xFH_A.pdb	3	11	A	5.213	4.118	2.068	2.07	105.448	104.454
2x5xFH_A.pdb	36	85	A	5.907	3.937	2.085	2.09	109.415	104.58
2x5xFH_A.pdb	171	184	A	5.122	3.49	2.122	2.12	101.928	101.328
2x5xFH_A.pdb	246	255	A	5.542	4.155	2.11	2.09	96.182	100.958
2x5xFH_A.pdb	325	330	A	5.055	4.012	2.149	2.15	102.125	102.634
3bkjFH_H.pdb	22	92	H	6.175	3.498	2.034	2.03	104.094	100.355
3bkjFH_H.pdb	140	195	H	6.303	3.599	2.002	2	102.12	104.096
3hh7FH_A.pdb	3	24	A	5.43	3.695	2.023	2.02	103.519	103.345
3hh7FH_A.pdb	17	41	A	5.583	3.754	2.033	2.03	105.585	103.335
3hh7FH_A.pdb	45	57	A	5.905	3.875	2.028	2.03	104.232	106.178
3hh7FH_A.pdb	58	63	A	6.158	3.795	2.041	2.04	101.919	103.826
1spjFH_A.pdb	22	157	A	5.085	4.009	2.03	2.03	103.492	105.897
1spjFH_A.pdb	42	58	A	6.511	3.894	2.037	2.04	102.975	105.397
1spjFH_A.pdb	136	201	A	4.267	3.962	2.027	2.03	104.154	105.975
1spjFH_A.pdb	168	182	A	5.727	3.796	2.046	2.05	104.536	101.99
1spjFH_A.pdb	191	220	A	5.563	3.722	2.041	2.04	105.36	102.974
1ukmFH_A.pdb	4	15	A	5.672	3.776	2.024	2.02	103.09	102.326
1ukmFH_A.pdb	32	129	A	5.325	3.754	2.036	2.04	104.333	104.545
1ukmFH_A.pdb	104	121	A	5.137	3.969	2.034	2.03	104.709	102.97
1v0wFH_A.pdb	55	61	A	5.225	4.009	2.025	2.02	105.478	106.209
1v0wFH_A.pdb	227	246	A	5.842	3.855	2.041	2.04	106.957	106.114
1v0wFH_A.pdb	301	348	A	6.112	3.804	2.024	2.02	105.787	105.234
1v0wFH_A.pdb	423	512	A	5.554	3.659	2.011	2.01	105.178	103.651
2zpoFH_A.pdb	26	81	A	5.61	3.631	2.058	2.06	102.972	102.016
2zpoFH_A.pdb	40	92	A	5.47	3.737	2.062	2.06	102.82	104.157
2zpoFH_A.pdb	58	107	A	5.731	3.649	2.068	2.07	103.038	103.155
1j71FH_A.pdb	47	59	A	5.668	3.817	2.035	2.04	105.669	105.563
1j71FH_A.pdb	254	287	A	5.23	3.912	2.027	2.03	102.728	104.632
3lwkFH_A.pdb	99	166	A	5.835	3.789	2.125	2.13	104.848	108.757
1jaeFH_A.pdb	28	84	A	5.243	3.85	2.022	2.02	105.198	103.172
1jaeFH_A.pdb	134	148	A	4.84	3.921	2.036	2.04	104.944	103.77
1jaeFH_A.pdb	354	360	A	6.079	3.776	2.03	2.03	101.976	103.468
1jaeFH_A.pdb	425	437	A	5.056	3.636	2.026	2.03	104.442	104.702
3ia1FH_B.pdb	56	59	B	5.372	3.817	2.767	2.77	91.847	101.52
3fz4FH_A.pdb	10	13	A	5.271	3.644	2.219	2.22	103.905	102.217
1k07FH_A.pdb	256	290	A	6.366	3.746	2.046	2.05	103.215	101.859
2owsFH_A.pdb	135	191	A	5.932	4.014	2.072	2.07	103.297	103.17
1mo9FH_A.pdb	82	87	A	4.518	4.321	2.051	2.05	105.806	104.01
1lmlFH_A.pdb	125	142	A	5.713	3.584	2.028	2.03	102.33	102.977
1lmlFH_A.pdb	191	230	A	5.919	3.788	2.029	2.03	103.549	102.823
1lmlFH_A.pdb	314	386	A	5.042	4.008	2.028	2.03	103.211	103.977
1lmlFH_A.pdb	393	455	A	6.385	3.917	2.026	2.03	103.242	103.429
1lmlFH_A.pdb	406	425	A	6.072	3.86	2.031	2.03	103.77	102.693
1lmlFH_A.pdb	415	489	A	5.592	3.675	2.028	2.03	103.383	103.779
1lmlFH_A.pdb	466	510	A	5.392	3.608	2.028	2.03	103.961	104.422
1lmlFH_A.pdb	515	565	A	5.92	3.784	2.026	2.03	103.307	102.283
1lmlFH_A.pdb	535	558	A	5.463	3.775	2.026	2.03	105.063	103.906
1b12FH_B.pdb	170	176	B	4.8	3.691	2.031	2.03	102.976	99.37
1t0pFH_B.pdb	24	67	B	6.439	3.696	2.023	2.02	104.856	104.341
1t0pFH_B.pdb	28	71	B	6.055	3.893	2.033	2.03	104.574	103.824
3iq3FH_A.pdb	26	115	A	5.697	3.63	2.017	2.02	101.245	102.044
3iq3FH_A.pdb	28	44	A	4.865	3.698	2.008	2.01	105.753	101.376
3iq3FH_A.pdb	43	95	A	5.555	3.543	2.033	2.03	104.463	103.803
3iq3FH_A.pdb	49	121	A	5.33	3.504	2.001	2	103.059	101.808
3iq3FH_A.pdb	50	88	A	5.68	3.675	2.018	2.02	105.009	105.416
3iq3FH_A.pdb	57	81	A	5.707	3.59	2.024	2.02	106.173	102.696
3iq3FH_A.pdb	75	86	A	5.712	3.501	2.044	2.04	99.239	100.673
1x6xFH_X.pdb	129	142	X	4.511	3.83	2.581	2.01	110.069	92.586
3ljkFH_A.pdb	4	317	A	5.747	4.399	3.738	2.11	72.802	75.413
1jm1FH_A.pdb	76	247	A	5.481	3.633	2.187	2.19	105.002	104.052
1jm1FH_A.pdb	145	172	A	6.622	3.969	3.297	2.04	133.908	70.039
1dtdFH_B.pdb	11	34	B	4.053	4.109	2.021	2.02	102.776	104.695
1dtdFH_B.pdb	18	62	B	4.022	3.961	2.03	2.03	104.115	103.817
1dtdFH_B.pdb	19	43	B	6.176	3.96	2.037	2.04	101.742	102.901
1dtdFH_B.pdb	22	58	B	4.011	4.028	2.021	2.02	106.324	105.364
1e4mFH_M.pdb	6	438	M	5.914	4.022	2.366	2.37	102.007	105.756
1e4mFH_M.pdb	14	434	M	5.528	3.675	2.215	2.22	107.447	105.168
1e4mFH_M.pdb	206	214	M	5.812	4.151	2.016	2.02	110.099	107.527
2eboFH_C.pdb	601	608	C	5.007	3.867	2.034	2.03	105.532	104.96
2ga4FH_D.pdb	3	56	D	4.852	3.648	2.059	2.06	104.169	106.269
3lpcFH_A.pdb	89	141	A	5.116	3.749	2.047	2.05	103.898	105.747
3lpcFH_A.pdb	183	220	A	5.181	3.904	2.032	2.03	105.187	105.298
1mexFH_L.pdb	23	88	L	6.529	3.622	2.059	2.06	107.097	102.859
1mexFH_L.pdb	134	194	L	6.547	3.623	2.013	2.04	108.219	103.524
1uaiFH_A.pdb	4	51	A	5.106	3.803	2.03	2.03	103.838	104.493
1uaiFH_A.pdb	200	206	A	5.121	3.807	2.031	2.03	104.612	104.249
1ayeFH_A.pdb	138	161	A	5.201	3.909	1.999	2	101.685	100.165
1ayeFH_A.pdb	210	244	A	5.376	3.629	2.01	2.01	101.653	103.464
3m8oFH_L.pdb	23	93	L	6.507	3.688	2.074	2.07	106.849	100.561
3m8oFH_L.pdb	139	199	L	6.46	3.717	2.009	2.01	104.26	104.343
1thxFH_A.pdb	32	35	A	5.326	3.733	2.037	2.04	103.28	104.406
3djlFH_A.pdb	28	540	A	5.747	3.826	2.089	2.09	100.308	104.408
1ahoFH_A.pdb	12	63	A	5.163	3.828	2.003	2.01	105.57	105.794
1ahoFH_A.pdb	16	36	A	5.863	3.789	2.034	2.03	104.875	103.098
1ahoFH_A.pdb	22	46	A	5.297	3.667	2.027	2.03	105.407	102.831
1ahoFH_A.pdb	26	48	A	5.596	3.69	2.014	2.01	104.381	105.21
2qevFH_A.pdb	6	38	A	5.796	3.507	2.042	2.04	99.999	100.064
2qevFH_A.pdb	19	144	A	5.272	3.828	2.053	2.05	105.233	104.573
2qevFH_A.pdb	77	96	A	5.55	3.578	2.04	2.04	104.007	103.726
3lhnFH_A.pdb	63	66	A	5.238	4.079	2.118	2.12	101.231	104.098
3mi4FH_A.pdb	22	157	A	5.295	4.432	2.386	2.04	98.275	104.065
3mi4FH_A.pdb	42	58	A	6.332	3.702	2.054	2.05	101.241	103.442
3mi4FH_A.pdb	128	232	A	5.287	3.915	2.017	2.02	103.147	107.272
3mi4FH_A.pdb	136	201	A	4.262	4.089	2.03	2.03	106.088	108.299
3mi4FH_A.pdb	168	182	A	5.468	3.584	2.045	2.05	103.695	106.09
3mi4FH_A.pdb	191	220	A	5.377	3.628	2.186	2.02	104.385	103.698
2f9nFH_B.pdb	42	58	B	6.269	3.784	2.055	2.06	103.398	102.394
2f9nFH_B.pdb	136	201	B	4.031	4.033	2.045	2.05	104.97	106.803
2f9nFH_B.pdb	168	182	B	6.505	3.63	2.045	2.05	99.927	100.629
2f9nFH_B.pdb	191	220	B	5.324	3.758	2.046	2.05	102.213	101.715
1x2tFH_C.pdb	2	13	C	5.738	3.785	2.029	2.03	102.325	103.223
1x2tFH_C.pdb	30	127	C	5.336	3.781	2.033	2.03	104.334	105.705
1x2tFH_C.pdb	102	119	C	5.146	3.952	2.032	2.03	103.758	104.005
1hmlFH_A.pdb	6	120	A	5.596	4.127	2.023	2.02	98.967	104.42
1hmlFH_A.pdb	28	111	A	5.906	3.675	2.032	2.03	103.99	101.543
1hmlFH_A.pdb	61	77	A	5.149	3.982	2.027	2.03	102.327	105.45
1hmlFH_A.pdb	73	91	A	5.572	3.778	2.033	2.03	104.495	105.375
2uurFH_A.pdb	21	219	A	5.666	3.695	2.027	2.03	103.306	102.261
2uurFH_A.pdb	175	229	A	6.029	3.885	2.048	2.05	105.432	106.793
3kshFH_A.pdb	68	102	A	6.001	3.774	2.033	2.03	101.27	103.332
3q5yFH_A.pdb	23	92	A	6.385	3.553	2.05	2.05	102.623	104.519
3q5yFH_A.pdb	147	212	A	6.367	3.573	2.025	2.03	101.682	103.207
3ktzFH_A.pdb	44	50	A	5.538	3.715	2.031	2.03	103.67	102.403
2bogFH_X.pdb	80	125	X	6.641	4.235	2.049	2.05	114.717	111.806
2bogFH_X.pdb	232	267	X	5.879	4.143	2.097	2.1	102.476	106.098
3fc0FH_B.pdb	52	72	B	6.198	3.773	2.037	2.04	103.17	104.744
2eq6FH_B.pdb	47	52	B	4.506	4.101	2.042	2.04	107.074	101.631
1f39FH_A.pdb	215	219	A	5.311	4.292	2.958	2.96	107.248	94.679
2iq7FH_A.pdb	26	41	A	5.962	3.77	2.032	2.03	102.545	102.457
2iq7FH_A.pdb	201	217	A	5.861	3.491	2.05	2.05	102.216	102.301
2iq7FH_A.pdb	327	332	A	6.137	3.825	2.051	2.05	103.244	103.298
2iq7FH_A.pdb	351	362	A	6.783	4.003	2.034	2.03	104.618	102.529
1xhnFH_A.pdb	99	111	A	5.365	3.788	2.014	2.01	108.171	102.812
3m7qFH_B.pdb	3	53	B	5.767	3.91	2.042	2.04	104.752	103.621
3m7qFH_B.pdb	12	36	B	5.662	4.006	2.038	2.04	104.375	103.475
3m7qFH_B.pdb	28	49	B	6.142	3.789	2.04	2.04	103.845	103.212
2cjlFH_B.pdb	87	95	B	6.148	4.105	2.048	2.05	103.313	106.916
2cjlFH_B.pdb	183	215	B	4.848	3.708	2.046	2.05	104.821	105.542
2durFH_A.pdb	202	239	A	5.431	4.091	2.043	2.04	105.452	105.469
1ru4FH_A.pdb	28	114	A	5.782	4.125	2.03	2.03	105.156	106.27
3n7oFH_A.pdb	42	58	A	6.421	3.757	2.049	2.05	103.074	104.36
3n7oFH_A.pdb	136	201	A	4.587	4.293	2.042	2.04	109.057	114.683
3n7oFH_A.pdb	168	182	A	5.873	3.82	2.053	2.05	106.762	101.492
2bwlFH_A.pdb	26	80	A	5.685	3.678	2.055	2.06	100.766	103.229
2bwlFH_A.pdb	39	91	A	5.764	3.809	1.991	1.99	105.676	106.191
2bwlFH_A.pdb	57	106	A	5.823	3.723	2.019	2.02	103.348	105.695
3gmfFH_A.pdb	114	184	A	5.995	3.801	3.934	2.05	87.905	65.219
2jjuFH_B.pdb	25	91	B	6.425	3.564	2.045	2.04	104.12	102.25
3k62FH_A.pdb	405	438	A	6.117	3.849	2.04	2.04	125.063	112.639
1bj7FH_A.pdb	44	48	A	4.19	3.787	2.024	2.02	102.725	104.774
1bj7FH_A.pdb	63	154	A	5.74	3.859	2.041	2.04	103.109	104.616
3durFH_B.pdb	22	92	B	6.379	3.517	2.026	2.03	102.521	103.511
1ua6FH_L.pdb	23	88	L	6.595	3.7	2.034	2.03	103.309	101.832
2xc2FH_A.pdb	34	37	A	5.28	3.718	2.22	2.22	103.293	102.747
3d0jFH_A.pdb	15	25	A	3.936	4.072	2.003	2	105.857	113.205
3gbsFH_A.pdb	37	115	A	5.611	3.694	2.029	2.03	102.761	102.909
3gbsFH_A.pdb	63	76	A	6.116	3.913	2.028	2.03	103.725	103.76
3gbsFH_A.pdb	177	184	A	6.291	3.766	2.031	2.03	102.483	102.958
3ggwFH_C.pdb	23	88	C	6.412	3.498	2.117	2.12	106.039	100.518
3ggwFH_C.pdb	134	194	C	6.597	3.644	2.027	2.02	104.918	103.293
2xu3FH_A.pdb	22	65	A	4.686	3.887	2.036	2.04	106.223	104.151
2xu3FH_A.pdb	56	98	A	4.894	3.921	2.028	2.03	102.773	104.691
2xu3FH_A.pdb	156	209	A	4.851	3.984	2.037	2.04	103.169	103.959
2qa9FH_E.pdb	42	58	E	6.662	3.882	2.115	2.12	103.136	103.812
2qa9FH_E.pdb	191	220	E	5.123	3.985	2.126	2.13	103.552	100.086
3h93FH_A.pdb	37	40	A	5.164	3.799	3.282	2.03	78.386	92.208
1ks8FH_A.pdb	365	372	A	5.48	3.696	2.027	2.03	103.086	104.935
2j5zFH_C.pdb	70	98	C	5.654	3.665	2.053	2.05	104.891	104.555
2j5zFH_C.pdb	222	235	C	5.573	3.745	2.028	2.03	101.401	103.581
2guyFH_A.pdb	30	38	A	5.436	3.783	2.129	2.13	104.332	104.436
2guyFH_A.pdb	150	164	A	5.27	4.412	2.49	2.49	119.418	100.697
2guyFH_A.pdb	240	283	A	5.041	3.627	2.041	2.04	106.303	106.451
2guyFH_A.pdb	440	475	A	5.303	3.86	3.118	2.05	79.806	102.906
1k7cFH_A.pdb	88	96	A	5.48	3.582	2.036	2.04	104.184	106.832
1k7cFH_A.pdb	214	232	A	5.417	3.56	2.027	2.03	101.949	104.53
1mexFH_H.pdb	22	92	H	6.471	3.658	2.072	2.07	105.843	101.27
1mexFH_H.pdb	142	208	H	6.556	3.705	2.016	2.02	104.847	108.946
1sh7FH_B.pdb	67	99	B	4.961	3.951	2.033	2.03	110.619	109.315
1sh7FH_B.pdb	163	194	B	5.315	4.124	2.003	2	106.691	105.259
1me8FH_A.pdb	26	459	A	5.404	3.841	2.04	2.04	106.482	102.665
3mbxFH_H.pdb	22	97	H	6.253	3.561	2.059	2.06	103.069	102.043
3mbxFH_H.pdb	148	204	H	6.614	3.858	2.027	2.03	103.919	103.443
3mhwFH_U.pdb	42	58	U	6.318	3.793	2.025	2.03	105.418	100.646
3mhwFH_U.pdb	50	111	U	4.931	4.002	2.044	2.04	105.958	104.672
3mhwFH_U.pdb	136	201	U	4.659	4.132	2.049	2.05	107.061	106.226
3mhwFH_U.pdb	168	182	U	6.561	3.821	2.041	2.04	106.179	104.387
3mhwFH_U.pdb	191	220	U	5.429	3.805	2.085	2.09	105.823	103.538
2wo1FH_A.pdb	73	191	A	4.043	4.053	2.075	2.07	106.144	102.818
2wo1FH_A.pdb	108	118	A	5.918	3.745	2.029	2.03	105.114	102.791
2iy9FH_A.pdb	288	331	A	5.309	3.832	2.038	2.04	106.016	103.655
3l91FH_B.pdb	433	453	B	5.584	3.855	2.103	2.1	104.625	106.532
3l91FH_B.pdb	555	568	B	5.783	3.571	2.046	2.05	100.507	104.419
3adrFH_A.pdb	3	26	A	5.671	3.794	2.035	2.04	105.752	104.167
1lwbFH_A.pdb	45	61	A	5.379	4.038	2.016	2.02	106.539	104.397
1lwbFH_A.pdb	96	107	A	5.428	3.609	2.02	2.02	104.611	103.256
3o1gFH_A.pdb	22	63	A	4.664	3.875	2.044	2.04	105.827	103.943
3o1gFH_A.pdb	56	96	A	4.904	3.922	2.031	2.03	104.575	105.067
3o1gFH_A.pdb	155	204	A	5.022	4.055	2.047	2.05	102.522	103.698
3nqxFH_A.pdb	237	263	A	5.32	4.257	2.06	2.06	106.858	105.62
1le6FH_A.pdb	11	69	A	5.989	3.765	2.038	2.04	102.669	103.517
1le6FH_A.pdb	25	115	A	5.9	3.839	2.032	2.03	101.81	103.756
1le6FH_A.pdb	27	43	A	5.095	3.932	2.032	2.03	104.391	105.468
1le6FH_A.pdb	42	97	A	5.818	3.796	2.036	2.04	104.647	104.098
1le6FH_A.pdb	48	122	A	5.604	3.647	2.028	2.03	102.199	102.497
1le6FH_A.pdb	49	90	A	5.732	3.772	2.025	2.03	104.691	104.162
1le6FH_A.pdb	58	83	A	5.492	3.769	2.032	2.03	104.019	102.97
1le6FH_A.pdb	76	88	A	6.039	3.847	2.024	2.02	102.915	104.469
1h80FH_B.pdb	269	298	B	6.5	4.165	2.04	2.04	109.28	101.512
1h80FH_B.pdb	269	298	B	6.5	4.165	2.04	2.04	109.28	101.512
1h80FH_B.pdb	336	360	B	5.535	3.729	2.029	2.03	103.463	103.203
1h80FH_B.pdb	408	476	B	5.322	3.901	2.028	2.03	106.426	102.796
1h80FH_B.pdb	408	476	B	5.322	3.901	2.028	2.03	106.426	102.796
1h80FH_B.pdb	412	484	B	4.786	3.801	3.472	2.02	118.228	63.429
1eltFH_A.pdb	42	58	A	6.331	3.76	2.019	2.02	101.862	103.599
1eltFH_A.pdb	136	201	A	4.041	4.041	2.027	2.03	105.279	104.074
1eltFH_A.pdb	168	182	A	6.497	3.666	2.025	2.03	104.476	102.368
1eltFH_A.pdb	191	220	A	5.26	3.714	2.036	2.04	106.126	104.126
2p45FH_B.pdb	22	96	B	6.39	3.495	2.173	2.08	101.264	100.6
1qupFH_B.pdb	17	20	B	4.949	4.055	2.035	2.04	106.058	105.087
1qupFH_B.pdb	27	64	B	6.227	3.849	2.043	2.04	102.31	103.614
3ejaFH_A.pdb	38	156	A	5.181	3.689	2.027	2.03	102.239	102.338
3ejaFH_A.pdb	126	208	A	5.866	3.694	2.035	2.04	102.999	103.218
3hhsFH_B.pdb	580	622	B	6.011	3.68	1.667	1.67	109.066	126.962
3hhsFH_B.pdb	582	629	B	6.176	3.837	2.072	2.07	107.847	102.87
1koeFH_A.pdb	164	304	A	5.829	3.744	2.044	2.04	103.556	103.579
1koeFH_A.pdb	266	296	A	5.822	3.892	2.032	2.03	101.051	103.223
1x91FH_A.pdb	8	17	A	5.505	3.656	2.064	2.06	106.292	103.257
1x91FH_A.pdb	71	111	A	4.76	4.009	2.127	2.13	104.695	107.406
2h62FH_A.pdb	14	79	A	5.295	3.588	2.036	2.04	100.829	105.181
2h62FH_A.pdb	43	111	A	5.859	3.758	2.042	2.04	101.557	104.698
2h62FH_A.pdb	47	113	A	5.993	3.786	2.015	2.02	100.567	102.133
1s5dFH_A.pdb	187	199	A	4.824	4.153	2.032	2.03	110.303	110.261
1hpgFH_A.pdb	42	58	A	6.486	3.831	2.032	2.03	105.697	106.692
1hpgFH_A.pdb	191	220	A	5.378	3.932	2.003	2.02	110.029	94.8
2hlcFH_A.pdb	42	58	A	6.38	3.778	2.032	2.03	102.69	103.459
2hlcFH_A.pdb	168	182	A	6.418	3.583	2.027	2.03	103.005	101.598
2hlcFH_A.pdb	191	220	A	5.381	3.663	2.024	2.02	104.357	103
1lrhFH_A.pdb	2	155	A	4.552	3.964	2.026	2.03	106.121	104.166
3hxsFH_B.pdb	63	66	B	5.476	3.789	4.795	2.06	85.636	22.249
1dokFH_A.pdb	11	36	A	5.47	3.554	2.029	2.03	102.246	104.322
1dokFH_A.pdb	12	52	A	5.877	3.685	2.036	2.04	103.471	103.608
1ms9FH_A.pdb	396	410	A	4.969	4.02	1.995	2	103.386	106.568
3o0dFH_C.pdb	30	299	C	4.849	4.068	2.09	2.09	102.88	107.966
3o0dFH_C.pdb	43	47	C	5.557	4.272	2.233	2.23	110.993	108.033
3o0dFH_C.pdb	120	123	C	5.201	4.442	2.104	2.1	114.038	110.764
3o0dFH_C.pdb	265	273	C	6.74	3.999	2.087	2.09	105.929	104.878
1hx0FH_A.pdb	28	86	A	5.315	3.897	2.164	2.16	103.719	101.484
1hx0FH_A.pdb	70	115	A	5.613	3.688	3.706	2.03	72.758	85.39
1hx0FH_A.pdb	141	160	A	5.071	4.302	3.195	2.11	80.852	103.884
1hx0FH_A.pdb	378	384	A	6.241	3.851	2.104	2.1	103.837	101.597
1hx0FH_A.pdb	450	462	A	5.283	3.871	4.59	2	33.491	78.493
3nyhFH_A.pdb	6	167	A	6.763	4.626	2.044	2.04	103.944	105.77
3nyhFH_A.pdb	15	28	A	5.603	3.643	2.045	2.05	96.889	104.364
3nyhFH_A.pdb	129	139	A	5.843	3.697	2.051	2.05	100.425	106.59
3nyhFH_A.pdb	133	157	A	5.918	3.665	2.068	2.07	100.991	101.348
3nyhFH_A.pdb	237	248	A	5.049	3.981	2.024	2.02	105.769	107.589
3nyhFH_A.pdb	456	513	A	6.257	3.744	2.07	2.07	107.71	89.408
3nyhFH_A.pdb	554	579	A	5.91	3.656	2.026	2.03	102.241	102.778
1kptFH_A.pdb	5	78	A	5.249	3.832	2.038	2.04	105.083	105.719
1kptFH_A.pdb	11	81	A	6.073	3.835	2.032	2.03	103.002	104.306
1kptFH_A.pdb	27	67	A	4.733	3.996	2.02	2.02	104.547	105.175
1kptFH_A.pdb	35	60	A	4.064	4.036	2.012	2.01	105.717	104.185
1kptFH_A.pdb	44	105	A	5.508	3.673	2.033	2.03	100.433	104.252
2g5rFH_A.pdb	46	106	A	4.829	3.828	2.005	2.01	104.899	109.712
1bgpFH_A.pdb	18	99	A	5.292	3.71	2.026	2.03	103.946	103.086
1bgpFH_A.pdb	51	56	A	3.865	4.212	2.031	2.03	102.647	104.797
1bgpFH_A.pdb	106	301	A	5.925	3.868	2.034	2.03	104.15	103.776
1bgpFH_A.pdb	186	213	A	6.002	3.823	2.029	2.03	103.679	105.098
2bpdFH_B.pdb	119	130	B	5.61	3.734	2.029	2.03	104.453	104.446
2bpdFH_B.pdb	147	240	B	5.405	3.828	2.111	2.11	106.723	103.866
2bpdFH_B.pdb	219	232	B	5.253	4.079	2.083	2.08	105.691	103.699
3dj9FH_A.pdb	261	321	A	6.527	3.791	2.038	2.04	102.627	103.961
3ggwFH_B.pdb	22	92	B	6.54	3.754	2.04	2.04	105.435	100.709
3ggwFH_B.pdb	142	197	B	6.727	4.057	2.045	2.01	105.328	106.345
1jd0FH_B.pdb	23	203	B	4.907	3.787	2.034	2.03	104.234	103.415
1fo9FH_A.pdb	115	145	A	5.297	4.077	2.034	2.03	108.915	103.533
1fo9FH_A.pdb	239	305	A	4.585	4.271	2.103	2.1	106.864	104.814
2hewFH_F.pdb	70	163	F	5.253	4.084	2.062	2.06	103.42	106.477
2hewFH_F.pdb	98	183	F	3.999	4.057	2.039	2.04	102.494	106.332
1klxFH_A.pdb	22	30	A	4.236	4.001	1.968	1.97	109.934	107.034
1klxFH_A.pdb	52	60	A	4.527	3.881	2.038	2.04	103.094	100.924
1klxFH_A.pdb	88	96	A	4.364	4.035	1.981	1.98	106.173	106.85
1klxFH_A.pdb	124	132	A	4.671	4.033	1.942	1.94	107.745	105.227
2ciwFH_A.pdb	79	87	A	6.464	4.063	2.103	2.1	104.065	108.002
2q9oFH_B.pdb	4	12	B	5.593	3.928	2.045	2.05	105.769	105.127
2q9oFH_B.pdb	114	540	B	5.079	4.005	2.043	2.04	107.142	103.117
2q9oFH_B.pdb	298	332	B	6	3.924	2.063	2.06	103.051	103.251
1tcaFH_A.pdb	22	64	A	3.922	4.043	2.032	2.03	104.713	105.335
1tcaFH_A.pdb	216	258	A	5.732	3.646	2.027	2.03	100.788	102.808
1tcaFH_A.pdb	293	311	A	5.066	3.975	2.038	2.04	104.448	104.441
1kngFH_A.pdb	92	95	A	5.208	3.646	2.042	2.04	102.555	105.573
3mu7FH_A.pdb	22	63	A	5.336	3.836	2.025	2.03	104.95	102.574
3mu7FH_A.pdb	158	187	A	5.757	3.642	2.033	2.03	104.323	105.614
1g1sFH_B.pdb	19	117	B	5.497	3.637	2.065	2.07	105.397	102.756
1g1sFH_B.pdb	90	109	B	5.321	4.064	2.051	2.05	105.229	106.779
1g1sFH_B.pdb	122	133	B	6.109	3.837	2.046	2.05	102.648	104.923
1g1sFH_B.pdb	127	142	B	5.492	3.78	2.047	2.05	106.266	100.371
1g1sFH_B.pdb	144	153	B	5.492	3.891	2.082	2.08	106.69	102.179
3n08FH_A.pdb	20	99	A	5.242	3.541	2.059	2.06	101.157	104.727
2vxtFH_H.pdb	22	92	H	6.412	3.579	2.05	2.05	101.88	104.465
2vxtFH_H.pdb	140	195	H	6.364	3.691	1.723	2.01	111.298	117.442
1gk8FH_G.pdb	449	459	G	6.512	3.895	2.015	2.01	110.505	106.675
1q8dFH_A.pdb	243	313	A	4.901	3.908	2.039	2.04	104.785	104.595
1q8dFH_A.pdb	250	256	A	5.171	3.948	2.034	2.03	103.53	104.622
1q8dFH_A.pdb	267	285	A	4.694	4.017	2.039	2.04	105.211	104.524
1q8dFH_A.pdb	277	337	A	5.057	3.665	2.031	2.03	102.541	102.963
1q8dFH_A.pdb	315	325	A	5.81	3.804	2.033	2.03	101.74	103.821
3eraFH_B.pdb	3	24	B	5.513	3.709	2.019	2.02	103.772	104.684
3eraFH_B.pdb	17	41	B	5.709	3.704	2.018	2.02	104.384	102.342
3eraFH_B.pdb	43	54	B	5.663	3.771	2.023	2.02	103.118	104.795
3eraFH_B.pdb	55	60	B	6.104	3.701	2.029	2.03	101.144	103.539
1yxjFH_B.pdb	144	155	B	5.715	3.769	2.027	2.03	103.481	103.525
1yxjFH_B.pdb	172	264	B	5.482	3.789	2.033	2.03	105.383	104.799
1yxjFH_B.pdb	243	256	B	5.035	3.985	2.034	2.03	105.858	104.892
1kntFH_A.pdb	5	55	A	5.656	3.621	2.023	2.02	103.029	102.281
1kntFH_A.pdb	14	38	A	5.531	3.769	2.026	2.03	103.001	103.296
1kntFH_A.pdb	30	51	A	6.372	3.802	2.03	2.03	103.84	103.558
3l4rFH_A.pdb	64	157	A	6.329	3.753	2.018	2.02	105.156	103.311
2hf9FH_A.pdb	95	127	A	5.873	3.849	2.032	2.03	104.323	102.053
1pzsFH_A.pdb	54	165	A	5.625	3.759	2.055	2.06	107.564	106.121
3c5jFH_B.pdb	15	79	B	5.432	3.752	2.666	2.67	96.317	98.083
3c5jFH_B.pdb	117	173	B	6.371	3.795	2.024	2.02	104.111	104.31
3a4uFH_A.pdb	190	230	A	5.423	4.031	2.042	2.04	104.96	104.461
1dl2FH_A.pdb	340	385	A	5.885	3.73	2.434	2.43	92.487	94.178
1dl2FH_A.pdb	468	471	A	5.29	4.067	2.468	2.47	104.226	93.102
1zr6FH_A.pdb	6	55	A	5.767	3.759	2.037	2.04	104.923	102.503
3erbFH_A.pdb	4	44	A	5.879	3.873	2.041	2.04	102.602	104.552
3erbFH_A.pdb	31	64	A	5.907	3.824	2.036	2.04	104.079	103.339
3erbFH_A.pdb	69	111	A	5.826	3.703	2.027	2.03	101.687	101.512
3erbFH_A.pdb	97	124	A	5.512	3.737	2.05	2.05	102.247	102.412
3erbFH_A.pdb	131	171	A	5.957	3.907	2.026	2.03	104.712	104.044
3erbFH_A.pdb	157	184	A	5.605	3.81	2.034	2.03	105.327	102.225
3c5jFH_A.pdb	107	163	A	6.387	3.847	2.033	2.03	104.233	104.895
2ex2FH_A.pdb	159	173	A	5.629	3.905	2.031	2.03	105.776	105.799
2ex2FH_A.pdb	217	234	A	5.873	3.773	2.054	2.05	105.043	105.675
3g89FH_B.pdb	164	249	B	5.336	4.084	2.029	2.03	102.173	107.987
3gh5FH_A.pdb	372	427	A	4.758	3.832	2.035	2.04	104.045	107.703
3boiFH_A.pdb	1	28	A	4.779	3.983	2.085	2.09	108.314	105.935
3boiFH_A.pdb	13	43	A	5.014	3.769	2.054	2.05	103.43	103.859
3lw6FH_A.pdb	255	310	A	5.836	3.844	2.081	2.08	109.655	105.643
3lw6FH_A.pdb	300	308	A	6.628	3.755	2.104	2.1	104.437	99.14
2otuFH_E.pdb	22	92	E	6.542	3.72	2.044	2.04	104.518	101.776
1km9FH_A.pdb	19	71	A	5.612	3.739	2.033	2.03	103.651	103.211
1km9FH_A.pdb	34	81	A	6.484	3.791	2.028	2.03	103.198	102.888
1km9FH_A.pdb	52	96	A	5.543	3.706	2.031	2.03	103.144	103.695
1km9FH_A.pdb	93	110	A	5.139	3.913	2.031	2.03	104.291	102.763
2hqyFH_A.pdb	92	294	A	4.108	4.274	2.156	2.16	105.099	108.325
2hqyFH_A.pdb	176	181	A	4.955	3.6	2.177	2.18	102.224	99.451
2f51FH_A.pdb	35	38	A	5.168	3.567	2.035	2.04	103.754	103.839
3fwaFH_A.pdb	30	89	A	5.719	3.648	2.036	2.04	105.583	102.851
1t61FH_E.pdb	20	111	E	5.996	3.809	2.028	2.03	103.497	103.017
1t61FH_E.pdb	53	108	E	5.827	3.887	2.033	2.03	102.185	105.649
1t61FH_E.pdb	65	71	E	3.878	3.983	2.045	2.05	103.769	106.32
1t61FH_E.pdb	130	225	E	5.972	3.797	2.034	2.03	103.469	103.898
1t61FH_E.pdb	164	222	E	5.903	3.936	2.04	2.04	102.429	106.222
1t61FH_E.pdb	176	182	E	3.888	4.059	2.048	2.05	104.393	107.503
1vjwFH_A.pdb	20	43	A	5.37	3.567	2.035	2.04	105.981	106.288
3h09FH_B.pdb	792	803	B	4.158	4.448	5.037	2.77	115.952	31.901
1oi0FH_C.pdb	77	98	C	5.176	4.016	2.044	2.04	106.267	104.455
3fw3FH_A.pdb	6	11G	A	5.922	3.81	2.088	2.09	104.55	110.625
3fw3FH_A.pdb	23	203	A	4.948	3.724	2.044	2.04	104.165	101.165
2nxfFH_A.pdb	234	272	A	5.942	3.816	5.071	2.01	22.548	87.095
1me4FH_A.pdb	22	63	A	4.667	3.928	2.057	2.06	105.184	103.321
1me4FH_A.pdb	56	95	A	4.911	3.961	2.062	2.06	102.552	105.638
1me4FH_A.pdb	153	200	A	5.366	4.165	2.056	2.06	100.552	103.962
1gpeFH_A.pdb	168	210	A	5.215	4.16	1.984	1.98	104.344	104.625
3qhzFH_M.pdb	23	88	M	6.457	3.61	2.058	2.06	103.438	101.878
3qhzFH_M.pdb	134	194	M	6.607	3.749	2.046	2.04	116.855	109.934
1vclFH_A.pdb	4	49	A	5.984	3.989	2.026	2.03	103.508	104.32
1vclFH_A.pdb	21	38	A	5.234	4.054	2.043	2.04	107.537	103.212
1vclFH_A.pdb	62	78	A	5.138	4.086	2.033	2.03	108.388	106.144
1vclFH_A.pdb	119	136	A	5.023	4.01	2.039	2.04	105.2	105.937
1vclFH_A.pdb	166	183	A	5.049	4.084	2.032	2.03	110.647	105.991
1vclFH_A.pdb	207	224	A	4.951	4.025	2.046	2.05	108.65	105.154
1vclFH_A.pdb	239	244	A	4.053	4.164	2.055	2.06	106.831	106.249
1vclFH_A.pdb	254	271	A	4.939	3.996	2.035	2.04	107.144	104.543
1vclFH_A.pdb	298	380	A	3.993	4.091	2.055	2.06	108.383	104.614
1vclFH_A.pdb	367	406	A	5.795	3.696	2.035	2.04	104.444	103.594
1vclFH_A.pdb	415	429	A	5.702	4.007	2.008	2.01	105.721	106.887
1vclFH_A.pdb	421	426	A	4.738	3.626	2.021	2.02	104.775	103.903
1h8pFH_B.pdb	24	48	B	5.627	3.679	2.027	2.03	102.821	102.672
1h8pFH_B.pdb	38	61	B	6.532	3.778	2.03	2.03	102.514	103.222
1h8pFH_B.pdb	69	94	B	5.627	3.682	2.033	2.03	102.859	102.504
1h8pFH_B.pdb	83	109	B	6.566	3.797	2.027	2.03	103.509	102.887
1qu1FH_D.pdb	144	148	D	5.232	3.946	2.029	2.03	105.165	103.363
1wd3FH_A.pdb	21	31	A	5.68	3.861	2.043	2.04	103.656	102.946
1wd3FH_A.pdb	81	86	A	5.884	3.884	2.024	2.02	103.276	103.105
1wd3FH_A.pdb	176	177	A	2.927	3.851	2.029	2.03	102.777	103.238
1wd3FH_A.pdb	401	439	A	4.531	3.896	2.042	2.04	106.209	104.249
2fa8FH_A.pdb	13	16	A	5.345	3.727	2.81	2.81	98.87	96.232
2bbaFH_A.pdb	61	184	A	3.961	3.938	2.068	2.07	104.061	104.614
2bbaFH_A.pdb	97	107	A	6.032	3.755	2.073	2.07	102.103	105.014
2gbtFH_A.pdb	57	146	A	5.894	3.928	2.067	2.07	104.781	100.843
1kb0FH_A.pdb	116	117	A	3.718	4.175	2.047	2.05	105.837	108.13
3a21FH_A.pdb	148	188	A	5.093	3.916	2.035	2.04	104.336	104.377
3a21FH_A.pdb	543	562	A	5.133	4.04	2.051	2.05	106.95	103.972
3a21FH_A.pdb	585	604	A	5.052	4.036	2.045	2.05	106.456	103.98
3a21FH_A.pdb	628	647	A	5.16	4.101	2.042	2.04	105.58	104.38
2wqrFH_A.pdb	254	312	A	6.39	3.703	2.022	2.02	100.112	105.349
2wqrFH_A.pdb	358	418	A	6.376	3.618	2.027	2.03	93.526	114.528
2wqrFH_A.pdb	464	524	A	6.506	3.69	2.047	2.05	101.217	100.45
3d43FH_B.pdb	51	65	B	5.188	4.142	4.739	2.11	99.077	23.753
1o7zFH_B.pdb	9	36	B	4.805	3.972	2.032	2.03	105.985	103.964
1o7zFH_B.pdb	11	53	B	6.044	3.691	2.056	2.06	104.124	99.503
2eiqFH_B.pdb	32	35	B	5.274	3.615	2.157	2.16	100.458	103.759
1itxFH_A.pdb	81	101	A	6.081	4.105	2.063	2.06	102.216	103.849
1itxFH_A.pdb	345	356	A	4.237	4.081	2.049	2.05	103.688	104.013
1w6sFH_C.pdb	2103	2104	C	3.768	4.099	2.121	2.12	104.259	104.901
1w6sFH_C.pdb	2386	2415	C	4.708	4.21	2.089	2.09	105.144	106.368
2giyFH_A.pdb	271	297	A	5.821	3.816	2.024	2.02	103.767	103.857
2giyFH_A.pdb	280	289	A	5.573	3.72	2.033	2.03	102.382	104.408
2giyFH_A.pdb	314	323	A	5.203	3.844	2.042	2.04	103.641	103.902
1zt5FH_A.pdb	176	206	A	5.46	3.698	2.047	2.05	103.718	102.746
1zt5FH_A.pdb	217	228	A	4.029	4.069	2.027	2.03	105.017	104.086
1zt5FH_A.pdb	230	251	A	5.441	3.602	2.019	2.02	104.486	104.244
1a7sFH_A.pdb	26	42	A	6.322	3.8	2.039	2.04	100.757	102.77
1a7sFH_A.pdb	123	181	A	4.319	3.968	1.982	1.98	107.883	106.538
1a7sFH_A.pdb	154	160	A	5.709	3.668	2.072	2.07	103.901	102.704
1a7sFH_A.pdb	171	196	A	5.392	3.61	2.056	2.06	103.17	101.551
2wfhFH_B.pdb	727	733	B	5.836	3.763	2.046	2.05	102.445	105.159
2wfhFH_B.pdb	731	740	B	4.355	4.017	2.05	2.05	103.951	107.148
2wfhFH_B.pdb	863	886	B	5.744	3.814	2.052	2.05	102.647	101.551
2wfhFH_B.pdb	865	907	B	5.048	3.789	2.03	2.03	106.515	103.412
1x38FH_A.pdb	151	159	A	5.503	4.175	2.164	2.16	102.475	105.912
1x38FH_A.pdb	513	518	A	5.171	3.953	2.029	2.03	103.66	107
2q0lFH_A.pdb	133	136	A	5.264	3.551	2.082	2.08	109.009	103.404
2o6xFH_A.pdb	120	163	A	4.633	3.905	2.072	2.07	107.004	101.986
2o6xFH_A.pdb	154	195	A	4.863	3.996	2.129	2.13	101.465	106.02
2o6xFH_A.pdb	253	302	A	5.259	4.251	2.827	2.83	96.523	105.423
1qg8FH_A.pdb	155	243	A	6.023	3.701	2.04	2.04	101.712	104.4
3gmiFH_A.pdb	161	177	A	6.199	4.104	2.581	2.58	108.396	95.621
2os9FH_B.pdb	261	353	B	5.41	3.835	2.048	2.05	106.648	106.747
2os9FH_B.pdb	331	345	B	5.067	3.994	2.059	2.06	107.178	104.355
3fwzFH_B.pdb	417	481	B	5.222	3.765	2.054	2.05	104.929	103.874
1jltFH_A.pdb	27	126	A	5.683	3.884	2.155	2.16	102.672	101.806
1jltFH_A.pdb	29	45	A	4.978	3.874	2.154	2.15	103.018	102.298
1jltFH_A.pdb	44	105	A	5.73	3.642	2.14	2.14	103.471	102.371
1jltFH_A.pdb	50	133	A	5.635	3.784	2.126	2.13	100.577	104.567
1jltFH_A.pdb	51	98	A	5.733	3.824	2.134	2.13	104.537	104.709
1jltFH_A.pdb	59	91	A	6.176	3.908	2.163	2.16	105.985	101.541
1jltFH_A.pdb	84	96	A	5.848	3.73	2.205	2.21	99.082	102.611
1p28FH_B.pdb	16	47	B	6.007	3.733	2.088	2.09	101.501	106.219
1p28FH_B.pdb	43	104	B	4.627	4.149	2.034	2.03	105.372	102.801
1p28FH_B.pdb	92	113	B	5.776	3.617	2.061	2.06	102.575	103.877
1aunFH_A.pdb	10	205	A	4.892	3.779	2.028	2.03	103.774	102.974
1aunFH_A.pdb	52	62	A	3.886	4.043	2.03	2.03	105.503	104.207
1aunFH_A.pdb	67	73	A	5.717	3.727	2.023	2.02	104.313	101.979
1aunFH_A.pdb	121	193	A	4.813	3.919	2.034	2.03	104.861	105.848
1aunFH_A.pdb	126	176	A	5.039	3.795	2.028	2.03	104.093	103.972
1aunFH_A.pdb	134	144	A	5.941	3.685	2.035	2.04	102.57	102.834
1aunFH_A.pdb	148	157	A	4.969	4.14	2.036	2.04	104.423	104.37
1aunFH_A.pdb	158	163	A	5.575	3.762	2.032	2.03	102.085	103.862
2y7bFH_A.pdb	1076	1081	A	4.166	4.314	2.072	2.07	103.627	110.723
2zibFH_A.pdb	10	21	A	5.742	3.782	2.028	2.03	102.113	103.315
2zibFH_A.pdb	38	128	A	5.479	3.727	2.049	2.05	105.183	104.395
2zibFH_A.pdb	72	103	A	5.239	4.042	2.034	2.03	104.506	107.034
2zibFH_A.pdb	92	114	A	4.804	3.926	2.069	2.07	104.782	103.886
2zibFH_A.pdb	104	120	A	5.064	3.938	2.029	2.03	106.823	103.731
3ci7FH_A.pdb	5	55	A	5.723	3.632	2.066	2.07	104.211	101.092
1jndFH_A.pdb	6	33	A	5.897	3.783	2.05	2.05	101.653	103.6
1jndFH_A.pdb	322	405	A	5.771	3.575	2.028	2.03	99.344	103.026
1ijbFH_A.pdb	509	695	A	6.011	3.832	2.035	2.04	103.356	103.856
1f0lFH_B.pdb	186	201	B	5.551	3.599	2.025	2.03	106.782	105.67
1f0lFH_B.pdb	461	471	B	3.964	4.003	2.053	2.05	102.429	102.889
1c7kFH_A.pdb	99	112	A	5.698	3.818	2.041	2.04	103.488	104.189
2pspFH_B.pdb	6	104	B	4.886	4.048	2.01	2.01	105.561	104.231
2pspFH_B.pdb	8	35	B	5.662	3.647	2.04	2.04	103.768	103.267
2pspFH_B.pdb	19	34	B	6.542	3.623	2.045	2.05	102.827	104.318
2pspFH_B.pdb	29	46	B	5.955	3.999	2.05	2.05	103.655	106.181
2pspFH_B.pdb	58	84	B	5.748	3.634	2.008	2.01	104.122	100.115
2pspFH_B.pdb	68	83	B	6.522	3.687	2.019	2.02	100.437	102.588
2pspFH_B.pdb	78	95	B	5.87	3.871	2.019	2.02	104.788	103.549
1tgxFH_B.pdb	3	21	B	5.628	3.76	2.036	2.04	103.307	105.49
1tgxFH_B.pdb	14	38	B	5.858	3.711	2.044	2.04	106.245	102.596
1tgxFH_B.pdb	42	53	B	6.133	3.768	2.039	2.04	102.182	103.15
1tgxFH_B.pdb	54	59	B	6.286	3.859	2.032	2.03	103.478	102.628
2ehgFH_A.pdb	58	145	A	5.68	3.818	2.034	2.03	104.287	104.417
2engFH_A.pdb	11	135	A	5.099	3.956	2.042	2.04	105.441	103.181
2engFH_A.pdb	12	47	A	5.447	3.913	2.025	2.03	105.104	106.881
2engFH_A.pdb	16	86	A	5.574	3.664	2.058	2.06	104.778	102.643
2engFH_A.pdb	31	56	A	5.116	4.01	2.035	2.04	104.459	102.354
2engFH_A.pdb	87	199	A	5.97	3.931	2.042	2.04	104.97	105.191
2engFH_A.pdb	89	189	A	5.117	3.978	2.043	2.04	105.091	101.99
2engFH_A.pdb	156	167	A	5.788	3.769	2.051	2.05	103.141	106.82
1i8kFH_B.pdb	322	396	B	6.139	3.544	2.294	2.29	99.093	92.854
3fy3FH_A.pdb	144	147	A	5.673	4.392	3.675	2.07	67.857	119.222
2cg7FH_A.pdb	66	94	A	5.716	3.708	2.04	2.04	103.634	105.321
2cg7FH_A.pdb	92	104	A	3.946	4.086	2.022	2.02	104.879	105.42
2cg7FH_A.pdb	110	138	A	5.792	3.742	2.032	2.03	103.162	103.079
2cg7FH_A.pdb	136	148	A	3.923	4.007	2.053	2.05	104.99	105.65
1to4FH_A.pdb	56	145	A	5.999	3.944	2.071	2.07	104.015	104.157
2sn3FH_A.pdb	12	65	A	4.692	3.958	2.043	2.12	75.22	133.507
2sn3FH_A.pdb	16	41	A	6.071	3.802	2.064	2.06	104.753	101.297
2sn3FH_A.pdb	25	46	A	5.095	3.563	2.026	2.03	105.609	103.427
2sn3FH_A.pdb	29	48	A	5.4	3.68	3.008	2.03	73.277	64.803
1t6gFH_D.pdb	92	111	D	5.661	3.962	2.102	2.1	113.384	103.722
1eajFH_B.pdb	41	120	B	6.525	3.69	2.109	2.11	102.021	104.057
3me7FH_B.pdb	40	44	B	6.045	4.009	2.036	2.04	104.062	102.99
1ucaFH_A.pdb	15	23	A	5.848	3.688	2.029	2.03	102.459	103.525
1ucaFH_A.pdb	48	91	A	5.03	3.93	2.029	2.03	103.906	104.356
1ucaFH_A.pdb	151	184	A	4.836	3.889	2.031	2.03	104.826	104.115
1ucaFH_A.pdb	168	179	A	5.357	4.123	2.032	2.03	104.098	105.697
2qrlFH_A.pdb	205	249	A	5.713	3.489	2.06	2.06	102.884	103.149
2d7tFH_L.pdb	23	88	L	6.631	3.765	2.034	2.03	106.159	104.164
3dk9FH_A.pdb	58	63	A	4.697	4.305	3.224	2.22	75.19	97.562
1qgiFH_A.pdb	50	124	A	5.18	3.442	2.047	2.05	104	104.021
1w3iFH_A.pdb	120	150	A	6.378	3.643	2.039	2.04	95.782	110.224
1j05FH_B.pdb	22	92	B	6.426	3.532	2.052	2.05	101.421	104.121
1bu8FH_A.pdb	4	10	A	3.83	3.995	2.031	2.03	104.403	104.58
1bu8FH_A.pdb	90	101	A	5.876	3.695	2.021	2.02	106.304	103.889
1bu8FH_A.pdb	237	261	A	5.378	3.498	2.03	2.03	103.453	103.216
1bu8FH_A.pdb	285	296	A	5.571	3.484	2.031	2.03	102.195	103.662
1bu8FH_A.pdb	299	304	A	5.062	3.879	2.037	2.04	102.21	101.075
1bu8FH_A.pdb	433	449	A	5.801	3.561	2.032	2.03	104.78	103.899
2z66FH_B.pdb	24	30	B	5.93	3.8	2.039	2.04	104.167	104.025
2z66FH_B.pdb	28	37	B	4.257	3.973	2.033	2.03	104.374	104.263
2z66FH_B.pdb	583	609	B	5.707	3.8	2.03	2.03	104.423	103.039
2z66FH_B.pdb	585	627	B	5.044	4.014	2.034	2.03	105.784	102.376
1bueFH_A.pdb	69	238	A	4.965	4.068	2.033	2.03	104.859	105.379
1oaqFH_L.pdb	22	90	L	6.418	3.71	2.063	2.06	104.737	107.26
1zxtFH_B.pdb	12	36	B	5.498	3.699	2.055	2.06	104.503	100.571
1zxtFH_B.pdb	13	52	B	5.814	3.666	2.041	2.04	101.83	100.606
3gxbFH_A.pdb	1669	1670	A	3.74	4.17	2.049	2.05	106.132	105.451
3d22FH_A.pdb	4	58	A	5.979	3.849	2.087	2.09	102.531	101.886
3i1uFH_A.pdb	138	161	A	5.188	3.857	2.025	2.03	103.183	104.281
2d81FH_A.pdb	70	79	A	6.374	3.982	2.042	2.04	104.755	104.246
2d81FH_A.pdb	169	180	A	5.197	3.892	2.034	2.03	105.054	102.914
2d81FH_A.pdb	234	241	A	6.014	3.979	2.036	2.04	102.52	105.94
2d81FH_A.pdb	250	304	A	4.153	4.087	2.031	2.03	105.022	103.44
1lo6FH_A.pdb	22	157	A	5.044	3.948	2.03	2.03	102.776	105.194
1lo6FH_A.pdb	42	58	A	6.296	3.837	2.033	2.03	102.345	103.536
1lo6FH_A.pdb	128	232	A	5.312	4.009	2.038	2.04	105.429	103.648
1lo6FH_A.pdb	136	201	A	4.419	3.943	2.026	2.03	102.74	105.912
1lo6FH_A.pdb	168	182	A	5.763	3.614	2.018	2.02	104.116	103.415
1lo6FH_A.pdb	191	220	A	5.648	3.741	2.04	2.04	104.008	103.408
1hm6FH_B.pdb	324	343	B	5.644	3.874	1.955	1.96	108.907	100.596
1rhfFH_B.pdb	24	77	B	6.354	3.735	2.05	2.05	104.37	104.976
1rhfFH_B.pdb	120	163	B	6.919	4.044	2.076	2.08	106.763	106.943
1fuxFH_A.pdb	25	108	A	6.067	3.913	2.064	2.06	103.898	105.533
2x02FH_B.pdb	44	51	B	3.923	4.086	2.029	2.03	105.819	105.267
3djoFH_A.pdb	26	84	A	5.488	3.536	2.026	2.03	102.817	102.23
3djoFH_A.pdb	40	95	A	5.634	3.708	2.028	2.03	102.954	103.158
3djoFH_A.pdb	58	110	A	5.804	3.688	2.03	2.03	104.106	104.691
3djoFH_A.pdb	65	72	A	5.259	4.024	2.022	2.02	104.022	103.026
1g12FH_A.pdb	5	75	A	4.956	3.852	2.036	2.04	104.733	103.871
1g12FH_A.pdb	77	97	A	4.579	3.97	2.032	2.03	103.343	104.25
3hjrFH_A.pdb	4	24	A	5.805	3.632	2.018	2.02	101.777	103.687
3hjrFH_A.pdb	301	326	A	4.904	3.906	2.013	2.01	105.939	109.191
1b3aFH_B.pdb	10	34	B	5.596	3.658	2.031	2.03	103.451	105.655
1b3aFH_B.pdb	11	50	B	5.98	3.589	2.052	2.05	100.149	101.269
3dlqFH_R.pdb	71	79	R	6.193	3.911	2.074	2.07	103.251	103.172
3dlqFH_R.pdb	128	217	R	6.758	3.825	2.036	2.04	102.723	103.98
2c42FH_B.pdb	1195	1212	B	5.108	3.941	2.03	2.03	104.49	103.642
1m0zFH_A.pdb	4	17	A	4.584	3.957	2.042	2.04	103.119	105.189
1m0zFH_A.pdb	209	248	A	5.54	3.802	2.027	2.03	105.97	102.934
1m0zFH_A.pdb	211	264	A	5.505	3.744	2.031	2.03	104.636	103.157
3cu9FH_A.pdb	221	222	A	3.721	3.94	2.109	2.11	104.534	106.879
3oqyFH_B.pdb	26	84	B	5.594	3.584	2.04	2.04	101.72	101.697
3oqyFH_B.pdb	40	95	B	5.682	3.877	2.029	2.03	108.736	102.694
3oqyFH_B.pdb	58	110	B	5.979	3.818	2.039	2.04	107.45	104.896
3oqyFH_B.pdb	65	72	B	5.216	4.051	2.051	2.05	104.032	102.592
1l1dFH_B.pdb	440	495	B	7.329	4.825	2.909	2.91	100.323	104.192
2dgeFH_B.pdb	137	143	B	5.938	3.735	2.026	2.03	102.606	105.852
1gqvFH_A.pdb	23	83	A	5.666	3.622	2.073	2.07	102.17	102.844
1gqvFH_A.pdb	37	96	A	6.83	3.997	2.287	2.29	101.056	92.636
1gqvFH_A.pdb	55	111	A	5.885	3.645	2.069	2.07	103.503	102.868
1gqvFH_A.pdb	62	71	A	5.218	3.969	2.07	2.07	101.776	105.072
2xy2FH_A.pdb	42	93	A	6.46	3.648	2.02	2.02	97.26	105.845
2xy2FH_A.pdb	136	186	A	6.64	3.754	2.033	2.03	105.969	102
2zk9FH_X.pdb	23	32	X	4.806	3.946	2.646	2.1	97.64	89.468
2zk9FH_X.pdb	76	172	X	6.008	3.631	2.068	2.07	101.858	101.97
2zk9FH_X.pdb	77	126	X	5.71	3.703	2.629	1.98	95.701	88.344
2zk9FH_X.pdb	161	183	X	5.706	3.444	2.693	2	92.112	88.553
1oc7FH_A.pdb	181	240	A	4.955	3.91	2.128	2.13	101.99	102.448
1oc7FH_A.pdb	372	419	A	5.044	3.96	2.047	2.05	105.714	103.063
3gaxFH_B.pdb	47	69	B	6.071	4.256	3.564	2.1	101.331	99.984
3gaxFH_B.pdb	73	83	B	5.554	3.455	2.286	2.29	105.721	70.745
3gaxFH_B.pdb	97	117	B	4.025	4.203	2.115	2.12	105.81	104.638
3iflFH_H.pdb	22	97	H	6.443	3.681	2.066	2.07	107.32	104.834
3iflFH_H.pdb	147	202	H	6.49	3.569	2.041	2.02	104.483	106.97
3gmxFH_B.pdb	31	40	B	4.049	4.154	2.109	2.11	104.776	107.639
3gmxFH_B.pdb	103	125	B	4.076	4.123	2.087	2.09	105.312	107.874
3k6yFH_A.pdb	214	395	A	5.573	3.751	2.047	2.05	105.39	101.904
3kcgFH_H.pdb	42	58	H	6.339	3.773	2.038	2.04	104.397	102.902
3kcgFH_H.pdb	168	182	H	6.356	3.573	2.037	2.02	102.119	103.41
3kcgFH_H.pdb	191	220	H	5.523	3.836	2.043	2.04	105.936	101.064
2wtaFH_A.pdb	45	214	A	5.832	3.777	2.031	2.03	101.246	102.909
3cx5FH_E.pdb	164	180	E	6.506	3.797	2.03	2.03	102.397	105.622
1uozFH_A.pdb	169	213	A	6.399	3.703	2.004	2	105.745	101.682
1uozFH_A.pdb	320	356	A	5.687	3.771	2.007	2.01	106.308	106.226
1goiFH_B.pdb	328	331	B	5.255	3.623	2.099	2.1	105.152	102.605
2xtsFH_B.pdb	188	192	B	5.99	3.946	2.097	2.1	101.773	100.793
1d5lFH_B.pdb	1	14	B	5.631	3.844	2.009	2.01	104.091	102.562
1l1lFH_B.pdb	119	419	B	5.263	3.876	2.039	2.04	103.776	105.417
3mbgFH_B.pdb	142	145	B	5.138	3.436	2.037	2.04	104.19	104.92
3mbgFH_B.pdb	171	188	B	5.85	3.78	2.048	2.05	103.916	101.954
3bp5FH_A.pdb	21	90	A	6.427	3.783	2.047	2.05	104.456	104.322
1jfxFH_A.pdb	108	147	A	5.342	3.777	2.033	2.03	104.542	105.271
1o4wFH_A.pdb	13	100	A	4.815	4.171	2.113	2.11	107.606	107.014
1xu1FH_T.pdb	71	86	T	6.241	4.429	2.045	2.05	101.233	109.59
1xu1FH_T.pdb	89	100	T	5.616	3.93	2.096	2.1	110.702	103.836
1xu1FH_T.pdb	93	104	T	5.578	3.867	2.049	2.05	107.994	106.249
3c9zFH_A.pdb	14	33	A	5.052	3.994	2.029	2.03	108.331	103.243
3c9zFH_A.pdb	55	72	A	5.145	4.155	2.059	2.06	105.431	105.115
3c9zFH_A.pdb	143	158	A	5.043	4.099	2.127	2.13	108.012	103.572
3c9zFH_A.pdb	184	201	A	5.047	3.987	2.079	2.08	111.684	103.351
2fm6FH_A.pdb	256	296	A	6.313	3.779	2.076	2.08	102.486	105.102
2ejnFH_B.pdb	3	143	B	5.408	3.76	2.044	2.04	103.88	104.566
2ejnFH_B.pdb	44	118	B	5.718	3.647	2.058	2.06	104.6	101.681
2ejnFH_B.pdb	70	77	B	3.897	4.114	2.051	2.05	102.91	102.808
1g1tFH_A.pdb	19	117	A	5.401	3.674	2.03	2.03	104.204	103.252
1g1tFH_A.pdb	90	109	A	5.286	3.943	2.031	2.03	105.008	103.937
1g1tFH_A.pdb	122	133	A	5.838	3.708	2.032	2.03	103.077	103.906
1g1tFH_A.pdb	127	142	A	5.788	3.818	2.031	2.03	104.193	103.189
1g1tFH_A.pdb	144	153	A	5.369	3.834	2.034	2.03	103.368	103.311
1jfuFH_A.pdb	10	155	A	5.337	3.453	2.022	2.02	102.578	102.924
1jfuFH_A.pdb	72	75	A	5.199	3.549	2.028	2.03	101.011	105.323
1b80FH_A.pdb	3	15	A	5.482	3.751	1.994	1.99	107.614	105.586
1b80FH_A.pdb	14	285	A	5.443	3.762	2.022	2.02	108.685	104.671
1b80FH_A.pdb	34	120	A	4.97	3.786	2.04	2.04	104.701	102.399
1b80FH_A.pdb	249	317	A	4.658	4.033	2.018	2.02	105.953	106.45
1wb0FH_A.pdb	26	51	A	6.224	3.829	2.028	2.03	103.068	105.077
1wb0FH_A.pdb	307	372	A	5.494	3.802	2.035	2.03	102.517	104.41
3bqpFH_B.pdb	5	78	B	4.544	3.973	2.111	2.11	104.322	103.102
3bqpFH_B.pdb	8	72	B	5.995	3.926	2.043	2.04	106.429	104.356
3bqpFH_B.pdb	36	47	B	5.55	3.607	2.076	2.08	105.534	101.614
2dqaFH_A.pdb	10	87	A	5.516	3.59	2.017	2.02	103.594	103.385
2dqaFH_A.pdb	13	119	A	6.041	3.876	2.031	2.03	103.706	103.23
2dqaFH_A.pdb	15	22	A	4.636	3.682	2.035	2.04	103.707	104.53
2dqaFH_A.pdb	27	36	A	3.94	4.028	2.037	2.04	104.557	104.457
2dqaFH_A.pdb	49	69	A	5.156	4.021	2.028	2.03	104.747	104.444
2dqaFH_A.pdb	59	65	A	5.121	3.967	2.053	2.05	102.299	105.312
2dqaFH_A.pdb	83	101	A	5.824	3.69	2.034	2.03	104.023	105.813
2qwcFH_A.pdb	92	417	A	4.97	3.959	2.041	2.04	104.077	104.543
2qwcFH_A.pdb	124	129	A	3.98	4.111	2.058	2.06	104.789	108.214
2qwcFH_A.pdb	175	193	A	5.919	3.682	2.033	2.03	104.575	102.789
2qwcFH_A.pdb	183	230	A	5.15	3.92	2.035	2.04	103.714	103.898
2qwcFH_A.pdb	232	237	A	4.017	4.021	2.034	2.03	102.47	105.042
2qwcFH_A.pdb	278	291	A	3.952	4.004	2.062	2.06	104.689	103.795
2qwcFH_A.pdb	280	289	A	4.057	4.116	2.06	2.06	103.94	105.597
2qwcFH_A.pdb	318	337	A	4.076	4.219	2.038	2.04	105.264	102.764
2qwcFH_A.pdb	421	447	A	3.897	4.061	2.059	2.06	106.399	105.72
1cxyFH_A.pdb	24	53	A	4.766	3.804	2.038	2.04	103.122	105.752
2qmjFH_A.pdb	15	31	A	6.63	3.61	2.063	2.06	102.603	106.481
2qmjFH_A.pdb	26	44	A	5.919	4.011	2.916	2.92	84.56	102.648
2qmjFH_A.pdb	573	584	A	4.689	4.078	2.086	2.09	105.713	109.247
2vecFH_A.pdb	10	204	A	5.901	3.712	2.046	2.05	105.396	104.764
1gxyFH_A.pdb	21	223	A	6.173	3.802	2.029	2.03	103.434	101.357
1gxyFH_A.pdb	121	173	A	3.938	4.049	2.039	2.04	104.781	106.53
2ds2FH_D.pdb	11	59	D	5.281	3.723	2.033	2.03	104.381	104.039
2ds2FH_D.pdb	23	67	D	5.426	3.729	2.036	2.04	103.172	103.699
1jcvFH_A.pdb	57	146	A	5.832	3.876	2.035	2.04	103.225	103.493
1tzpFH_A.pdb	44	265	A	6.037	3.978	2.102	2.1	103.405	103.581
1tzpFH_A.pdb	187	235	A	6	3.658	2.043	2.04	102.345	103.67
1tzpFH_A.pdb	216	223	A	5.769	3.588	2.076	2.08	100.98	104.029
2gkrFH_I.pdb	8	38	I	5.409	3.621	2.064	2.06	105.606	102.75
2gkrFH_I.pdb	16	35	I	5.614	3.614	2.044	2.04	103.64	102.823
2gkrFH_I.pdb	24	56	I	4.855	3.946	2.041	2.04	101.55	101.759
1rdoFH_2.pdb	133	222	2	5.371	3.738	2.03	2.03	104.686	104.07
1rdoFH_2.pdb	200	214	2	4.948	3.952	2.036	2.04	105.651	101.158
1uoyFH_A.pdb	3	30	A	5.754	3.795	2.04	2.04	102.379	103.639
1uoyFH_A.pdb	18	38	A	5.909	3.786	2.045	2.04	104.439	101.511
1uoyFH_A.pdb	28	54	A	5.724	3.77	2.041	2.04	103.122	105.273
1uoyFH_A.pdb	49	64	A	5.32	3.773	2.007	2.01	104.727	105.944
3fgrFH_A.pdb	147	157	A	5.577	3.818	2.112	2.11	101.689	105.988
1fd3FH_A.pdb	8	37	A	5.935	3.89	2.061	2.06	103.369	101.698
1fd3FH_A.pdb	15	30	A	6.111	3.775	2.068	2.07	100.677	103.995
1fd3FH_A.pdb	20	38	A	5.616	3.714	2.073	2.07	103.848	103.403
3hc4FH_L.pdb	23	88	L	6.59	3.703	2.419	2.42	101.976	96.542
3hc4FH_L.pdb	134	194	L	6.464	3.593	2.088	2.09	105.473	106.138
3ognFH_B.pdb	26	57	B	5.719	3.746	2.157	2.16	98.873	106.671
3ognFH_B.pdb	53	104	B	4.788	4.532	2.31	2.31	111.554	102.784
3ognFH_B.pdb	95	113	B	5.982	3.728	2.058	2.06	103.243	104.102
1nq6FH_A.pdb	168	200	A	4.441	4.176	2.039	2.03	109.984	111.122
1nq6FH_A.pdb	256	262	A	5.341	4.057	2.018	2.02	107.323	107.688
1nxcFH_A.pdb	478	510	A	6.256	3.95	2.063	2.06	101.64	106.148
3bwuFH_D.pdb	63	90	D	4.664	3.932	2.046	2.05	104.341	108.015
2xfdFH_A.pdb	90	101	A	6.001	3.661	2.077	2.08	104.548	101.169
3npdFH_A.pdb	92	130	A	5.217	3.553	2.025	2.03	103.154	104.397
3f75FH_A.pdb	18	45	A	5.363	3.696	2.96	2.96	95.548	91.23
3f75FH_A.pdb	28	71	A	4.62	3.9	2.046	2.05	104.943	105.583
3f75FH_A.pdb	62	104	A	4.931	3.967	2.074	2.07	105.568	103.594
3f75FH_A.pdb	90	109	A	6.159	3.896	2.047	2.05	101.74	105.174
3f75FH_A.pdb	161	213	A	4.893	3.951	2.043	2.04	107.086	101.926
2sgaFH_A.pdb	42	58	A	6.455	3.744	2.031	2.03	100.058	104.13
2sgaFH_A.pdb	191	220	A	5.045	4.026	2.047	2.05	104.532	104.586
1yphFH_D.pdb	42	58	D	6.376	3.851	2.043	2.04	102.247	102.438
1fobFH_A.pdb	253	311	A	4.308	3.714	2.038	2.04	104.675	105.381
3l0vFH_A.pdb	225	333	A	5.35	3.958	2.056	2.06	104.782	102.368
3l0vFH_A.pdb	365	469	A	5.511	3.658	2.017	2.02	104.332	105.219
3l0vFH_A.pdb	423	453	A	5.984	3.792	2.022	2.02	105.718	105.476
2vk2FH_A.pdb	129	193	A	5.051	3.827	2.143	2.14	103.179	102.991
1vhuFH_A.pdb	111	154	A	4.87	3.782	2.032	2.03	103.238	103.42
3hogFH_A.pdb	57	146	A	5.655	3.636	2.06	2.06	98.139	101.202
2eh6FH_A.pdb	329	345	A	5.577	3.815	2.03	2.03	106.493	104.304
1puoFH_B.pdb	7	162	B	3.818	4.19	2.035	2.04	105.633	104.652
1puoFH_B.pdb	48	136	B	5.855	3.83	2.093	2.09	104.447	103.821
1puoFH_B.pdb	73	95	B	5.379	3.815	2.024	2.02	109.035	103.145
2vi1FH_A.pdb	9	204	A	4.92	3.846	2.073	2.07	102.302	103.253
2vi1FH_A.pdb	56	66	A	3.938	4.325	3.134	2.1	110.242	80.258
2vi1FH_A.pdb	71	77	A	5.626	3.682	2.034	2.03	103.867	101.478
2vi1FH_A.pdb	121	193	A	5.223	3.898	2.104	2.1	103.869	99.973
2vi1FH_A.pdb	126	177	A	5.281	3.687	2.067	2.07	105.034	100.727
2vi1FH_A.pdb	134	145	A	5.795	3.693	2.068	2.07	104.589	102.076
2vi1FH_A.pdb	149	158	A	4.673	3.903	2.997	2.07	94.897	74.384
2vi1FH_A.pdb	159	164	A	5.199	3.806	2.085	2.01	101.321	106.784
3ab6FH_A.pdb	10	86	A	5.448	3.648	2.028	2.03	102.982	101.637
3ab6FH_A.pdb	13	118	A	5.907	3.868	2.029	2.03	102.781	103.14
3ab6FH_A.pdb	15	21	A	4.592	3.75	2.029	2.03	103.956	103.102
3ab6FH_A.pdb	26	35	A	3.957	3.959	2.033	2.03	105.015	103.097
3ab6FH_A.pdb	48	68	A	5.149	3.953	2.034	2.03	105.195	105.042
3ab6FH_A.pdb	58	64	A	5.045	3.922	2.034	2.03	102.515	105.101
3ab6FH_A.pdb	82	100	A	5.833	3.719	2.029	2.03	102.757	103.322
1svbFH_A.pdb	3	30	A	5.402	3.809	2.034	2.03	105.345	104.016
1svbFH_A.pdb	60	121	A	5.911	3.908	2.025	2.03	103.342	104.08
1svbFH_A.pdb	74	105	A	5.412	3.631	2.024	2.02	101.918	104.906
1svbFH_A.pdb	92	116	A	4.051	4.083	2.027	2.03	105.038	104.943
1svbFH_A.pdb	186	290	A	3.993	4.067	2.027	2.03	103.814	104.074
1svbFH_A.pdb	307	338	A	4.874	3.86	2.034	2.03	103.579	101.102
2c0gFH_B.pdb	1024	1027	B	4.952	3.853	2.044	2.04	107.953	100.137
3cp7FH_B.pdb	23	42	B	6.207	3.707	2.077	2.08	102.378	105.728
3cp7FH_B.pdb	144	162	B	5.099	3.457	2.056	2.06	102.78	102.766
3cz1FH_B.pdb	20	51	B	5.728	3.689	2.164	2.16	100.636	104.518
3cz1FH_B.pdb	47	98	B	4.551	4.056	2.041	2.04	104.937	104.055
3cz1FH_B.pdb	89	107	B	5.828	3.741	2.057	2.06	103.545	103.561
3l9yFH_B.pdb	56	146	B	5.956	3.875	2.07	2.07	106.055	102.274
3cj1FH_A.pdb	75	99	A	5.768	3.845	2.066	2.07	103.8	111.749
3cj1FH_A.pdb	242	284	A	5.435	3.677	2.092	2.09	102.574	105.369
3cj1FH_A.pdb	265	310	A	4.767	4.042	2.124	2.12	108.211	103.107
3cj1FH_A.pdb	323	328	A	5.92	3.76	2.029	2.03	105.582	101.82
3cj1FH_A.pdb	377	399	A	4.823	3.965	2.036	2.04	100.054	103.573
2wwxFH_A.pdb	23	123	A	6.004	3.948	2.054	2.05	105.83	105.791
2wnvFH_E.pdb	154	171	E	4.05	4.133	2.046	2.05	104.583	105.387
3bovFH_A.pdb	42	102	A	6.578	3.754	2.023	2.02	103.409	102.13
3bovFH_A.pdb	49	106	A	5.206	3.734	2.019	2.02	103.741	104.161
3manFH_A.pdb	74	81	A	5.772	3.548	2.023	2.02	104.479	103.517
2jigFH_B.pdb	195	230	B	5.794	3.573	2.043	2.04	103.67	102.299
3o26FH_A.pdb	263	305	A	5.217	4.165	2.038	2.04	116.436	107.215
1deuFH_A.pdb	10P	31	A	5.708	4.03	2.531	2.53	96.231	96.929
1deuFH_A.pdb	28	71	A	4.515	3.86	2.037	2.04	105.755	104.027
1deuFH_A.pdb	65	103	A	5.091	3.884	2.028	2.03	101.894	103.752
1deuFH_A.pdb	93	109	A	4.237	3.65	2.033	2.03	103.212	103.625
1deuFH_A.pdb	112	118	A	3.917	3.918	2.032	2.03	104.02	103.701
1deuFH_A.pdb	153	235	A	3.93	3.973	2.033	2.03	104.327	104.774
1j34FH_A.pdb	2	13	A	5.728	3.821	2.033	2.03	103.657	103.339
1j34FH_A.pdb	30	127	A	5.383	3.784	2.034	2.03	104.823	104.888
1j34FH_A.pdb	102	119	A	5.133	3.938	2.03	2.03	103.781	103.603
2oqeFH_B.pdb	338	364	B	7.134	4.162	2.623	2.62	110.888	100.013
1pkoFH_A.pdb	24	98	A	6.667	3.744	2.027	2.03	102.998	104.167
2w50FH_B.pdb	11	98	B	3.77	3.847	2.038	2.04	104.745	102.434
2w50FH_B.pdb	14	87	B	6.1	3.754	2.028	2.03	103.094	101.782
2w50FH_B.pdb	45	56	B	5.8	3.566	2.025	2.03	100.024	101.921
3mmhFH_B.pdb	75	109	B	5.607	4.179	2.134	2.19	109.444	138.215
1czfFH_A.pdb	30	45	A	5.813	3.852	2.032	2.03	102	104.293
1czfFH_A.pdb	203	219	A	5.78	3.578	2.032	2.03	101.91	104.54
1czfFH_A.pdb	329	334	A	6.112	3.726	2.028	2.03	102.204	102.923
1czfFH_A.pdb	353	362	A	6.799	4.069	2.02	2.02	102.173	105.594
2nukFH_A.pdb	134	151	A	6.535	3.842	2.03	2.03	101.731	104.596
1y4jFH_B.pdb	156	290	B	5.713	3.962	2.093	2.09	106.197	105.134
1k6aFH_A.pdb	255	261	A	5.293	3.94	2.029	2.03	103.623	105.072
1sfsFH_A.pdb	21	200	A	6.155	4.119	2.104	2.1	107.425	106.75
1sfsFH_A.pdb	144	184	A	5.822	3.939	2.206	2.21	102.111	101.987
2pc8FH_A.pdb	275	397	A	5.259	3.63	2.008	2.01	105.768	104.011
2pc8FH_A.pdb	300	326	A	5.351	3.51	2.02	2.02	102.64	104.156
1z40FH_E.pdb	149	302	E	5.77	3.609	2.099	2.1	103.098	101.447
1z40FH_E.pdb	217	247	E	5.581	3.805	2.073	2.07	106.736	106.253
1z40FH_E.pdb	320	418	E	5.818	3.791	2.02	2.02	102.621	105.479
1z40FH_E.pdb	337	409	E	5.347	3.623	2.063	2.06	105.584	107.813
2f91FH_A.pdb	42	58	A	6.442	3.899	2.065	2.07	105.239	106.26
2f91FH_A.pdb	168	182	A	6.511	3.665	2.115	2.12	99.091	103.302
2f91FH_A.pdb	191	219	A	5.414	3.668	2.103	2.1	103.396	99.322
1qsaFH_A.pdb	106	139	A	4.794	3.855	2.039	2.04	103.139	103.75
3op8FH_A.pdb	245	296	A	6.111	4.102	2.016	2.02	109.429	107.419
3op8FH_A.pdb	281	306	A	5.86	3.728	2.064	2.06	100.006	110.378
3op8FH_A.pdb	288	326	A	4.774	3.961	2.062	2.06	104.901	106.691
2z4uFH_A.pdb	34	258	A	5.775	3.874	2.058	2.06	104.27	103.654
2z4uFH_A.pdb	84	105	A	5.849	3.729	2.064	2.06	106.582	103.643
1wmzFH_D.pdb	3	14	D	5.89	3.873	2.053	2.05	104.309	103.215
1wmzFH_D.pdb	31	135	D	5.272	3.669	2.045	2.05	102.191	106.181
3q3uFH_A.pdb	3	15	A	5.31	3.669	2.058	2.06	104.723	105.575
3q3uFH_A.pdb	14	283	A	5.314	3.713	2.034	2.03	104.419	104.554
3q3uFH_A.pdb	34	120	A	4.859	3.724	2.043	2.04	102.913	103.175
3q3uFH_A.pdb	247	314	A	4.581	3.908	2.033	2.03	105.458	104.33
2yquFH_B.pdb	40	45	B	4.698	4.368	2.045	2.05	109.8	103.17
2oizFH_B.pdb	225	242	B	3.926	4.063	2.031	2.03	109.386	109.032
1qozFH_B.pdb	2	79	B	5.821	3.662	2.031	2.03	103.394	102.418
1qozFH_B.pdb	46	52	B	5.561	3.56	2.027	2.03	103.348	103.733
1qozFH_B.pdb	101	161	B	4.893	3.745	2.032	2.03	104.103	104.733
1qozFH_B.pdb	147	179	B	5.966	3.825	2.028	2.03	103.142	103.232
1qozFH_B.pdb	171	178	B	6.159	3.917	2.031	2.03	104.539	104.249
3ha9FH_A.pdb	74	77	A	5.357	3.755	2.1	2.1	100.837	102.328
1pylFH_A.pdb	9	97	A	4.942	3.883	2.027	2.03	104.932	105.696
1m2tFH_B.pdb	311	328	B	5.194	4.253	2.075	2.08	110.668	100.959
1m2tFH_B.pdb	399	412	B	5.139	3.978	2.083	2.08	107.874	101.163
1m2tFH_B.pdb	438	455	B	5.289	4.197	2.041	2.04	110.128	104.778
1t61FH_C.pdb	19	108	C	5.864	3.778	2.031	2.03	102.774	103.328
1t61FH_C.pdb	52	105	C	5.829	3.905	2.038	2.04	102.688	105.252
1t61FH_C.pdb	64	70	C	3.916	3.973	2.033	2.03	103.886	105.994
1t61FH_C.pdb	127	223	C	5.896	3.691	2.032	2.03	102.812	102.133
1t61FH_C.pdb	161	220	C	5.946	3.907	2.037	2.04	102.899	105.158
1t61FH_C.pdb	173	180	C	3.854	4.06	2.039	2.04	105.389	107.927
2b6nFH_A.pdb	66	98	A	5.008	4.057	2.042	2.04	108.095	108.481
2b6nFH_A.pdb	167	198	A	5.341	4.074	2.036	2.04	105.061	102.841
2pfeFH_B.pdb	42	58	B	6.481	3.923	2.061	2.06	103.562	105.878
2pfeFH_B.pdb	137	159	B	3.984	4.046	2.042	2.07	105.225	105.158
2pfeFH_B.pdb	189	219A	B	5.1	3.998	2.039	2.06	104.184	103.857
1vyoFH_A.pdb	4	83	A	5.532	3.626	2.019	2.02	103.614	104.09
1iqqFH_A.pdb	15	22	A	5.468	3.715	2.029	2.03	103.047	101.512
1iqqFH_A.pdb	48	91	A	5.056	3.974	2.083	2.08	103.957	100.376
1iqqFH_A.pdb	155	193	A	4.995	3.998	2.054	2.05	105.37	103.538
1iqqFH_A.pdb	170	181	A	5.23	4.04	2.087	2.09	104.233	103.026
2w15FH_A.pdb	117	197	A	5.793	3.861	2.01	2.01	105.133	105.667
2w15FH_A.pdb	157	181	A	5.563	3.777	2.091	2.09	102.873	102.006
2w15FH_A.pdb	159	164	A	5.863	4.015	2.094	2.09	103.329	107.323
1a2yFH_B.pdb	22	95	B	6.501	3.685	2.056	2.06	104.766	104.578
3l9uFH_A.pdb	32	35	A	5.241	3.777	3.2	2.03	81.61	92.487
3fmuFH_A.pdb	3	15	A	5.536	3.654	2.06	2.06	103.868	102.774
3fmuFH_A.pdb	14	278	A	5.53	3.722	2.042	2.04	105.097	103.971
3fmuFH_A.pdb	34	114	A	4.962	3.779	2.046	2.05	104.824	104.556
3fmuFH_A.pdb	242	307	A	4.893	4.168	2.125	2.13	110.131	104.05
1l9lFH_A.pdb	7	70	A	5.934	3.734	2.065	2.07	103.254	100.987
1l9lFH_A.pdb	34	45	A	5.294	3.568	2.061	2.06	105.128	102.947
3pimFH_A.pdb	68	176	A	4.516	3.774	2.109	2.11	106.067	105.379
3d4uFH_B.pdb	3	31	B	5.701	3.692	2.04	2.04	101.753	102.654
3d4uFH_B.pdb	10	27	B	5.526	3.664	2.048	2.05	104.111	103.685
3d4uFH_B.pdb	16	32	B	6.145	3.793	2.049	2.05	101.692	101.244
3d4uFH_B.pdb	40	70	B	5.708	3.719	2.056	2.06	103.44	102.397
3d4uFH_B.pdb	47	64	B	5.46	3.61	2.091	2.09	102.822	102.035
3d4uFH_B.pdb	54	71	B	5.736	3.54	2.091	2.09	101.913	102.017
1x9dFH_A.pdb	527	556	A	5.951	3.92	2.075	2.08	101.652	103.147
1z6oFH_D.pdb	4	24	D	4.608	3.963	2.021	2.02	106.065	104.469
2w59FH_A.pdb	372	431	A	6.48	3.74	3.051	2.04	91.86	87.297
2w59FH_A.pdb	477	546	A	6.666	3.706	2.032	2.05	107.193	100.72
3f5vFH_B.pdb	4	117	B	4.929	3.957	2.067	2.07	107.327	104.559
3f5vFH_B.pdb	31	71	B	4.653	3.968	2.061	2.06	113.749	102.466
3f5vFH_B.pdb	65	103	B	4.712	4.135	2.109	2.11	102.236	109.45
3hdfFH_B.pdb	52	71	B	5.051	3.511	2.022	2.02	101.919	104.884
3hdfFH_B.pdb	132	160	B	4.845	3.986	2.019	2.02	105.14	102.433
1dxjFH_A.pdb	24	86	A	4.709	3.964	2.027	2.03	103.676	103.378
1dxjFH_A.pdb	98	104	A	5.882	3.615	2.303	2.3	102.393	97.32
1dxjFH_A.pdb	203	235	A	5.062	3.706	2.229	2.23	101.908	100.508
1nepFH_A.pdb	8	121	A	5.019	4.072	2.052	2.05	106.411	107.156
1nepFH_A.pdb	23	28	A	4.903	3.829	2.042	2.04	103.671	104.766
1nepFH_A.pdb	74	80	A	5.581	3.798	2.032	2.03	103.537	104.23
3ebvFH_A.pdb	189	207	A	5.708	3.707	2.105	2.11	100.446	102.708
3ebvFH_A.pdb	246	253	A	4.723	3.942	2.09	2.09	103.261	101.892
3b8fFH_C.pdb	52	92	C	6.41	4.145	2.06	2.06	103.386	108.351
3q0hFH_A.pdb	45	108	A	6.676	3.819	2.053	2.05	101.373	102.892
1xu1FH_D.pdb	187	202	D	5.946	4.082	2.035	2.04	105.023	106.982
2e27FH_L.pdb	23	88	L	6.547	3.631	2.043	2.04	104.998	102.521
3c05FH_A.pdb	7	30	A	5.177	3.671	2.007	2.01	102.812	106.927
3c05FH_A.pdb	21	27	A	6.137	3.982	2.097	2.1	104.419	102.461
3c05FH_A.pdb	26	51	A	5.683	3.752	2.081	2.08	103.689	102.191
3c05FH_A.pdb	39	58	A	5.996	3.69	2.04	2.04	102.863	102.671
1dypFH_A.pdb	98	268	A	5.224	3.972	2.03	2.03	104.576	104.051
1lr7FH_A.pdb	66	77	A	5.697	3.697	2.093	2.09	104.001	104.33
1lr7FH_A.pdb	71	87	A	5.505	3.674	2.041	2.04	103.645	103.926
1lr7FH_A.pdb	89	121	A	5.856	3.719	2.028	2.03	106.425	104.183
1lr7FH_A.pdb	93	114	A	5.312	3.736	2.091	2.09	106.549	103.413
1lr7FH_A.pdb	103	135	A	4.75	3.998	2.04	2.04	103.671	104.123
3kffFH_A.pdb	64	157	A	5.886	3.846	2.148	2.15	102.797	99.195
2uvoFH_B.pdb	3	18	B	5.965	3.904	2.077	2.08	104.551	101.265
2uvoFH_B.pdb	12	24	B	5.813	3.792	2.057	2.06	103.203	103.476
2uvoFH_B.pdb	17	31	B	5.094	3.883	2.062	2.06	102.932	104.049
2uvoFH_B.pdb	35	40	B	5.697	3.651	2.056	2.06	103.38	107.365
2uvoFH_B.pdb	46	61	B	5.948	3.89	2.058	2.06	103.897	101.946
2uvoFH_B.pdb	55	67	B	5.838	3.848	2.05	2.05	104.372	103.235
2uvoFH_B.pdb	60	74	B	5.222	3.953	2.088	2.09	103.164	104.676
2uvoFH_B.pdb	78	83	B	5.808	3.62	2.039	2.04	104.529	106.689
2uvoFH_B.pdb	89	104	B	5.948	3.899	2.075	2.07	104.157	101.988
2uvoFH_B.pdb	98	110	B	5.84	3.832	2.046	2.05	104.423	102.356
2uvoFH_B.pdb	103	117	B	5.156	3.93	2.041	2.04	103.128	104.947
2uvoFH_B.pdb	121	126	B	5.701	3.597	2.033	2.03	103.373	106.336
2uvoFH_B.pdb	132	147	B	6.013	3.95	2.076	2.08	103.19	103.181
2uvoFH_B.pdb	141	153	B	5.871	3.719	2.048	2.05	103.397	100.757
2uvoFH_B.pdb	146	160	B	5.241	3.988	2.115	2.11	103.301	105.427
2uvoFH_B.pdb	164	169	B	5.818	3.621	2.015	2.01	103.552	105.878
2q86FH_B.pdb	23	91	B	6.391	3.617	2.629	2.63	91.428	102.505
2q86FH_B.pdb	141	202	B	6.181	3.455	2.004	2	98.555	102.947
3bd2FH_A.pdb	26	29	A	5.194	3.725	2.009	2.01	102.778	102.46
2eu7FH_X.pdb	2	121	X	6.272	4.141	2.02	2.04	81.158	120.756
2eu7FH_X.pdb	39	170	X	6.174	3.459	1.951	2.05	106.682	97.448
3d3zFH_A.pdb	5	22	A	5.849	3.791	2.007	2.01	105.555	106.025
3d3zFH_A.pdb	13	58	A	5.581	3.86	1.982	1.98	106.907	105.168
3d3zFH_A.pdb	21	126	A	5.483	3.699	2.07	2.07	105.987	105.545
3d3zFH_A.pdb	66	118	A	5.058	3.952	2.067	2.07	102.112	103.426
3d3zFH_A.pdb	191	225	A	5.233	3.93	2.006	2.01	102.853	107.269
3be6FH_C.pdb	268	274	C	5.283	4.014	2.036	2.04	103.917	103.408
3ozhFH_A.pdb	240	252	A	5.762	3.729	2.088	2.09	109.648	102.118
1xphFH_A.pdb	265	395	A	3.889	4.119	2.05	2.05	100.52	106.47
1xphFH_A.pdb	268	279	A	5.634	3.729	2.051	2.05	103.803	103.679
1xphFH_A.pdb	296	389	A	5.46	3.821	2.104	2.1	103.587	105.266
1xphFH_A.pdb	368	381	A	5.336	4.045	2.037	2.04	107.449	103.616
3psmFH_A.pdb	3	47	A	5.763	3.532	2.035	2.04	104.907	94.197
3psmFH_A.pdb	14	35	A	5.501	3.737	2.032	2.03	107.359	105.338
3psmFH_A.pdb	20	41	A	5.383	3.738	2.04	2.04	104.734	104.113
3psmFH_A.pdb	24	43	A	5.471	3.696	2.035	2.04	104.032	104.738
3ejuFH_A.pdb	31	1032	A	5.538	3.614	2.06	2.06	103.982	103.149
3ejuFH_A.pdb	275	282	A	5.518	3.717	2.034	2.03	104.757	103.193
3ejuFH_A.pdb	283	297	A	6.079	4.003	2.066	2.07	104.179	102.213
3ejuFH_A.pdb	902	987	A	4	4.112	2.057	2.06	105.897	106.241
3ejuFH_A.pdb	1000	1009	A	6.011	3.626	2.017	2.02	103.891	102.249
2x46FH_A.pdb	19	134	A	5.235	3.612	2.023	2.02	106.192	102.937
2x46FH_A.pdb	50	155	A	5.479	3.754	2.074	2.07	101.238	103.438
2x46FH_A.pdb	109	135	A	6.448	3.859	2.043	2.04	103.337	106.059
2petFH_A.pdb	22	94	A	6.431	3.707	2.029	2.03	104.626	104.731
2petFH_A.pdb	141	206	A	6.409	3.652	2.082	2.08	100.476	103.131
2ejuFH_A.pdb	171	192	A	4.685	3.722	2.041	2.04	104.626	103.109
2ht9FH_B.pdb	28	113	B	5.814	3.885	2.046	2.05	102.248	106.364
3g63FH_A.pdb	1114	1159	A	5.485	3.644	2.059	2.06	101.381	103.331
3g63FH_A.pdb	1300	1363	A	5.488	3.679	2.072	2.07	104.636	103.487
3fevFH_A.pdb	3	24	A	5.469	3.813	2.057	2.06	103.289	105.056
3fevFH_A.pdb	17	42	A	5.692	3.662	2.065	2.07	104.915	101.035
3fevFH_A.pdb	46	57	A	6.054	3.671	2.056	2.06	102.946	103.078
3fevFH_A.pdb	58	63	A	6.189	3.776	2.026	2.03	102.431	101.261
1wqjFH_B.pdb	6	32	B	5.465	3.706	2.072	2.07	107.375	102.003
1wqjFH_B.pdb	9	34	B	5.936	3.702	2.032	2.03	103.669	100.613
1wqjFH_B.pdb	17	35	B	5.498	3.688	2.054	2.05	103.481	105.452
1wqjFH_B.pdb	23	38	B	4.736	3.631	2.018	2.02	107.617	105.15
1wqjFH_B.pdb	46	59	B	5.923	3.851	2.062	2.06	104.83	99.336
1wqjFH_B.pdb	53	79	B	5.71	3.898	2.059	2.06	107.307	106.08
1qnxFH_A.pdb	4	17	A	4.846	3.939	2.038	2.04	104.652	104.423
1qnxFH_A.pdb	8	101	A	5.648	3.772	2.022	2.02	103.874	103.76
1qnxFH_A.pdb	26	94	A	5.609	3.717	2.024	2.02	105.364	102.448
1qnxFH_A.pdb	170	187	A	3.959	3.973	2.05	2.05	104.573	105.659
3enuFH_A.pdb	49	139	A	5.386	3.858	2.031	2.03	104.867	104.565
3p5hFH_A.pdb	223	319	A	5.501	3.88	2.056	2.06	107.25	109.896
3p5hFH_A.pdb	295	311	A	5.152	3.992	2.051	2.05	105.167	103.345
3l4aFH_A.pdb	32	65	A	5.753	3.657	2.036	2.04	100.741	103.571
3l4aFH_A.pdb	61	118	A	4.515	3.89	2.032	2.03	105.862	101.861
3l4aFH_A.pdb	105	127	A	5.974	3.818	2.052	2.05	105.253	102.354
1kvdFH_C.pdb	37	53	C	5.933	3.856	2.021	2.02	104.585	105.274
2rikFH_A.pdb	210	272	A	6.562	3.771	2.085	2.09	102.9	103.063
1v0zFH_B.pdb	98	425	B	4.956	3.943	2.055	2.05	103.488	105.179
1v0zFH_B.pdb	130	135	B	3.9	4.015	2.027	2.03	105.181	105.357
1v0zFH_B.pdb	182	200	B	5.768	3.561	2.048	2.05	103.019	105.9
1v0zFH_B.pdb	190	237	B	5.048	3.893	2.036	2.04	105.065	104.02
1v0zFH_B.pdb	239	244	B	4.06	4.076	2.039	2.04	104.181	105.65
1v0zFH_B.pdb	285	298	B	4.073	4.135	2.081	2.08	105.095	106.67
1v0zFH_B.pdb	287	296	B	4.079	4.145	2.047	2.05	104.028	105.463
1v0zFH_B.pdb	325	343	B	4.041	4.221	2.039	2.04	103.474	104.575
1v0zFH_B.pdb	429	455	B	3.951	4.043	2.049	2.05	104.603	105.176
2anyFH_A.pdb	42	58	A	6.361	3.881	2.037	2.04	102.482	103.02
2anyFH_A.pdb	136	201	A	4.414	4.042	2.034	2.03	105.752	105.369
2anyFH_A.pdb	168	182	A	6.254	3.514	2.062	2.06	99.39	101.275
2anyFH_A.pdb	191	220	A	5.374	3.76	2.081	2.08	105.794	101.665
2im9FH_A.pdb	140	349	A	5.212	3.932	2.693	2.03	78.335	140.227
1thgFH_A.pdb	61	105	A	5.009	3.803	2.034	2.03	102.53	103.209
1thgFH_A.pdb	276	288	A	6.055	3.876	2.03	2.03	104.09	105.28
2covFH_I.pdb	382	468	I	4.83	3.489	2.069	2.07	106.317	101.701
2covFH_I.pdb	413	418	I	4.069	4.013	2.149	2.15	104.396	101.779
1f94FH_A.pdb	3	24	A	5.545	3.711	2.021	2.02	103.649	102.301
1f94FH_A.pdb	6	11	A	3.922	4.099	2.057	2.06	106.272	105.362
1f94FH_A.pdb	17	39	A	5.489	3.683	2.059	2.06	105.158	105.007
1f94FH_A.pdb	43	55	A	6.012	3.795	2.027	2.03	103.03	102.437
1f94FH_A.pdb	56	61	A	6.195	3.794	2.039	2.04	102.544	101.73
2ouaFH_A.pdb	42	58	A	6.275	3.782	2.036	2.04	103.067	102.614
2ouaFH_A.pdb	137	159	A	3.906	3.986	2.036	2.04	105.438	105.176
2ouaFH_A.pdb	189	219A	A	5.003	3.928	2.039	2.04	104.686	103.133
1rh9FH_A.pdb	347	354	A	5.82	3.636	2.821	2.82	84.06	93.304
3nokFH_A.pdb	130	176	A	5.651	3.811	2.096	2.1	100.369	119.859
2qpnFH_B.pdb	63	233	B	5.956	3.474	3.754	2.32	82.359	73.857
2osvFH_B.pdb	270	324	B	6.398	4.187	2.075	2.08	104.268	104.735
1q35FH_A.pdb	134	190	A	6.013	3.792	3.257	2.03	73.651	75.791
2wb6FH_A.pdb	56	62	A	3.898	4.065	2.047	2.05	105.364	105.405
1m48FH_A.pdb	58	105	A	5.544	3.962	2.066	2.07	102.04	103.814
3dgtFH_A.pdb	161	169	A	5.575	4.084	2.037	2.04	103.303	104.027
3dgtFH_A.pdb	181	186	A	5.331	4.082	2.047	2.05	104.453	104.783
3hr6FH_A.pdb	383	443	A	6.054	3.959	2.092	2.09	109.455	103.727
1usgFH_A.pdb	53	78	A	5.723	3.869	2.061	2.06	101.621	112.801
3hdlFH_A.pdb	11	91	A	5.821	3.617	2.041	2.03	101.333	107.943
3hdlFH_A.pdb	44	49	A	3.974	4.262	2.049	2.05	98.586	113.195
3hdlFH_A.pdb	97	299	A	5.78	3.922	2.04	2.04	99.846	109.045
3hdlFH_A.pdb	176	208	A	5.412	3.407	2.037	2.04	103.785	97.449
2xw9FH_A.pdb	26	42	A	6.592	4.183	2.159	2.08	94.343	98.077
2xw9FH_A.pdb	123	189	A	4.449	4.154	2.04	2.04	107.728	107.863
2xw9FH_A.pdb	154	170	A	6.619	3.768	2.05	2.05	105.558	103.686
2xw9FH_A.pdb	179	204	A	5.409	3.659	2.021	2.05	107.088	100.266
3gylFH_B.pdb	42	58	B	6.562	3.901	2.051	2.1	97.377	114.643
3gylFH_B.pdb	136	201	B	4.291	4.061	2.033	2.03	104.193	103.306
3gylFH_B.pdb	168	182	B	6.196	3.553	2.056	2.06	98.715	101.678
3gylFH_B.pdb	191	219	B	4.747	3.653	2.057	2.06	104.945	104.725
2z72FH_A.pdb	27	47	A	4.769	3.917	1.96	1.94	108.208	111.808
3gkjFH_A.pdb	25	74	A	5.484	3.736	2.046	2.05	104.221	103.44
3gkjFH_A.pdb	31	42	A	5.046	4.14	2.052	2.05	107.911	103.03
3gkjFH_A.pdb	63	109	A	5.854	3.806	2.053	2.05	104.72	102.952
3gkjFH_A.pdb	75	113	A	4.619	3.912	2.056	2.06	104.195	104.598
3gkjFH_A.pdb	97	238	A	4.767	3.823	2.037	2.04	106.176	104.49
3gkjFH_A.pdb	100	160	A	4.76	3.956	2.034	2.03	104.623	102.174
3gkjFH_A.pdb	177	184	A	6.14	3.734	2.081	2.08	101.588	102.909
3gkjFH_A.pdb	227	243	A	5.938	3.647	2.048	2.05	104.011	102.941
3gkjFH_A.pdb	240	247	A	4.686	3.915	2.026	2.03	104.639	104.684
2jh1FH_A.pdb	29	69	A	5.194	3.5	2.114	2.11	103.531	100.88
2jh1FH_A.pdb	37	45	A	4.777	3.885	2.044	2.04	103.815	101.913
2jh1FH_A.pdb	87	97	A	5.78	3.956	2.126	2.13	109.189	104.662
2jh1FH_A.pdb	91	127	A	4.511	3.931	2.07	2.07	103.862	105.283
2jh1FH_A.pdb	138	163	A	5.261	3.632	2.11	2.11	102.22	106.01
2jh1FH_A.pdb	177	187	A	5.927	3.767	2.071	2.07	102.426	105.249
2jh1FH_A.pdb	181	226	A	5.737	3.677	2.055	2.05	102.772	104.855
[truncated: 875 more rows]

## Sheet: CA-CB distance
PDB	CYS residue	CA-CB distance
3obuFH_A.pdb	73 A	1.53
3obuFH_A.pdb	87 A	1.529
1yc5FH_A.pdb	124 A	1.52
1yc5FH_A.pdb	127 A	1.531
1yc5FH_A.pdb	148 A	1.524
1yc5FH_A.pdb	151 A	1.534
1gteFH_D.pdb	49 D	1.53
1gteFH_D.pdb	52 D	1.529
1gteFH_D.pdb	79 D	1.531
1gteFH_D.pdb	82 D	1.529
1gteFH_D.pdb	87 D	1.533
1gteFH_D.pdb	91 D	1.527
1gteFH_D.pdb	126 D	1.531
1gteFH_D.pdb	130 D	1.532
1gteFH_D.pdb	136 D	1.534
1gteFH_D.pdb	140 D	1.533
1gteFH_D.pdb	175 D	1.529
1gteFH_D.pdb	202 D	1.528
1gteFH_D.pdb	257 D	1.534
1gteFH_D.pdb	322 D	1.533
1gteFH_D.pdb	324 D	1.53
1gteFH_D.pdb	347 D	1.536
1gteFH_D.pdb	354 D	1.528
1gteFH_D.pdb	385 D	1.529
1gteFH_D.pdb	622 D	1.53
1gteFH_D.pdb	643 D	1.528
1gteFH_D.pdb	671 D	1.53
1gteFH_D.pdb	684 D	1.532
1gteFH_D.pdb	695 D	1.529
1gteFH_D.pdb	816 D	1.533
1gteFH_D.pdb	831 D	1.53
1gteFH_D.pdb	953 D	1.533
1gteFH_D.pdb	956 D	1.533
1gteFH_D.pdb	959 D	1.533
1gteFH_D.pdb	963 D	1.528
1gteFH_D.pdb	986 D	1.535
1gteFH_D.pdb	989 D	1.54
1gteFH_D.pdb	992 D	1.537
1gteFH_D.pdb	996 D	1.529
1gteFH_D.pdb	1001 D	1.528
1nq7FH_A.pdb	227 A	1.527
1nq7FH_A.pdb	262 A	1.53
1nq7FH_A.pdb	287 A	1.539
1nq7FH_A.pdb	299 A	1.533
1nq7FH_A.pdb	308 A	1.53
1nq7FH_A.pdb	350 A	1.533
1nq7FH_A.pdb	420 A	1.529
2eiyFH_B.pdb	94 B	1.538
1kewFH_A.pdb	60 A	1.53
1kewFH_A.pdb	194 A	1.522
1kewFH_A.pdb	274 A	1.531
2wfjFH_A.pdb	10 A	1.533
2wfjFH_A.pdb	33 A	1.544
2wfjFH_A.pdb	37 A	1.521
2wfjFH_A.pdb	42 A	1.532
2wfjFH_A.pdb	44 A	1.531
2wfjFH_A.pdb	63 A	1.515
2wfjFH_A.pdb	174 A	1.53
3i36FH_A.pdb	918 A	1.523
3i36FH_A.pdb	1020 A	1.52
3i36FH_A.pdb	1028 A	1.536
3i36FH_A.pdb	1118 A	1.532
3i36FH_A.pdb	1173 A	1.529
1m2xFH_D.pdb	85 D	1.532
1m2xFH_D.pdb	221 D	1.522
2fe3FH_A.pdb	96 A	1.544
2fe3FH_A.pdb	99 A	1.543
2fe3FH_A.pdb	136 A	1.536
2fe3FH_A.pdb	139 A	1.531
1ub3FH_A.pdb	37 A	1.529
1ub3FH_A.pdb	81 A	1.529
1z8gFH_A.pdb	77 A	1.53
1z8gFH_A.pdb	90 A	1.531
1z8gFH_A.pdb	119 A	1.532
1z8gFH_A.pdb	138 A	1.526
1z8gFH_A.pdb	140 A	1.534
1z8gFH_A.pdb	150 A	1.532
1z8gFH_A.pdb	153 A	1.529
1z8gFH_A.pdb	188 A	1.524
1z8gFH_A.pdb	204 A	1.524
1z8gFH_A.pdb	277 A	1.529
1z8gFH_A.pdb	291 A	1.526
1z8gFH_A.pdb	322 A	1.526
1z8gFH_A.pdb	338 A	1.519
1z8gFH_A.pdb	349 A	1.532
1z8gFH_A.pdb	359 A	1.528
1z8gFH_A.pdb	372 A	1.53
1z8gFH_A.pdb	381 A	1.532
3qn1FH_A.pdb	30 A	1.546
3qn1FH_A.pdb	65 A	1.531
3qn1FH_A.pdb	77 A	1.507
3edvFH_A.pdb	1900 A	1.531
3edvFH_A.pdb	1970 A	1.53
2p7iFH_B.pdb	68 B	1.529
2p7iFH_B.pdb	140 B	1.526
2p7iFH_B.pdb	174 B	1.51
2p7iFH_B.pdb	225 B	1.52
2p7iFH_B.pdb	236 B	1.55
2p7iFH_B.pdb	243 B	1.524
2ex4FH_A.pdb	65 A	1.529
2ex4FH_A.pdb	69 A	1.523
2ex4FH_A.pdb	117 A	1.528
2ex4FH_A.pdb	118 A	1.547
2ex4FH_A.pdb	154 A	1.524
2ex4FH_A.pdb	185 A	1.526
2ex4FH_A.pdb	196 A	1.544
3bx4FH_A.pdb	5 A	1.549
3bx4FH_A.pdb	16 A	1.504
3bx4FH_A.pdb	33 A	1.507
3bx4FH_A.pdb	83 A	1.526
3bx4FH_A.pdb	106 A	1.557
3bx4FH_A.pdb	123 A	1.55
3bx4FH_A.pdb	131 A	1.531
2fc3FH_A.pdb	70 A	1.532
2pb2FH_B.pdb	59 B	1.533
2pb2FH_B.pdb	124 B	1.534
2pb2FH_B.pdb	188 B	1.538
2pb2FH_B.pdb	216 B	1.53
2pb2FH_B.pdb	230 B	1.534
2pb2FH_B.pdb	292 B	1.529
2aaxFH_A.pdb	849 A	1.513
2aaxFH_A.pdb	910 A	1.537
2aaxFH_A.pdb	942 A	1.539
2za0FH_A.pdb	19 A	1.525
2za0FH_A.pdb	20 A	1.533
2za0FH_A.pdb	139 A	1.533
3bhyFH_A.pdb	30 A	1.528
1u6eFH_A.pdb	23 A	1.527
1u6eFH_A.pdb	59 A	1.534
1u6eFH_A.pdb	154 A	1.539
2b4zFH_A.pdb	14 A	1.529
2b4zFH_A.pdb	17 A	1.524
2rfqFH_B.pdb	76 B	1.536
2rfqFH_B.pdb	142 B	1.534
3kaxFH_A.pdb	69 A	1.528
3kaxFH_A.pdb	131 A	1.52
3kaxFH_A.pdb	163 A	1.518
3kaxFH_A.pdb	185 A	1.523
3kaxFH_A.pdb	225 A	1.554
3kaxFH_A.pdb	280 A	1.541
3kaxFH_A.pdb	299 A	1.529
3kaxFH_A.pdb	324 A	1.554
3kaxFH_A.pdb	366 A	1.54
1xfkFH_A.pdb	31 A	1.535
1xfkFH_A.pdb	52 A	1.535
1xfkFH_A.pdb	95 A	1.532
1xfkFH_A.pdb	107 A	1.535
1xfkFH_A.pdb	187 A	1.529
1xfkFH_A.pdb	198 A	1.533
1xfkFH_A.pdb	246 A	1.534
1xfkFH_A.pdb	319 A	1.531
2gkeFH_A.pdb	38 A	1.527
2gkeFH_A.pdb	73 A	1.538
2gkeFH_A.pdb	79 A	1.534
2gkeFH_A.pdb	150 A	1.518
2gkeFH_A.pdb	160 A	1.55
2gkeFH_A.pdb	217 A	1.536
2gkeFH_A.pdb	222 A	1.516
3khyFH_A.pdb	9 A	1.532
3khyFH_A.pdb	40 A	1.525
3khyFH_A.pdb	110 A	1.534
3khyFH_A.pdb	128 A	1.532
3khyFH_A.pdb	205 A	1.544
3khyFH_A.pdb	236 A	1.529
3khyFH_A.pdb	270 A	1.53
3e2dFH_A.pdb	67 A	1.522
2quyFH_H.pdb	1 H	1.525
2quyFH_H.pdb	113 H	1.521
2quyFH_H.pdb	283 H	1.518
1nf8FH_A.pdb	66 A	1.536
1nf8FH_A.pdb	148 A	1.517
1nf8FH_A.pdb	196 A	1.538
3l12FH_A.pdb	135 A	1.533
3l12FH_A.pdb	195 A	1.518
3l12FH_A.pdb	249 A	1.534
1rypFH_J.pdb	11 J	1.528
1rypFH_J.pdb	16 J	1.526
1rypFH_J.pdb	120 J	1.517
1rypFH_J.pdb	141 J	1.525
1kdoFH_B.pdb	22 B	1.535
2rduFH_A.pdb	7 A	1.533
2rduFH_A.pdb	76 A	1.548
2rduFH_A.pdb	98 A	1.535
2rduFH_A.pdb	349 A	1.526
2fexFH_A.pdb	101 A	1.564
3p5pFH_A.pdb	187 A	1.524
3p5pFH_A.pdb	319 A	1.525
3p5pFH_A.pdb	329 A	1.53
3p5pFH_A.pdb	343 A	1.531
3p5pFH_A.pdb	346 A	1.532
3p5pFH_A.pdb	540 A	1.531
3p5pFH_A.pdb	607 A	1.53
3p5pFH_A.pdb	646 A	1.529
3p5pFH_A.pdb	650 A	1.525
3p5pFH_A.pdb	687 A	1.55
3p5pFH_A.pdb	719 A	1.533
3p5pFH_A.pdb	777 A	1.533
3p5pFH_A.pdb	795 A	1.525
3p5pFH_A.pdb	820 A	1.526
3p5pFH_A.pdb	830 A	1.532
3nznFH_B.pdb	32 B	1.534
3nznFH_B.pdb	35 B	1.562
3l51FH_A.pdb	585 A	1.527
3l51FH_A.pdb	630 A	1.535
2hlsFH_A.pdb	39 A	1.526
2hlsFH_A.pdb	42 A	1.526
2hlsFH_A.pdb	150 A	1.52
2hlsFH_A.pdb	153 A	1.525
2jhqFH_A.pdb	76 A	1.533
2jhqFH_A.pdb	200 A	1.541
3c4zFH_A.pdb	47 A	1.525
3c4zFH_A.pdb	62 A	1.526
3c4zFH_A.pdb	123 A	1.532
3c4zFH_A.pdb	204 A	1.522
3c4zFH_A.pdb	215 A	1.522
3c4zFH_A.pdb	261 A	1.522
3c4zFH_A.pdb	424 A	1.53
3c4zFH_A.pdb	443 A	1.539
3c4zFH_A.pdb	511 A	1.515
3igzFH_B.pdb	56 B	1.529
3igzFH_B.pdb	192 B	1.536
3igzFH_B.pdb	278 B	1.54
3igzFH_B.pdb	343 B	1.524
3igzFH_B.pdb	352 B	1.545
2q20FH_B.pdb	23 B	1.521
2q20FH_B.pdb	88 B	1.532
1cnvFH_A.pdb	23 A	1.535
1cnvFH_A.pdb	41 A	1.53
1cnvFH_A.pdb	54 A	1.538
1cnvFH_A.pdb	62 A	1.534
1cnvFH_A.pdb	72 A	1.53
1cnvFH_A.pdb	93 A	1.539
1cnvFH_A.pdb	165 A	1.539
1cnvFH_A.pdb	194 A	1.54
3f09FH_A.pdb	80 A	1.523
3korFH_D.pdb	27 D	1.54
3korFH_D.pdb	35 D	1.535
2hzeFH_B.pdb	26 B	1.51
2ousFH_A.pdb	451 A	1.533
2ousFH_A.pdb	469 A	1.533
2ousFH_A.pdb	498 A	1.536
2ousFH_A.pdb	502 A	1.534
2ousFH_A.pdb	509 A	1.531
2ousFH_A.pdb	536 A	1.533
2ousFH_A.pdb	560 A	1.539
2ousFH_A.pdb	562 A	1.537
2ousFH_A.pdb	673 A	1.526
2ousFH_A.pdb	676 A	1.53
2ousFH_A.pdb	737 A	1.529
2ousFH_A.pdb	755 A	1.534
2hxmFH_A.pdb	132 A	1.535
2hxmFH_A.pdb	157 A	1.528
2hxmFH_A.pdb	281 A	1.534
3hjbFH_A.pdb	402 A	1.531
3f5oFH_G.pdb	40 G	1.523
3f5oFH_G.pdb	74 G	1.529
2eveFH_A.pdb	54 A	1.531
2qedFH_A.pdb	24 A	1.531
2qedFH_A.pdb	116 A	1.518
2qedFH_A.pdb	125 A	1.524
2qedFH_A.pdb	134 A	1.524
2qedFH_A.pdb	162 A	1.517
2qedFH_A.pdb	163 A	1.52
2cftFH_A.pdb	4 A	1.528
2cftFH_A.pdb	26 A	1.54
2cftFH_A.pdb	91 A	1.52
2cftFH_A.pdb	163 A	1.516
2cftFH_A.pdb	171 A	1.534
2cftFH_A.pdb	221 A	1.542
2cftFH_A.pdb	250 A	1.544
3obiFH_C.pdb	12 C	1.523
3obiFH_C.pdb	101 C	1.543
3obiFH_C.pdb	190 C	1.518
2f7vFH_A.pdb	102 A	1.529
2f7vFH_A.pdb	137 A	1.539
2bkrFH_A.pdb	64 A	1.514
2bkrFH_A.pdb	163 A	1.547
2bkrFH_A.pdb	169 A	1.52
2bkrFH_A.pdb	175 A	1.502
1ekxFH_A.pdb	47 A	1.541
2iprFH_B.pdb	158 B	1.515
2iprFH_B.pdb	216 B	1.523
2iprFH_B.pdb	223 B	1.529
1xodFH_A.pdb	71 A	1.53
3cryFH_A.pdb	42 A	1.527
3cryFH_A.pdb	122 A	1.534
3cryFH_A.pdb	144 A	1.528
3h87FH_B.pdb	65 B	1.55
2cjpFH_A.pdb	115 A	1.535
1jl3FH_D.pdb	10 D	1.527
1jl3FH_D.pdb	15 D	1.531
1jl3FH_D.pdb	82 D	1.528
3nt1FH_B.pdb	36 B	1.535
3nt1FH_B.pdb	37 B	1.534
3nt1FH_B.pdb	41 B	1.53
3nt1FH_B.pdb	47 B	1.531
3nt1FH_B.pdb	57 B	1.524
3nt1FH_B.pdb	59 B	1.533
3nt1FH_B.pdb	69 B	1.537
3nt1FH_B.pdb	159 B	1.529
3nt1FH_B.pdb	313 B	1.53
3nt1FH_B.pdb	540 B	1.531
3nt1FH_B.pdb	569 B	1.536
3nt1FH_B.pdb	575 B	1.539
3m8oFH_H.pdb	22 H	1.536
3m8oFH_H.pdb	98 H	1.532
3m8oFH_H.pdb	133 H	1.521
3m8oFH_H.pdb	145 H	1.542
3m8oFH_H.pdb	196 H	1.533
3m8oFH_H.pdb	204 H	1.529
3m8oFH_H.pdb	220 H	1.532
3oc9FH_A.pdb	123 A	1.553
3oc9FH_A.pdb	187 A	1.536
3oc9FH_A.pdb	206 A	1.546
3oc9FH_A.pdb	254 A	1.555
3oc9FH_A.pdb	373 A	1.534
3lf5FH_B.pdb	71 B	1.523
3lf5FH_B.pdb	74 B	1.513
3lf5FH_B.pdb	124 B	1.548
3g46FH_B.pdb	92 B	1.519
1mplFH_A.pdb	291 A	1.528
1mplFH_A.pdb	344 A	1.537
3l80FH_A.pdb	19 A	1.515
3l80FH_A.pdb	26 A	1.538
3l80FH_A.pdb	98 A	1.532
3l80FH_A.pdb	118 A	1.528
3l80FH_A.pdb	184 A	1.524
3l80FH_A.pdb	247 A	1.536
1bteFH_A.pdb	11 A	1.553
1bteFH_A.pdb	31 A	1.519
1bteFH_A.pdb	41 A	1.536
1bteFH_A.pdb	59 A	1.55
1bteFH_A.pdb	66 A	1.535
1bteFH_A.pdb	72 A	1.556
1bteFH_A.pdb	84 A	1.52
1bteFH_A.pdb	85 A	1.499
1bteFH_A.pdb	86 A	1.533
1bteFH_A.pdb	91 A	1.546
2nwvFH_A.pdb	33 A	1.533
3ka4FH_A.pdb	12 A	1.508
3ka4FH_A.pdb	126 A	1.485
2j8bFH_A.pdb	3 A	1.536
2j8bFH_A.pdb	6 A	1.548
2j8bFH_A.pdb	13 A	1.524
2j8bFH_A.pdb	19 A	1.529
2j8bFH_A.pdb	26 A	1.542
2j8bFH_A.pdb	39 A	1.533
2j8bFH_A.pdb	45 A	1.514
2j8bFH_A.pdb	63 A	1.517
2j8bFH_A.pdb	64 A	1.528
2j8bFH_A.pdb	69 A	1.528
3a8uFH_X.pdb	62 X	1.531
3a8uFH_X.pdb	122 X	1.525
3a8uFH_X.pdb	249 X	1.525
3a8uFH_X.pdb	285 X	1.52
3a8uFH_X.pdb	335 X	1.529
3a8uFH_X.pdb	343 X	1.528
3ka7FH_A.pdb	67 A	1.521
3ka7FH_A.pdb	159 A	1.525
3ka7FH_A.pdb	195 A	1.522
3ka7FH_A.pdb	257 A	1.532
3ka7FH_A.pdb	285 A	1.527
3ka7FH_A.pdb	330 A	1.524
3co8FH_A.pdb	57 A	1.529
3co8FH_A.pdb	216 A	1.541
3co8FH_A.pdb	305 A	1.527
3gnzFH_P.pdb	37 P	1.519
3gnzFH_P.pdb	63 P	1.536
1vl4FH_A.pdb	75 A	1.5
3bbbFH_D.pdb	109 D	1.515
3bbbFH_D.pdb	145 D	1.524
1c7nFH_F.pdb	140 F	1.524
1c7nFH_F.pdb	171 F	1.536
1c7nFH_F.pdb	281 F	1.531
1c7nFH_F.pdb	284 F	1.53
1c7nFH_F.pdb	288 F	1.532
1c7nFH_F.pdb	295 F	1.532
2p3pFH_B.pdb	72 B	1.533
2p3pFH_B.pdb	93 B	1.529
2p3pFH_B.pdb	150 B	1.517
3mqqFH_A.pdb	28 A	1.542
3mqqFH_A.pdb	38 A	1.53
3mqqFH_A.pdb	91 A	1.544
2i5iFH_B.pdb	202 B	1.536
2i5iFH_B.pdb	212 B	1.525
2i5iFH_B.pdb	228 B	1.531
3hhiFH_B.pdb	107 B	1.54
3hhiFH_B.pdb	119 B	1.553
3hhiFH_B.pdb	122 B	1.541
3hhiFH_B.pdb	136 B	1.533
3hhiFH_B.pdb	154 B	1.534
3hhiFH_B.pdb	155 B	1.517
3hhiFH_B.pdb	158 B	1.545
3hhiFH_B.pdb	162 B	1.556
3hhiFH_B.pdb	184 B	1.549
3hhiFH_B.pdb	192 B	1.521
3hhiFH_B.pdb	205 B	1.511
3hhiFH_B.pdb	215 B	1.506
3hhiFH_B.pdb	219 B	1.562
3hhiFH_B.pdb	323 B	1.544
1zzwFH_A.pdb	400 A	1.529
1zzwFH_A.pdb	408 A	1.553
3h7hFH_B.pdb	184 B	1.534
3nepFH_X.pdb	39 X	1.54
3nepFH_X.pdb	94 X	1.519
3nepFH_X.pdb	271 X	1.527
3nepFH_X.pdb	275 X	1.518
1uv4FH_A.pdb	205 A	1.528
1uv4FH_A.pdb	206 A	1.53
2gb4FH_B.pdb	65 B	1.528
2gb4FH_B.pdb	127 B	1.541
2gb4FH_B.pdb	128 B	1.524
2gb4FH_B.pdb	207 B	1.547
2gb4FH_B.pdb	211 B	1.533
1s5mFH_A.pdb	305 A	1.527
3fjvFH_A.pdb	168 A	1.529
3fvuFH_B.pdb	127 B	1.544
3fvuFH_B.pdb	203 B	1.528
3fvuFH_B.pdb	210 B	1.518
3fvuFH_B.pdb	280 B	1.527
3fvuFH_B.pdb	316 B	1.528
3fvuFH_B.pdb	400 B	1.516
2etxFH_A.pdb	1939 A	1.521
2etxFH_A.pdb	2020 A	1.52
2etxFH_A.pdb	2021 A	1.524
2etxFH_A.pdb	2042 A	1.533
2etxFH_A.pdb	2049 A	1.533
1vp8FH_A.pdb	131 A	1.531
1vp8FH_A.pdb	183 A	1.527
3dhaFH_A.pdb	18 A	1.52
3dhaFH_A.pdb	41 A	1.506
3dhaFH_A.pdb	145 A	1.513
3dhaFH_A.pdb	247 A	1.56
1mb4FH_A.pdb	71 A	1.531
1mb4FH_A.pdb	134 A	1.528
1mb4FH_A.pdb	265 A	1.53
1mb4FH_A.pdb	273 A	1.53
1worFH_A.pdb	87 A	1.532
1worFH_A.pdb	230 A	1.534
3a2zFH_A.pdb	59 A	1.56
3a2zFH_A.pdb	173 A	1.529
1v7pFH_C.pdb	150 C	1.528
1v7pFH_C.pdb	270 C	1.531
2dtxFH_A.pdb	52 A	1.536
2dtxFH_A.pdb	169 A	1.538
2dtxFH_A.pdb	173 A	1.555
2dtxFH_A.pdb	238 A	1.538
3pmtFH_A.pdb	562 A	1.536
1r26FH_A.pdb	30 A	1.527
1r26FH_A.pdb	33 A	1.522
1r26FH_A.pdb	67 A	1.542
3i6cFH_A.pdb	57 A	1.547
3i6cFH_A.pdb	113 A	1.541
2nl9FH_A.pdb	286 A	1.532
3lmpFH_A.pdb	285 A	1.528
3nofFH_B.pdb	37 B	1.56
2hfnFH_H.pdb	45 H	1.529
2hfnFH_H.pdb	59 H	1.536
2hfnFH_H.pdb	83 H	1.531
2hfnFH_H.pdb	132 H	1.528
3fotFH_A.pdb	33 A	1.539
3fotFH_A.pdb	92 A	1.534
3fotFH_A.pdb	94 A	1.537
3fotFH_A.pdb	124 A	1.533
3fotFH_A.pdb	194 A	1.538
3fotFH_A.pdb	252 A	1.54
3fotFH_A.pdb	279 A	1.534
3fotFH_A.pdb	357 A	1.534
3fotFH_A.pdb	390 A	1.521
3ejfFH_A.pdb	15 A	1.525
3ejfFH_A.pdb	34 A	1.526
3ejfFH_A.pdb	57 A	1.531
3ejfFH_A.pdb	65 A	1.524
3ejfFH_A.pdb	89 A	1.537
3ejfFH_A.pdb	150 A	1.521
3ejfFH_A.pdb	171 A	1.524
2zs0FH_A.pdb	2 A	1.531
2zs0FH_A.pdb	63 A	1.528
2zs0FH_A.pdb	121 A	1.531
2zs0FH_A.pdb	130 A	1.537
2v9tFH_B.pdb	273 B	1.543
2v9tFH_B.pdb	277 B	1.532
2v9tFH_B.pdb	279 B	1.519
2v9tFH_B.pdb	286 B	1.518
2v9tFH_B.pdb	386 B	1.52
2v9tFH_B.pdb	434 B	1.529
2v9tFH_B.pdb	436 B	1.548
2v9tFH_B.pdb	457 B	1.527
2v9tFH_B.pdb	478 B	1.512
2bdrFH_A.pdb	150 A	1.538
2bcmFH_B.pdb	19 B	1.531
2bcmFH_B.pdb	51 B	1.538
1o5xFH_A.pdb	13 A	1.537
1o5xFH_A.pdb	126 A	1.54
1o5xFH_A.pdb	196 A	1.531
1o5xFH_A.pdb	217 A	1.547
1jkgFH_A.pdb	14 A	1.528
1jkgFH_A.pdb	77 A	1.53
1jkgFH_A.pdb	96 A	1.529
1jkgFH_A.pdb	132 A	1.533
2ivnFH_A.pdb	108 A	1.529
2ivnFH_A.pdb	283 A	1.527
3bzwFH_A.pdb	38 A	1.531
3bzwFH_A.pdb	60 A	1.529
3bzwFH_A.pdb	210 A	1.545
3bldFH_A.pdb	158 A	1.522
3bldFH_A.pdb	318 A	1.55
3bldFH_A.pdb	320 A	1.545
3bldFH_A.pdb	323 A	1.525
1xruFH_B.pdb	95 B	1.531
1xruFH_B.pdb	130 B	1.532
1xruFH_B.pdb	175 B	1.527
1xruFH_B.pdb	195 B	1.525
1xruFH_B.pdb	215 B	1.532
1xruFH_B.pdb	278 B	1.531
3m6zFH_A.pdb	68 A	1.529
3m6zFH_A.pdb	297 A	1.531
3m6zFH_A.pdb	314 A	1.52
3m6zFH_A.pdb	338 A	1.528
2os5FH_A.pdb	83 A	1.523
2f5vFH_A.pdb	59 A	1.529
2f5vFH_A.pdb	170 A	1.534
2f5vFH_A.pdb	283 A	1.512
2f5vFH_A.pdb	364 A	1.528
2f5vFH_A.pdb	523 A	1.518
2f5vFH_A.pdb	564 A	1.542
2f5vFH_A.pdb	565 A	1.519
2f5vFH_A.pdb	583 A	1.525
2f5vFH_A.pdb	606 A	1.521
3c3mFH_A.pdb	38 A	1.541
1fehFH_A.pdb	34 A	1.531
1fehFH_A.pdb	39 A	1.523
1fehFH_A.pdb	46 A	1.529
1fehFH_A.pdb	49 A	1.517
1fehFH_A.pdb	62 A	1.518
1fehFH_A.pdb	98 A	1.524
1fehFH_A.pdb	101 A	1.517
1fehFH_A.pdb	107 A	1.507
1fehFH_A.pdb	147 A	1.532
1fehFH_A.pdb	150 A	1.522
1fehFH_A.pdb	153 A	1.525
1fehFH_A.pdb	157 A	1.522
1fehFH_A.pdb	184 A	1.523
1fehFH_A.pdb	190 A	1.526
1fehFH_A.pdb	193 A	1.526
1fehFH_A.pdb	196 A	1.524
1fehFH_A.pdb	200 A	1.526
1fehFH_A.pdb	299 A	1.526
1fehFH_A.pdb	300 A	1.538
1fehFH_A.pdb	355 A	1.514
1fehFH_A.pdb	499 A	1.536
1fehFH_A.pdb	503 A	1.517
3lwgFH_B.pdb	15 B	1.526
3lwgFH_B.pdb	23 B	1.547
3lwgFH_B.pdb	37 B	1.539
3lwgFH_B.pdb	66 B	1.54
3hjeFH_A.pdb	338 A	1.535
3hjeFH_A.pdb	360 A	1.531
3hjeFH_A.pdb	418 A	1.535
3hjeFH_A.pdb	653 A	1.536
2bmeFH_B.pdb	25 B	1.507
2bmeFH_B.pdb	121 B	1.52
2bmeFH_B.pdb	167 B	1.552
3fp2FH_A.pdb	170 A	1.518
3fp2FH_A.pdb	349 A	1.544
3fp2FH_A.pdb	454 A	1.555
3fp2FH_A.pdb	557 A	1.532
1nbcFH_B.pdb	55 B	1.529
3n29FH_B.pdb	22 B	1.507
3n29FH_B.pdb	59 B	1.531
3n29FH_B.pdb	61 B	1.527
3n29FH_B.pdb	124 B	1.545
3n29FH_B.pdb	169 B	1.526
3n29FH_B.pdb	219 B	1.534
3n29FH_B.pdb	313 B	1.542
3kl6FH_B.pdb	1 B	1.533
3kl6FH_B.pdb	8 B	1.53
3kl6FH_B.pdb	12 B	1.528
3kl6FH_B.pdb	21 B	1.532
3kl6FH_B.pdb	23 B	1.534
3kl6FH_B.pdb	36 B	1.529
3kl6FH_B.pdb	44 B	1.526
2w2jFH_A.pdb	77 A	1.521
2w2jFH_A.pdb	80 A	1.526
2w2jFH_A.pdb	200 A	1.537
2w2jFH_A.pdb	227 A	1.539
2w2jFH_A.pdb	266 A	1.53
2o8pFH_A.pdb	26 A	1.518
2o8pFH_A.pdb	59 A	1.521
2o8pFH_A.pdb	91 A	1.536
2o8pFH_A.pdb	112 A	1.537
2o8pFH_A.pdb	144 A	1.531
2o8pFH_A.pdb	161 A	1.537
3dczFH_A.pdb	120 A	1.548
3p1wFH_A.pdb	17 A	1.501
3p1wFH_A.pdb	148 A	1.53
3p1wFH_A.pdb	186 A	1.527
3p1wFH_A.pdb	250 A	1.517
3p1wFH_A.pdb	275 A	1.533
3p1wFH_A.pdb	287 A	1.536
3p1wFH_A.pdb	292 A	1.524
3p1wFH_A.pdb	313 A	1.539
3p1wFH_A.pdb	315 A	1.52
3p1wFH_A.pdb	330 A	1.561
3ag3FH_E.pdb	55 E	1.496
2j7uFH_A.pdb	393 A	1.53
2j7uFH_A.pdb	446 A	1.53
2j7uFH_A.pdb	449 A	1.529
2j7uFH_A.pdb	665 A	1.53
2j7uFH_A.pdb	709 A	1.533
2j7uFH_A.pdb	728 A	1.535
2j7uFH_A.pdb	753 A	1.529
2j7uFH_A.pdb	780 A	1.528
2j7uFH_A.pdb	847 A	1.524
3m3hFH_A.pdb	35 A	1.53
3m3hFH_A.pdb	91 A	1.521
3m3hFH_A.pdb	132 A	1.527
3m3hFH_A.pdb	141 A	1.509
2xauFH_A.pdb	145 A	1.551
2xauFH_A.pdb	211 A	1.559
2xauFH_A.pdb	336 A	1.53
2xauFH_A.pdb	436 A	1.532
2xauFH_A.pdb	503 A	1.533
2xauFH_A.pdb	538 A	1.536
2xauFH_A.pdb	603 A	1.546
3qgzFH_A.pdb	38 A	1.536
3qgzFH_A.pdb	84 A	1.519
2iwrFH_A.pdb	206 A	1.512
2w98FH_B.pdb	54 B	1.523
2w98FH_B.pdb	167 B	1.528
2w98FH_B.pdb	180 B	1.525
2w98FH_B.pdb	187 B	1.531
2w98FH_B.pdb	193 B	1.529
2w98FH_B.pdb	221 B	1.535
2w98FH_B.pdb	253 B	1.519
2w98FH_B.pdb	344 B	1.516
1wdrFH_A.pdb	82 A	1.531
1wdrFH_A.pdb	95 A	1.52
1wdrFH_A.pdb	208 A	1.505
1wdrFH_A.pdb	343 A	1.553
1wdrFH_A.pdb	448 A	1.514
1sznFH_A.pdb	24 A	1.541
1sznFH_A.pdb	56 A	1.493
1sznFH_A.pdb	104 A	1.512
1sznFH_A.pdb	134 A	1.54
1sznFH_A.pdb	147 A	1.533
1sznFH_A.pdb	160 A	1.518
1sznFH_A.pdb	203 A	1.535
1sznFH_A.pdb	392 A	1.544
1sznFH_A.pdb	414 A	1.523
3hxiFH_A.pdb	46 A	1.531
3hxiFH_A.pdb	136 A	1.524
3hxiFH_A.pdb	197 A	1.526
2j0vFH_C.pdb	9 C	1.54
2j0vFH_C.pdb	21 C	1.524
2j0vFH_C.pdb	25 C	1.533
2j0vFH_C.pdb	156 C	1.525
3a9iFH_A.pdb	75 A	1.537
3a9iFH_A.pdb	202 A	1.545
1lqtFH_A.pdb	245 A	1.511
1lqtFH_A.pdb	395 A	1.517
2f9sFH_B.pdb	74 B	1.525
2f9sFH_B.pdb	77 B	1.546
2ga8FH_A.pdb	26 A	1.531
2ga8FH_A.pdb	170 A	1.532
2ga8FH_A.pdb	199 A	1.526
2ga8FH_A.pdb	255 A	1.527
3f3zFH_A.pdb	105 A	1.537
3f3zFH_A.pdb	139 A	1.538
3f3zFH_A.pdb	205 A	1.535
3f3zFH_A.pdb	219 A	1.529
2ab0FH_A.pdb	8 A	1.531
2ab0FH_A.pdb	47 A	1.538
2ab0FH_A.pdb	81 A	1.538
2ab0FH_A.pdb	106 A	1.535
1uc4FH_A.pdb	92 A	1.538
1uc4FH_A.pdb	201 A	1.529
1uc4FH_A.pdb	218 A	1.527
1uc4FH_A.pdb	283 A	1.53
1uc4FH_A.pdb	302 A	1.531
1uc4FH_A.pdb	323 A	1.535
1uc4FH_A.pdb	330 A	1.537
2xdaFH_A.pdb	122 A	1.535
3bwuFH_F.pdb	16 F	1.528
3bwuFH_F.pdb	56 F	1.53
3nj2FH_A.pdb	91 A	1.507
3nj2FH_A.pdb	108 A	1.527
2fctFH_A.pdb	80 A	1.535
2fctFH_A.pdb	85 A	1.517
2fctFH_A.pdb	98 A	1.52
2fctFH_A.pdb	157 A	1.523
3fasFH_B.pdb	34 B	1.528
3fasFH_B.pdb	204 B	1.534
3fasFH_B.pdb	259 B	1.542
3fy1FH_B.pdb	26 B	1.529
3fy1FH_B.pdb	49 B	1.534
3fy1FH_B.pdb	51 B	1.53
3fy1FH_B.pdb	307 B	1.526
3fy1FH_B.pdb	372 B	1.529
3fy1FH_B.pdb	394 B	1.568
2xedFH_A.pdb	60 A	1.532
2xedFH_A.pdb	76 A	1.526
2xedFH_A.pdb	168 A	1.535
2xedFH_A.pdb	193 A	1.531
3cnyFH_A.pdb	95 A	1.536
3cnyFH_A.pdb	139 A	1.538
3cnyFH_A.pdb	227 A	1.556
1rfsFH_A.pdb	107 A	1.527
1rfsFH_A.pdb	112 A	1.518
1rfsFH_A.pdb	125 A	1.533
1rfsFH_A.pdb	127 A	1.522
1rfsFH_A.pdb	152 A	1.539
3d34FH_A.pdb	9 A	1.53
3d34FH_A.pdb	145 A	1.526
1k0mFH_A.pdb	24 A	1.528
1k0mFH_A.pdb	59 A	1.53
1k0mFH_A.pdb	89 A	1.53
1k0mFH_A.pdb	178 A	1.549
1k0mFH_A.pdb	191 A	1.547
1k0mFH_A.pdb	223 A	1.548
1jfbFH_A.pdb	52 A	1.534
1jfbFH_A.pdb	133 A	1.524
1jfbFH_A.pdb	215 A	1.542
1jfbFH_A.pdb	280 A	1.532
1jfbFH_A.pdb	352 A	1.527
2qa1FH_A.pdb	151 A	1.533
2qa1FH_A.pdb	214 A	1.533
3odvFH_A.pdb	8 A	1.533
3odvFH_A.pdb	14 A	1.52
3odvFH_A.pdb	18 A	1.525
3odvFH_A.pdb	28 A	1.522
3odvFH_A.pdb	33 A	1.522
3odvFH_A.pdb	35 A	1.533
3hjzFH_A.pdb	156 A	1.542
3hjzFH_A.pdb	165 A	1.544
3hjzFH_A.pdb	170 A	1.547
3hjzFH_A.pdb	242 A	1.533
2yxmFH_A.pdb	61 A	1.529
2yxmFH_A.pdb	70 A	1.532
2yxmFH_A.pdb	87 A	1.533
2nxwFH_A.pdb	191 A	1.529
2nxwFH_A.pdb	210 A	1.531
2nxwFH_A.pdb	383 A	1.533
2nxwFH_A.pdb	416 A	1.532
2nxwFH_A.pdb	442 A	1.527
1f7bFH_C.pdb	102 C	1.495
1f7bFH_C.pdb	268 C	1.528
1ig3FH_A.pdb	40 A	1.521
1ig3FH_A.pdb	64 A	1.531
1ig3FH_A.pdb	108 A	1.528
1ig3FH_A.pdb	124 A	1.539
1ig3FH_A.pdb	203 A	1.54
1ig3FH_A.pdb	212 A	1.518
2tnfFH_B.pdb	69 B	1.533
2tnfFH_B.pdb	101 B	1.539
2ozvFH_A.pdb	46 A	1.531
2ozvFH_A.pdb	190 A	1.546
3mvkFH_G.pdb	18 G	1.521
3mvkFH_G.pdb	124 G	1.521
2nyiFH_B.pdb	40 B	1.536
3muxFH_B.pdb	182 B	1.529
1vkeFH_F.pdb	59 F	1.507
1vkeFH_F.pdb	62 F	1.517
1vkeFH_F.pdb	70 F	1.535
1v5fFH_A.pdb	537 A	1.534
3fpcFH_A.pdb	37 A	1.518
3fpcFH_A.pdb	171 A	1.543
3fpcFH_A.pdb	203 A	1.528
3fpcFH_A.pdb	204 A	1.519
3fpcFH_A.pdb	295 A	1.528
1odoFH_A.pdb	354 A	1.523
3o41FH_A.pdb	22 A	1.529
3o41FH_A.pdb	92 A	1.539
3o41FH_A.pdb	140 A	1.529
3o41FH_A.pdb	195 A	1.526
2vsmFH_A.pdb	189 A	1.532
2vsmFH_A.pdb	216 A	1.533
2vsmFH_A.pdb	240 A	1.531
2vsmFH_A.pdb	282 A	1.515
2vsmFH_A.pdb	295 A	1.533
2vsmFH_A.pdb	382 A	1.529
2vsmFH_A.pdb	387 A	1.525
2vsmFH_A.pdb	395 A	1.529
2vsmFH_A.pdb	493 A	1.525
2vsmFH_A.pdb	499 A	1.523
2vsmFH_A.pdb	503 A	1.543
2vsmFH_A.pdb	565 A	1.53
2vsmFH_A.pdb	574 A	1.521
2vsmFH_A.pdb	601 A	1.531
3g39FH_A.pdb	2 A	1.517
3g39FH_A.pdb	6 A	1.495
3g39FH_A.pdb	8 A	1.524
3g39FH_A.pdb	15 A	1.535
3g39FH_A.pdb	115 A	1.52
3g39FH_A.pdb	117 A	1.53
3g39FH_A.pdb	147 A	1.526
3g39FH_A.pdb	167 A	1.528
1qb5FH_E.pdb	10 E	1.526
1qb5FH_E.pdb	81 E	1.517
2wsoFH_A.pdb	48 A	1.509
2wsoFH_A.pdb	70 A	1.532
3jsyFH_B.pdb	124 B	1.531
2vxrFH_A.pdb	962 A	1.514
2vxrFH_A.pdb	1055 A	1.515
2vxrFH_A.pdb	1229 A	1.503
2vxrFH_A.pdb	1233 A	1.522
2vxrFH_A.pdb	1264 A	1.526
2vxrFH_A.pdb	1284 A	1.536
3lhqFH_A.pdb	117 A	1.521
3lhqFH_A.pdb	134 A	1.52
3lhqFH_A.pdb	148 A	1.531
3lhqFH_A.pdb	205 A	1.534
2j23FH_A.pdb	30 A	1.519
2j23FH_A.pdb	33 A	1.56
1edgFH_A.pdb	110 A	1.53
1edgFH_A.pdb	195 A	1.53
1edgFH_A.pdb	221 A	1.534
1edgFH_A.pdb	257 A	1.53
1edgFH_A.pdb	308 A	1.538
1edgFH_A.pdb	337 A	1.525
1edgFH_A.pdb	360 A	1.531
1c4qFH_B.pdb	204 B	1.539
1c4qFH_B.pdb	257 B	1.535
3otlFH_A.pdb	40 A	1.533
1xs5FH_A.pdb	224 A	1.502
1xqoFH_A.pdb	36 A	1.512
1xqoFH_A.pdb	85 A	1.525
1xqoFH_A.pdb	113 A	1.545
1xqoFH_A.pdb	155 A	1.485
1xqoFH_A.pdb	181 A	1.518
1xqoFH_A.pdb	251 A	1.537
2f5xFH_A.pdb	142 A	1.518
2f5xFH_A.pdb	178 A	1.524
2o5uFH_A.pdb	70 A	1.552
2o5uFH_A.pdb	111 A	1.531
2vfqFH_A.pdb	169 A	1.527
2vfqFH_A.pdb	267 A	1.52
2vfqFH_A.pdb	287 A	1.519
2vfqFH_A.pdb	290 A	1.524
2vfqFH_A.pdb	458 A	1.527
2vfqFH_A.pdb	496 A	1.523
2vfqFH_A.pdb	613 A	1.521
2vfqFH_A.pdb	635 A	1.535
3o0gFH_D.pdb	154 D	1.525
3o0gFH_D.pdb	160 D	1.53
3o0gFH_D.pdb	163 D	1.521
3o0gFH_D.pdb	208 D	1.538
3o0gFH_D.pdb	229 D	1.536
3o0gFH_D.pdb	253 D	1.53
3o0gFH_D.pdb	261 D	1.53
3dr0FH_C.pdb	14 C	1.529
3dr0FH_C.pdb	17 C	1.523
3dnpFH_A.pdb	101 A	1.531
2ddrFH_A.pdb	123 A	1.53
2vchFH_A.pdb	160 A	1.532
2vchFH_A.pdb	174 A	1.522
2vchFH_A.pdb	258 A	1.55
2vchFH_A.pdb	283 A	1.53
2vchFH_A.pdb	365 A	1.537
2vchFH_A.pdb	447 A	1.528
3giuFH_A.pdb	141 A	1.533
3klrFH_A.pdb	37 A	1.515
3klrFH_A.pdb	90 A	1.53
2a15FH_A.pdb	19 A	1.513
2a15FH_A.pdb	77 A	1.522
2zm0FH_A.pdb	118 A	1.527
2zm0FH_A.pdb	216 A	1.53
2zm0FH_A.pdb	271 A	1.535
2zm0FH_A.pdb	332 A	1.528
2r7hFH_A.pdb	65 A	1.523
2r7hFH_A.pdb	83 A	1.532
1ytqFH_A.pdb	37 A	1.529
1ytqFH_A.pdb	66 A	1.536
1xy7FH_B.pdb	85 B	1.506
2hzlFH_B.pdb	93 B	1.534
2hzlFH_B.pdb	94 B	1.533
2hzlFH_B.pdb	269 B	1.53
2hzlFH_B.pdb	309 B	1.528
3i6yFH_A.pdb	28 A	1.545
3i6yFH_A.pdb	57 A	1.535
3i6yFH_A.pdb	180 A	1.546
3c18FH_A.pdb	119 A	1.532
2d1cFH_A.pdb	34 A	1.53
2d1cFH_A.pdb	188 A	1.529
2d1cFH_A.pdb	446 A	1.529
3qy3FH_A.pdb	110 A	1.552
3b9gFH_A.pdb	36 A	1.528
3b9gFH_A.pdb	41 A	1.535
3b9gFH_A.pdb	55 A	1.523
3b9gFH_A.pdb	85 A	1.538
3b9gFH_A.pdb	135 A	1.532
3b9gFH_A.pdb	146 A	1.523
3b9gFH_A.pdb	161 A	1.527
3b9gFH_A.pdb	200 A	1.525
3b9gFH_A.pdb	317 A	1.54
2dc1FH_B.pdb	1098 B	1.531
2w4iFH_F.pdb	70 F	1.532
2w4iFH_F.pdb	162 F	1.541
2w4iFH_F.pdb	181 F	1.517
2w4iFH_F.pdb	229 F	1.527
1xvgFH_C.pdb	302 C	1.531
3cxnFH_B.pdb	193 B	1.524
3cxnFH_B.pdb	231 B	1.544
3afmFH_A.pdb	72 A	1.528
3idaFH_A.pdb	107 A	1.536
3idaFH_A.pdb	429 A	1.541
3idaFH_A.pdb	477 A	1.536
3idaFH_A.pdb	551 A	1.537
1vl7FH_A.pdb	91 A	1.513
1p1xFH_B.pdb	1033 B	1.537
1p1xFH_B.pdb	1047 B	1.553
1p1xFH_B.pdb	1125 B	1.538
1p1xFH_B.pdb	1129 B	1.541
1wbiFH_H.pdb	4 H	1.539
1wbiFH_H.pdb	81 H	1.507
3p1gFH_A.pdb	635 A	1.537
2w1vFH_A.pdb	63 A	1.529
2w1vFH_A.pdb	82 A	1.539
2w1vFH_A.pdb	135 A	1.53
2w1vFH_A.pdb	184 A	1.53
2w1vFH_A.pdb	191 A	1.519
2w1vFH_A.pdb	208 A	1.522
2posFH_D.pdb	7 D	1.53
2posFH_D.pdb	27 D	1.53
2posFH_D.pdb	51 D	1.527
2posFH_D.pdb	56 D	1.53
2posFH_D.pdb	71 D	1.536
2posFH_D.pdb	93 D	1.529
1zk4FH_A.pdb	173 A	1.533
1zk4FH_A.pdb	226 A	1.534
2wnfFH_A.pdb	62 A	1.553
2wnfFH_A.pdb	64 A	1.519
2wnfFH_A.pdb	67 A	1.547
2wnfFH_A.pdb	142 A	1.544
2wnfFH_A.pdb	145 A	1.554
2wnfFH_A.pdb	284 A	1.547
3c1oFH_A.pdb	113 A	1.526
3c1oFH_A.pdb	152 A	1.527
3c1oFH_A.pdb	201 A	1.533
3c1oFH_A.pdb	205 A	1.53
3c1oFH_A.pdb	206 A	1.529
1ryqFH_A.pdb	6 A	1.523
1ryqFH_A.pdb	9 A	1.539
1ryqFH_A.pdb	18 A	1.518
1ryqFH_A.pdb	21 A	1.536
3ehwFH_B.pdb	78 B	1.538
3ehwFH_B.pdb	134 B	1.517
2oqbFH_A.pdb	79 A	1.54
2oqbFH_A.pdb	83 A	1.527
2oqbFH_A.pdb	91 A	1.54
2oqbFH_A.pdb	105 A	1.531
2oqbFH_A.pdb	119 A	1.527
2oqbFH_A.pdb	128 A	1.529
2hszFH_B.pdb	63 B	1.519
2hszFH_B.pdb	91 B	1.533
2hszFH_B.pdb	161 B	1.521
2hszFH_B.pdb	189 B	1.552
1akyFH_A.pdb	82 A	1.528
2d2rFH_B.pdb	44 B	1.519
2d2rFH_B.pdb	51 B	1.589
3ouiFH_A.pdb	201 A	1.511
3ouiFH_A.pdb	208 A	1.514
3ouiFH_A.pdb	266 A	1.535
3ouiFH_A.pdb	283 A	1.541
3ouiFH_A.pdb	302 A	1.55
3ouiFH_A.pdb	323 A	1.529
3ouiFH_A.pdb	326 A	1.521
3fr7FH_A.pdb	250 A	1.531
3fr7FH_A.pdb	395 A	1.53
3fr7FH_A.pdb	402 A	1.515
3fr7FH_A.pdb	517 A	1.543
3fr7FH_A.pdb	570 A	1.52
1kveFH_D.pdb	190 D	1.528
1kveFH_D.pdb	219 D	1.492
2bcgFH_Y.pdb	23 Y	1.527
2bcgFH_Y.pdb	123 Y	1.545
1h2eFH_A.pdb	124 A	1.527
1wcfFH_A.pdb	94 A	1.527
1ve1FH_A.pdb	286 A	1.536
3ldvFH_B.pdb	30 B	1.529
3ldvFH_B.pdb	70 B	1.513
3ldvFH_B.pdb	157 B	1.533
1r6dFH_A.pdb	113 A	1.542
1r6dFH_A.pdb	178 A	1.536
1r6dFH_A.pdb	179 A	1.565
1r6dFH_A.pdb	224 A	1.557
2r8qFH_A.pdb	659 A	1.531
2r8qFH_A.pdb	671 A	1.535
2r8qFH_A.pdb	690 A	1.532
2r8qFH_A.pdb	711 A	1.529
2r8qFH_A.pdb	758 A	1.53
2r8qFH_A.pdb	791 A	1.529
2r8qFH_A.pdb	913 A	1.528
2y5sFH_B.pdb	11 B	1.533
2y5sFH_B.pdb	142 B	1.508
2y5sFH_B.pdb	189 B	1.52
2y5sFH_B.pdb	258 B	1.527
3b9dFH_A.pdb	116 A	1.532
3b9dFH_A.pdb	121 A	1.531
3b9dFH_A.pdb	196 A	1.528
3b9dFH_A.pdb	217 A	1.527
3b9dFH_A.pdb	409 A	1.527
3b9dFH_A.pdb	418 A	1.529
2xm4FH_A.pdb	116 A	1.532
2xm4FH_A.pdb	119 A	1.511
2e0qFH_A.pdb	64 A	1.532
2e0qFH_A.pdb	67 A	1.52
3ir8FH_A.pdb	101 A	1.552
3ir8FH_A.pdb	113 A	1.543
3ir8FH_A.pdb	171 A	1.542
3ir8FH_A.pdb	210 A	1.529
2as0FH_A.pdb	334 A	1.531
2as0FH_A.pdb	336 A	1.529
2as0FH_A.pdb	387 A	1.532
1llfFH_B.pdb	1060 B	1.521
1llfFH_B.pdb	1097 B	1.551
1llfFH_B.pdb	1217 B	1.537
1llfFH_B.pdb	1268 B	1.529
1llfFH_B.pdb	1277 B	1.532
3mt0FH_A.pdb	40 A	1.525
3mt0FH_A.pdb	87 A	1.531
3mt0FH_A.pdb	118 A	1.54
3mt0FH_A.pdb	201 A	1.53
3b79FH_A.pdb	79 A	1.539
2b1vFH_A.pdb	447 A	1.538
2qniFH_A.pdb	172 A	1.525
2qniFH_A.pdb	209 A	1.538
1wu9FH_B.pdb	228 B	1.529
3gzrFH_B.pdb	94 B	1.53
3oj6FH_B.pdb	57 B	1.533
3oj6FH_B.pdb	91 B	1.537
3oj6FH_B.pdb	94 B	1.531
1eisFH_A.pdb	3 A	1.564
1eisFH_A.pdb	12 A	1.562
1eisFH_A.pdb	17 A	1.558
1eisFH_A.pdb	18 A	1.538
1eisFH_A.pdb	24 A	1.574
1eisFH_A.pdb	31 A	1.578
1eisFH_A.pdb	35 A	1.548
1eisFH_A.pdb	39 A	1.579
1eisFH_A.pdb	49 A	1.513
1eisFH_A.pdb	58 A	1.545
1eisFH_A.pdb	63 A	1.547
1eisFH_A.pdb	64 A	1.511
1eisFH_A.pdb	70 A	1.546
1eisFH_A.pdb	77 A	1.568
1eisFH_A.pdb	82 A	1.564
1eisFH_A.pdb	86 A	1.557
1h7eFH_B.pdb	126 B	1.536
1h7eFH_B.pdb	229 B	1.536
1ne7FH_C.pdb	48 C	1.529
1ne7FH_C.pdb	118 C	1.526
1ne7FH_C.pdb	239 C	1.533
2pu9FH_A.pdb	30 A	1.533
2pu9FH_A.pdb	55 A	1.526
2pu9FH_A.pdb	57 A	1.527
2pu9FH_A.pdb	74 A	1.532
2pu9FH_A.pdb	76 A	1.531
2pu9FH_A.pdb	85 A	1.536
2pu9FH_A.pdb	87 A	1.534
3fhlFH_C.pdb	295 C	1.535
3fhlFH_C.pdb	317 C	1.522
1uptFH_E.pdb	80 E	1.536
1uptFH_E.pdb	95 E	1.53
3f0iFH_A.pdb	11 A	1.525
3f0iFH_A.pdb	61 A	1.524
3f0iFH_A.pdb	99 A	1.499
2vyoFH_A.pdb	22 A	1.529
2vyoFH_A.pdb	97 A	1.527
2vyoFH_A.pdb	130 A	1.508
2vyoFH_A.pdb	155 A	1.526
2vyoFH_A.pdb	215 A	1.524
2jekFH_A.pdb	81 A	1.526
2jekFH_A.pdb	106 A	1.525
3fkrFH_B.pdb	58 B	1.545
3fkrFH_B.pdb	103 B	1.536
3nrfFH_A.pdb	69 A	1.544
3nrfFH_A.pdb	125 A	1.524
3acxFH_A.pdb	11 A	1.524
3acxFH_A.pdb	44 A	1.531
3acxFH_A.pdb	130 A	1.529
3c5nFH_A.pdb	254 A	1.522
3c5nFH_A.pdb	470 A	1.539
1uasFH_A.pdb	21 A	1.535
1uasFH_A.pdb	53 A	1.529
1uasFH_A.pdb	101 A	1.524
1uasFH_A.pdb	132 A	1.537
1uasFH_A.pdb	162 A	1.534
1uasFH_A.pdb	248 A	1.534
1uasFH_A.pdb	354 A	1.535
1eq9FH_B.pdb	342 B	1.515
1eq9FH_B.pdb	358 B	1.524
1eq9FH_B.pdb	436 B	1.534
1eq9FH_B.pdb	468 B	1.526
1eq9FH_B.pdb	482 B	1.527
1eq9FH_B.pdb	491 B	1.531
1eq9FH_B.pdb	520 B	1.515
3erxFH_B.pdb	78 B	1.509
1zgkFH_A.pdb	368 A	1.521
1zgkFH_A.pdb	395 A	1.513
1zgkFH_A.pdb	406 A	1.52
1zgkFH_A.pdb	434 A	1.539
1zgkFH_A.pdb	489 A	1.541
1zgkFH_A.pdb	513 A	1.539
1zgkFH_A.pdb	518 A	1.527
1zgkFH_A.pdb	583 A	1.525
3lg3FH_A.pdb	44 A	1.528
3lg3FH_A.pdb	69 A	1.531
3lg3FH_A.pdb	196 A	1.529
3lg3FH_A.pdb	246 A	1.53
3lg3FH_A.pdb	289 A	1.528
3lg3FH_A.pdb	319 A	1.528
3p73FH_A.pdb	98 A	1.528
3p73FH_A.pdb	161 A	1.508
3p73FH_A.pdb	199 A	1.526
3p73FH_A.pdb	255 A	1.523
1dpjFH_A.pdb	45 A	1.521
1dpjFH_A.pdb	50 A	1.509
1dpjFH_A.pdb	249 A	1.525
1dpjFH_A.pdb	282 A	1.548
1xkpFH_C.pdb	88 C	1.531
2e6uFH_X.pdb	67 X	1.519
2e6uFH_X.pdb	132 X	1.524
3q3jFH_A.pdb	1504 A	1.529
3q3jFH_A.pdb	1522 A	1.535
1qwyFH_A.pdb	94 A	1.548
2v4nFH_A.pdb	71 A	1.536
2v4nFH_A.pdb	139 A	1.528
2v4nFH_A.pdb	176 A	1.53
1ta3FH_A.pdb	25 A	1.528
1ta3FH_A.pdb	66 A	1.529
1ta3FH_A.pdb	164 A	1.533
1ta3FH_A.pdb	195 A	1.52
3hxtFH_A.pdb	78 A	1.52
3hxtFH_A.pdb	160 A	1.538
3hxtFH_A.pdb	180 A	1.529
2c0dFH_B.pdb	54 B	1.521
2c0dFH_B.pdb	55 B	1.533
2c0dFH_B.pdb	67 B	1.522
2c0dFH_B.pdb	152 B	1.522
2c0dFH_B.pdb	187 B	1.52
3d0kFH_A.pdb	136 A	1.534
3d0kFH_A.pdb	277 A	1.539
3dhfFH_B.pdb	39 B	1.53
3dhfFH_B.pdb	141 B	1.536
3dhfFH_B.pdb	287 B	1.54
3dhfFH_B.pdb	397 B	1.515
3dhfFH_B.pdb	401 B	1.52
1ix1FH_B.pdb	92 B	1.535
1ix1FH_B.pdb	131 B	1.534
1ix1FH_B.pdb	136 B	1.537
3lgbFH_B.pdb	336 B	1.522
3lgbFH_B.pdb	417 B	1.516
3lgbFH_B.pdb	434 B	1.521
3lgbFH_B.pdb	465 B	1.52
3lgbFH_B.pdb	474 B	1.516
2xqoFH_A.pdb	77 A	1.577
2z14FH_A.pdb	107 A	1.538
2bemFH_A.pdb	41 A	1.513
2bemFH_A.pdb	49 A	1.506
2bemFH_A.pdb	145 A	1.519
2bemFH_A.pdb	162 A	1.506
2xstFH_A.pdb	46 A	1.53
1gntFH_A.pdb	3 A	1.524
1gntFH_A.pdb	6 A	1.535
1gntFH_A.pdb	15 A	1.522
1gntFH_A.pdb	21 A	1.531
1gntFH_A.pdb	312 A	1.531
1gntFH_A.pdb	361 A	1.543
1gntFH_A.pdb	406 A	1.556
1gntFH_A.pdb	434 A	1.536
1gntFH_A.pdb	459 A	1.501
2op3FH_A.pdb	12 A	1.517
2op3FH_A.pdb	22 A	1.529
2op3FH_A.pdb	25 A	1.526
2op3FH_A.pdb	56 A	1.513
2op3FH_A.pdb	66 A	1.532
2op3FH_A.pdb	99 A	1.524
2op3FH_A.pdb	110 A	1.526
2op3FH_A.pdb	158 A	1.518
2op3FH_A.pdb	206 A	1.523
2gjdFH_C.pdb	5 C	1.523
2gjdFH_C.pdb	93 C	1.511
1vr7FH_B.pdb	15 B	1.508
1vr7FH_B.pdb	83 B	1.555
2ciuFH_A.pdb	128 A	1.524
3ljuFH_X.pdb	21 X	1.557
3ljuFH_X.pdb	24 X	1.541
3ljuFH_X.pdb	41 X	1.542
3ljuFH_X.pdb	44 X	1.561
3ljuFH_X.pdb	101 X	1.538
3ljuFH_X.pdb	338 X	1.523
3ga3FH_A.pdb	907 A	1.527
3ga3FH_A.pdb	910 A	1.537
3ga3FH_A.pdb	915 A	1.543
3ga3FH_A.pdb	951 A	1.522
3ga3FH_A.pdb	962 A	1.529
3ga3FH_A.pdb	964 A	1.545
3ga3FH_A.pdb	981 A	1.525
1i2mFH_B.pdb	81 B	1.526
1i2mFH_B.pdb	93 B	1.525
1i2mFH_B.pdb	198 B	1.53
1i2mFH_B.pdb	228 B	1.533
1i2mFH_B.pdb	247 B	1.528
1i2mFH_B.pdb	280 B	1.527
1i2mFH_B.pdb	308 B	1.535
1i2mFH_B.pdb	352 B	1.532
3l8aFH_B.pdb	167 B	1.523
3l8aFH_B.pdb	189 B	1.526
1v54FH_A.pdb	498 A	1.53
1yxyFH_A.pdb	22 A	1.53
1yxyFH_A.pdb	109 A	1.53
1yxyFH_A.pdb	183 A	1.526
1mv8FH_C.pdb	15 C	1.527
1mv8FH_C.pdb	18 C	1.533
1mv8FH_C.pdb	83 C	1.529
1mv8FH_C.pdb	103 C	1.519
1mv8FH_C.pdb	141 C	1.529
1mv8FH_C.pdb	213 C	1.532
1mv8FH_C.pdb	246 C	1.527
1mv8FH_C.pdb	268 C	1.532
1mv8FH_C.pdb	435 C	1.536
1r12FH_A.pdb	15 A	1.519
1r12FH_A.pdb	34 A	1.524
1r12FH_A.pdb	51 A	1.518
1r12FH_A.pdb	112 A	1.551
1r12FH_A.pdb	125 A	1.524
1r12FH_A.pdb	131 A	1.512
1r12FH_A.pdb	206 A	1.522
1r12FH_A.pdb	227 A	1.525
1r12FH_A.pdb	239 A	1.537
1r12FH_A.pdb	248 A	1.539
2h26FH_A.pdb	102 A	1.549
2h26FH_A.pdb	131 A	1.526
2h26FH_A.pdb	145 A	1.526
2h26FH_A.pdb	166 A	1.526
2h26FH_A.pdb	206 A	1.524
2h26FH_A.pdb	261 A	1.545
1wtaFH_A.pdb	143 A	1.516
1wtaFH_A.pdb	169 A	1.527
1wtaFH_A.pdb	205 A	1.495
1wtaFH_A.pdb	210 A	1.534
1wtaFH_A.pdb	264 A	1.53
1wtaFH_A.pdb	266 A	1.548
1wtaFH_A.pdb	267 A	1.534
1iuqFH_A.pdb	20 A	1.555
1iuqFH_A.pdb	177 A	1.542
1iuqFH_A.pdb	188 A	1.539
1iuqFH_A.pdb	278 A	1.559
1jnrFH_D.pdb	10 D	1.529
1jnrFH_D.pdb	13 D	1.535
1jnrFH_D.pdb	21 D	1.533
1jnrFH_D.pdb	25 D	1.528
1jnrFH_D.pdb	47 D	1.532
1jnrFH_D.pdb	50 D	1.535
1jnrFH_D.pdb	53 D	1.532
1jnrFH_D.pdb	57 D	1.525
1jnrFH_D.pdb	77 D	1.529
2ox4FH_H.pdb	292 H	1.535
2ox4FH_H.pdb	337 H	1.546
2ox4FH_H.pdb	354 H	1.52
2h30FH_A.pdb	68 A	1.521
2h30FH_A.pdb	71 A	1.521
1ia6FH_A.pdb	22 A	1.53
1ia6FH_A.pdb	38 A	1.536
1ia6FH_A.pdb	180 A	1.528
1ia6FH_A.pdb	255 A	1.535
1ia6FH_A.pdb	321 A	1.531
1ia6FH_A.pdb	359 A	1.533
3ff7FH_C.pdb	75 C	1.529
3ff7FH_C.pdb	86 C	1.52
3ff7FH_C.pdb	103 C	1.525
3ff7FH_C.pdb	163 C	1.549
3ff7FH_C.pdb	176 C	1.528
3ff7FH_C.pdb	184 C	1.528
3ek2FH_A.pdb	28 A	1.535
3ek2FH_A.pdb	63 A	1.525
3oecFH_C.pdb	57 C	1.542
3oecFH_C.pdb	152 C	1.528
3bemFH_A.pdb	154 A	1.499
3qd5FH_B.pdb	15 B	1.542
3qd5FH_B.pdb	116 B	1.539
1l3pFH_A.pdb	205 A	1.527
3coxFH_A.pdb	57 A	1.538
2w1rFH_A.pdb	77 A	1.53
1z47FH_A.pdb	315 A	1.528
1k3sFH_A.pdb	43 A	1.529
1k3sFH_A.pdb	44 A	1.528
3hs3FH_A.pdb	268 A	1.532
3o2tFH_A.pdb	100 A	1.529
3o2tFH_A.pdb	157 A	1.529
1iwdFH_A.pdb	22 A	1.533
1iwdFH_A.pdb	25 A	1.538
1iwdFH_A.pdb	56 A	1.522
1iwdFH_A.pdb	63 A	1.536
1iwdFH_A.pdb	96 A	1.535
1iwdFH_A.pdb	152 A	1.533
1iwdFH_A.pdb	203 A	1.536
2wfoFH_A.pdb	92 A	1.53
2wfoFH_A.pdb	135 A	1.533
2wfoFH_A.pdb	164 A	1.521
2wfoFH_A.pdb	207 A	1.533
2wfoFH_A.pdb	213 A	1.537
2wfoFH_A.pdb	220 A	1.533
2wfoFH_A.pdb	229 A	1.517
2wfoFH_A.pdb	237 A	1.529
1z6nFH_A.pdb	66 A	1.526
1z6nFH_A.pdb	69 A	1.525
2pqxFH_A.pdb	25 A	1.528
2pqxFH_A.pdb	39 A	1.527
2pqxFH_A.pdb	80 A	1.53
2pqxFH_A.pdb	97 A	1.534
2pqxFH_A.pdb	124 A	1.529
2pqxFH_A.pdb	136 A	1.533
2pqxFH_A.pdb	197 A	1.526
2pqxFH_A.pdb	234 A	1.525
3kgrFH_A.pdb	49 A	1.525
3kgrFH_A.pdb	101 A	1.536
2igiFH_A.pdb	104 A	1.533
2a2rFH_B.pdb	14 B	1.529
2a2rFH_B.pdb	47 B	1.528
2a2rFH_B.pdb	101 B	1.529
2a2rFH_B.pdb	169 B	1.537
3m2oFH_A.pdb	23 A	1.528
3pl0FH_B.pdb	24 B	1.541
3pl0FH_B.pdb	71 B	1.518
1z7aFH_D.pdb	42 D	1.545
1z7aFH_D.pdb	124 D	1.538
1z7aFH_D.pdb	260 D	1.545
1zpwFH_X.pdb	39 X	1.548
1vlrFH_A.pdb	221 A	1.492
1vlrFH_A.pdb	306 A	1.522
3iugFH_B.pdb	372 B	1.52
3iugFH_B.pdb	392 B	1.5
3iugFH_B.pdb	446 B	1.516
3iugFH_B.pdb	511 B	1.535
2dxeFH_B.pdb	120 B	1.529
2wvvFH_A.pdb	140 A	1.527
2wvvFH_A.pdb	308 A	1.529
2wvvFH_A.pdb	384 A	1.541
2z6oFH_A.pdb	69 A	1.527
2z6oFH_A.pdb	116 A	1.531
2z6oFH_A.pdb	165 A	1.526
1ynpFH_B.pdb	20 B	1.536
1ynpFH_B.pdb	244 B	1.53
1u11FH_A.pdb	94 A	1.531
2vckFH_D.pdb	101 D	1.53
2vckFH_D.pdb	159 D	1.534
2v89FH_A.pdb	1419 A	1.531
2v89FH_A.pdb	1420 A	1.507
2v89FH_A.pdb	1423 A	1.53
2v89FH_A.pdb	1446 A	1.52
2v89FH_A.pdb	1458 A	1.529
2v89FH_A.pdb	1478 A	1.537
3hj4FH_B.pdb	60 B	1.54
3hj4FH_B.pdb	129 B	1.528
3hj4FH_B.pdb	146 B	1.528
3hj4FH_B.pdb	247 B	1.516
3hj4FH_B.pdb	342 B	1.517
2ff4FH_A.pdb	110 A	1.542
2ff4FH_A.pdb	184 A	1.531
2ff4FH_A.pdb	372 A	1.536
1lb6FH_A.pdb	349 A	1.527
1lb6FH_A.pdb	366 A	1.53
1lb6FH_A.pdb	390 A	1.537
1lb6FH_A.pdb	403 A	1.521
1lb6FH_A.pdb	497 A	1.532
2zblFH_A.pdb	97 A	1.531
2zblFH_A.pdb	154 A	1.531
2zblFH_A.pdb	348 A	1.527
2zblFH_A.pdb	387 A	1.54
1g8iFH_B.pdb	38 B	1.512
1qz9FH_A.pdb	7 A	1.526
1qz9FH_A.pdb	194 A	1.532
1qz9FH_A.pdb	224 A	1.546
1qz9FH_A.pdb	246 A	1.528
1qz9FH_A.pdb	280 A	1.538
1qz9FH_A.pdb	293 A	1.525
1qz9FH_A.pdb	325 A	1.535
3nxqFH_A.pdb	128 A	1.531
3nxqFH_A.pdb	136 A	1.539
3nxqFH_A.pdb	330 A	1.527
3nxqFH_A.pdb	348 A	1.535
3nxqFH_A.pdb	474 A	1.534
3nxqFH_A.pdb	516 A	1.527
3nxqFH_A.pdb	528 A	1.525
1vhcFH_F.pdb	104 F	1.555
1vhcFH_F.pdb	181 F	1.571
3it4FH_C.pdb	90 C	1.536
3it4FH_C.pdb	125 C	1.522
1l5oFH_A.pdb	67 A	1.529
1l5oFH_A.pdb	100 A	1.533
1l5oFH_A.pdb	134 A	1.534
1l5oFH_A.pdb	160 A	1.555
1l5oFH_A.pdb	256 A	1.528
1l5oFH_A.pdb	275 A	1.531
1l5oFH_A.pdb	332 A	1.535
2oizFH_D.pdb	75 D	1.536
2oizFH_D.pdb	81 D	1.543
2oizFH_D.pdb	88 D	1.513
2oizFH_D.pdb	90 D	1.518
2oizFH_D.pdb	91 D	1.55
2oizFH_D.pdb	98 D	1.518
2oizFH_D.pdb	113 D	1.541
2oizFH_D.pdb	129 D	1.527
2oizFH_D.pdb	130 D	1.539
2oizFH_D.pdb	135 D	1.525
2oizFH_D.pdb	138 D	1.537
2oizFH_D.pdb	140 D	1.5
2oizFH_D.pdb	161 D	1.533
2oizFH_D.pdb	171 D	1.535
3ffrFH_A.pdb	80 A	1.524
3ffrFH_A.pdb	88 A	1.538
3ffrFH_A.pdb	134 A	1.516
3ffrFH_A.pdb	191 A	1.522
3glrFH_A.pdb	137 A	1.532
3glrFH_A.pdb	256 A	1.526
3glrFH_A.pdb	259 A	1.534
3glrFH_A.pdb	280 A	1.52
3glrFH_A.pdb	283 A	1.525
2v7sFH_A.pdb	108 A	1.53
2v7sFH_A.pdb	191 A	1.563
2ccqFH_A.pdb	21 A	1.53
2ccqFH_A.pdb	74 A	1.532
3cmcFH_Q.pdb	149 Q	1.564
3cmcFH_Q.pdb	153 Q	1.535
2iumFH_A.pdb	590 A	1.53
2iumFH_A.pdb	616 A	1.531
3on4FH_E.pdb	104 E	1.531
2xlkFH_A.pdb	22 A	1.539
2xlkFH_A.pdb	175 A	1.523
2r16FH_A.pdb	890 A	1.519
2r16FH_A.pdb	898 A	1.544
2we2FH_A.pdb	4 A	1.535
2we2FH_A.pdb	184 A	1.535
2we2FH_A.pdb	212 A	1.538
2we2FH_A.pdb	246 A	1.529
1w8oFH_A.pdb	351 A	1.52
1w8oFH_A.pdb	405 A	1.557
1j2rFH_A.pdb	138 A	1.529
1j2rFH_A.pdb	167 A	1.524
3fkeFH_A.pdb	247 A	1.517
3fkeFH_A.pdb	275 A	1.535
3fkeFH_A.pdb	307 A	1.531
3fkeFH_A.pdb	326 A	1.524
2c0cFH_A.pdb	46 A	1.547
2c0cFH_A.pdb	189 A	1.527
2c0cFH_A.pdb	195 A	1.531
2c0cFH_A.pdb	209 A	1.523
2c0cFH_A.pdb	314 A	1.542
2c0cFH_A.pdb	321 A	1.482
1oa2FH_C.pdb	4 C	1.541
1oa2FH_C.pdb	32 C	1.531
2q8rFH_G.pdb	8 G	1.527
2q8rFH_G.pdb	9 G	1.533
2q8rFH_G.pdb	32 G	1.543
2q8rFH_G.pdb	48 G	1.531
2v0pFH_A.pdb	182 A	1.581
2v0pFH_A.pdb	226 A	1.501
3lxlFH_A.pdb	839 A	1.53
3lxlFH_A.pdb	909 A	1.536
3lxlFH_A.pdb	934 A	1.519
3lxlFH_A.pdb	945 A	1.523
3lxlFH_A.pdb	1024 A	1.529
3lxlFH_A.pdb	1028 A	1.526
3lxlFH_A.pdb	1066 A	1.532
3lxlFH_A.pdb	1077 A	1.537
3g7nFH_B.pdb	25 B	1.529
3g7nFH_B.pdb	220 B	1.529
3g7nFH_B.pdb	228 B	1.531
3g7nFH_B.pdb	254 B	1.533
3gipFH_A.pdb	95 A	1.527
3gipFH_A.pdb	242 A	1.532
3gipFH_A.pdb	251 A	1.528
3gipFH_A.pdb	313 A	1.529
3gipFH_A.pdb	327 A	1.534
3gipFH_A.pdb	359 A	1.527
3gipFH_A.pdb	360 A	1.535
2ftxFH_A.pdb	169 A	1.543
2fcwFH_B.pdb	88 B	1.525
2fcwFH_B.pdb	95 B	1.521
2fcwFH_B.pdb	100 B	1.533
2fcwFH_B.pdb	107 B	1.534
2fcwFH_B.pdb	113 B	1.531
2fcwFH_B.pdb	122 B	1.531
2fcwFH_B.pdb	127 B	1.515
2fcwFH_B.pdb	134 B	1.521
2fcwFH_B.pdb	139 B	1.544
2fcwFH_B.pdb	146 B	1.535
2fcwFH_B.pdb	152 B	1.514
2fcwFH_B.pdb	163 B	1.539
3e8mFH_B.pdb	88 B	1.524
2x4jFH_A.pdb	23 A	1.543
2x4jFH_A.pdb	55 A	1.527
2x4jFH_A.pdb	133 A	1.528
3o3mFH_C.pdb	71 C	1.532
3o3mFH_C.pdb	84 C	1.534
3o3mFH_C.pdb	99 C	1.532
3o3mFH_C.pdb	112 C	1.534
3o3mFH_C.pdb	113 C	1.532
3o3mFH_C.pdb	117 C	1.53
3o3mFH_C.pdb	223 C	1.528
3o3mFH_C.pdb	267 C	1.532
3o3mFH_C.pdb	335 C	1.531
3o3mFH_C.pdb	346 C	1.534
3ipwFH_A.pdb	52 A	1.556
3ipwFH_A.pdb	101 A	1.539
3ipwFH_A.pdb	152 A	1.529
3ipwFH_A.pdb	160 A	1.536
3ipwFH_A.pdb	171 A	1.52
3ipwFH_A.pdb	177 A	1.534
3ipwFH_A.pdb	225 A	1.536
3ipwFH_A.pdb	228 A	1.545
2reeFH_A.pdb	248 A	1.532
2reeFH_A.pdb	300 A	1.531
2reeFH_A.pdb	342 A	1.534
2reeFH_A.pdb	357 A	1.537
2reeFH_A.pdb	413 A	1.519
3fdeFH_B.pdb	517 B	1.55
1z1sFH_A.pdb	23 A	1.529
3c7fFH_A.pdb	241 A	1.54
3l1eFH_A.pdb	131 A	1.523
3hkoFH_A.pdb	86 A	1.526
3hkoFH_A.pdb	92 A	1.525
3hkoFH_A.pdb	112 A	1.525
3hkoFH_A.pdb	122 A	1.528
3hkoFH_A.pdb	124 A	1.538
3hkoFH_A.pdb	127 A	1.532
3hkoFH_A.pdb	172 A	1.539
3hkoFH_A.pdb	239 A	1.539
3hkoFH_A.pdb	276 A	1.53
3q90FH_A.pdb	73 A	1.524
3aarFH_A.pdb	44 A	1.528
3aarFH_A.pdb	244 A	1.535
3aarFH_A.pdb	264 A	1.527
3aarFH_A.pdb	330 A	1.526
3aarFH_A.pdb	351 A	1.542
1w2yFH_A.pdb	42 A	1.529
1w2yFH_A.pdb	47 A	1.511
1w2yFH_A.pdb	115 A	1.52
1w2yFH_A.pdb	140 A	1.517
1w2yFH_A.pdb	161 A	1.517
1w2yFH_A.pdb	225 A	1.539
3qzbFH_A.pdb	115 A	1.527
2ddxFH_A.pdb	159 A	1.535
2ddxFH_A.pdb	189 A	1.535
1zr0FH_D.pdb	5 D	1.488
1zr0FH_D.pdb	14 D	1.524
1zr0FH_D.pdb	30 D	1.52
1zr0FH_D.pdb	38 D	1.561
1zr0FH_D.pdb	51 D	1.54
1zr0FH_D.pdb	55 D	1.573
1nulFH_A.pdb	59 A	1.532
1k4mFH_C.pdb	132 C	1.531
1k4mFH_C.pdb	194 C	1.533
3g3tFH_A.pdb	418 A	1.537
3f7lFH_A.pdb	6 A	1.522
3f7lFH_A.pdb	55 A	1.501
3f7lFH_A.pdb	144 A	1.537
3r1iFH_A.pdb	67 A	1.544
3r1iFH_A.pdb	94 A	1.529
3r1iFH_A.pdb	164 A	1.539
3r1iFH_A.pdb	254 A	1.547
2o6sFH_A.pdb	24 A	1.508
2o6sFH_A.pdb	28 A	1.531
2o6sFH_A.pdb	30 A	1.523
2o6sFH_A.pdb	37 A	1.518
2o6sFH_A.pdb	185 A	1.529
2o6sFH_A.pdb	187 A	1.524
2o6sFH_A.pdb	218 A	1.531
2o6sFH_A.pdb	230 A	1.527
3bf5FH_A.pdb	93 A	1.523
1pl8FH_D.pdb	44 D	1.529
1pl8FH_D.pdb	105 D	1.53
1pl8FH_D.pdb	119 D	1.529
1pl8FH_D.pdb	129 D	1.531
1pl8FH_D.pdb	139 D	1.533
1pl8FH_D.pdb	164 D	1.533
1pl8FH_D.pdb	178 D	1.532
1pl8FH_D.pdb	241 D	1.533
1pl8FH_D.pdb	249 D	1.529
1pl8FH_D.pdb	300 D	1.542
1pl8FH_D.pdb	349 D	1.529
2vvpFH_B.pdb	35 B	1.534
2vvpFH_B.pdb	50 B	1.52
2vvpFH_B.pdb	87 B	1.525
2z6wFH_A.pdb	40 A	1.522
2z6wFH_A.pdb	62 A	1.53
2z6wFH_A.pdb	115 A	1.51
2z6wFH_A.pdb	161 A	1.539
3kwsFH_A.pdb	109 A	1.504
3kwsFH_A.pdb	127 A	1.525
3kwsFH_A.pdb	170 A	1.52
3kwsFH_A.pdb	197 A	1.542
3kwsFH_A.pdb	210 A	1.53
3kwsFH_A.pdb	220 A	1.549
3kwsFH_A.pdb	288 A	1.538
3kwsFH_A.pdb	290 A	1.522
3hdxFH_A.pdb	72 A	1.547
3hdxFH_A.pdb	241 A	1.537
3hdxFH_A.pdb	409 A	1.502
2vzcFH_A.pdb	352 A	1.559
1x0cFH_A.pdb	337 A	1.528
1hh8FH_A.pdb	40 A	1.533
1hh8FH_A.pdb	45 A	1.534
1hh8FH_A.pdb	121 A	1.539
1hh8FH_A.pdb	165 A	1.533
2w3pFH_B.pdb	91 B	1.529
2w3pFH_B.pdb	111 B	1.539
2w3pFH_B.pdb	140 B	1.521
2w3pFH_B.pdb	151 B	1.533
2w3pFH_B.pdb	199 B	1.542
2w3pFH_B.pdb	387 B	1.518
1ci4FH_B.pdb	67 B	1.538
1ci4FH_B.pdb	77 B	1.538
1ci4FH_B.pdb	80 B	1.534
1ci4FH_B.pdb	85 B	1.544
2p0nFH_A.pdb	21 A	1.543
2p0nFH_A.pdb	29 A	1.528
2p0nFH_A.pdb	44 A	1.511
1i8fFH_F.pdb	8 F	1.535
3b2yFH_A.pdb	19 A	1.53
3b2yFH_A.pdb	158 A	1.518
3b2yFH_A.pdb	168 A	1.523
3b2yFH_A.pdb	214 A	1.519
3b2yFH_A.pdb	243 A	1.514
3b2yFH_A.pdb	270 A	1.52
3pfsFH_A.pdb	1084 A	1.523
1jy3FH_P.pdb	8 P	1.547
1jy3FH_P.pdb	9 P	1.535
1jy3FH_P.pdb	19 P	1.538
1jy3FH_P.pdb	23 P	1.532
1ymtFH_A.pdb	248 A	1.559
1ymtFH_A.pdb	267 A	1.531
1ymtFH_A.pdb	284 A	1.527
1ymtFH_A.pdb	371 A	1.545
3c3jFH_F.pdb	133 F	1.533
3c3jFH_F.pdb	140 F	1.544
3c3jFH_F.pdb	183 F	1.529
3c3jFH_F.pdb	204 F	1.539
3c3jFH_F.pdb	341 F	1.517
1luzFH_B.pdb	85 B	1.528
3k89FH_A.pdb	149 A	1.532
3k89FH_A.pdb	262 A	1.544
3k89FH_A.pdb	277 A	1.529
2qsxFH_A.pdb	69 A	1.53
2qsxFH_A.pdb	83 A	1.525
2qsxFH_A.pdb	146 A	1.516
1gyhFH_C.pdb	241 C	1.551
1gyhFH_C.pdb	242 C	1.551
3eggFH_D.pdb	431 D	1.532
2jhnFH_B.pdb	178 B	1.536
1sdsFH_A.pdb	65 A	1.531
2zhnFH_A.pdb	74 A	1.53
2zhnFH_A.pdb	102 A	1.531
2pktFH_A.pdb	45 A	1.533
2pktFH_A.pdb	73 A	1.526
3nr5FH_A.pdb	34 A	1.528
3nr5FH_A.pdb	41 A	1.532
3nr5FH_A.pdb	86 A	1.523
3nr5FH_A.pdb	112 A	1.53
3nr5FH_A.pdb	116 A	1.541
3nr5FH_A.pdb	156 A	1.525
1g97FH_A.pdb	369 A	1.536
2weeFH_B.pdb	81 B	1.529
2weeFH_B.pdb	129 B	1.52
1ijxFH_C.pdb	3 C	1.531
1ijxFH_C.pdb	11 C	1.534
1ijxFH_C.pdb	48 C	1.543
1ijxFH_C.pdb	57 C	1.529
1ijxFH_C.pdb	64 C	1.543
1ijxFH_C.pdb	76 C	1.528
1ijxFH_C.pdb	80 C	1.523
1ijxFH_C.pdb	87 C	1.534
1ijxFH_C.pdb	104 C	1.528
1ijxFH_C.pdb	115 C	1.542
1gu2FH_A.pdb	49 A	1.518
1gu2FH_A.pdb	52 A	1.536
1gu2FH_A.pdb	96 A	1.545
1gu2FH_A.pdb	104 A	1.536
2abwFH_B.pdb	44 B	1.542
2abwFH_B.pdb	60 B	1.52
2abwFH_B.pdb	61 B	1.481
2abwFH_B.pdb	87 B	1.511
2abwFH_B.pdb	90 B	1.539
2abwFH_B.pdb	120 B	1.524
2abwFH_B.pdb	133 B	1.528
2abwFH_B.pdb	152 B	1.479
2abwFH_B.pdb	190 B	1.527
1m6jFH_B.pdb	14 B	1.533
1m6jFH_B.pdb	93 B	1.53
1m6jFH_B.pdb	133 B	1.53
1m6jFH_B.pdb	226 B	1.535
3g08FH_A.pdb	12 A	1.517
3g08FH_A.pdb	104 A	1.54
3g08FH_A.pdb	168 A	1.537
3g08FH_A.pdb	208 A	1.531
3g08FH_A.pdb	263 A	1.53
1swyFH_A.pdb	54 A	1.575
1swyFH_A.pdb	97 A	1.508
1l9xFH_A.pdb	19 A	1.532
1l9xFH_A.pdb	110 A	1.532
1l9xFH_A.pdb	124 A	1.53
1l9xFH_A.pdb	290 A	1.531
2hhjFH_A.pdb	23 A	1.529
2hhjFH_A.pdb	41 A	1.531
2hhjFH_A.pdb	145 A	1.532
2r37FH_A.pdb	101 A	1.521
2r37FH_A.pdb	156 A	1.538
3a0yFH_B.pdb	634 B	1.52
3a0yFH_B.pdb	721 B	1.532
2p65FH_A.pdb	155 A	1.533
1i12FH_C.pdb	39 C	1.531
1i12FH_C.pdb	94 C	1.521
1i12FH_C.pdb	128 C	1.544
1i12FH_C.pdb	135 C	1.531
1i12FH_C.pdb	146 C	1.531
3a04FH_A.pdb	303 A	1.536
3a04FH_A.pdb	327 A	1.527
3a04FH_A.pdb	334 A	1.535
3a04FH_A.pdb	337 A	1.49
1u5dFH_B.pdb	133 B	1.502
1u5dFH_B.pdb	177 B	1.524
2qmmFH_A.pdb	125 A	1.556
2qmmFH_A.pdb	127 A	1.516
2qmmFH_A.pdb	187 A	1.549
2qmmFH_A.pdb	275 A	1.531
2pz0FH_B.pdb	175 B	1.546
2pz0FH_B.pdb	207 B	1.534
1xiyFH_A.pdb	85 A	1.532
1j8rFH_A.pdb	44 A	1.521
1j8rFH_A.pdb	118 A	1.544
2rkyFH_C.pdb	155 C	1.531
2rkyFH_C.pdb	182 C	1.537
2rkyFH_C.pdb	184 C	1.535
2rkyFH_C.pdb	194 C	1.519
2rkyFH_C.pdb	200 C	1.544
2rkyFH_C.pdb	227 C	1.538
2rkyFH_C.pdb	229 C	1.524
2rkyFH_C.pdb	239 C	1.548
3ht1FH_A.pdb	105 A	1.517
3ht1FH_A.pdb	113 A	1.556
2dtjFH_A.pdb	65 A	1.556
2pbiFH_C.pdb	182 C	1.529
2pbiFH_C.pdb	264 C	1.528
2pbiFH_C.pdb	332 C	1.528
3ce6FH_A.pdb	93 A	1.521
3ce6FH_A.pdb	281 A	1.519
3ce6FH_A.pdb	290 A	1.542
1e5pFH_A.pdb	38 A	1.556
1e5pFH_A.pdb	42 A	1.529
1e5pFH_A.pdb	57 A	1.536
1e5pFH_A.pdb	149 A	1.534
2pptFH_B.pdb	14 B	1.539
2pptFH_B.pdb	17 B	1.53
2pptFH_B.pdb	34 B	1.534
2pptFH_B.pdb	37 B	1.53
2pptFH_B.pdb	73 B	1.551
2pptFH_B.pdb	76 B	1.532
2etbFH_A.pdb	120 A	1.537
2etbFH_A.pdb	135 A	1.52
2etbFH_A.pdb	157 A	1.529
2etbFH_A.pdb	179 A	1.526
2etbFH_A.pdb	195 A	1.541
2etbFH_A.pdb	206 A	1.558
2etbFH_A.pdb	219 A	1.543
2etbFH_A.pdb	282 A	1.535
2a14FH_A.pdb	44 A	1.535
2a14FH_A.pdb	75 A	1.537
2a14FH_A.pdb	115 A	1.532
2a14FH_A.pdb	141 A	1.533
2a14FH_A.pdb	159 A	1.532
2a14FH_A.pdb	168 A	1.53
2a14FH_A.pdb	170 A	1.532
2a14FH_A.pdb	171 A	1.534
2a14FH_A.pdb	181 A	1.527
2a14FH_A.pdb	213 A	1.523
2a14FH_A.pdb	253 A	1.539
2a14FH_A.pdb	254 A	1.538
1yp1FH_A.pdb	117 A	1.532
1yp1FH_A.pdb	158 A	1.54
1yp1FH_A.pdb	160 A	1.53
1yp1FH_A.pdb	163 A	1.547
1yp1FH_A.pdb	180 A	1.515
1yp1FH_A.pdb	196 A	1.54
2buwFH_B.pdb	426 B	1.506
2buwFH_B.pdb	489 B	1.525
2buwFH_B.pdb	520 B	1.536
2q0sFH_G.pdb	7 G	1.539
2q0sFH_G.pdb	77 G	1.527
1y9wFH_B.pdb	97 B	1.528
2q24FH_A.pdb	74 A	1.564
2f9wFH_B.pdb	7 B	1.527
2f9wFH_B.pdb	50 B	1.535
2f9wFH_B.pdb	117 B	1.534
2f9wFH_B.pdb	143 B	1.535
2f9wFH_B.pdb	188 B	1.533
2f9wFH_B.pdb	204 B	1.528
2f9wFH_B.pdb	211 B	1.531
2f9wFH_B.pdb	245 B	1.532
3p9pFH_A.pdb	438 A	1.515
3p9pFH_A.pdb	669 A	1.534
2r4iFH_D.pdb	10 D	1.516
2r4iFH_D.pdb	118 D	1.559
3cnhFH_A.pdb	183 A	1.527
2w56FH_B.pdb	65 B	1.531
3hqxFH_A.pdb	23 A	1.514
3hqxFH_A.pdb	65 A	1.554
3hqxFH_A.pdb	104 A	1.518
1z9tFH_A.pdb	18 A	1.535
1z9tFH_A.pdb	40 A	1.541
1z9tFH_A.pdb	100 A	1.515
1z9tFH_A.pdb	107 A	1.506
1z9tFH_A.pdb	113 A	1.509
1z9tFH_A.pdb	131 A	1.515
1z9tFH_A.pdb	141 A	1.508
1z9tFH_A.pdb	216 A	1.529
2osoFH_A.pdb	126 A	1.524
2osoFH_A.pdb	142 A	1.525
2osoFH_A.pdb	150 A	1.511
3pcvFH_A.pdb	56 A	1.517
3pcvFH_A.pdb	82 A	1.521
3lblFH_A.pdb	77 A	1.533
1tzyFH_C.pdb	110 C	1.492
2xioFH_A.pdb	76 A	1.528
2xioFH_A.pdb	81 A	1.527
2xioFH_A.pdb	113 A	1.532
2xioFH_A.pdb	123 A	1.519
2xioFH_A.pdb	150 A	1.526
2xioFH_A.pdb	168 A	1.528
2xioFH_A.pdb	198 A	1.53
2xioFH_A.pdb	226 A	1.531
2xioFH_A.pdb	253 A	1.521
2xioFH_A.pdb	261 A	1.529
3cgiFH_C.pdb	61 C	1.525
3cgiFH_C.pdb	111 C	1.51
3dgbFH_A.pdb	43 A	1.529
3dgbFH_A.pdb	214 A	1.531
3dgbFH_A.pdb	256 A	1.537
2zkmFH_X.pdb	188 X	1.526
2zkmFH_X.pdb	216 X	1.534
2zkmFH_X.pdb	296 X	1.529
2zkmFH_X.pdb	353 X	1.52
2zkmFH_X.pdb	355 X	1.53
2zkmFH_X.pdb	360 X	1.529
2zkmFH_X.pdb	424 X	1.526
2zkmFH_X.pdb	621 X	1.529
2zkmFH_X.pdb	777 X	1.523
3kdeFH_C.pdb	4 C	1.529
3kdeFH_C.pdb	7 C	1.535
3kdeFH_C.pdb	8 C	1.518
3kdeFH_C.pdb	22 C	1.52
3kdeFH_C.pdb	35 C	1.534
3kdeFH_C.pdb	44 C	1.555
1wogFH_E.pdb	111 E	1.536
1wogFH_E.pdb	167 E	1.531
1wogFH_E.pdb	298 E	1.53
1t4bFH_B.pdb	72 B	1.532
1t4bFH_B.pdb	135 B	1.527
1t4bFH_B.pdb	265 B	1.53
1t4bFH_B.pdb	273 B	1.527
1khiFH_A.pdb	37 A	1.531
1khiFH_A.pdb	53 A	1.531
3ejkFH_A.pdb	83 A	1.527
3ejkFH_A.pdb	138 A	1.526
3l55FH_B.pdb	35 B	1.532
3l55FH_B.pdb	256 B	1.526
1r5lFH_A.pdb	80 A	1.558
1r5lFH_A.pdb	256 A	1.557
2qc5FH_A.pdb	61 A	1.548
2qc5FH_A.pdb	286 A	1.542
3g7uFH_A.pdb	79 A	1.53
3g7uFH_A.pdb	253 A	1.535
3g7uFH_A.pdb	289 A	1.534
2fmaFH_A.pdb	133 A	1.532
2fmaFH_A.pdb	144 A	1.523
2fmaFH_A.pdb	158 A	1.539
2fmaFH_A.pdb	174 A	1.567
2fmaFH_A.pdb	186 A	1.515
2fmaFH_A.pdb	187 A	1.502
1t0hFH_A.pdb	113 A	1.526
3fbgFH_A.pdb	221 A	1.549
3i83FH_B.pdb	25 B	1.529
3i83FH_B.pdb	72 B	1.524
3i83FH_B.pdb	76 B	1.534
3i83FH_B.pdb	187 B	1.514
2yzhFH_C.pdb	61 C	1.525
2yzhFH_C.pdb	95 C	1.532
3lypFH_B.pdb	11 B	1.513
3lypFH_B.pdb	109 B	1.53
3lypFH_B.pdb	159 B	1.519
3lypFH_B.pdb	160 B	1.53
3mgdFH_A.pdb	122 A	1.533
3bb0FH_A.pdb	342 A	1.525
3ewhFH_A.pdb	862 A	1.531
3ewhFH_A.pdb	905 A	1.528
3ewhFH_A.pdb	919 A	1.528
3ewhFH_A.pdb	1007 A	1.53
3ewhFH_A.pdb	1024 A	1.526
3ewhFH_A.pdb	1045 A	1.529
3ewhFH_A.pdb	1116 A	1.531
3ewhFH_A.pdb	1142 A	1.531
2qtqFH_A.pdb	100 A	1.519
2qtqFH_A.pdb	183 A	1.52
3b9tFH_A.pdb	352 A	1.52
3b9tFH_A.pdb	358 A	1.507
3a7lFH_A.pdb	57 A	1.521
3kgzFH_B.pdb	60 B	1.516
3kgzFH_B.pdb	93 B	1.531
3kgzFH_B.pdb	125 B	1.528
3kgzFH_B.pdb	130 B	1.513
3mnoFH_A.pdb	628 A	1.555
3mnoFH_A.pdb	644 A	1.536
3mnoFH_A.pdb	649 A	1.527
3mnoFH_A.pdb	671 A	1.519
3mnoFH_A.pdb	742 A	1.539
2qndFH_A.pdb	45 A	1.527
3cx2FH_A.pdb	239 A	1.52
3cx2FH_A.pdb	249 A	1.512
3aluFH_A.pdb	1 A	1.547
3aluFH_A.pdb	5 A	1.531
3aluFH_A.pdb	16 A	1.533
3aluFH_A.pdb	33 A	1.546
3aluFH_A.pdb	41 A	1.519
3aluFH_A.pdb	147 A	1.547
3aluFH_A.pdb	151 A	1.537
1z0sFH_C.pdb	62 C	1.527
1z0sFH_C.pdb	105 C	1.514
1z0sFH_C.pdb	144 C	1.528
1z0sFH_C.pdb	173 C	1.525
1hz4FH_A.pdb	63 A	1.534
1hz4FH_A.pdb	174 A	1.531
1hz4FH_A.pdb	181 A	1.533
2pxxFH_A.pdb	67 A	1.515
2pxxFH_A.pdb	100 A	1.537
2furFH_B.pdb	34 B	1.521
2p67FH_A.pdb	51 A	1.531
2p67FH_A.pdb	142 A	1.523
2p67FH_A.pdb	170 A	1.538
2p67FH_A.pdb	238 A	1.538
3balFH_B.pdb	4 B	1.536
3balFH_B.pdb	53 B	1.525
3bcwFH_A.pdb	71 A	1.517
2vn6FH_A.pdb	46 A	1.541
1z76FH_B.pdb	27 B	1.566
1z76FH_B.pdb	29 B	1.553
1z76FH_B.pdb	44 B	1.559
1z76FH_B.pdb	45 B	1.571
1z76FH_B.pdb	50 B	1.586
1z76FH_B.pdb	51 B	1.567
1z76FH_B.pdb	61 B	1.553
1z76FH_B.pdb	84 B	1.554
1z76FH_B.pdb	91 B	1.551
1z76FH_B.pdb	96 B	1.576
1z76FH_B.pdb	98 B	1.56
1z76FH_B.pdb	105 B	1.558
1z76FH_B.pdb	126 B	1.559
1z76FH_B.pdb	133 B	1.559
1md6FH_A.pdb	7 A	1.526
1md6FH_A.pdb	66 A	1.529
1md6FH_A.pdb	69 A	1.532
1md6FH_A.pdb	121 A	1.53
1md6FH_A.pdb	153 A	1.54
2ywjFH_A.pdb	75 A	1.531
2ywjFH_A.pdb	183 A	1.533
3hzpFH_A.pdb	79 A	1.535
1zx6FH_A.pdb	42 A	1.535
1xv5FH_A.pdb	1004 A	1.53
1xv5FH_A.pdb	1075 A	1.532
1xv5FH_A.pdb	1315 A	1.536
1xv5FH_A.pdb	1390 A	1.528
1qjwFH_B.pdb	176 B	1.537
1qjwFH_B.pdb	235 B	1.532
1qjwFH_B.pdb	245 B	1.529
1qjwFH_B.pdb	368 B	1.533
1qjwFH_B.pdb	400 B	1.53
1qjwFH_B.pdb	415 B	1.529
3is6FH_A.pdb	56 A	1.516
3is6FH_A.pdb	151 A	1.511
1e7wFH_A.pdb	34 A	1.524
1e7wFH_A.pdb	89 A	1.527
1e7wFH_A.pdb	96 A	1.557
1e7wFH_A.pdb	103 A	1.531
1e7wFH_A.pdb	265 A	1.558
1e7wFH_A.pdb	276 A	1.535
3huuFH_B.pdb	51 B	1.533
3huuFH_B.pdb	168 B	1.534
3huuFH_B.pdb	177 B	1.527
3boeFH_A.pdb	263 A	1.531
3boeFH_A.pdb	325 A	1.539
2hhgFH_A.pdb	62 A	1.534
2hhgFH_A.pdb	92 A	1.535
2id3FH_B.pdb	119 B	1.568
2id3FH_B.pdb	141 B	1.549
2cvzFH_D.pdb	62 D	1.531
2d6mFH_A.pdb	73 A	1.532
2d6mFH_A.pdb	101 A	1.529
2d6mFH_A.pdb	138 A	1.526
3fbuFH_B.pdb	124 B	1.518
[truncated: 21,583 more rows]
[truncated: 2 more columns]
