# Supplementary material for: In Silico Analysis of Glucose Oxidase from Aspergillus niger: Potential Cysteine Mutation Sites for Enhancing Protein Stability
Source: Bioengineering (Basel). 2021 Nov 19;8(11):188. doi: 10.3390/bioengineering8110188 (PMC8615187; doi:10.3390/bioengineering8110188)
Supplement: Supplementary file 1 [file bioengineering-08-00188-s001.zip › Supplementary File S2.xlsx]

## Sheet: Conservation Score (3QVP)
# 3qvp.pdb.A.mul_align -- js_divergence - window_size: 3 - window lambda: 0.50 - background: blosum62 - seq. weighting: True - gap penalty: 1 - normalized: False
# reference sequence: QUERY
# align_column_number	amino acid	score
3	G	0.184915			score = 0 (unconserved)
4	I	0.138367			score = 0.5
5	E	0.191943			score = 1 (perfectly conserved)
6	A	0.203184
7	S	0.187984
8	L	0.259246
9	L	0.253598
10	T	0.21122
11	D	0.270498
12	P	0.247259
13	K	0.217181
14	D	0.225676
15	V	0.22487
16	S	0.230207
17	G	0.284503
18	R	0.360966
19	T	0.3913
20	V	0.55475
21	D	0.667318
22	Y	0.666326
23	I	0.656089
24	I	0.663293
25	A	0.64588
26	G	0.713955
27	G	0.641606
28	G	0.726424
29	L	0.6391
30	T	0.660811
31	G	0.668462
32	L	0.596414
33	T	0.58635
34	T	0.584358
35	A	0.681482
36	A	0.524559
37	R	0.717525
38	L	0.689906
39	T	0.610281
40	E	0.621487
41	N	0.50117
42	P	0.434616
43	N	0.410789
44	I	0.376377
45	S	0.487954
46	V	0.616813
47	L	0.542763
48	V	0.633535
49	I	0.651194
50	E	0.712749
51	S	0.583381
52	G	0.644718
53	S	0.479419
54	Y	0.397609
55	E	0.379473
56	S	0.263947
57	D	0.213438
58	R	0.239838
59	G	0.316728
60	P	0.347151
61	I	0.332562
62	I	0.462927
63	E	0.398733
64	D	0.463313
65	L	0.570606
66	N	0.391382
67	A	0.430022
68	Y	0.399215
69	G	0.278892
70	D	0.223973
71	I	0.273332
72	F	0.285687
73	G	0.249995
74	S	0.287521
75	S	0.288867
76	V	0.433103
77	D	0.526683
78	H	0.671575
79	A	0.532188
80	Y	0.575948
81	E	0.442314
82	T	0.564491
83	V	0.447566
84	E	0.553416
85	L	0.427802
86	A	0.430142
87	T	0.494115
88	N	0.47939
89	N	0.473555
90	Q	0.574683
91	T	0.43778
92	A	0.425882
93	L	0.392192
94	I	0.515159
95	R	0.469021
96	S	0.562434
97	G	0.632672
98	N	0.650109
99	G	0.565952
100	L	0.677001
101	G	0.729555
102	G	0.705054
103	S	0.664966
104	T	0.704485
105	L	0.537022
106	V	0.559307
107	N	0.641626
108	G	0.539621
109	G	0.571612
110	T	0.479801
111	W	0.659142
112	T	0.491513
113	R	0.663178
114	P	0.609482
115	H	0.49565
116	K	0.53396
117	A	0.42765
118	Q	0.534869
119	V	0.547277
120	D	0.553943
121	S	0.404182
122	W	0.645299
123	E	0.425648
124	T	0.375396
125	V	0.347058
126	F	0.310982
127	G	0.520576
128	N	0.355625
129	E	0.419761
130	G	0.435534
131	W	0.594357
132	N	0.420167
133	W	0.575129
134	D	0.460691
135	N	0.446179
136	V	0.50713
137	A	0.542903
138	A	0.571179
139	Y	0.568969
140	S	0.595967
141	L	0.524185
142	Q	0.579916
143	A	0.465646
144	E	0.523762
145	R	0.391938
146	A	0.337366
147	R	0.329021
148	A	0.261434
149	P	0.290768
150	N	0.286852
151	A	0.199969
152	K	0.207988
153	Q	0.189993
154	I	0.198507
155	A	0.30806
156	A	0.289149
157	G	0.30095
158	H	0.174546
159	Y	0.19981
160	F	0.227068
161	N	0.338453
162	A	0.315722
163	S	0.376229
164	C	0.423941
165	H	0.471856
166	G	0.518471
167	V	0.407304
168	N	0.444341
169	G	0.57947
170	T	0.480973
171	V	0.503105
172	H	0.46309
173	A	0.447719
174	G	0.380344
175	P	0.351584
176	R	0.256292
177	D	0.368424
178	T	0.217391
179	G	0.22824
180	D	0.250969
181	D	0.197784
182	Y	0.285791
183	S	0.32537
184	P	0.405734
185	I	0.403329
186	V	0.34821
187	K	0.327772
188	A	0.395974
189	L	0.425452
190	M	0.331148
191	S	0.35886
192	A	0.448902
193	V	0.31882
194	E	0.302402
195	D	0.335504
196	R	0.315467
197	G	0.441387
198	V	0.392372
199	P	0.300931
200	T	0.328727
201	K	0.37914
202	K	0.341871
203	D	0.510102
204	F	0.484604
205	G	0.512685
206	C	0.4976
207	G	0.457533
208	D	0.398417
209	P	0.414873
210	H	0.353206
211	G	0.45615
212	V	0.352876
213	S	0.391799
214	M	0.369377
215	F	0.411306
216	P	0.397568
217	N	0.398703
218	T	0.460409
219	L	0.350315
220	H	0.334308
221	E	0.232207
222	D	0.378637
223	Q	0.443338
224	V	0.425569
225	R	0.6665
226	S	0.506682
227	D	0.560749
228	A	0.558917
229	A	0.516984
230	R	0.550397
231	E	0.511952
232	W	0.626357
233	L	0.58148
234	L	0.376477
235	P	0.439899
236	N	0.356308
237	Y	0.346215
238	Q	0.34988
239	R	0.525934
240	P	0.477404
241	N	0.653847
242	L	0.574868
243	Q	0.473036
244	V	0.525868
245	L	0.422171
246	T	0.426804
247	G	0.45871
248	Q	0.47053
249	Y	0.419596
250	V	0.540387
251	G	0.411843
252	K	0.559421
253	V	0.569867
254	L	0.437488
255	L	0.475191
256	S	0.440639
257	Q	0.348273
258	N	0.235422
259	G	0.217249
260	T	0.251875
261	T	0.236452
262	P	0.34372
263	R	0.470911
264	A	0.537835
265	V	0.470782
266	G	0.571477
267	V	0.557837
268	E	0.422447
269	F	0.465023
270	G	0.278833
271	T	0.262361
272	H	0.284288
273	K	0.188646
274	G	0.283235
275	N	0.193135
276	T	0.25251
277	H	0.25976
278	N	0.269186
279	V	0.344496
280	Y	0.331659
281	A	0.581842
282	K	0.554168
283	H	0.582784
284	E	0.706093
285	V	0.640881
286	L	0.626893
287	L	0.622883
288	A	0.647112
289	A	0.594721
290	G	0.639699
291	S	0.572937
292	A	0.551015
293	V	0.506497
294	S	0.657955
295	P	0.712192
296	T	0.639243
297	I	0.637991
298	L	0.71007
299	E	0.658734
300	Y	0.588785
301	S	0.763233
302	G	0.718924
303	I	0.66419
304	G	0.695769
305	M	0.515747
306	K	0.487394
307	S	0.475814
308	I	0.401237
309	L	0.581055
310	E	0.448098
311	P	0.450279
312	L	0.492308
313	G	0.545336
314	I	0.607097
315	D	0.531145
316	T	0.499364
317	V	0.514314
318	V	0.422625
319	D	0.499538
320	L	0.514182
321	P	0.591308
322	V	0.665719
323	G	0.704778
324	L	0.549576
325	N	0.739838
326	L	0.685366
327	Q	0.675015
328	D	0.70142
329	Q	0.62078
330	T	0.39066
331	T	0.326167
332	A	0.299886
333	T	0.320149
334	V	0.341566
335	R	0.325005
336	S	0.39385
337	R	0.26896
338	I	0.361452
339	T	0.366709
340	S	0.287892
341	A	0.356864
342	G	0.328891
343	A	0.305129
344	G	0.23774
345	Q	0.278068
346	G	0.288596
347	Q	0.239641
348	A	0.28631
349	A	0.1902
350	W	0.277576
351	F	0.269578
352	A	0.183987
353	T	0.246312
354	F	0.166684
355	N	0.153104
356	E	0.234818
357	T	0.239298
358	F	0.25463
359	G	0.303256
360	D	0.252619
361	Y	0.178493
362	S	0.236133
363	E	0.113975
364	K	0.097828
365	A	0.141409
366	H	0.137717
367	E	0.174407
368	L	0.400922
369	L	0.287363
370	N	0.318167
371	T	0.319505
372	K	0.357588
373	L	0.319786
374	E	0.485834
375	Q	0.281623
376	W	0.369916
377	A	0.429246
378	E	0.361848
379	E	0.358349
380	A	0.303529
381	V	0.343825
382	A	0.34477
383	R	0.321842
384	G	0.390657
385	G	0.403018
386	F	0.5657
387	H	0.465225
388	N	0.494337
389	T	0.42467
390	T	0.324046
391	A	0.382332
392	L	0.224811
393	L	0.242023
394	I	0.156166
395	Q	0.214804
396	Y	0.291259
397	E	0.490743
398	N	0.449179
399	Y	0.486133
400	R	0.49755
401	D	0.443551
402	W	0.37013
403	I	0.346912
404	V	0.321364
405	N	0.368037
406	H	0.273414
407	N	0.30092
408	V	0.280856
409	A	0.27205
410	Y	0.353023
411	S	0.310016
412	E	0.33816
413	L	0.267069
414	F	0.239437
415	L	0.217982
416	D	0.191446
417	T	0.185296
418	A	0.227202
419	G	0.309742
420	V	0.296421
421	A	0.260476
422	S	0.176965
423	F	0.234136
424	D	0.287103
425	V	0.345808
426	W	0.296489
427	D	0.316298
428	L	0.40223
429	L	0.402806
430	P	0.583485
431	F	0.48936
432	T	0.661011
433	R	0.62115
434	G	0.655606
435	Y	0.542758
436	V	0.591482
437	H	0.454664
438	I	0.503603
439	L	0.467737
440	D	0.551817
441	K	0.475787
442	D	0.593066
443	P	0.5891
444	Y	0.422439
445	L	0.418599
446	H	0.451445
447	H	0.550443
448	F	0.270587
449	A	0.380843
450	Y	0.499883
451	D	0.456339
452	P	0.552609
453	Q	0.538045
454	Y	0.594993
455	F	0.523837
456	L	0.429196
457	N	0.464127
458	E	0.423524
459	L	0.261717
460	D	0.565637
461	L	0.382011
462	L	0.377427
463	G	0.362101
464	Q	0.38396
465	A	0.453211
466	A	0.436573
467	A	0.486139
468	T	0.467275
469	Q	0.507335
470	L	0.432645
471	A	0.451108
472	R	0.555632
473	N	0.470659
474	I	0.482312
475	S	0.418813
476	N	0.420373
477	S	0.475718
478	G	0.396354
479	A	0.426167
480	M	0.480912
481	Q	0.392308
482	T	0.380083
483	Y	0.331104
484	F	0.316167
485	A	0.360673
486	G	0.33921
487	E	0.428473
488	T	0.384204
489	I	0.314881
490	P	0.545661
491	G	0.499218
492	D	0.31051
493	N	0.357212
494	L	0.400715
495	A	0.432349
496	Y	0.452693
497	D	0.522024
498	A	0.506186
499	D	0.532791
500	L	0.504288
501	S	0.405579
502	A	0.315051
503	W	0.419322
504	T	0.211559
505	E	0.22227
506	Y	0.234773
507	I	0.37833
508	P	0.420484
509	Y	0.337454
510	H	0.391158
511	F	0.364167
512	R	0.353251
513	P	0.480485
514	N	0.420334
515	Y	0.509764
516	H	0.632291
517	G	0.53967
518	V	0.566743
519	G	0.641817
520	T	0.680861
521	C	0.673648
522	S	0.566972
523	M	0.703359
524	M	0.523071
525	P	0.334964
526	K	0.333637
527	E	0.400802
528	M	0.405608
529	G	0.468195
530	G	0.556952
531	V	0.668161
532	V	0.629514
533	D	0.650562
534	N	0.457475
535	A	0.459543
536	A	0.459132
537	R	0.599718
538	V	0.620318
539	Y	0.527949
540	G	0.670468
541	V	0.57237
542	Q	0.525577
543	G	0.617598
544	L	0.643173
545	R	0.736088
546	V	0.712455
547	I	0.694536
548	D	0.775308
549	G	0.650664
550	S	0.756306
551	I	0.609789
552	P	0.564127
553	P	0.688015
554	T	0.40644
555	Q	0.443253
556	M	0.492638
557	S	0.412561
558	S	0.477134
559	H	0.539343
560	V	0.490122
561	M	0.472046
562	T	0.485321
563	V	0.528984
564	F	0.518331
565	Y	0.583328
566	A	0.604397
567	M	0.541179
568	A	0.643614
569	L	0.680968
570	K	0.614
571	I	0.582819
572	S	0.618538
573	D	0.537927
574	A	0.373031
575	I	0.543516
576	L	0.374185
577	E	0.381853
578	D	0.319972
579	Y	0.283095
580	A	0.275914
581	S	0.2185
582	M	0.208305
583	Q	0.217451

## Sheet: Conservation Score (all alignme
Score another
# user_input -- js_divergence - window_size: 3 - background: blosum62 - seq. weighting: True
# column number - score - column
0	0.07072	-----------------------M-----------------------------------------------------------------------------
1	0.0615	0
2	0.0644	-----------------------S-----------------------------------------------------------------------------
3	0.06461	-----------------------I-----------------------------------------------------------------------------
4	0.06431	-----------------------T-----------------------------------------------------------------------------
5	0.06428	-----------------------S-----------------------------------------------------------------------------
6	0.06459	-----------------------R-----------------------------------------------------------------------------
7	0.06298	-----------------------A-----------------------------------------------------------------------------
8	0.06389	-----------------------S-----------------------------------------------------------------------------
9	0.06268	-----------------------A-----------------------------------------------------------------------------
10	0.06486	-----------------------R-----------------------------------------------------------------------------
11	0.06334	-----------------------A-----------------------------------------------------------------------------
12	0.06491	-----------------------S-----------------------------------------------------------------------------
13	0.06755	-----------------------C-----------------------------------------------------------------------------
14	0.06506	-----------------------S-----------------------------------------------------------------------------
15	0.06716	-----------------------Q-----------------------------------------------------------------------------
16	0.06426	-----------------------A-----------------------------------------------------------------------------
17	0.06597	-----------------------N-----------------------------------------------------------------------------
18	0.06466	-----------------------T-----------------------------------------------------------------------------
19	0.06469	-----------------------R-----------------------------------------------------------------------------
20	0.06301	-----------------------A-----------------------------------------------------------------------------
21	0.06221	-----------------------G-----------------------------------------------------------------------------
22	0.06381	-----------------------R-----------------------------------------------------------------------------
23	0.06231	-----------------------V-----------------------------------------------------------------------------
24	0.06188	-----------------------A-----------------------------------------------------------------------------
25	0.06105	-----------------------L-----------------------------------------------------------------------------
26	0.06274	-----------------------S-----------------------------------------------------------------------------
27	0.06099	-----------------------G-----------------------------------------------------------------------------
28	0.06082	-----------------------G-----------------------------------------------------------------------------
29	0.06164	-----------------------A-----------------------------------------------------------------------------
30	0.06104	-----------------------L-----------------------------------------------------------------------------
31	0.06242	-----------------------L-----------------------------------------------------------------------------
32	0.06942	-----------------------R-----------------------------------------------------------------------------
33	0.07543	-----------------------P-----------------------------------------------------------------------------
34	0.08286	-----------M-----------A-----------------------------------------------------------------------------
35	0.10404	--------M--R-----------R-----------------------------------------------------------------------------
36	0.1146	-------MA--P-----------P-----------------------------------------------------------------------------
37	0.10932	-------GL--I--------M--A-----------------------------------------------------------------------------
38	0.12893	-------RS--P--------K--R-------M---------------------------------------------------------------------
39	0.12614	-------NT--S--------G--S-------W---------------------------------------------------------------------
40	0.13748	-------WI--I--------I--F-------Q---------------------------------------------------------------------
41	0.13871	---M---FL--L--------V--V-------V---------------------------------------------------------------------
42	0.12323	-M-V---QT--G--------S--P-------L---------------------------------------------------------------------
43	0.14405	-Q-S---VA--A--------W--A------MR---------------------------------------------------------------------
44	0.15961	-T-VM--TA--L-MM-MMM-A--R------WS---------------------------------------------------------------------
45	0.14025	-L-FP--AA--G-IL-LLF-V--K------CW---------------------------------------------------------------------
46	0.18497	-L-LA--MMM-A-PP-SPPMV--Q------LS---------------------------------------------------------------------
47	0.1665	-V-SL--APR-F-RR-RRRAS--Q------LK---------------------------------------------------------------------
48	0.19184	-S-TT--VVH-A-VVMVVVKA-MQ------RR---------------------------------------------------------------------
49	0.18807	-S-LY--VAT-T-ATAAAVLA-GG------GC---------------------------------------------------------------------
50	0.19893	-L-LL--PGAMLMKKRKRRSL-AA------LL---------------------------------------------------------------------
51	0.21691	-V-LL--VLLASAFLFLLLVV-SV------GS---------------------------------------------------------------------
52	0.19095	-V-AL--VFLLAFNNNNNNIL-HR------RP---------------------------------------------------------------------
53	0.19586	-S-AA--GAPRALFSASTSLS-SR------PR---------------------------------------------------------------------
54	0.17411	-L-AA--IFLYAKRRRRHRLA-TG------GG---------------------------------------------------------------------
55	0.17374	-A-TI--MAVLPALLLLLLFT-VG------AA---------------------------------------------------------------------
56	0.16843	-A-VG--AQSNLRLLFVVVRE-SA------LL---------------------------------------------------------------------
57	0.20631	-A-QA--AQSKELSSSSSSSS-DL------AA---------------------------------------------------------------------
58	0.20324	-L-AS--VSFFSALLILLFLL-PS------RW---------------------------------------------------------------------
59	0.20869	-PYYT--NSISTAAAAAAALA-HA------GA---------------------------------------------------------------------
60	0.22064	-HLLV--PAVLLLLLILLLLF-RR------AA---------------------------------------------------------------------
61	0.223	-YPPH--TFPLYLLLLLLLCA-FA------LQ---------------------------------------------------------------------
62	0.24004	-IAAS--IFASGSGGGGGGGN-AS------GG---------------------------------------------------------------------
63	0.20161	-RQQLM-LDLLPVIIFSFLAV-VA------QQ---------------------------------------------------------------------
64	0.22487	-SQQPA-SQAAGAQQQQQQLS-AV------QP---------------------------------------------------------------------
65	0.2065	-NIIST-SIQVAVVIVIIITS-IE------QR---------------------------------------------------------------------
66	0.18491	GGDDQV-APIPSSAAAATAVF-TD------SP---------------------------------------------------------------------
67	0.13837	IIVVQK-AVPTHCRRRFYNSE-GI------LP---------------------------------------------------------------------
68	0.19194	EEQQSV-SLGLASSGSGGGRK-SR------GC---------------------------------------------------------------------
69	0.20318	AASSCI-SGQARAAAAAAAHR-DK------AS---------------------------------------------------------------------
70	0.18798	SSSSN-MLSTASVIIIIIIAT-DV------RC---------------------------------------------------------------------
71	0.25925	LLLLA-PPMTPMLTTTTTTTT-DL------AA---------------------------------------------------------------------
72	0.2536	LLLLP-YSLVILYYYYYYYLT-VS------LV---------------------------------------------------------------------
73	0.21122	TTSSV-TLNNGGDQQQQQQVG-RD------AA---------------------------------------------------------------------
74	0.2705	DDDDT-TGSASSDNHHHHHTN-SS------SS---------------------------------------------------------------------
75	0.24726	PPPPP-IAPTSSAPPPPPPEG-LS------AA---------------------------------------------------------------------
76	0.21718	KKSSS-DMVVFFKTDDDDDRW-QS------GA---------------------------------------------------------------------
77	0.22568	DDKKSDDFGNGGKDDDDDDED-AP------SS---------------------------------------------------------------------
78	0.22487	VVVVFFLTTQVVLLLLLLLVL-HV------EG---------------------------------------------------------------------
79	0.1525	-------SYGPP-PPPPPP----------------------------------------------------------------------------------
80	0.11338	-------DDRG------------------------------------------------------------------------------------------
81	0.09072	-------DAF-------------------------------------------------------------------------------------------
82	0.07057	-------FQ--------------------------------------------------------------------------------------------
83	0.06398	-------AA--------------------------------------------------------------------------------------------
84	0.05932	-------SA--------------------------------------------------------------------------------------------
85	0.06499	-------QQ--------------------------------------------------------------------------------------------
86	0.06615	-------MM--------------------------------------------------------------------------------------------
87	0.06421	-------DD--------------------------------------------------------------------------------------------
88	0.06347	-------GG--------------------------------------------------------------------------------------------
89	0.06491	-------RR--------------------------------------------------------------------------------------------
90	0.06333	-------II--------------------------------------------------------------------------------------------
91	0.06439	-------QQ--------------------------------------------------------------------------------------------
92	0.06129	-------AA--------------------------------------------------------------------------------------------
93	0.0604	-------QR--------------------------------------------------------------------------------------------
94	0.05783	-------GD--------------------------------------------------------------------------------------------
95	0.05964	-------LL--------------------------------------------------------------------------------------------
96	0.06039	-------LL--------------------------------------------------------------------------------------------
97	0.06293	-------SS--------------------------------------------------------------------------------------------
98	0.06347	-------SS--------------------------------------------------------------------------------------------
99	0.06631	-------HH--------------------------------------------------------------------------------------------
100	0.06469	-------FF--------------------------------------------------------------------------------------------
101	0.06302	-------GG--------------------------------------------------------------------------------------------
102	0.06764	-------MP--------------------------------------------------------------------------------------------
103	0.08218	-------YV--------------------------------------------------------------------------------------------
104	0.10805	-------GG-----------------------MM--------------------MM--------------MMM----------------------------
105	0.14418	-------WW-----------------------TSMMMMMMMMMMMMMM-MM---SS--------------TTT----------------------------
106	0.23021	SSAASIVPPGTGPGSGSSSQD-PAMM--MMSGQQAATTTTTTTTTTTT-TNMMMTT--------------TTTMMMMMMM----MMMM---MMMM------
107	0.2845	GGGGSQNGHNDNSDGDGDNSGMTGDT--KKRKAAAATTTTTTTTTTTT-TIQQQHH--------------QQQSSSSSAS----SSSS---NQQQ------
108	0.36097	RRKKTTSQQAAQTVVVVVVSKAKQTS--QEDDRTNNRRRRRRRRRRRRMQKRRRNNMMMMMMMMMMMMMMSSSKQQQQQQMMMMQQQHMMMTQQQMMMMMM
109	0.3913	TTTTSPASSTLTSDDDDDNKSQSKQGMMSSEEEEEEEEEEEEEEEEEEVTEEEEEEEHQQQQQQQQQQQQEEEEEEEEEEEEEEEEEEEEETHHHEEQQQQ
110	0.55475	VVYYLFLFFYYFYYYYYYYYYYYYSFYYYYYYYFYYFFFFYYYYYYYYYFYYYYYYFFFFFFFFFFFFFFYYYFFFFYYFYYYYFFFFYYYYYYYAAAAAA
111	0.66732	DDDDDDDDDDDDDDDDDDDDDDDDDDDDDDSTDDDDDDDDDDDDDDDDDDDDDDDDDDDDDDDDDDDDDDDDDDDDDDDDDDDDDDDDDDDDDDDDDDDDD
112	0.66633	YYYYVFYYYYYYYFFFFFFFYVYYYYYYYYYFYYYYYYYYYYYYYYYYYYYYYYYYYYYYYYYYYYYYYYYYYYYYYYYYYYYYYYYYYYYYYYYFFYFYF
113	0.65609	IIIIVLVVVVVVIIIIIIIIVAIIVIIIIIVIIIIIIIIIIIIIIIIIIIIIIIIIIIIIIIIIIIIIIIIIIIIIIIIIIIIIIIIIIIIIIIIVVVVIV
114	0.66329	IIIIIIIIIIVVVVVVVVVVIIVLVVIIIIVVIIIIIIIIIIIIIIIIIIIIIIIIIIIIIIIIIIIIIIIIIIIIIIIIIIIIIIIIIIIIIIIIIIIII
115	0.64588	AAAAVVIVVVVIVAAAAAAVVIVVVVVVIIVVIIVVCCCCCCCCCCCCIIIIIIIIIIIIIIIIIIIIIIIIIVVVVVVVIIIIIIIIIIIVVVVIIVIII
116	0.71396	GGGGGGGGGGGGGGGGGGGGGGGGGGGGGGGGGGGGGGGGGGGGGGGGGGGGGGGGGGGGGGGGGGGGGGGGGGGGGGGGGGGGGGGGGGGGGGGGGGGGG
117	0.64161	GGGGGGGGGGAGGGGGGGGGGAGGTGAAGGAAAAAAAAAAAAAAAAAAAAAAAAAAAAAAAAAAAAAAAAAAAAAAAAAAAAAAAAAAAAAAAAASSSSSS
118	0.72642	GGGGGGGGGGGGGGGGGGGGGGGGGGGGGGGGGGGGGGGGGGGGGGGGGGGGGGGGGGGGGGGGGGGGGGGGGGGGGGGGGGGGGGGGGGGGGGGGGGGGG
119	0.6391	LLLLTTTTTTNTTTTTTTTVTSTTSSSSSSSSSSSSSSSSSSSSSSSSSSSSSSSSSSSSSSSSSSSSSSSSSSSSSSSSSSSSSSSSSSSSSSSSSSSSS
120	0.66081	TTTTAAAAASAAAAAAAAASAAAAAAAAAAAAAAAAAAAAAAAAAAAAAAAAAAAAAAAAAAAAAAAAAAAAAAAAAAAAAAAAAAAAAAAAAAAAAAAAA
121	0.66846	GGGGGGGGGGGGGGGGGGGGGGGAGGGGGGGGGGGGGGGGGGGGGGGGGGGGGGGGGGGGGGGGGGGGGGGGGGGGGGGGGGGGGGGGGGGGGGGGGGGGG
122	0.59641	LLLLLLLLLLALSLLLLLLLLACCACCCSSCCNNNNNNNNNNNNNNNNNNNNNNNNNNNNNNNNNNNNNNNNNNNNNNNNNNNNNNNNNNNCCCCSSSSSS
123	0.58635	TTTTVVVAAAPAVVVVVVVTVLVVVVVVVVVVVVVVVVVVVVVVVVVVVVVVVVVVVVVVVVVVVVVVVVTTTTTTTTTTVVVVVVVVVVVVVVVAAAAAA
124	0.58436	TTVVLLLMMIVILVVVVVVVLILLVLLLLLLLLLLLLLLLLLLLLLLLLLLLLLLLLLLLLLLLLLLLLLLLLLLLLLLLLLLLLLLLLLLLLLLMMILLL
125	0.68148	AAAAAAAAAAAAAAAAAAAAAAAAAAAAGGAAAAAAAAAAAAAAAAAAAAAAAAAAAAAAAAAAAAAAAAAAAAAAAAAAAAAAAAAAAAAAAAAAAAAAA
126	0.52456	AAAASAARKAYSNSSSSSSDNASNSANNSGGNTTSSTTTTTTTTTTTTTAAAAATTTTTTTTTTTTTTTTAAATTTTTTTAAAATTTTTTADDDDYYYYHY
127	0.71753	RRKKRRRRRRRRRRRRRRRRRRRRRRRRRRRRRRRRRRRRRRRRRRRRRRRRRRRRRRRRRRRRRRRRRRRRRRRRRRRRRRRRRRRRRRRRRRRRRRRRR
128	0.68991	LLLLLLLLLLLLLLLLLLLLLLLLLLLLILLLLLLLLLLLLLLLLLLLLLLLLLLLLLLLLLLLLLLLLLLLLLLLLLLLLLLLLLLLLLLLLLLLLLLLL
129	0.61028	TTTTSSSSSAAATSSGSSSTSSSSSSSSSSTTTTATTTTTTTTTTTTTTTTTTTTTTTTTTTTTTTTTTTTTTTTTTTTTTTTTTTTTTTTSSSSSSSSSS
130	0.62149	EEEEEEEQEEEEEEEEEEEEAEEATEAAEEEEEEEEEEEEEEEEEEEEEEEEEEEEEEEEEEEEEEEEEEEEEEEEEEEEEEEEEEEEEEEAEEEEEEEEE
131	0.50117	NNNNSEKDEDTQDNNNNNNINDDDDNDDDDDDDDDDDDDDDDDDDDDDDDDDDDDDDDDDDDDDDDDDDDDDDDDDDDDDDDDDDDDDDEESSSSNDDDDD
132	0.43462	PPPPKPDGEPGGAPSSSPSPQPSGPPPPVVPPPSAAPPPPPPPPPPPPPAKPPPAASSPPPPPPPPPPPPAAAAAAAEEEAAAAAAAAASSGGGGGGGGSG
133	0.41079	NNKKKGSTGS-AKENKKDDDGARSASSSSSANDDDDDGGGNNNNDDDDDDDGGGDDDDNNNNNNNNNNNNGGGSGGGGGGDDDDDDDDDDDEDDQRRRKRA
134	0.37638	IIIILIVANLHGTWWWWWWVTRVKTVKKNNEHVVVVVVVVVVVVVVVVVVTVVVVVVTTTTTTTTTTTTTVVVVVVVVVVVVVVVVVVVVVHHHHYYYNNN
135	0.48795	SSKKQQNSSSTTQNKNNNNSTNNRTRRRNNRRQSTTTTTTTTTTTTTTTSTSTTSSTTTTSSSSTTTTTTTTTSTTTTTTTTTTSSSSSSSYSSQSSSSSS
136	0.61681	VVVVVVVVVVVVVVVVVIIVVVVVVVVVVVVVVVVVVVVVVVVVVVVVVVVVVVVVVVVVVVVVVVVVVVVVVVVVVVVVVVVVVVVVVVVIVVVVVVVVV
137	0.54276	LLLLGGGAAAAALLLLLLLLALLLVCCCLLLLLLLLLLLLLLLLLLLLLLLLLLLLLLLLLLLLLLLLLLLLLLLLLLLLLLLLLLLLLLLLLLLIIILIV
138	0.63354	VVVVVVVVLVLVVVVVVVVVVLLVALLLVVLLLLLLLLLLLLLLLLLLLLLLLLLLLLLLLLLLLLLLLLLLLLLLLLLLLLLLLLLLLLLLLLLVVVVVV
139	0.65119	IIIIIIIIIIVILIIIIIIIIIVLLILLLLLLLLLLLLLLLLLLLLLLLLLLLLLLLLLLLLLLLLLLLLLLLLLLLLLLLLLLLLLLLLLLLLLIIIILL
140	0.71275	EEEEEEEEEEEEEEEEEEEEEEEEEEEEEEEEEEEEEEEEEEEEEEEEEEEEEEEEEEEEEEEEEEEEEEEEEEEEEEEEEEEEEEEEEEEEEEEEEEEEE
141	0.58338	SSKKGAAAAAAAGAAAAAAAAAAAAAAAAAAAAAAAAAAAAAAAAAAAAAAAAAAAAAAAAAAAAAAAAAAAAAAAAAAAAAAAAAAAAAAAAAAYYAAFF
142	0.64472	GGGGGGGGGGGGGGGGGGGGGGGGGGGGGGGGGGGGGGGGGGGGGGGGGGGGGGGGGGGGGGGGGGGGGGGGGGGGGGGGGGGGGGGGGGGGGGGGGGGGG
143	0.47942	SSFF-SLGGGSGPPPPPPPPNGYPPRPPRRPPGGGGGGGGGGGGGGGGGGGGGGGGGGGGGGGGGGGGGGGGGGGGGGGGGGGGGGGGGGGGGGGVVGGGG
144	0.3116	-------FFYLF-----------------------------------------------------------------------------------------
145	0.39761	YYYYYLSYYYYY-SSSSSSVSRSDRRRRSSKKPPPPPPPPPPPPPPPPPPPPPPPPPPPPPPPPPPPPPPPPPPPPPPPPPPPPPPPPPPPSSSSPPSSTS
146	0.37947	EEEEDRREEEEE-NNNNNNDGPNNDDDDDDDDDDDDDDDDDDDDDDDDDDDDDDDDDDDDDDDDDDDDDDDDDDDDDDDDDDDDDDDDDDDDDDDDDDDDD
147	0.26395	SSSSRLLTMLYL-K-KKKKRYSHTKTTTYYVLYYYYYYYYYYYYYYYYYYYYYYYYYYYYYYYYYYYYYYYYYYYYYYYYYYYYYYYYYYYRKKKVVFFIV
148	0.1257	------------------------------LL---------------------------------------------------------------------
149	0.09198	------------------------------AM---------------------------------------------------------------------
150	0.0684	------------------------------GG---------------------------------------------------------------------
151	0.06279	------------------------------SS---------------------------------------------------------------------
152	0.09044	------------------------------KK---------------------------------------------------------------------
153	0.21344	DDNNT--DDDGNS-K-----D-------PPRRRRRRRRRRRRRRRRRRRRRRRRRRRRRRRRRRRRRRRRRRRRRRRRRRRRRRRRRRRRR----------
154	0.23984	RRDDNGGAAGNNGDDDDDDGD-------WWLLFFFFFFFFFFFFFFFFFLLLLVLLFAFFFFFFFFFFFFLLLFFFFLFFLLLLFFFLMLL----------
155	0.31673	GGGGDDDGGTGGQVAVTATEND-SNHNNDDSQDDDDDDDDDDDDDDDDDDDDDDDDDDDDDDDDDDDDDDDDDDDDDDDDDDDDDDDDDDDSSSSGGGGGG
156	0.34715	PPAAPPPNNVNNGFFFPPPDDPGRRPPPLLWWFFFFFFFFFFFFFFFFFFFFFFFFFFFFFFFFFFFFFFFFFFFFFFFFFFFFFFFFFFFIIIIPPPPPP
157	0.33256	IIIILKKAAALLVEVAEEEFKDVDFLLLLLKKRRRRRRRRRRRRRRRRRRRRRRRRRRRRRRRRRRRRRRRRRRRRRRRRRRRRRRRRRRRFFFFLLFFFF
158	0.46293	IIIIIVVTTSSSLTTTTTTVFITVIIIIIIIITTTTTTTTTTTTTTTTTTTTTTTTTTTTTTTTTTTTTTTTTTTTTTTTTTTTTTTTTTTIIIIIIIIII
159	0.39873	EEEEDDDEEIQQERRRRRRYVLNKGHHHQQHHQQQQQQQQQQQQQQQQQQQQQQQQQQQQQQQQQQQQQQQQQQQQQQQQQQQQQQQQQQQQQQQQQQQQQ
160	0.46331	DDDDVLMVVIIILVVVIVVVVKSIVMMMMMMMMMMMMMMMMMMMMMMMMMMMMMMMMMMMMMMMMMMMMMMMMMMMMMMMMMMMMMMMMMMMMMMMMMMMM
161	0.57061	LLPPPPPPPPPPEPPPPPPPPPIPPPPPPPPPPPPPPPPPPPPPPPPPPPPPPPPPPPPPPPPPPPPPPPPPPPPPPPPPPPPPPPPPPPPPPPPPPPPPP
162	0.39138	NNNNNTTMMGAAIGGGGGGGDSIAAVLLAAAAAAAAAAAAAAAAAAAAAAAAAAAAAAAAAAAAAAAAAAAAAAAAAAAAAAAAAAAAAAATTTTAAAAAA
163	0.39704	AAAAAGGYYLNNP-LLLLLSA-PAAGGGAAAAAAAAAAAAAAAAAAAAAAAAAAAAAAAAAAAAAAAAAAAAAAAAAAAAAAAAAAAAAAAAAAAAAAAAA
164	0.33259	YYYYAPALLASDF-AAAAAYN-LIFFIILLLLLLLLLLLLLLLLLLLLLLLLLLLLLLLLLLLLLLLLLLLLLLLLLLLLLLLLLLLLLLLLLLLLLLLLL
165	0.23587	GGGGNGAFFALA--SEDGDELMATSAAAMMVVAAAAAAAAAAAAAAAAAAAAAAAAAAAAAAAAAAAAAAAAAAAAAAAAAAAAAAAAAAASSSSSSAAAA
166	0.12281	----A------------------------------------------------------------------------------------------------
167	0.09322	----L------------------------------------------------------------------------------------------------
168	0.09627	----G---N--------------------------------------------------------------------------------------------
169	0.10927	----Y---Y--------------------------------------------------------------------------------------------
170	0.12918	----Q---F--------S-----------------------------------------------------------------------------------
171	0.22397	DDQQG-LNFGFYYLTTNLS-YWFRKKLLYYAAYYYFYYYYYYYYYYYYYYYFFFFFYFYYFFFFFFFFFFFFFFFFFFFFFFFFFFFFFFFYYYYFFWWWW
172	0.27333	IIIIAQMYDAFYNSLLLPL-NPPLLMLLPPNNPPPPPPPPPPPPPPPPPPPPPPPPPPPPPPPPPPPPPPPPPPPPPPPPPPPPPPPPPPPPPPPPPPPPP
173	0.28569	FFFFVMLFNNIVLSGPPAP-SAMFFTSSAALLLLLLLLLLLLLLLLLLLLLLLLLLLLLLLLLLLLLLLLLLLLLLLLLLLLLLLLLLLLLMMMMMMMMMM
174	0.25	GGGGFLGFGVGGYEATGSG-AILRRTNNGGCCQQQQQQQQQQQQQQQQQQQQQQQQQQQQQQQQQQQQQQQQQQQQQQQQQQQQQQQQQQQNNNNNNSSSS
175	0.28752	SSTTGGNDYGKKGLGSTRS-VQMSSGSSNNDDGGGGGGGGGGGGGGGGGGGGGGGGGGGGGGGGGGGGGGGGGGGGGGGGGGGGGGGGGGGSSSTMMMMMM
176	0.28887	SSTTNDENMTDDPRSHRTRRNHKPEPKKKKDDKKRRRRRRRRRRRRRRRRRRRRKKKKKKKKKKKKKKKKRRRRRRRRRRKKKKRRRRRKKEEEEEEKKNN
177	0.18153	----SP-GKDPLHP-----DTRS------------------------------------------------------------------------------
178	0.20137	#NAME?
179	0.13612	-------VPTWDP----------------------------------------------------------------------------------------
180	0.10723	-------KLETWL----------------------------------------------------------------------------------------
181	0.13241	-------N-YNQ-----------------------------------------------------------------------------------------
182	0.16691	-------P-SNP-----------------------------------------------------------------------------------------
183	0.22595	-------L-TLG-----------------------------------------------------------------------------------------
184	0.40609	VVVVYYYFFVVVWFIIT-TYYYYLIHLLYYYYYYYYYYYYYYYYYYYYYYYYYYYYYYYYYYYYYYYYYYYYYYYYYYYYYYYYYYYYYYYYYYYYYYYYY
185	0.49628	DDDDDDDDDDDDNDDDDDDIDDDDDTNNDDNNNNNNNNNNNNNNNNNNNNNNNNNNNNNNNNNNNNNNNNNNNNNNNNNNNNNNNNNNNNNAAAADDNNNN
186	0.63597	HHQQWWWWWWWWWWWWWWWWWWWWWWWWWWWWWWWWWWWWWWWWWWWWWWWWWWWWWWWWWWWWWWWWWWWWWWWWWWWWWWWWWWWWWWWWWWWWWWWWW
187	0.30414	-------------------P---------------------------------------------------------------------------------
188	0.48227	AANNENNYYNNGNNNNNNNGQDNNDDAAIICYAAAAAAAAAAAAAAAAAAAAAAAAAAAAAAAAAAAAAAAAAAAAAAAAAAAAAAAAAAAQQQQGGGGGG
189	0.53406	YYYYYFFQQFFFIYYYYYYLFYYLYLFFYYYYFFYYYYYYYYYYYYYYYYYYYYYYYYYYYYYYYYYYYYYYYYYYYYYYYYYYYYYYYYYFFFFFFYYYY
190	0.40097	EELLTEKYYQVHSTTTTTTTHKEFLLQQEEHHEEEEEEEEEEEEEEEEELLEEEKKEEEEEEEEEEEEEEEEEEEEEEEEEEEEEEEEEEEEEEESSLLLL
191	0.56449	TTTTSSSTTATTVTTTTTTNTTTSTTTTTTTTTTTTTTTTTTTTTTTTTTTTTTTTTTTTTTTTTTTTTTTTTTTTTTTTTTTTTTTTTTTTTTTSSSSSS
192	0.44757	VVVVVIVTEQSVLIIVIIIESTVEEEAATTEEDDDDDDDDDDDDDDDDEEDEEEDDEEEEEEEEEEEEEEEEEDDDDDDDDDDDDDDDDDDQDDVEEEEEE
193	0.52194	#NAME?
194	0.55342	EELLQQQQQLQQQQQQQQQSQQMQQQQQEEQQEEEEEEEEEEEEEEEEEEEEEEEEEEEEEEEEEEEEEEEEEEEEEEEEEEEEEEEEEEEEEEEEEEEEE
195	0.4278	LL--RAAPETAADDDQDDDAKEAEPKQQPPRPPPPPPPPPPPPPPPPPPPPPPPPPPPPPPPPPPPPPPPPPPPPPPPPPPPPPPPPPPPPAAAEPPPPPP
196	0.43014	AA--GGAGGSEGTAGAAAAEHGGQEHHNHHGGYHHHHHHHHHHHHHHHHHHHYYFFYHYYFFFFFFFFFFHHHFHYYHHHHHHHYYYHHHHGDDGHHNNHN
197	0.49411	TTIILASLLAWAALLLLLLLMAILLALLMMLLMMMMMMMMMMMMMMMMMMMMMMMMMMMMMMMMMMMMMMMMMMMMMMMMMMMMMMMMMMMLLLLIILLLL
198	0.47939	NNNNGNKAHNNYAGDGGGGNNANADNNNDDDDNDNNNNNNDDDDDDDDNNNDDDNNNNNNNNNNNNNNNNDNNDDDDDNDNNNNNNNNNNNDDDDGGDNNN
199	0.47356	NNNNGADQNDNGDGGGGGGNNGGEGNEGGGGGNNNNNHHHNNNNNNNNNNNNNNNNNYNHNNNNNNNNNNNNNGGGGGGGNNNNNNNNNNDSGGGGGNNNN
200	0.57468	QQRRRKRRRRARRRRRRRRRRRRRRRRRRRRRRRRRRRRRRRRRRRRRRRRRRRRRRRRRRRRRRRRRRRRRRRRRRRRRRRRRRRRRRRRRRRRRRRRRR
201	0.43778	TTTTVAVEESSAVSSSSSSVRSTQEQSSKKVVRRRRRRRRRRRRRRRRRRRRRRRRRRRRRRRRRRRRRRRRRRRRRRRRRRRRRRRRRRRSRRQSSRRRR
202	0.42588	AANNLYYMMLVSLLLLLLLFAFSIIILLVVLLMMMMMMMMMMMMMMMMMMMMMMMMMMMMMMMMMMMMMMMMMMMMMMMMMMMMMMMMMMMLLLLLLIIII
203	0.39219	LLNNSHHFFRHHVNDNNNNDSAYYYPFFGGYYEEEEEEEEEEEEEEEEEEEEEEDDEEEEEEEEEEEEEEEEEEEEEEEEEEEEEEEEEEEHHHHVVTTTT
204	0.51516	IIIIYIIYYYYYYYYYYYYSWWWMWYWWHHWWCCCCCCCCCCCCCCCCCCCCCCCCCCCCCCCCCCCCCCCCCCCCCCCCCCCCCCCCCCCCCCCTTAAAA
205	0.46902	RRKKPPPMMNAAPSPSSSSVPAPAPVPPAAPPGGGGGGGGGGGGGGGGGGGGGGGGGGGGGGGGGGGGGGGGGGGGGGGGGGGGGGGGGGGPPPPPPPPPP
206	0.56243	SSAASRRQQRSRARRRRRRVRRRRRQRRRRRRRRRRRRRRRRRRRRRRRRRRRRRRRRRRRRRRRRRRRRRRRRRRRRRRRRRRRRRRRRRRRRRRRRRRR
207	0.63267	GGGGGGGGGGGGGAAAAAAAGGGGGGGGGGGGGGGGGGGGGGGGGGGGGGGGGGGGGGGGGGGGGGGGGGGGGGGGGGGGGGGGGGGGGGGGGGGGGGGGG
208	0.65011	NNKKKRKKKKKKRKKMKKKRKKRRKRKKKKRRKKKKKKKKKKKKKKKKKKKKKKKKKKKKKKKKKKKKKKKKKKKKKKKKKKKKKKKKKKKRKKKKKKKKK
209	0.56595	GGGGVMMTTTVCVLIIVVVVVGLLVITTVVVVGGGGGGGGGGGGGGGGGGGGGGGGGGGGGGGGGGGGGGGGGGGGGGGGGGGGGGGGGGGVVVVVVVVVV
210	0.677	LLLLLLLLLLLLLLLLLLLALLLLLLLLLLWWLLLLLLLLLLLLLLLLLLLLLLLLLLLLLLLLLLLLLLLLLLLLLLLLLLLLLLLLLLLLLLLLLIIII
211	0.72955	GGGGGGGGGGGGGGGGGGGGGGGGGGGGGGGGGGGGGGGGGGGGGGGGGGGGGGGGGGGGGGGGGGGGGGGGGGGGGGGGGGGGGGGGGGGGGGGGGGGGG
212	0.70505	GGGGGGGGGGGGGGGGGGGGGGGGGGGGGGGGGGGGGGGGGGGGGGGGGGGGGGGGGGGGGGGGGGGGGGGGGGGGGGGGGGGGGGGGGGGGGGGGGGGGG
213	0.66497	SSSSSSSSSSSSTCCCCCCGSSTSSGSSSSSSSSSSSSSSSSSSSSSSSSSSSSSSSSSSSSSSSSSSSSSSSSSSSSSSSSSSSSSSSSSSSSSSSSSSS
214	0.70449	TTTTSSSTTSTSSSSSSSSSSSSSSSSSSSSSSSSSSSSSSSSSSSSSSSSSSSSSSSSSSSSSSSSSSSSSSSSSSSSSSSSSSSSSSSSSSSSSSSSSS
215	0.53702	LLLLAGAAAAGAMSTTTSTIALSASSSSSSSSLLLLLLLLLLLLLLLLLLLLLLLLLLLLLLLLLLLLLLLLLLLLLLLLLLLLLLLLLLLSSSSSSSSSS
216	0.55931	VVIIIIIRRRRRIHHHHHHVVLITMIIIIILLIIIIIIIIIIIIIIIIIIIIIIIIIIIIIIIIIIIIIIIIIIIIIIIIIIIIIIIIIIIIIIIIIIIII
217	0.64163	NNNNNNNGGHNNNNNNNNNNNHNNNNNNNNNNNNNNNNNNNNNNNNNNNNNNNNNNNNNNNNNNNNNNNNNNNNNNNNNNNNNNNNNNNNNNNNNNNNNNN
218	0.53962	GGGGGFFAAYLYGGGGGSGAGAGAAAAAGGAAGGGGGGGGGGGGGGGGGGGGGGGGGGGGGGGGGGGGGGGGGGGGGGGGGGGGGGGGGGGGGGGGGGGGG
219	0.57161	GGDDLMMMMMMMMMMMMMMMLMSTMEMMMMMMMMMMMMMMMMMMMMMMMMMMMMMMMMMMMMMMMMMMMMMMMMMMMMMMMMMMMMMMMMMMMMMMMLMMM
220	0.4798	TTSSTSALLVTAYVVVVVVIYGMLMVVVIIVVCCCCCCCCCCCCCCCCCCCCCCCCCCCCCCCCCCCCCCCCCCCCCCCCCCCCCCCCCCCVVVVVVVVVV
221	0.65914	WWWWIYYYYYYYYYYYYYYFYYYYWFYYYYYYYYYYYYYYYYYYYYYYYYYYYYYYYYYYYYYYYYYYYYYYYYYYYYYYYYYYYYYYYYYYYYYYYYYYY
222	0.49151	TTTTQNGHHQHQSTTTTTTLVMHHVTIIQQVILIIIIIIIIIIIIIIIIIIIIIIIIIIIIIIIIIIIIIIIIIIIIIIIIIIIIIIIIIIVVVVVVVVVV
223	0.66318	RRRRRRRRRRLRRRRRRRRRRRRRRRRRRRRRRRRRRRRRRRRRRRRRRRRRRRRRRRRRRRRRRRRRRRRRRRRRRRRRRRRRRRRRRRRRRRRRRRRRR
224	0.60948	PPPPGPPGGGPGGCGGGGGGPGCGGGGGGGGGGGGGGGGGGGGGGGGGGGGGGGGGGGGGGGGGGGGGGGGGGGGGGGGGGGGGGGGGGGGGGGGGGGGGG
225	0.49565	HHDDSSCSSTTTPSSSPSSTSHAAFHHHNNHHNNNNNNNNNNNNNNNNNNNNNNNNNNNNNNNNNNNNNNNNNNNNNNNNNNNNNNNNNNNHHHHHHHHHH
226	0.53396	KKKKRAAKKRKKSRKKRKEAEPPAAPEEPPAAAAAAAAAAAAAAAAAAAAAAAAAAAAAAAAAAAAAAAAAAAAAAAAAAAAAAAAAAAAAAAAAAAAAAS
227	0.42765	AAVVEEAGGGGSSDDDDDDLTAEGSSEDMMEELLLLLLLLLLLLLLLLMMMLLLMMMMMMMLLLLLLLLLMMMMMMMMMMMMMMLLLLMMMCCCCCCEEEE
228	0.53487	QQQQDDDAASSSDDDDDDDDEDDDDDDDDDDDDDDDDDDDDDDDDDDDDDDDDDDDDDDDDDDDDDDDDDDDDDDDDDDDDDDDDDDDDDDDDDDDDDDDD
229	0.54728	VVIIYIIYYYLYWWWWWWWFVFFYYFYYYYYYYYYYYYYYYYYYYYYYFLLFFFYYLLLLLLLLLLLLLLYYYFFFFYYYFFFFFFFFFFFYFFFFFFFFF
230	0.55394	DDDDDDDDQDDQDDNNNNNDNASDDDQHEEENDDDDDDDDDDDDDDDDDEEDDDDDDDDDDDDDDDDDDDDDDDDDDDDDDDDDDDDDDDDDDDDDDNNDD
231	0.40418	SSSSADDMKQRRRNSKYHYGVAAAERAAKKRRNHGGNNNNNNNNNNNNEGQHHHNNNNNNNNNNNNNNNNGGGGGGGNGGHHHHGGGNNNHEEEEHHRRRR
232	0.6453	WWWWWWWWWWWWMYWWWWWWWWWWWWWWWWWWWWWWWWWWWWWWWWWWWWWWWWWWWWWWWWWWWWWWWWWWWWWWWWWWWWWWWWWWWWWWWWWWWWWWW
233	0.42565	EEEEGASAAAAAAAAAAAAESAV-AAEEAAQHAAAASAAASASSSSSSASAAAAAAAAAAAAAAAAAAAAAAAAAAAAAAAAAAAAAAAAAVEEESSEEEE
234	0.3754	TTKKNNSDDEEDAEGDEDESKEE-AAQQKKRRKKAATTTTTTTTTTTTKKTKKKSSQQKKKQQQQQQQQQKKKEEEEKKKSSSSKKKKKTTEEEAQQEEQE
235	0.34706	VVVVAKKHELDMIIIVIIVLLAE-REAAPPQQIQHHHHHHHHHHHHHHLLHRRRMMQEEEEEEEEEEEEEEEELLLLLLLLLLLEEEAAMMQQQESSLLLL
236	0.31098	FFFFFLLVVTVVTTITTTT-AT--A--AEE--PPAAKKKKQQKKKKKKPKKPPPPPPPPPPPPPPPPPPPPPPPPPPPPPSSSSPPPKPPS----------
237	0.52058	GGGGGGGGGGSGGGGGDGGGGGGGGGGGGGGGGGGGGAGGGGGGGGGGGGGGGGGGGGGGGGGGGSGGGGGGGGGGGGGGGGGGGGGGGGGGGGGGGGGGG
238	0.35563	NNMMNVLDDDDDDNDNNDDNGDAVPAG-MMAALLLLLLLLLLLLLLLLLLLLLLLLLLLLLLLLLLLLLLLLLLLLLLLLLLLLLLLLLLLAAAAAAAAAA
239	0.41976	EEEEGKPDDEEQSQQRQQQHSEKERDERDEREEEEEEEEEEEEEEEEEEEEEEEEEEEEEEEEEEEEEEEEEEEQEEEEEEEEEEEEEEEEEKKKRRQSKK
240	0.43553	GGGGPGGSSSSSGAGDAGAGGRGG-GYYSSGGDENNDDDDRNNNNNNNDNNDDDDDRHHHNNNNNNNNNNDDDDDDDNDDDDDDDDDDDDDGGGGGGGGGG
241	0.28946	----E---------------R--------------------------------------------------------------------------------
242	0.59436	WWWWWWWYYWWYWFLLLLLWWWWWWWWWWWWWWWWWWWWWWWWWWWWWWWWWWWWWWWWWWWWWWWWWWWWWWWWWWWWWWWWWWWWWWWWWWWWWWWWWW
243	0.42017	NNNNTTSRTGNASSGSKSSGSSESSSGGDDDDNDTTTAAATTTTTTTTNTTGSSTTTSSSSSSSSSSSSSSSSTTTTTTSSSSSSSSTSSSSNNNAAAAAA
244	0.57513	WWWWFWWWWWFWWWWWWWWWWWYSYFWWYYYYYYYYYYYYYYYYYYYYYYYYYYYYYYYYYYYYYYYYYYYYYYYYYYYYYYYYYYYYYYYYYYYYYYYYY
245	0.46069	DDDDDSNDEDDEDDDDDDDENEEEARKYAAAALLLLLLLLLLLLLLLLLAARRRLLLLLLLLLLLLLLLLLLLLLLLLLLLLLLLLLHLLLQQQQAAAAAA
246	0.44618	NNNSAEEKKSNNKSSSNSSGSGNDDDRRHHHHQSDDDDDDDDDDDDDDNDDDDDDDDNDDDDDDDDDDDDDDDDDDDDDDDDDDDDDDDDDEAAADDDDDD
247	0.50713	VVMMLLLWWVMFIIIIVIVMLLMVVVAACCCCCCCCCCCCCCCCCCCCCCCVVVCCCCCCCCCCCCCCCCCCCCCCCCCCCCCCCCCCCCCCCCCVVVVVV
248	0.5429	AAFFLLLLLFLLYLLLLLLLLLKLLQFLLLLLLLLLLLLLLLLLLLLLLLLLLLLLLLLLLLLLLLLLLLLLLLLLLLLLLLLLLLLLLLLLLLLLLLLLL
249	0.57118	AAEEPPPPPPPPPPPPPPPPSPPSGKAEPPPPPPPPPPPPPPPPPPPPPPPPPPPPPPPPPPPPPPPPPPPPPPPPPPPPPPPPPPPPPPPPPPPPPPPPP
250	0.56897	YYYYYYYYHYYFYVAIIVIYGSYWYYLLYYYYYYYYYYYYYYYYYYYYYYYYYYYYYYYYYYYYYYYYYYYYYYYYYYYYYYYYYYYYYYYYYYYYYYYYY
251	0.59597	SSMMFFLFFFIFFMIMMMMFMFFFFFFFFFFFFFFFFFFFFFFFFFFFFYYFFFFFYYYYYYYYYYYYYYFFFFFFFFFFFFFFFFFFFFFFFFFFFFFFY
252	0.52419	LLKKKKKQQQMEIKKKKKKIKMRVRIKKKKRRKKRRRRRRRKKKKKKKRKKRRRRRRRRRRRRRRRRRRRRRRRRRRRRRRRRRRRRRRRRRRRRKKKKKK
253	0.57992	QQKKRRKKRRKKKRKKNKKKKAKQRRKRRRKKRKKKKKKKKKKKKKKKKKKKKKKKKKKKKKKKKKKKKKKKKKKKKKKKKKKKKKKKKKKRRRKRRRRRR
254	0.46565	AAAAYSSSGSSSSAAVTAASSNAAISLLLLAAASAAAAAAAAAAAAAAAAAAAAAASAAAAAAAAAAAAAAAAAAAAAAAAAAAAAAAAAAAAAAMMMMMM
255	0.52376	EEEEEEQVIVQLEEEEEEEEEEEEEEEEEEQQEEEEEEEEEEEEEEEEEEEEEEEEEEEEEEEEEEEEEEEEEEEEEEEEEEEEEEEEEEEEEEEEEEEEE
256	0.39194	RRAARNKHKNRHVKKKKKKNHDGTNGHCKTGKTTTTTTTTTTTTTTTTTTTTTTTTTTTTTTTTTTTTTTTTTTTTTTTTTTTTTTTSTTTSNNTNNHHHH
257	0.33737	AAAAWLLFFVFFLFFFFFFFF-Y-V----T-----------------------------------------------------------------------
258	0.32902	RRRRHEESSTTTTSTSSSSTR-N-T----F-----------------------------------------------------------------------
259	0.26143	AATAAPSGGPPPPKQEQKQRG-P-A----G-----------------------------------------------------------------------
260	0.29077	PPPPPIDPPAPASDDDDDDPP-H-A----S-----------------------------------------------------------------------
261	0.28685	NNTTTELENNNNVSFFFFFTVHPNWNNNTKHHRRRRRRRRRRRRRRRRRRRRRRRRRRRRRRRRRRRRRRRRRRRRRRRRRRRRRRRRRRRWWWWSSSSSS
262	0.19997	AAAALPPTTMNDGSTSLSSPKVDAHAQQFKEEDDDDDDDDDDDDDDDDDDDDDDDDDDDDDDDDDDDDDDDDDDDDDDDDDDDDDDDDDDDIIITQQHHHH
263	0.20799	KKAASSNNNTNA-HDDDNDES--DF-RR-------------------------------------------------------------------------
264	0.18999	QQQQAAIPPGLL-KQQQQQLVS-FVVFFG-LLIIIAVVVVVIVVVVVVIIIIIIIIIIIIVVVMVVVVVVIIIIIIIIIIVIIIIIIIIVVHDDGGGGGGG
265	0.11737	-------------PS--------------------------------------------------------------------------------------
266	0.14501	-------------VVSSSS----------------------------------------------------------------------------------
267	0.19851	IILLTSKRRRRR-KKVMVVA----S----------------------------------------------------------------------------
268	0.2954	AAAAGCQPPFFGGGGEEDDHQGHGGFDDAGGGGGGGGGGGGGGGGGGGGGGGGGGGGGGGGGGGGGGGGGGGGGGGGGGGGGGGGGGGGGGGGGGGGGGGG
269	0.253	AAAADPRAAPRARHHGGGGENGPPDSKKTDAAPPAAPPPPPPPPPPPPAGGAAAPPAPPPEEEEEEEEEEPPPPPPPPPPPPPPPPPPPSAEEEAQQEEEE
270	0.26507	GGGGLVDNNNNNNIIHHHHGQDNGDGSSKPSNNNNNNNNNNNNNNNNNNNNNNNNNNNNNNNNNNNNNNNNNNNNNNNNNNNNNNNNNNNNDDDDEEEEDE
271	0.13039	------A----------------------------------------------------------------------------------------------
272	0.11154	------N----------------------------------------------------------------------------------------------
273	0.11393	------LAA--------------------------------------------------------------------------------------------
274	0.12668	------FTTTAAT-------L--------------------------------------------------------------------------------
275	0.15934	----N-PAATTTT------NQ--------------------------------------------------------------------------------
276	0.17455	HHHHS-FLVVPVG------II--------------------------------------------------------------------------------
277	0.19981	YYSYD-LNNTTQE------TQ--------------------------------------------------------------------------------
278	0.22707	FFFFG-ADDYYYL--IIIIWY-I------------------------------------------------------------------------------
279	0.33845	NNNNLSDNDDDDDDDDDDDDNGD--TNED-R-DD--DDDDDDDDDDDDDDDDDDDDDDDDDDDDDDDDDDDDDDDDDDDDDDDDDDDDDDDTEEEGGGGGG
280	0.31572	AAAASP-TKPPPPPPPPPPDA-P-----D------------------------------------------------------------------------
281	0.37623	SSTTAK-AASAASSSSSSASG-AA----Q--M--AA-----------------------------------------------------------------
282	0.42394	CCCCVVSFWGVVIVVVVMVVSILY-WYHFYYYYYYYYYYYYYYYYYYYYYYYYYYYYYYYYYYYYYYYYYYYYYYYYYYYFFFFYYYYFYYYYYYWWWWWW
283	0.47186	HHHHHHQTSFLLHHHHHHHRHHHHSHHHRRRRHHHHHHHHHHHHHHHHHHHHHHHHHHHHHHHHHHHHHHHHHHHHHHHHHHHHHHHHHHHRRRRRRRRRR
284	0.51847	GGGGGGGAANGGGGGGGGGGGGGGGGGGGGGGGGGGGGGGGGGGGGGGGGGGGGGGGGGGGGGGGGGGGGGGGGGGGGGGGGGGGGGGGGGGGGGGGGGGG
285	0.4073	VVTTTTTSSKRNKGFNFHRHSKTSVTTVHHAGGGGGGGGGGGGGGGGGDDDGGGGGGGGGGGGGGGGGGGGGGGGGGGGGGGGGGGGGGAAGGGGTTTTTT
286	0.29467	---------A-G-----------------------------------------------------------------------------------------
287	0.44434	NNNNDGDGGGRQQDDDDDDDNDVGTNDDHHDDDDDDDDDDDDDNNSSSSHSEDDDEDDDDDDDDDDDDDDEEEEEEDEEDEEEEDDDDDTSDDDSNNDDDD
288	0.57947	GGGGGGGGGGGGGGGGGGGGGGGGGGGGGGGGGGGGGGGGGGGGGGGGGGGGGGGGGGGGGGGGGGGGGGGGGGGGGGGGGGGGGGGGGGGGGGGGGGGGG
289	0.48097	TTTTRPAPPPRPIKKKMLLPPPPPPPEEPPPPPPPPPPPPPPPPPPPPPPPPPPPPPPPPPPPPPPPPPPPPPPPPPPPPPPPPPPPPPPPPPPPPPPPPP
290	0.5031	VVVVIIIVVLLLVLLLLLLVIMAMLLLLIILLVVVVVVVVVVVVVVVVVVVVVVLLVVVVVVVVVVVVVVVVVVVVVVVVVVVVVVVVVVVVLLVLLLLLL
291	0.46309	HHQQSHHHHHDSASSSSSSRGPKRHGAAKKRHSSHHSSSSSSSSSSSSSSSSSSRRSSSSSSSSSSSSSSSSSSSSSSSSSSNSSSSSSSSGSSGYYHHHH
292	0.44772	AASSITTVVVVVTVVVVVVYTVVVIVVVLLVVVVVVVVVVVVVVVVVVVVVVVVVVIVVVVVVVVVVVVVVVVVVVVVVVVVVVVVVVVVVTTTTVVVVVV
293	0.38034	GGGGSSSGATTTSVSVVVVSTWTESSSSRRSSATTTTTTTTTTTTTTTTAAAAATTTATTTTTTTTIITTTTTAATATTTTTTTTTTTTATCCCCQQQQQQ
294	0.35158	PPAAYIAYYWYYSAAAASAYWIHNRNDDRRRRTTTTTTTTTTTTTTTTTTTTTTTTTTTTTTTTTTTTTTTTKTTTTTTTTTTTTTTTTTTNAANRRRRRR
295	0.25629	RRRR-GS-----P---------G--------------------------------------------------------------------GGGGGGG-GG
296	0.36842	DDDD-PPPPPPSN------PPPPP--------PPSSSSSSSSSSSSSSPPPPPPPPCPPPSSSSSSSSSSPPPPPPPPPPPPPPPPPPPPPNNNNKKP-PP
297	0.21739	TTNN-WWFYNNHWSASSSSNADIRQLLLGGGGKKKKKKKKKKKKKKKKKKKKKKKKKKKKKKKKKKKKKKKKKKKKKKKKKKKKKKKKKKKDKKDRRV-VV
298	0.22824	GGGGNQHQLYYYSYYYYYYYVDAYRAKKPPKKEAPPPPPPPPPPPPPPKDNNNNAAPHPPPPPPPPPPPPAAAAAAAAAAIIIIAAAAAMMMMMMDDSGKK
299	0.25097	DDQQNAVVTGAVYTSTTTT-TEFTSEDYAATTGGGGGGGGGGGGGGGGGNGDDDGGGNGGGGGGGGGGGGGGGGGGGGGGDGGGGGGGGGGETTK---G--
300	0.19778	DDPPF-------E---------L---------------------------------------------------------------------------F--
301	0.28579	YYWWF-------TNNNNNNIYVSNPPLIDDNNNNNNVVVVAVVAVVVVNNNNNNNNNNNNVVVVVVVVVVNNNNNNNNNNNNNNNNNNNNNLLLL---T--
302	0.32537	SSSST--NNSNQDAIVVVVYDSQKRNNNNNHHNNNNNNNNNNNNNNNNNNNNNNNNNNNNNNNNNNNNNNNNNNNNNNNNNNNNNNNNNNNNNNNNNNNNN
303	0.40573	PPPPGPPAAPGSPSSSSSSPPPPQSPPPPPPPEPPPPPPPPPPPPPPPVVVVVVEEPPPPPPPPPPPPPPPPPPPPPPPPPPPPPPPPEEEPPPPPPPPPP
304	0.40333	IIIIVIFIIWLFLFFFFFFGVLILVTLLLLLLLLLLLLLLLLLLLLLLLLLLLLLLLLLLLLLLLLLLLLLLLLLLLLLLLLLLLLLLLLLLLLLLLLLLL
305	0.34821	VVMMDEESSSAA-NNNNNNLETTHTSSSFFHHYYFFFFFFFFFFFFFFFFFFFFFFFFFFFFFFFFFFFFFFFFFFFFFFFFFFFFFFFFFYYYYFFFFFF
306	0.32777	KKKKIEDSSTST-DDDNDDGRQKTARKKQQCQGRAAEEEEEEEEEEEEHHHQHHAAAHEEEEEEEEEEEEHHHHHHHHHHHHHHHHHHHHHQRRQHHHRHH
307	0.39597	AAAAPSDWWWWW-LLLLLLRFADAAASAAAAAATAAAAAAAAAAAAAAAAAAAAAAAAAAAAAAAAAAAAAAAAAAAAAAAAAAAAAAAAAAAAAAAAAAA
308	0.42545	LLLLLLLVVILAILLLLLLLIFIFWFFFFFFFFFMMMMMMMMMMMMMMMMMMMMMMMMMMMMMMMMMMMMMMMMMMMMMMMMMMMMMMMMMFFFFFFFFFF
309	0.33115	MMMMTLLDDEVQILFLLLLYKMLFLVVVFFLLIIVVVVVVVVVVVVVVVVVVVVVVIIVVIIIIIIIIIIVVVVVVVVVVVVVVVVVVVVVIIIIVVIIVI
310	0.35886	SSNNQAPRKQRKSEEEEEQETTQKAQQQDDEQREEEEEEEEEDDDDDDEEEDEEEEEEETEEEEEEEEEEEEEEEEEEEEAAAAEEEEEEEDDDEEEQEEE
311	0.4489	AATTAAAAAGGAATTTTTTAAASAASAAAAAAAAAAAAAAAAAAAAAAAAAAAAAAAAAAAAAAAAAAAAAAAAAAAAAAAAAAAAAAAAAAAAAAAAAAA
312	0.21095	-----FL----------------------------------------------------------------------------------------------
313	0.31882	VVVVGDDLLLFFLATTTTTADGSAACGGGGTAGGGGGGGGGGGGGGGGGGGGGGGGGGGGGGGGGGGGGGGGGGGGGGGGGGGGGGGGGGGGGGGGGGGGG
314	0.3024	EESSIEKADERLNKKKRKKLSNIERQMMVVQRIKVVVVVVVVVVVVVVVVVVVVVVVVVVVVVVVMMMVVVVVVVVVVVVVVVVVVVVVVVQKKKHHAKKK
315	0.3355	DDAAAATKSADEEEEEEEEHMANEEEEEEEQQEQQQQQQQQQQQQQQQQQQQQQQQQQQQQQQQQQQQQQQQQQQQQQQQQQQQQQQQQQQQEEDQQQQQQ
316	0.31547	RRLLLASMFIIMLLLLLLLISLVVCMAAAAAAAAAAAAAAAAAAAAAAAAAAAAAAAAAAAAAAAAAAAAAAAAAAAAAAAAAAAAAAAAAAAAAAAAAAA
317	0.44139	GGGGGRGGGGGGGSNVSSSGGGGGGGKNGGGGGGGGGGGGGGGGGGGGGGGGGGGGGGGGGGGGGGGGGGGGGGGGGGGGGGGGGGGGGGGGGGGGGGGGG
318	0.22578	------------GGADDDD----------------------------------------------------------------------------------
319	0.22442	------------PEEEEEE----------------------------------------------------------------------------------
320	0.39237	VVVVLLYFFILLYFFFFFFIALILFLIIYYYYYYFFYYYYYYYYYYYYYYYYYYYYYYYYYYYYYYYYYYFFFYYYYYYYYYYYYYYYYYYYYYYFFFFFF
321	0.30093	PPPPGQAPSLAASPPPPPPQIPRTAPSNNNPPPPPPPPPPPPPPPPPPPPPPPPPPPPPPPPPPPPPPPPPPPPPPPPPPPPPPPPPPPPPPPPPEEEEEE
322	0.32873	TTVVPRRENPAVPFFFFFFPNRQPAYFFKKLFAERRRRRRRRRRRRRRRRRRRRRRRRRRRRRRRRRRRRRRRRRRRRRRRRRRRRRRRRRKEEEVVLTMV
323	0.37914	KKQQTPPAVDIRIKKKKKKRNIVNANNNTTTTTTTTTTTTTTTTTTTTTTTTTTTTTTTTTTTTTTTTTTTTTTTTTTTTTTTTTTTTTTTTTTTTATTTT
324	0.34187	KKQQQAKQQTRNLLLLLLLLDPHSRPGGPPEEEEDDDDDDDEDDDDDDDDDDDGDDDDDDDDDDDDDDDDDDDEEEEDEEDDDDEDDDEDDDSSQDDDEDE
325	0.5101	DDDDNEDGGDGCDDDDDDDDPDDDPDDDDDDDDDDDDDDDDDDDDDDDDDDDDDDDDDDDDDDDDDDDDDDDDDDDDDDDDDDDDDDDDDDDDDDDDDDDD
326	0.4846	FFFFPPPFFFLFFMMMLLLPYHFF-FFFVVMMVVLLLLLLLLLLLLLLLLLLLLLLLLLLLLLLLLLLLLLLLLLLLLLLLLLLLLLLLLLYYYYYYYYYY
327	0.51268	GGLLDYYSSNNQNNNNNNNNNNNNNNNNNNNNNNNNNNNNNNNNNNNNNNNNNNNNNNNNNNNNNNNNNNNNNNNNNNNNNNNNNNNNNNNNNNNNNNNNN
328	0.4976	CCCCGSSNNTGSNDDDDDDGGTTDSGGGGGGGGGGGGGGGGGGGGGGGGGGGGGGGGGGGGGGGGGGGGGGGGGGGGGGGGGGGGGGGGGGGGGGGGGGGG
329	0.45753	GGGGGGGGGGGGGGGGGGGGNGDWPAAEFFFFYYYYYYYYYYYYYYYYYYYYYYYYYYYYYYYYYYYYYYYYYYYYYYYYYYYYYYYYYYYYYYYEESSSS
330	0.36544	DDHHDASNVTQESRKNKNKQNQVSRSHYRRQQQQQQQQQQQQQQQQQQQQQQQQQQQQQQQQQQQQQQQQQQQQQQQQQQQQQQQQQQQQQQQQQKKKKKK
331	0.39302	PPPPDHHLLLLLPPPPPPPNHMGHPQQQQQQQQQQQQQQQQQQQQQQQQQQQQQQQQQQQQQQQQQQQQQQQQQQQQQQQQQQQQQQQQQQQQQQQQQQQQ
332	0.32449	HHRRSLVLLNILLLIVHHHT-IPDEEEDEEEEEEEEEEEEEEEEEEEEEEEEEEEEEEEEEEEEEEEEEEEEEEEEEEEEEEEEEEEEEEEEEEEEEEEEE
333	0.2272	-----------------------H-----------------------------------------------------------------------------
334	0.21712	----------------------TA-----------------------------------------------------------------------------
335	0.44448	GGGGLGGGGGGGGGGGGGEGGGGGGGGGGGGGGGGGGGGGGGGGGGGGGGGGGGGGGGGGGGGGGGGGGGGGGGGGGGGGGGGGGGGGGGGGGGGGGGGGG
336	0.33319	VVVVFFFRKSSQVLLLLLLVTVVYFAVVFFFFFFFFFFFFFFFFFFFFFFFFFFFFFFFFFFFFFFFFFFFFFFFFFFFFFFFFFFFFFFFFFFFFFFFFF
337	0.2564	----PYY------------FY--------------------------------------------------------------------------------
338	0.28134	----NRR------------NV--------------------------------------------------------------------------------
339	0.3918	SSSSFSSSSSASATGTAAAQATGGCGGGGGGGGGGGGGGGGGGGGGGGGGGGGGGGGGGGGGGGGGGGGGGGGGGGGGGGGGGGGGGGGGGGGGGGGGGGG
340	0.36938	MMMMGLLYYWYFWWWWWWWPLPLTEIFFPPWWPPPPPPPPPPPPPPPPPPPPPPPPPPPPPPPPPPPPPPPPPPPPPPPPPPPPPPPPPPPPPPPPPLLLL
341	0.41131	FFIIAFWIIATGFTTNTTTFSNFFTYYYFFMMMMMMMMMMMMMMMMMMMMMMMMMMMMMMMMMMMMMMMMMMMMMMMMMMMMMMMMMMMMMMMMMMMMMMM
342	0.39757	PPMMSTATTPLMQQQQQQQASSAQVQQQDDDDDDDDDDDDDDDDDDDDDDDDDDDDDDDDDDDDDDDDDDDDDDDDDDDDDDDDDDDDDDDHHHHEEEEEE
343	0.3987	NNNNHLIHHISYYYYYYYYIILRVVMVVSSMMRRRRRRRRRRRRRRRRRRRRRRRRRRRRRRRRRRRRRRRRRRRRRRRRRRRRRRRRRRRMMMMQQQQQQ
344	0.46041	TTNNSDDTTTTTTTTTTTTDDMNMTTTTQQTTTFTTTTTTTTTTTTTTTTTTTTTTFTTTTTTTTTTTTTTTTSSTSTTTTTTTTTTTTTTTTTTTTTTTT
345	0.35031	LLLVLRRIIIIIMIIIIIIAKIVQQIQQVVIITVVVVVVVVVVVVVVVVVVVVVVVVVVVVVVVVVVVVVVVVVVVVVVVVVVVVVVVVVVVVVVIIIITT
346	0.33431	HHDDDTSNNNQNRDDDDDDATRFDRRKKHHHHTTTTTTTTTTTTTTTTTTTTTTTTTTTTTTTTTTTTTTTTTTTTTTTTTTTTTTTTTTTDKKDHHHFWW
347	0.2077	-------PP--A-----------------------------------------------------------------------------------------
348	0.20557	----P----PP------------------------------------------------------------------------------------------
349	0.23221	EEEEASKYFLGT-QNHQHH---P---------PPAAPPPPPPPPPPPPPKPPPPPPPPPPPPPPPPPPPPPPPKKKKKPPPPPPPPPPPPP----------
350	0.37864	DDNNTTKTTSNTNRHNGRNTNDNKRNHNNNEQNKNNRRRRKKKKKKKKHNKQRRKKKQQQQQQQHHHHHHKNNKNNNNKNKKKKEEEQKKKKNNKNNNARR
351	0.44334	QQQQGPPRRQQMGGAAAAAWWGGGGNGGGGGGGGGGGGGGGGGGGGGGGGGGGGGGGGGGGGGGGGGGGGGGGGGGGGGGGGGGGGGGGGGGGGGGGGGGG
352	0.42557	VVVVNVVRRKHHSEEEEEETQRTTARQQRRKKRRRRRRRRRRRRRRRRRRRRRRRRRRRRRRRRRRRRRRRRRRRRRRRRRRRRRRRRRRRIVVVRRRRRR
353	0.6665	RRRRRRRRRRRRRRRRRRRRRRRRRRRRRRRRRRRRRRRRRRRRRRRRRRRRRRRRRRRRRRRRRRRRRRRRRRRRRRRRRRRRRRRRRRRRRRRRRRRRR
354	0.50668	SSVVSSSEEDAEESSSSSSSSVVAFCWWVVWWAAAAAAAAAAAAAAAAASSAAASSSAAAAAAAAAAAAAAAASSSSAAAAAAAAAAAAAAAAAAWWWWWW
355	0.56075	DDDDYYYTTSSSDSSSSSSSFTSDSSSSSSSSSSSSSSSSSSSSSSSSSSSSSSSSSSSSSSSSSSSSSSSSSSSSSSSSSSSSAAASSSSSSSSSSSSSS
356	0.55892	AAAAAASAASSSASSSSSSASVAMTTSSAAATTTTTTTTTTTTTTTTTTTTTTTTTTTTTTTTTTTTTTTTTTTTTTTTTTTTTTTTTTTTTTTTAAAAAA
357	0.51698	AAAAAVASSEKEAAAAAAARRAAYAAAASSAAAAAAAAAAAAAAAAAAAAAAAAAAAAAAAAAAAAASAAAAAAAAAAAAAAAAGGGAAAASSSSAAAAAA
358	0.5504	RRRRNSSSSTTTTTTTTTTRNETRDVRRRRCSRRRRRRRRRRRRRRRRRRRRRRRRRRRRRRRRRRRRRRRRRRRRRRRRRRRRRRRRRRRNNNNNNNNSS
359	0.51195	EEAAGGGSSSASSASASSSNGAGQAGAAAAAAGGGGGGGGGGGGGGGGGGGGGGGGGGGGGGGGGGGGGGGGGGGGGGGGGGGGGGGGGGGAAAAAAAAAA
360	0.62636	WWWWYYFYYFYFYYYYYYYHYWYYYYFFYYYYYYYYYYYYYYYYYYYYYYYYYYYYYYYYYYYYYYYYYYYYYYYYYYYYYYYYYYYYYYYYYYYYYYYYY
361	0.58148	LLLLYYLLLLLLFLLLLLLYLLLLLLLLLLLLLLLLLLLLLLLLLLLLLLLLLLLLLLLLLLLLLLLLLLLLLLLLLLLLLLLLLLLLLLLLLLLLLLLLL
362	0.37648	LLLLGAARRQDRAEEEEEEDDTTKKRHHHHHRDDDDDDDDDDDDDDDDDDDDDDDDDDDDDDDDDDDDDDDDDDDDDDDDDDDDDDDDDDDRSSSKKKKKR
363	0.4399	PPPPQPPEEQPRDGSSSSTPPPPPPPDGPPPPITRRQQQQQQQQQQQQQMMMMMLLTQQQQQQQQQQQQQEEEQQQQTTVQQQQQQQQQQQRRRRPPPPPP
364	0.35631	NNNSTVIAASLAKTTTTTTAIESVAAVVAAAAAAAAAAAAAAAAAAAAAAAAAAAAAAAAAAAAAAAAAAAAAAAAAAAAAAAAAAAAAAAAAAAAAAAAA
365	0.24872	----E--LL-I-F--------VV------------------------------------------------------------------------------
366	0.34622	YYYYRMIMVLGLL------VSCLLMLILMMLLKKKKRRRRKKKKKKKKKKKKKKKKKKRRKKKKKKKKKKKKKKKKKKKKRRRRRRRRRKKMKKKLLLLLL
367	0.34988	QQQQCGDEEKRAG------SKAAGRGDSKKSSQQATAAAATTGGVAVVSEGPPPPPQGGGSSSSSSSSSSKKKKKKKKKKPPPPGGGESGSKKKKKKKKKK
368	0.52593	RRRRRRRSSTNYRGGGGRGRRRRRRRRRRRRRRRRRRRRRRRRRRRRRRRRRRRRRRRRRRRRRRRRRRRRRRRRRRRRRRRRRRRRRRRRRRRRRRRRRR
369	0.4774	PPSPSPPNNTLPSNDDDDDPSPPRKKPPKKTPPSPPPPPPPPPPPPPPKPPDDDPPPPPPPPPPSPPPPPDSSPPPPSSSNNNNPPPPPKKSSSSPPGDPP
370	0.65385	NNNNNNNNNNNNNNNNNNNNNNNNNNNNNNNNNNNNNNNNNNNNNNNNNNNSGGNNNNNNNNNNNNNNNNTTTNNNNTTTNNNNNNNNNNNNNNNNNNNNN
371	0.57487	LLLLLLLLLLLFLVVVVVVYLLLLLLLLLLLLLLLLLLLLLLLLLLLLLLLLLLLLLLLLLLLLLLLLLLLLLLLLLLLLLLLLLLLLLLLLFFFVVVVVV
372	0.47304	QQEEHKKNNTIMHHHHHHHHHTTQRTDDEEKRTTTTEEEEEEEEEEEETTTHHHTTKTTTTTTTTTTTTTSTTTTTTTTTTTTTTTTTKTTTKKTKKTGQE
373	0.52587	VVIILVVIIVIVVVVVVVVFVIVVVVIIVVAAIIIIIIIIIIIIIIIIIIIIIIIIIIIIIIIIIIIIIIIIIIIIIIIIIIIIIIIIIIIVLLLLLLILL
374	0.42217	LLLLLLVFYYYFLLLLLLLLLMALLVIIQQEEEEVVVVVVVVVVVVVVEILVVVVVIIRRRRRRRRRRRRVVVVVVVVVVIIIIVVVVVVVRIIMVVVVIV
375	0.4268	TTTTTETTILQQVVVLVVVSTTVTTTTTTTAVTTTTTTTTTTTTTTTTTTTTTTTTTTTTTTTTTTTTTTTTTTTTTTTTTTTTTTTTTTTKKKKKKNY--
376	0.45871	GGGGGNNRRHSSNNNNNNNDGGEGGREDRREQHRHHHHHHHHHHHHHHHHHHHHHHHHHHHHHHHHHHHHHHHHHHHHHHHHHHHHHHHHHGGGGGGGGRR
377	0.47053	QQQQAATTTTTTATTTTSTTHTCAAAAAAATTAAAAAAAAAAAAAAAAAAAAAAAAAAAAAAAAAAAAAAAAAAAAAAAAAAAAAAAAAAAVVVV----CC
378	0.4196	YYMMVQVLLMHLTLLRHRHTTLMATLHHFFLLTVVVLLLLLLLLLLLLTMTTTTLLTLLLMMMMMMMMMMLLLLLLLLLLLLLLLLLTLLLVVVTFFFLFF
379	0.54039	VVVVVVAVAAAAVVVVVVVVVTAVAVAAVVVVTTTTAAAAAAAAAAAATTTTTTTTTTTTTTTTTTTTTTTTTSSTTTTTTTTTSSSTTTTTVVAAAAAAA
380	0.41184	GGGGTCCKKLKKDTTTTTTATRETTLTSTTSSDDDDDDDDDDDDDDDDDNNDDDDDDDDDDDDDDDDDDDDDDDDDDDDDDDDDDDDDDDDRQQHRRRRRR
381	0.55942	KKKKRRRRKKRRRRRRRRRRGRKKRKKKKKRRVVRRRRRRRRRRRRRRIKKRRRRRRHHHHHHHHHHHHHRRRRRRRKKKRRRRRRRRRKRKRRRKKKRKK
382	0.56987	VVVVIIVVVIIIVIVIIIIVILIVVIVILLVVIIVVIIIIIIIIIIIIIIIIIIIIIIIIIIIIIIIIIIIIIVVVVVIVIIIIIIIIIIIVIIIIIVIII
383	0.43749	LLLLILLLLGLLVVLVVFVIIKVNVVLLNNLLEELLLLLLLLLLLLLLELLLLLLLLLIIIIIIIIIIFILLLLLLLLLLLLLLLLLLRLLLLLLVVIVVV
384	0.47519	LLFFWLTFFFFFQSSPSSSFFLLIIFFFFFFFFFFFFFFFFFFFFFFFFFFFFFFFFFFFFFFFFFFFFFFFFFFFFFFFFFFFFFFFFFFILLLLLIIII
385	0.44064	SSKKDSDDDDSDSAATAAADDESDDNEEEEEEEESSSSSSDDDDDDDDENNAAASSEEAADDDDDDDDDDEEEDDDDEEEEEEESSSDDEDKEEEEEEEEE
386	0.25148	----KDSDE-----S--------------------------------------------------------------------------------------
387	0.34827	QQQQKANQNGNGKEGGGGGGRKSQGGDDGGGGGGGGGGGGGGGGGGGGGGQGGGGGNGGGCGGGGGGGGGGGGGGGGGGGGGGGGGGGGGGNEEGGGNNNN
388	0.23542	NNTTKSE---DKSNNKNNN-S-DA-----------------------------------------------------------------------------
389	0.21725	GGAA-DD-----GGGTEGG-G-EA-----------------------------------------------------------------------------
390	0.25187	TTSS-GG------TTNTTT-K-KG-----------------------------------------------------------------------------
391	0.23645	TTGGAIS------DD-DDN-N-VK-----------------------------------------------------------------------------
392	0.34372	PPPPTPMNKTTKGFFFFFFTASPADTRRNNTTKKKKKKKKKKKKKKKKKKKKKKKKKKKKKKKKKKKKKKKKKKKKKKKKKKKKKKKKKKKKKKKKKGGGG
393	0.47091	RRQQKVRRKTVRPRRRRRRRQHRQRRKKKKRRRRRRRRRRRRRRRRRRKQQRRRRRRKRRRRRRRRRRRRRRRRRRRRRRRRRRRRRRRRRQRRKRRRRRR
394	0.53784	AAAAAAAAAAAAVSKTSSSAAVAAAAAAVVAAAAAAAAAAAAAAAAAAAAAAAAAAAAAAAAAAAAAAAAAAAAAAAAAAAAAAAAAAAAAAAAAAAAAAA
395	0.47078	VVVVVETTNSTVNVVVVVVVTSKLVTVVTTVVVVVVTTTTSSSSSSSSSIIVIIVVVSVVVVVVVVVVVVVVVVVIVVVVTTTTIIISVVVIVVVVVVTTT
396	0.57148	GGGGGGGGASGAGEEEEEEGGAGGGGGGGGGGGGGGGGGGGGGGGGGGGGGGGGGGGGGGGGGGGGGGGGGGGGGGGGGGGGGGGGGGGGGGGGGGGGGGG
397	0.55784	VVVVVVVVVVVVVFFFFFFVVILVVVVVVVVVVVVVVVVVVVVVVVVVVVVVVVVVVVVVVVVVVVVVVVVVVVVVVVVVVVVVVVVVVVVVVVIVVVVVV
398	0.42245	EENNEEETEDRQEAAAAAAEHEIEEQSSTTEESRSATTTTATTTTTTTREEHHHQQAEEEEEEEEEEEEEAAATTTTRSRSRRRSSSSDAAEEEEEEEEEE
399	0.46502	FFFFYLVVVVVLYTVVVVVYYLFFYYYYFFYYYYYYFFFFYYYYYYYYYYYYYYWWYWWWWWWWWWWWWWYYYYYYYYYYYYYYYYYYYYYIFFFIIIIII
400	0.27883	GGGGAHQNQRSDHDDDDDDLAASSQIIIKKVIEELLLLLLLLLLLLLLFIILLLLLLLLLLLLLLLLLLLLLLLLLLLLLLLLLLLLLLFFEEEEEEEEEE
401	0.26236	TTTTVHHTTSSTLAAAAASPAGTTSAQKKKKKRQHHHHHHRRRRRRRRKQIVVVRHHEEEEEEEEEEEEEVVVVVVVIQVKKKKVVVIQKKVLLQAARRRR
402	0.28429	HHNNGADDDPEQSDNGNNNSSPSDDNKKNNNDKKHHGGGGGGGGGGGGGGGGGGNNGGGGGGGGGGGGGGGGGGGGGGGGGGGGGGGGGGGGAASGGRGGG
403	0.16055	------------N----------G-------------------------AA--------------------------------------------------
404	0.18368	------------G------RS-RP--NN--------------------TDDNNN--ADEEDDDDDDDDDDDDDDDDDASADDDDNNNNE------------
405	0.18865	KKKK--------T------GN-DT--MM--------------------NKQSSS--SSSSSSSSSSSSSSSSSSSSSATAAAAAGGGAA------------
406	0.28323	GGAANGGGGVGGGSSGSSSGEEGGGGHHGGGGGGGGSSSSSNSSSSSSTRNSSSDDNTTTTTTTTTTTTTDDDEEEEEEEGGGGDDDNKEEGGGGRRGGGG
407	0.19314	NNVVDAAFFGQYSPPPPPPGAGQEQTQHRKQQQQNNAAAAEEEEEEEETDNEEEQQTIIIIIIIIIIIIITTTEEEEEEETTTTNNNDDSSKEEETTRRRR
408	0.25251	TTNNKRIEKRERTKKRKKKISLRRTLQQEESSAPVARRRRRRRRRRRRPLLGGGPPPPPPPPPPPPPPPPRRRRRRRRRRGGGGPPPAVPAVLLIFFVTIT
409	0.25976	HHFFFYHWWFYYLIKKKKKSHAFLRNVVHHHHQKLVVVVVAAAAAAAAQKQIIIQQQTSSTTTTTTTTTTIIIVVVVVVVQQQQVAVTTQQQRRKSSEEEE
410	0.25232	NNDDTAVQKTTTHQQQVVVTTTYSITKKTTRKRQNNTTTTTTNSTTTTHKRDDDRRERKKRRRRRRRRRREQQEEEEEEETTTTTTTESTTSTTQTTTVVV
411	0.31298	VVVVVVLIILLLALLLLLLAVVVAVATTVEAAVAAAAAAAAAAAAAAAVVAAAAAAVAAAAAAAAAAAAAVAAAAAAAAAAAAAAAAAAVAVCCCIIVVVV
412	0.27555	YYFFKSSGESSTTRETTTQFHTPEYETTNSYYRRQQHHHHHHHHHHHHKMLHHHTTHMTTTTTTAAAAATRRRRRRRRRRHYYYHHHRRQKYFFFRRKKKR
413	0.20714	-----------------------L-----------------------------------------------------------------------------
414	0.22858	-----------------------A-----------------------------------------------------------------------------
415	0.50592	AAAAAAAAAAAAAAAAAAAAA-APAADS-AAVAAAAAAAAAAAAAAAAAAVAAAAAAAAAAAAAAAAAAAAAAAAAAAAAAAAAAAAAAAAAAAAAAAAAA
416	0.45244	KKKKSRQRKRRRNKKKKKKANASGRSSGA-SSRRRRRRRRRRRRRRRRRNKRRRRRRRNNNNNNNNNNNNRRRRRRRRRRRRRRRRRRRRRNKKNRRNNNN
417	0.53443	HHHHKRRKKRNKKKKKKKKKKSKGRQGGKKKRRRRRRRRRRRRRRRRRKKRRRRRRRKKKKKKKKKKKKKKKKKKKKKKKRRRRRRRRRRRTNNKRRRRRR
418	0.70609	EEEEEEEEEEEEEEEEEEEEEEEEEEEEEEEEEEEEEEEEEEEEEEEEEEEEEEEEEEEEEEEEEEEEEEEEEEEEEEEEEEEEEEEEEEEEEEEEEEEEE
419	0.64088	VVVVVVVVVIVVVVVVLVLVVILVVIVVVVVVVVVVVVVVVVVVVVVVIVVVVVVVVVVVVVVVVVVVVVVVVVVVVVVVVVVVVVVVVVVVVVVVVVVVV
420	0.62689	LLLLVIIIIIIVIIIIIIILIIIIVVILIIIILLLLLLLLLLLLLLLLLLLLLLLLLLLLLLLLLLLLLLLLLIIIILIILLLLLLLLLLLLIIVIIIIII
421	0.62288	LLLLLLLLLVVLVVVLLLLVILLMLVLLLLLLLLVVVVVVVVVVVVVVLLLVVVLLLLLLLLLLLLLLLLLLLVVVVVVVLLLLVVVLLLLLSSSIIVVVV
422	0.64711	AAAASSSSSSSSSSASSSSASSSCCTSSSSSSCCCCCCCCCCCCCCCCCCCCCCCCCCCCCCCCCCCCCCCCCSSSSCSCCCCCCCCCCCCSSSSAASSSS
423	0.59472	AAAAAAAAAAAAAGGGAAAAGASAAALLGGGGAGSSSSSSSSSSSSSSAAAAAAGGAAAAAAAAAAAAAAGGGSSSSSSSGGGGSSSAAAAAAAAAAAAAA
424	0.6397	GGGGGGGGGGGGGGGGGGGGGGGGGGGGGGGGGGGGGGGGGGGGGGGGGGGGGGGGGGGGGGGGGGGGGGGGGGGGGGGGGGGGGGGGGGGGGGGSSSSSS
425	0.57294	SSSSSSAVVAAATVVFVVVAASVAAAAAAAAAAAAAAAAAAAAAAAAAAAAAAAAAAAAAAAAAAAAAAAAAAAAAAAAAAAAAAAAAAAASSSSSSSSSS
426	0.55102	AAAALVFMMLFFFIIIIIILILIVVIVVIIIIIIIIIIIIIIIIIIIIIIIIIIIIIIIIIIIIIIIIIIIIIIIIIIIIIIIIIIIIIIIVIIIIIFFFF
427	0.5065	VVIIRQQRRQKQGNAAAAAHNEGHNGNGNNNNAAAAAAAAAAAAAAAAAAAAAAAAAAAAAAAAAAAAAAAAAAAAAAAAAAAAAAAAAAAGGGGNNNNNN
428	0.65796	SSSSSSSSSSTSTSSSSSSTSSTTSTTTSSSSSSSSSSSSSSSSSSSSSSSSSSSSSSSSSSSSSSSSSSSSSSSSSSSSSSSSSSSSSSSSSSSSSSSSS
429	0.71219	PPPPPPPPPPPPPPPPPPPPPPPPPPPPPPPPPPPPPPPPPPPPPPPPPPPPPPPPPPPPPPPPPPPPPPPPPPPPPPPPPPPPPPPPPPPPVVVPPPPPP
430	0.63924	TTLLQQQQQQQQHQQQQQQQQAQFQKQHQQQQQQQQQQQQQQQQQQQQQQQQQQQQQQQQQQQQQQQQQQQQQQQQQQQQQQQQQQQQQQQQQQQKKKKKK
431	0.63799	IIIIILILLLLLLIIIIVVVILVLLLLLLLLLIILLLLLLLLLLLLLLIIILLLIIIIIIIIIIIIIIIIIIILLLLLLLIIIILLLIIIILLLLLLLLLL
432	0.71007	LLLLLLLLLLLLLLLLLLLLLLLLLMLLLLLLLLLLLLLLLLLLLLLLLLLLLLLLLLLLLLLLLLLLLLLLLLLLLLLLLLLLLLLLLLLLLLLLLLLLL
433	0.65873	EEEEEEEMMMMMLMMMMMMQQMMKMMMMQQMMQQQQQQQQQQQQQQQQQQQQQQQQQQQQQQQQQQQQQQQQQQQQQQQQQQQQQQQQQQQQQQQMMMMMM
434	0.58878	YYYYLLQVVVVVNNNNNNNLLRLHLLLLLLLLRRRRRRRRRRRRRRRRRRRRRRRRRRRRRRRRRRRRRRRRRRRRRRRRRRRRRRRRRRRLLLLLLLLLL
435	0.76323	SSSSSSSSSSSSSSSSSSSSSSSSSSSSSSSSSSSSSSSSSSSSSSSSSSSSSSSSSSSSSSSSSSSSSSSSSSSSSSSSSSSSSSSSSSSSSSSSSSSSS
436	0.71892	GGGGGGGGGGGGGGGGGGGGGGGGGGGGGGGGGGGGGGGGGGGGGGGGGGGGGGGGGGGGGGGGGGGGGGGGGGGGGGGGGGGGGGGGGGGGGGGGGGGGG
437	0.66419	IIIIVIIIIIIVIIIIIIIVIIIVIVVVIIIVVVVVVVVVVVVVVVVVVVVVVVVVVVVVVVVVVVVVVVVVVVVVVVVVIIIIVVVVVVVIIIIIIIIII
438	0.69577	GGGGGGGGGGGGGGGGGGGGGGGGGGGGGGGGGGGGGGGGGGGGGGGGGGGGGGGGGGGGGGGGGGGGGGGGGGGGGGGGGGGGGGGGGGGGGGGGGGGGG
439	0.51575	MMLLNDDPPPPPDGEDGGGPDRPPDPAADDNNNNRRPPPPPPPPPPPPPEQAAAPPNDNNNNNNNNNNNSPPPPPPPPPPPPPPPPPPPPPPPPPPPPPPP
440	0.48739	KKKKKPPKKRAANRRQRRRRKEASRAAASSAAPPSSGGGGGGGGGGGGESSPPPAAAAPPAAAAAAAAAAAAARRRRARAAAAAAAAAAKKKKKKAAAAAA
441	0.47581	SSSSTSADEEAASEKEEEEDNNAADAAAEEDDEETTEEEEAAAAAAAADTTDDDDDESEEEEEEGEEEEEEEEAAAAKAKEEEEAAAAADDATTTAAAKAA
442	0.40124	IIVVLVIHTTNTTVVAEEELLVEEHHEEHHDDHWWWWWWWWWWWWWWWVFFLLLLLLLLLLLLLLLLLLLVVVLLLLLLLLLLLLLLLLLLVVVVHHHHHH
443	0.58106	LLLLLLLLLLLLLLLLLLLLLLLLLLLLLLLLLLLLLLLLLLLLLLLLLLLLLLLLLLLLLLLLLLLLLLLLLLLLLLLLLLLLLLLLLLLLLLLLLLLLL
444	0.4481	EEDDEEHEEEEQAGQKQQQENRAKARKKRRKKEKRRRRRRKKKKKKKKNKKRRRRRKKRRAAAAAAAAAANNNEEEEEEEQQQQRRRRNQQEEEDKKKKKQ
445	0.45028	PPQQSGQQKRRQSAAAAAAAGEKEEEEESSKKEEEEEEEEEEEEEAEEESSAAASSQAQQEEEEEEEEEEKKKSSSSSSSRRRRDDDERGRQKKKEEDEDE
446	0.49231	LLAALALLLHYHYNVVIIILLAHFHNHHLLLLFLLLLLLLLLLLLLLLFMMLLLLLFFFFFFFFFFFFFFLLLLLLLLLLLLLLLLLLLLLAAAAHHMMLM
447	0.54534	GGNNNGKGDGGGNGGGGGGNGGNGDGGGGGGGDGDDDDDDDDDDDDDDDDDDDDDDDDDDDDDDDDDDDDDDDDDDDDDDDDDDDDDDDDDGGGGGGGGGG
448	0.6071	IIVVIIIIIIIIVIIVVVVIIVIIIIIVIIIIIIVVIIIIIIIIIIIIIIIVVVIIIIIIIIIIIIIIIIIIIIIIIIIIIIIIIIIIIIIIVVIIIIIII
449	0.53114	DDTTPAPPPPPPTDDDDDDPDTPPDPASEEPPPPPPPPPPPPPPPPPPSDDQQQDDPPPPPPPPPPPPPPPPPPPPPPPPPPPPPPPADPSATTEDDEEDD
450	0.49936	TTQQVCCVVVLLPTTTTTTIVCVVTVLLPPVVVVLLVVVVIIIIVVVVPVVLLLLLVLVVLLLLLLLLLLVVVVVVVVVVLLLLVAVLLVVVPPVLLVVVV
451	0.51431	VVLLVRIRLVVVILLLLLLIVRVVVVVVRRVVVVVVVVVVVVVVVVVVVVVVVVVVVVVVVVVVVVVVVVVVVVVVVVVVVVVVVVVVVVVKVVKVVKKKK
452	0.42263	VVLLVVISSKAAAVIVIIISVVRSYQHHIICCHHHHLLLLLLLLLLLLHHHHHHHHHHHHHHHHHHHHHHHHHHHHHHHHQQQQHHHHHHHHYHHAAAAVA
453	0.49954	DDDDDAGDDEDDHDDNDDDDDKDNHDDDHHHHEEDDDDDDDDDDDDDDVDDDDDHHDHDDDEEEEEEEEDDDDDDDDDDDAAAADDDEEDDDHHTDDDDDD
454	0.51418	LLLLINNLRLRRVNNNNNNLLALLALLLLLLLLLLLLLLLLLLLLLLLLLLLLLLLLLLLLLLLLLLLLLLLLLLLLLLLLLLLLLLLLLLLLLLRRRRRR
455	0.59131	PPPPPTRSPAPPPPPPPPPPPPPAPPPPPPPPPPPPPPPPPPPPPPPPPPPPPPPPPPPPPPPPPPPPPPPPPPPPPPPPPPPPPPPPPPPPPPEPPPPPP
456	0.53153	#NAME?
457	0.66572	VVVVLVVVVVVVVVVVVVVVVLVVVVVVVVVVVVVVVVVVVVVVVVVVVVVVVVVVVVVVVVVVVVVVVVVVVVVVVVVVVVVVVVVVVVVVVVVVVVVVV
458	0.70478	GGGGGGGGGGGGGGGGGGGGGGGGGGGGGGGGGGGGGGGGGGGGGGGGGGGGGGGGGGGGGGGGGGGGGGGGGGGGGGGGGGGGGGGGGGGGGGGGGGGGG
459	0.54958	LLIIESNQQQQQKKKKRKKSELEQCEKKEEQQEEEERRRRQQQQQQQQQEEQQQAAEEEEEEEEEEEEEEQQQEEEEEEEEEEEAAAQEEEEQQKQQAAQQ
460	0.73984	NNNNNNNNNKNNNNNNNNNNNNYNNNNNNNNNNNNNNNNNNNNNNNNNNNNNNNNNNNNNNNNNNNNNNNNNNNNNNNNNNNNNNNNNNNNNNNNNNNNNN
461	0.68537	LLMMLLLMMMLLLLLVLLLLLLLLLLLLFFLLLLLLLLLLLLLLLLLLLLLLLLLLLLLLLLLLLLLLLLLLLLLLLLLLLLLLLLLLLLLLLLLLLLLLL
462	0.62047	QQQQQQQQQWQQTSSSSSSQQMQQLQQQEEQQQQQQQQQQQQQQQQQQQQQQQQQQQQQQQQQQQQQQQQQQQQQQQQQQQQQQQQQQQQQQQQQQQQQQQ
463	0.64981	DDDDEEEDDEDDDDDDDDDDDDDDDDDDDDDDDDDDDDDDDDDDDDDDDDDDDDDDDDDDDDDDDDDDDDDDDDDDDDDDDDDDDDDDDDDDDDDDDDDDD
464	0.57728	QQQQQHKTTHHHYQQQQQQQHHHQHHHHHHHHHHHHHHHHHHHHHHHHHHHHHHHHHHHHHHHHHHHHHHHHHHHHHHHHHHHHHHHHHHHHHHHHHHHHH
465	0.25895	---------------------L-------------------------------------------------------------------------------
466	0.35361	TTTTFTL--PTISAGAAAATVLFPLFLLLLLLLLLLLLLLLLLLLLLLLLLLLLLLLLLLLLLLLLLLLLLLLLLLLLLLLLLLLLLLLLLLLLLLLMMMM
467	0.29437	TTTTIML--FLITAAASAATSGSAVGDDEEEEEEEEEEEEEEEEEEEEEEEEEEEEEEEEEEEEEEEEEEEEEEEEEEEEEEEEEEEEEEEEEEEEEEEEE
468	0.27501	AATTASS--FAYVTTTTTTFAAPCTVIIVVIIMMMMMMMMMMMMMMMMMMMVVVMMMMMMMMMMMMMMMMMMMLLLLLLLMMMMLLLMMMMVVVVVVFFFF
469	0.32015	TTTTGAA--GGAIISLLLLPGGGLVDTTYYYYYYYYYYYYYYYYYYYYYYYYYYYYYYYYYYYYYYYYYYYYYYYYYYYYYYYYYYYYYYYYYYYYYYYYY
470	0.34157	VVVVTVVIIIPPLIVVLLLFMNPTLILLVVIIIIIIIIIIIIIIIIIILLLMIILLLLLLLLLLLLLLLLLLLLLLLLLLLLLLLLLLLLLFFFFIIFFFF
471	0.325	RRSSDSVIITSSTMMLMMMVSLMAGVMMQQQQQQQQQQQQQQQQQQQQQQQQQQQQQQQQQQQQQQQQQQQQQQQQQQQQQQQQQQQQQQQQQQQQQQQQQ
472	0.39385	SSSSFYYLLHYYWLFFFFFYFYLAFACCHHQHYYYYFFFFYYYYYYYYYYYYYYYYYYYYYYYYYYYYYYYYYYYYYYYYYYYYYYYYYYYYYYYQQQQQQ
473	0.26896	RRRRLEEGGQRRSDDDDDDTKAIPDEAAAAAAEEEEEEEEEEEEEEEEEKKAAAEEEEEEEEEEEEEEEEAAAAAAAAAASSSSAAAAAAAAHHHEEVVIV
474	0.36145	IIAAVCLPPVVVVTTTTTTWPTRVVLAACCCCCCCCCCCCCCCCCCCCCCCCCCCCCCCCCCCCCCCCCCCCCCCCCCCCCCCCCCCCCCCCCCCCCSSSS
475	0.36671	TTSSRAATTNNDNTTTTTTDKKAKEKNNKKTTKKKKKKKKKKKKKKKKKKKTTTKKKKKKKKKKKKKKKKTTTTTTTTTTKKKKKKKTKKKHQQKTTTTTT
476	0.28789	SSSADDPVNLALSLLLLLLSNKKEKTSSEQRQKEEEEEEEEEEEEEEEQQQKKKKKEEEEEEEEEEEEEEQQQQQQQQQQQQQQQQQQKEEQKKQQQKKKK
477	0.33421	AAAAGGGPPVIITPPPPPPAKHKKDDRRPPPPPPPPPPPPPPPPPPPPPPPPPPPPPPPPPPPPPPPPPPPPPPPPPPPPPPPPPPPPPPPPPPPPPPPPP
478	0.28409	GGGGVITVITTTTISNNNNVKLGYSETEVVIIIIVIVVVVVVVVVVVVVVVVVVVVVVVVVVVVVVVVVVVVVVVVVVVVVVVVVVVVVVVIIIIIIVVVV
479	0.241	AAAAVMMKRAGQTTTTTTTTDPTDLSPPSSTTSSSSSSSSSSSSSSSSSSSSSSSSSSSSSSSSSSSSSSSSSSSSSSSSSSSSSSSSSSSTTTTTTSSSS
480	0.12945	-----------------------G-----------------------------------------------------------------------------
481	0.10437	-----------------------I-----------------------------------------------------------------------------
482	0.08333	-----------------------A-----------------------------------------------------------------------------
483	0.07176	-----------------------I-----------------------------------------------------------------------------
484	0.08789	-----------------------S-----------------------------------------------------------------------------
485	0.11856	-------------------P---D-----------------------------------------------------------------------------
486	0.16459	-----SS------------N---H-----------------------------------------------------------------------------
487	0.22448	GGGGTVLVV-S-L---DDDVA-WIFFIIMMLLLLLLLLLLLLLLLLLLLLLLLLLLLLLLLLLLLLLLLLLLLLLLLLLLLLLLIIILLLLLLLLLLLLLL
488	0.27807	QQQQLDDEE-S-Y---YYYTG-DYADGGQQHHYYYYYYYYYYYYYYYYYYYYYYAAYYYYYYYYYYYYYYYYYYYYYYYYYYYYYYYYYYYNNNNYYYYYY
489	0.2886	GGGGDSSSSTNSD---DDDTP-FNAKVVPPSSPPPPPPPPPPPPPPPPPPPPPPPPPPPPPPPPPPPPPPPPPPPPPPPPPPPPPPPPPPPSGGSSSSSSS
490	0.23964	QQQQALVHHESAL---VVVFT-IEEYAASSAAAAAAAAAAAAAAAAAAAAAAAAAAAAAAAAAAAAAAAASSSSSSSSSSAAAAAAAAAAAKKKKEEWWWW
491	0.28631	AAAALFLSSLILI---AAALS-LKKRFLLLQQLLLLLLLLLLLLLLLLLLLLLLLLLLLLLLLLLLLLLLLLLLLLLLLLLLLLTTTLLLLLLLLLLLLLL
492	0.1717	----GKR-----T------TV--------------------------------------------------------------------------------
493	0.1835	----NDD----LK------NT--------------------------------------------------------------------------------
494	0.20123	----NPP----NN------TG--------------------------------------------------------------------------------
495	0.1902	AAVVAAEQQAPAE--D---TD-RG-KSSNNKKKKQQKKKKKKKKKKKKKKKQQQKKKQQQQQQQQQQQQQKKKLLLLLLLLLLLKKKKQQQGDDGNNPPPP
496	0.27758	WWFFTLLLLIETTDDF---WA-PQ-LFFKKPPWWWWWWWWWWWWWWWWWWWWWWLLWWWWWWWWWWWWWWWWWWWWWWWWWWWWWWWLWWWLWWLLLWWWW
497	0.26958	FFFFFLRMLNFFFYFD---AK-LI-HIILLLLYYWWWWWWWWWWWWWWYYYWWWYYWWWWWWWWWWWWWWWWWWWWWYWYFFFFWWWLFFFIFFIFFFFFF
498	0.18399	AAAALEKGGQIEADDV---TA-GR-WPPKKRRNNNNNNNNNNNNNNNNNNNNNNNNNNNNNNNNNNNNNNNNNNNNNNNNNNNNNNNNNNNSSSSSSWWWW
499	0.24631	TTNNAEENGQTANVVD---ED-GK-MRRMMKKQQQQQQQQQQQQQQQQQQQQQQQQQQQQQQQQQQQQQQQQQQQQQQQQQQQQQQQQQQQKKKKKKQQQQ
500	0.16668	FFFF---KK--------------------------------------------------------------------------------------------
501	0.1531	NNTT---ED--------------------------------------------------------------------------------------------
502	0.23482	EEEEEHHTTAEQDDDAAAAQSPLRPLGGPPVVPPPPPPPPPPPPPPPPPPPPPPPPPPPPPPPPPPPPPPPPPPPPPPPPPPPPPPPPPPPGGGGAAGGGG
503	0.2393	TTTTQQQLLLAASAAAAAARYSLAGWLVFFCCKKAAKKKKKKKKKKKKKAAAAAAAKKKKKKKKKRRRKKAAAAAAAAAAKKKKAAAGKKKLLLLRRVVVV
504	0.25463	FFFFQSKPPLQNLAAILLLVVRAIQAVSIIIIIIIIIIIIIIIIIIIIIIIIIIIIIIIIIIIIIIIIIIIIIIIIIIIIIIIIIIIIIIIIIIIIIAAAA
505	0.30326	GGGGNLLRRQRRALLVTTTLNLMALGGGGGGGGGGGGGGGGGGGGGGGGGGGGGGGGGGGGGGGGGGGGGGGGGGGGGGGGGGGGGGGGGGGGGGGGGGGG
506	0.25262	DDDDLYYASAQ-QITEEEEYSQVSILLLLLLLAALLLLLLLLLLLLLLAAAAAAAAAAAAAAAAAAAAAAAAAAAAAAAAIIIIAAAAAAATTATVVAAAA
507	0.17849	YYYY-ATIIL---------D------FF-------------------------------------------------------------------------
508	0.23613	SSAA-KERDN-D-EE----QA-K-SESSQQEEEEEEDEEEEEEEEEEEEEEEEQEEEEEEEEEEEEEEEEEEKEEEEEEEEEEEQQQQEEEREEEEEQQQQ
509	0.11397	EEPP---------------H---------------------------------------------------------------------------------
510	0.09783	KKQQ---------------L---------------------------------------------------------------------------------
511	0.14141	AAAA---------------P---------------------------------------------------------------------------------
512	0.13772	HHRR---------------S---------------------------------------------------------------------------------
513	0.17441	EEDE---ED----------V---------------------------------------------------------------------------------
514	0.40092	LLLLYNAYYQYYWWWWWWWWV-WYYYYYWWWWWWWWWWWWWWWWWWWWWWWWWWWWWWWWWWWWWWWWWWWWWWWWWWWWWWWWWWWWWWWWWWWWWWWWW
515	0.28736	LLLLRHHNNYNHTKTNDEDTS-FLLTIVIILLLLMMMMMMMMMMMMMMLLLLLLLLLLLLLLLLLLLLLLMMMLMMLLLLLLLLLLLLLLLIIIILLLLLL
516	0.31817	NNNNTSSENKSEAKNNNDKLY-FLLMFFFLWWFFLLILLLLLLLLLLLFFFFFFFFFFFFFFFFFFFFFFFFFFFFFFFFFFFFFFFFFFFLLLLLLLLFF
517	0.31951	TTTTNGGQHSNRSSSSSSSTT-FGRFKKGGKRFKNKNNNNNNNNNNNNKLNAAALLNGGGGGGGGGGGGGLLLNKNNNNNNNNNLLLTNSNQTTTFFSSFF
518	0.35759	KKKKKAARRQPAHHHHRRRRS-GGRRRRRRFFGGGGGGGGGGGGGGGGGGGGGGGGGGGGGGGGGGGGGGGGGGGGGGGGGGGGGGGGGGGKRRRKKKKKK
519	0.31979	LLLLTLLKTQPATTTASSSPL-KRRSKEKKTTKTTTTTTTTTTTTTTTTKTTTTTTTTTTTTTTTTTTTTTTTTTTTTTTTTTTKKKNSTTDKKKTTGGSR
520	0.22514	-----SS---R------------------------------------------------------------------------------------------
521	0.48583	EEDDGGGGGGGGGGGGGGG-G-GGGGGGGGGGGGGGGGGGGGGGGGGGGGGGGGGGGGGGGGGGGGGGGGGGGGGGGGGGGGGGGGGGGGGGGGGGGGGGG
522	0.28162	QQQQASCLLPVIPPPPPPP-K-PGMPFFAAEDIVIILLLLLLLLLLLLIIITTTIIIVIIVVVVIVVVVVIIIIIIIIIIVVVVLLLIIIILLLLDDLLLL
523	0.36992	WWWWFVILLLLYFLLLMMM-L-LLLVLLAAGGGGGGGGGGGGGGGGGGGGGGGGGGGGGGGGGGGGGGGGGGGGGGGGGGGGGGGGGGGGGGGGGGGGGGG
524	0.42925	AAAATSNTTTTASAAAAAA-F-STTATTAAAAAAAAAAAAAAAAAAAAAAAAAAAAAAAAAAAAAAAAAAAAAAAAAAAAAAAAAAAAAAAAAAAAAAAII
525	0.36185	EEEEYLLNNSNNNQRTYYH-N-SSSSSSSSTTSSSSSSSSSSSSSSSSSSSSSSSSSSSSSSSSSSSSSSSSSSSSSSSSSSSSSSSSSSSTTTTTTSSSS
526	0.35835	EEEELMTPPATPGGGGAGG-N-LTNNNNNNAANNNNNNNNNNNNNNNNNNNNNNNNNNNNNNNNNNNNNNNNNNNNNNNNNNNNNNNNNNNNNNNNNNNNN
527	0.23797	----S--------GAAAAA----------------------------------------------------------------------------------
528	0.30353	AATTNGGGGGGTVRRPRRRLKHSGVVVVHHHHQQQQHHHHHHHHHHHHQQQQQQQQHHQQHHHHHHHHHHQQQQQQQQQQQQQQQQQQQQQHHHHHHQQQQ
529	0.34382	VVVVVFFQQFVSSLLLLLLADSVCGVAAFFLLFFFFFFFFFFFFFFFFFFFFFFFFFFFFFFFFFFFFFFFFFFFFFFFFFFFFFFFFFFFFFFFFFFFFF
530	0.34477	AAAANTLDDGDDNNNNNNNPSEQDEEEEEEEEEEEEEEEEEEEEEEEEEEEEEEEEEEEEEEEEEEEEEEEEEEEEEEEEEEEEEEEEEEEEEEEEEEEEE
531	0.29354	RRRRAPPYFVIIHHHHHHHKISVRAGSSGGTTASAAAAAAAAAAAAAAAAAAAAAAGAAAAAAAAAAAAAAAAAAAAAAAAAAAAAAAAAASSSSSSAAAS
532	0.33627	GGGGPYYFFLLLMLLLLLLFLMAGYGGGGGGGACGGGGGGGGGGGGGGGGGGGGGGGGGGGGGGGGGGGGGGGGGGGGGGGGGGGGGGGGGCCCCAACCCC
533	0.32695	GGGGTSSAAGGAFTTITTTAGACAGAGGGGGGGGGGGGGGGGGGGGGGGGGGGGGGGGGGGGGGGGGGGGGGGGGGGGGGGGGGGGGGGGGAAAAAAAAAA
534	0.17891	----P------------------------------------------------------------------------------------------------
535	0.19456	----I------------------------------------------------------------------------------------------------
536	0.20494	----R------------------------------------------------------------------------------------------------
537	0.45938	FFFFSSSFFWWWNWFWWWWFKYFFFFFFFFFFFFFFFFFFFFFFFFFFFFFFFFFFFFFFFFFFFFFFFFFFFFFFFFFFFFFFFFFFFFFFFFFFFFFFF
538	0.39364	HHHHLLLEEEEELVVVVVVLIMVVVWVVVVIIIIIIIIIIIIIIIIIIIIIIIIIIIIIIIIIIIIIIIIIIIIIIIIIIIIIIIIIIIIIIIIIVVLLLL
539	0.45976	NNNNVSVKKKKKRRRRRRRSQRRRRYKKRRRRRRRRRRRRRRRRRRRRRRRRRRRRRRRRRRRRRRRRRRRRRRRRRRRRRRRRRRRRRRRRRRRRRRRRR
540	0.42467	TTVVTTTHHLVILLLLLLLYAASTSSSSSSSSTSTTTTTTTTTTTTTTSSSTTTSSSSSSSSSSSSSSSSSSSTTTTSTTSSSSTTTTSSSSSSSSSSSSS
541	0.32405	TTTTEESQAPPPNPPSPLPERGDARDSSNNQRNRRRRRRRRRRRRRRRSSSRRRDDRSRRRRRRRRRRRRSSSRRRRRRRRRRRRRRRRRRRRRRKKAAAA
542	0.38233	AAAADTDPENEEEDDDDDDDADD-PPPPEDPPDDDDDDDDDDDDDDDDEDDEEEATEEAAEEEEEEEEEEEEEPPPPPEPDDDDEEEPEDDAAAEAAPPPP
543	0.22481	LLLLQQDGESQPTDDDDDDAK-K------------------------------------------------------------------------------
544	0.19956	----YVIMGTLKDKKKKKKTQ-T------------------------------------------------------------------------------
545	0.19906	----KDDLPLRRPLLLLLLAI-F------------------------------------------------------------------------------
546	0.17067	----TADKGSGSEDNSSNNNA-A------------------------------------------------------------------------------
547	0.16442	----MTTESDNAVGGGGGGTD-H------------------------------------------------------------------------------
548	0.17286	----RMISLSFWQLQSSSSAS-P------------------------------------------------------------------------------
549	0.16948	----AAGTSTSLQDDDDDDY--Q------------------------------------------------------------------------------
550	0.15521	----ARDAKNTSMPPPPPPA--L------------------------------------------------------------------------------
551	0.17484	----LIIAEEENLSSSSSSS--P------------------------------------------------------------------------------
552	0.16063	----DFLDTATTKSSSSSSI--M------------------------------------------------------------------------------
553	0.14676	----TDSIALETQ------L--H------------------------------------------------------------------------------
554	0.17816	----YALDAADRY------D--D------------------------------------------------------------------------------
555	0.14423	----LPKADTARG------D--G------------------------------------------------------------------------------
556	0.16519	----ASIAIFLAD------A--A------------------------------------------------------------------------------
557	0.13352	----SVLFD-ALP------Q--K------------------------------------------------------------------------------
558	0.15827	----QSS-A-SAS------A--K------------------------------------------------------------------------------
559	0.12665	----TGG-N-LQS------R--Y------------------------------------------------------------------------------
560	0.11214	------S-F--Y-------D--Q------------------------------------------------------------------------------
561	0.10455	------P------------P--V------------------------------------------------------------------------------
562	0.09991	-----RQ------------A--K------------------------------------------------------------------------------
563	0.10205	-----LS------------D--D------------------------------------------------------------------------------
564	0.1241	-----SP------------S--C------------------------------------------------------------------------------
565	0.12195	-----QN------------L-FC------------------------------------------------------------------------------
566	0.14361	-----QQ------------P-SS------------------------------------------------------------------------------
567	0.24202	LLKKLNNPPPPPSGGGGGGGHAGGESEDDDGGQDDDDDDDDDDDDDDDKEEEEEEEEAEEEEEEEEEEEEAAAEEEEEEEAAAAAAAEEEEGGGGGGGGGG
568	0.15617	IIVVTAGDASEADEKKHKKDNGPQLSRRVVVVEEDDDDDDDDDDDDDDFFFFFFFFFFFFFFFFFFFFFFFFFFFFFFFFFFFFFFFFFFFLLLLVVLLVV
569	0.2148	QQQQPSPDDDDDKNNDDNDIVGTAKGDDDDPPEEPLLPPPPPPPLPPPAEKDDDDDASAAAAAAAAAAAAEEEKKKKDEETTTTEEEAAATKKKKEEKKKK
570	0.29126	YYYYLYFWWWWWASSSSSSHSQALLVRRYYHHWWWWWWWWWWWWWWWWWWWWWWWWWWWWWWWWWWWWWWWWWWWWWWWWWWWWWWWWWWWWWWSYYQQQQ
571	0.1192	-----QQ----------------------------------------------------------------------------------------------
572	0.11507	-----RR----------------------------------------------------------------------------------------------
573	0.09955	-----RW----------------------------------------------------------------------------------------------
574	0.07028	-----QQ----------------------------------------------------------------------------------------------
575	0.0654	-----QR----------------------------------------------------------------------------------------------
576	0.06671	-----EE----------------------------------------------------------------------------------------------
577	0.06521	-----AA----------------------------------------------------------------------------------------------
578	0.06172	-----VI----------------------------------------------------------------------------------------------
579	0.06584	-----AA----------------------------------------------------------------------------------------------
580	0.06544	-----AA----------------------------------------------------------------------------------------------
581	0.06704	-----RR----------------------------------------------------------------------------------------------
582	0.06918	-----MM----------------------------------------------------------------------------------------------
583	0.06476	-----QK----------------------------------------------------------------------------------------------
584	0.0644	-----NS----------------------------------------------------------------------------------------------
585	0.11419	-----RL----------------------------------------------------------------------------------------------
586	0.15565	-----WN----------------------------------------------------------------------------------------------
587	0.19434	-----SS----------------------------------------------------------------------------------------------
588	0.49074	EEEEQAAPPPPPPPPPPPPPPPPPPPPPPPPPPPPPPPPPPPPPPPPPPPPPPPPPPPPPPPPPPPPPPPPPPPPPPPPPPPPPPPPPPPPPPPPPPPPPP
589	0.44918	NNNNIDDTTTEEHHHHHHHTAEDDDDNNNNDDNNNNNNNNNNNNNNNNNNNNNNNNNNNNNNNNNNNNNNNNNNNNNNNNNNNNNNNNNNNNNNNDDDDDD
590	0.48613	YYYYVILFYILIIIIIIIIVVIILLLLLLLIILLIIIIIIIIIIIIIIIIIIIILLIIIIIIIIIIIIIIIIIIIIIIIIIIIIIIIIIIIIIIIIIIIII
591	0.49755	RRRRQQQSSEEETEEEEEELKVEQEQQQMMQQQQQQQQQQQQQQQQQQQQQQQQQQQQQQQQQQQQQQQQQQQQQQQQQQQQQQQQQQQQQQQQQQQQQQQ
592	0.44355	DDNNYFFYFYYFLFFFFFFAQVLVLFFFFFFFYYYYYYYYYYYYYYYYFYYYYYYYYYYYYYYYYYYYYYYYYYYYYYYYYYYYFFFFYYYYYYFYYYYYY
593	0.37013	WWWWNIVIIL-LQQQQQQQGGGFRIHHHHHHHHHHHHHHHHHHHHHHHHHHHHHHHHHHHHHHHHHHHHHHHHHHHHHHHHHHHHHHHHHHHHHHHHHHHH
594	0.34691	IILLLGCAAS-TFFFFFFFYQCFFFFFFFFFFFFFFFFFFFFFFFFFFFFFFFFFFFFFFFFFFFFFFFFFFFFFFFFFFFFFFFFFFFFFFFFFFFFFFF
595	0.16309	-------------GASRMR-SG-------------------------------------------------------------------------------
596	0.1393	-------------QQKQQQ-KV-------------------------------------------------------------------------------
597	0.10769	-------------IIIIII-A--------------------------------------------------------------------------------
598	0.10998	-------------STSSSS-Y--------------------------------------------------------------------------------
599	0.15109	-------------HPHHHH-N--------------------------------------------------------------------------------
600	0.15173	-------------QQRQQQ-A--------------------------------------------------------------------------------
601	0.32136	VVLLVTTLLILMVLVILLLALAAVALLLLLLLLLLLLLLLLLLLLLLLLLLLLLLLLLLLLLLLLLLLLLLLLLLLLLLLLLLLLLLLLLLLLLLLLLLLL
602	0.36804	NNDDKPPDDDPGEPPPPPPVAPPPPAPPPPPPPPPPPPPPPPPPPPPPPPPPPPPPPPPPPPPPPPPPPPPPPPPPPPPPPPPPPPPPPPPPPPPPPPPPP
603	0.23053	-------DD----PTPP-PQ-I-G-----------------------------------------------------------------------------
604	0.24612	HHEEQAATTGVGGSLAAPARDVFMAETTIISSIIVVVVVVVVVVVVVVVVVVVVVVVVVVVVVVVVVVVVVVVVVVVVVVVVVVVVVVVVVAAAAVVVVVV
605	0.2813	NNDDFYNFFYYFGGGNDADQTSLAPAYYAAQQAAAAAAAAAAAAAAAAAAAAAAAAAAAAAAAAAAAAAAAAAAAAAAAAAAAAAAAAAAAAAAAAAAAAA
606	0.26702	VVVVLFFVVLGFLLVVVDVIIEALFGLLVVVVIIIIIIIIIIIIIIIIIIIIIIIIIIIIIIIIIIIIIIIIIIIIIIIIIIIIIIIIIIIMMMMIIIIII
607	0.1569	-----N-----------------------------------------------------------------------------------------------
608	0.2176	-----TDPP----TPPP------------------------------------------------------------------------------------
609	0.2468	AAAA-ATQQNYGGRKNNAPMFSPD-AKKRRIISSNNNNNNNNNNNNNNNNNNNNNNNNNNNNNNNNNNNNNNNNNNNNNNNNNNNNNNNNNRRRRRRSSRS
610	0.33383	YYFFDAAYFGFYSFQQQPNFPFPPYEDDYYDDYYYYYYYYYYYYYYYYYYYYYYYYYYYYYYYYYYYYYYYYYYYYYYYYYYYYYYYYYYYYYYYYYYYYY
611	0.31002	SSAAGGNDNWGQGSAVVNQNSTLDDAHHDDHHNNNNNNNNNNNNNNNNNNNNNNNNNNNNNNNNNNNNNNNNNNNNNNNNNNNNNNNNNNNDDDDDDDDDD
612	0.33816	EEEEGYGGGHDNNFPAQQVEKAGGEGGGGGGGGGGGGGGGGGGGGGGGGGGGGGGGGGGGGGGGGGGGGGGGGGGGGGGGGGGGGGGGGGGGGGGGGGGGG
613	0.26707	LLLLKAYKKSQNSYLLLVQFVPMVAVRRTTRRKKSSSSSSSSSSSSSSSSSSSSSSSSSSSSSSSSSSSSTTTSSSSSSSSSSSSSSSSSSQQQRKKKKKK
614	0.23944	FFFFVSGNNANYIRPPPKLRSAKSLTKKKKVKSSNNNNNNNNNNNNNNNNNNNNNNNNNNNNNNNNNNNNKKKNNNNNNNNNNNKKKNNNNAAAAAAAAAA
615	0.21798	LLMMACNY-ANVSHASDLPDPPYTVSIIAAPPAAAAAAAAAAAAAAAAAAAAAAPPAAAAAAAAAAAAAAGGGGGGGGGGAAAAGGGAAAAAAAAAAAAAA
616	0.18316	#NAME?
617	0.14813	----SKA--QMD-----DPG---VPP---------------------------------------------------------------------------
618	0.14506	----SIR---V------------R-----------------------------------------------------------------------------
619	0.13849	----LML---T------------F-----------------------------------------------------------------------------
620	0.12185	----LSS----------------A-----------------------------------------------------------------------------
621	0.11713	----VGP----------------K-----------------------------------------------------------------------------
622	0.12808	----VPG----------------F-----------------------------------------------------------------------------
623	0.12025	----APS----------------------------------------------------------------------------------------------
624	0.1178	----SVP--A-N-----P-L-----K---------------------------------------------------------------------------
625	0.17626	DTTTGGA--TPPESNDDDDAENPQAGVGAAQQQQRKEEEEEEEEEEEEEKKKKKKKEKKKKKKKKKKKKKQQQKKKKKKKKKKKQQQNKKKDDDDQQKKNK
626	0.15975	TAEEGYG--GNSNPSSSSSVIAFSGAGGAAQQAAMMMMMMMMMMMMMMVEEEEEAAAEEEEEEEEEEEEEEEEEEEEEEEEEEEEEEEEEEGGGGSSSSTS
627	0.07845	----L------------------------------------------------------------------------------------------------
628	0.07503	----V------------------------------------------------------------------------------------------------
629	0.05812	----S------------------------------------------------------------------------------------------------
630	0.04284	----T------------------------------------------------------------------------------------------------
631	0.04348	----P------------------------------------------------------------------------------------------------
632	0.04227	----A------------------------------------------------------------------------------------------------
633	0.04207	----A------------------------------------------------------------------------------------------------
634	0.06193	----G------------------------------------------------------------------------------------------------
635	0.09612	----Q------------------------------------------------------------------------------------------------
636	0.09371	----G------------------------------------------------------------------------------------------------
637	0.19531	AGGGY----NDD-IYIIIIGLYPQHSYYHHEEHHHHHHHHHHHHHHHHHHHHHHHHHHHHHHHHHHHHHHHHHHHHHHHHHHHHHHHHHHHHHHHHHHHHH
638	0.28517	GVKK----YGGG--RGGGGGGSGGGGGGGGAAGGGGGGGGGGGGGGGGGGGGGGSSGGGGGGGGGGGGGGGGGGGGGGGGGGGGGGGGGGGGGGGGGGGGG
639	0.14951	-A-I----------LVV------------------------------------------------------------------------------------
640	0.16267	-S-N----------LVV------------------------------------------------------------------------------------
641	0.29642	VFIF-SYFFQFYF-LILAVMNFLL-IYYYYYYFFFFFFFFFFFFFFFFFFFFFFFFFFFFFFFFFFFFFFFFFFFFFFFFFFFFFFFFFFFFFFFFFFFFF
642	0.26048	ADND--NSSQNNV-QQQVVSVLTK-TTTQQQQQQQQQQQQQQQQQQQQQQQQQQQQQQQQQQQQQQQQQQQQQQQQQQQQQQQQQQQQQQQQQQQQQQQQQ
643	0.18931	------A--WYY-----L-WM--W-----------------------------------------------------------------------------
644	0.17212	------C--GLA-----L-DF--P-----------------------------------------------------------------------------
645	0.16839	------Y--TTS-------TG--S-----------------------------------------------------------------------------
646	0.14707	------S------------DS--G-----------------------------------------------------------------------------
647	0.18514	----IA-------------AI--I-----------------------------------------------------------------------------
648	0.17696	S---SC-------------NS--T-----------------------------------------------------------------------------
649	0.23414	F-F-VYLMMIILVPLFFLLVI-SMVLLLVVVVAAAAAAAAAAAAAAAAAAAAAAMMCCCCCCCCCCCCCCAAAAAAAAAAAAAAAAAAAAAVVVVAAAVVV
650	0.2871	D-D-VSVSSAAATPASSAQQQ-GQVNHHHHHHHHHHHHHHHHHHHHHHHHHHHHHHHHHHHHHHHHHHHHHHHHHHHHHHHHHHHHHHHHHHHHHHHHHHH
651	0.15777	-----I------------F----------------------------------------------------------------------------------
652	0.16959	-----V------------S----------------------------------------------------------------------------------
653	0.34581	VVLLSVVAAVAV-LVVVVVVAFMLFSIIVVVVVVVVVVVVVVVVVVVVVVVVVVVVVVVVVVVVVVVVVVVVVMMMMMMMVVVVMMMVVVVVVVVVVVVVV
654	0.29649	WWWWSSSAAAAS-IVVVVVFAGLIGYCCGGGGGGGGGGGGGGGGGGGGGGGGGGGGGGGGGGGGGGGGGGGGGGGGGGGGGGGGGGGGGGGGGGGGGGGGG
655	0.29076	DDDDPNQLLLVL-NNNNNNNLVLAPVDDPPPTSSSSSSSSSSSSSSSSSSSSSSSSSSSSSSSSSSSSSSSSSSSSSSSSSSSSSSSSSSSPPPPPPYYYY
656	0.34489	LLLLAMMMMVVC-LLLLLLVQTLCILLLMMMMMMMMMMMMMMMMMMMMMMMMMMMMMMMMMMMMMMMMMMMMMMMMMMMMMMMMMMMMMMMNNNNMMNNNN
657	0.33326	LLIIHYYTTAST-YYNYYYKHHKRLRLLYYRRRRRRRRRRRRRRRRRRRRRRRRRRRRRRRRRRRRRRRRRRRRRRRRRRRRRRRRRRRRRKKKKRRLLLL
658	0.18011	------------------------V----------------------------------------------------------------------------
659	0.21727	------------------------A----------------------------------------------------------------------------
660	0.50105	PPPPPPPPTPPPPTSSSSSPPPPPPPPPSSGASSSSSSSSSSSSSSSSSSSTTTSSSSSSSSSSSSSSSSSSSSSSSSSSSSSSSSSSSSSPPPPSSSSSS
661	0.37331	FFFFLLLFFLLRLVIIIVIFLTAQQKKKNNTTMEPPPPPPPPPPPPPPPPPPPPPPPPPPPPPPPPPPPPPPPPPPPPPPPPPPPPPPPLLQEEEKKKKKK
662	0.61525	TTTTSSSSSSSSSSSSSSSSSSSSSSSSSSSSSSSSSSSSSSSSSSSSSSSSSSSSSSSSSSSSSSSSSSSSSAAAASSSSSSSSSSSSSSSSSSSSSSSS
663	0.62115	RRRRRRRRRRRRRRRRLHPRRRYTRRRRRRVVRRRRRRCRRRRRRRRRRRRRRRRRRRRRRRRRRRRRRRRRRRRRRRRRRRRRRRRRRRRRRRRRRRRRR
664	0.65561	GGGGGGGGGGGGGGGGGGGGGGGGGGGGGGGGGGGGGGGGGGGGGGGGGGGGGGGGGGGGGGGGGGGGGGGGGGGGGGGGGGGGGGGGGGGGGGGGGGGGG
665	0.54276	YYSSNSSTYNTNSSSSSSSYSETSQTRRHHWWRRRRRRRRRRRRRRRRRHRRRRRRHHHHHHHHHHHHHHRRRRRRRRRRRRRRRRRRRRRRRRSSSNSSD
666	0.59148	VVVVVVVVVVVVVIIVVIVVIIVVIVIILLLLIIVVVVVVVVVVVVVVIIIVVVIIVVVVVVVVVVVVVVVVVIIIIVVVIIIIIIIIVVVIVVVVVVVVV
667	0.45466	HHHHHHHTSTDSTSSSTIIYKRKGTRGGKKKKRRKKKKKKKKKKKKKKKKKHHHHHRHRRRRRRRRRRRRHQQQQQQQQQQQQQHHHQQQQWEEETTTTTT
668	0.5036	IIIIIVSIIIIILLLLLLLIIILLLLLLIILLLLLLLLLLLLLLLLLLILLAAAVVIILLIIIIIIIIIIVVVAAVALLVVVVVLLLLVVVIIIVLLLLLL
669	0.46774	LLLLNRTNNSAANSSNNNNNTTAKRRKKKKRRTTTTKKKKRRRRRRRRTKKRKKRRKKKKKKKKKKKKKKKKKKKKKKKKKKKKKKKKKRRTVVVRRRRRR
670	0.55182	DDSSTTSSSSSSTNDDNDDQSGSSSSSSSSSSSSSSSSSSSSSSSSSSSSSSSSSSSSSSSSSSSSSSSSSSSSSSSSSSSSSSSSSSSSSSSSSSSSSAS
671	0.47579	KKSSTSSNTSNATNNNNNNTKDRAAAAAKKATRKRRRRRRRRRRRRRRRKKRRRKKRRRRRRRRRRRRRRKKKKKKKKKKKKKKRRRKKKKAAAAAAAPSS
672	0.59307	DDDDDNNDDDDDDDNNDDDDDANDDDNNDDNNDDDDDDDDDDDDDDDDDDDDDDDDDDDDDDDDADDDDDDDDDDDDNDDDDDDDDDDDDDDNNNNNDDDD
673	0.5891	PPPPPPPTTMTAPPPPPPPPPPAPPPPPPPPPPPPPPPPPPPPPPPPPPPPPPPPPPPPPPPPPPPPPPPPPPPPPPPPPPPPPPPPPPAAPPPPPPPPPP
674	0.42244	YYYYLMLALDEASFFFFFFLFDWFHRMLFFQQKHNNNHHHNNNNNNNNHFFRRRRRHRHHHHHHHHHHHHRRRRRRRRRRRRRRRRRRRRRHLSNRRHKKK
675	0.4186	LLLLADDNDDVVGSTSAAAAASDAAVDQVEDDAAAAAAAADAAADDDDQEAQQQEEQEAAQQQQQQQQQQEEEQQQQDQQQQQQQQQQQEEQDDDEEDAAA
676	0.45144	HHWWYAAPNPNPPHYHDNNNYPYPKNDPKKHHAAHHHHHHHHHHHHHHHHHHHHHHHHHHHHHHHHHHHHYYYHHHHYHHHHHHHHHHHHHKKKKKKDDDD
677	0.55044	HHQQPPPPPPPPPPPPPPPPPLPPPPPPPPPPPPPPPPPPPPPPPPPPPPPPPPPPPPPPPPPPPPPPPPPPPPPPPPPPPPPPPPPPPPPPPPPPPPPPP
678	0.27059	FFFF-------------------------------------------------------------------------------------------------
679	0.38084	AAAALAEIIVILVLLLIMMVKILKVMLLDEVMSSGSSSSSSSSSSSSSSSSSSSSSAAAAAAAAAGAGAASSSSSSSSSSSSSSSSSSSSSNKKKVVVVVV
680	0.49988	YYNNIIIVVFIIVIIIIIIIIIILIVIIFFIIIIIIIIIIIIIIIIIIIIIIIIIIIIIIIIIIIIIIIIIIIIIIIIIIIIIIIIIIIIIIIIIIIILII
681	0.45634	DDDDDDDDDDDNDDDDDDDDNDDSEDDDVVQNLLLLLLLLLLLLLLLLLLLLLLLLLLLLLLLLLLLLLLLLLLLLLLLLLLLLLLLLLLLEQQEKKRRRR
682	0.55261	PPPPSPPPPLPPALLLLLLFPPPPPPPPFFPPFFFFFFFFFFFFFFFFFFFFFFFFFFFFFFFFFFFFFFFFFFFFFFFFFFFFFFFFFFFFFFFFFFFFF
683	0.53804	QQKKAGGQKGRNGNNNNNNRNRNGRNNNNNNNNNNNNNNNNNNNNNNNNNNNNNNNNNNNNNNNNNNNNNNNNNNNNNNNNNNNNNNNNNNNNNNNNNNNN
684	0.59499	YYFFFFFWWFWWIMMMMMMTYYYYYFYYYYYYYYYYYYYYYYYYYYYYYYYYYYYYYYYYYYYYYYYYYYYYYYYYYYYYYYYYYYYYYYYYYYYYYYYYY
685	0.52384	FFFFLLLLLLFLLFFLFFFAFLLLLLLLLLLLMMMMMMMMMMMMMMMMMMMQQQMMMMMMMMMMMMMMMMMMMMMMMMMMMMMMMMMMMMMILLIMMMMMM
686	0.4292	LLLLTSSASTATTGKGGGGSAQSTSGSSSSSSSAAAAAAAAAAAAAAASSSSSSSSSSSSSSSSSSSSSSAASSSSSAAASSSSSSSSASSSSSSSSSSSS
687	0.46413	NNNNNHHDDHHDSEEEDDDDETHDDDDDTTTTHKDDEEEEEEEEEEEETTTTTTHHHTHHHHHHHHHHHHSSSTTTTTTTNSSSHHHHTTTTTTTHHHHHH
688	0.22634	-----------------------KL----------------------------------------------------------------------------
689	0.25015	-----------------------DG----------------------------------------------------------------------------
690	0.42352	EEEEPPPPPPPPPEDEQQQPNQEGGPPHEEEEDEPPAAAAAAAAAAAAEEEDDDEDEGEEEEEEEEEEEEDEEEEEEEEEEEEEEEEEEEEEEEEEEPPPP
691	0.26172	LLFFWVARRAGVFIIQKKKTLNSAVAEEEETTKKLLLLLLLLLLLLLLQQQQQQQQQQQQQQQQQQQQQQQQQQQQQQQQQQQQQQQQQQQQRRQDDEEEE
692	0.56564	DDDDDDDDDDDDDDDDDDDDDDDDDDDDDDDDDDDDDDDDDDDDDDDDDDDDDDDDDDDDDDDDDDDDDDDDDDDDDDDDDDDDDDDDDDDDDDDDDDDDD
693	0.38201	LLLLAVVQQRIVVPIIIIIFLRILRLIIKKIVWWWWWWWWWWWWWWWWWWWWWWWWWWWWWWWWWWWWWWWWWWWWWWWWWWWWWWWWWWWKRRKWWWWWW
694	0.37743	LLLLQDDEEEQEFAAAAAAQVNAAAEKKRREEQERRRRRRRRRRRRRRQQRQQQRRQQQQQQQQQQQQQQQQQQQQQQQQHHHHQQQQQQQQQQQAAEEEE
695	0.3621	GGGGAVVMMIVLVIIIIIILLLLTATTTEEDDEEEEEEEEEEEEEEEEEEEEEEEEEEEEEEEEEEEEEEEEEEEEEEEEEEEEEEEEEEEDDDDDDKKKK
696	0.38396	QQQQTLIAAAAALLLLLLLHLFSLMSMMWWFFFFFFFFFFFFFFFFFFFFFFFFFFFFFFFFFFFFFFFFFFFFFFFFFFFFFFFFFFFFFWWWWFFFFFF
697	0.45321	AAAAIAAVVVVVERRRRRRIRRIRMAIIVVRRRRRRRRRRRRRRRRRRRRRRRRRRRRRRRRRRRRRRRRRRRRRRRRRRRRRRRRRRRRRRRRRRRRRRR
698	0.43657	AAAANAAAAAAAQEEEEEEAEAMKAEAAEELQDDDDDDDDDDDDDDDDAADDDDAADDDDDDDDDDDDDDDDDDDDDDDDDDDDDDDDDDDDDDDHHHHHH
699	0.48614	AAAAVGGAAAGAGGGGGGGLGAGGGGGGAACCAAGGAAAAAAAAAAAAAAAAAAAAAAAAAAAAAAAAAAGGGGGGGGGGAAAAGGGAAAACCCCCCCCCC
700	0.46727	TTSSMIIFFMFFIIIVVVVLFLMILVIIIIVVIIIIIIIIIIIIIIIIIIIIIIIIIIIIIIIIIIIIIIIIIIIIIIIIIIIIIIIIIIIIIIIVVVVVV
701	0.50733	QQKKKVQRRRRKLRRHRRRHKGRHRRKKKKKKRRRRRRRRRRRRRRRRRRRRRRRRRRRRRRRRRRRRRRRRRRRRRRRRRRRRRRRRRRRRRRRRRRRRR
702	0.43264	LLLLFFFRRRRRASSSSSSKLALWILIIVVLLILIIAAAAAAAAAAAAIIIIIIIIIIIIIIIIIITIIILLLLLLLLLLIIIILLLIIIILLLLLLLLLL
703	0.45111	AAAAVAACCISAAAAAAAAQIALACSGGAATTTTTTTTTTTTTTTTTTTTTTTTTTTTTTTTTTTTTTTTTTTTTTTTTTTTTTTTTTTTTTTTTTTTTTT
704	0.55563	RRRRRDDRRRRRRRGRRRRRRRARAYRRRRRRRRRRRRRRRRRRRRRRRRRRRRRRRRRRRRRRRRRRRRRRRRRRRRRRRRRRRRRRRRRRRRRRRRRRR
705	0.47066	NNDDRRREQQADKRRRRRREEERDREAANNEEEEEEEEEEEEEEEEEEEEEEEEEEQEEEEEEEEEEEEEEEEEEEEEEEEEEEEEEEEEEEEEEEEEEEE
706	0.48231	IILLWVVIFALFFMMMMMMLMIIVIMIIIIIIIIIIIIIIIIIIIIIIIIIIIIIIIIIIIIIIIIIIIIIIIIIIIIIIIIIIIIIIIIIIIIIIIIIII
707	0.41881	SSTTVFLVTFMFLLFLFFFFSGAAAFFLLLFFIIMMMMMMMMMMMMMMMMMIIIFFIIMMMMMMMMMMMMMMMMMMMMMMIIIIMMMMMMMLLLLFFFFFF
708	0.42037	NNSSARSAQAAGSSSSSSSNQHRRQSDQGKAAEARRHRRRRRRRRRRRAHHAAAAANNNNHHHHHHHHHHQQQAAAAQQQAAAANNNAAAAAAANGGGGGG
709	0.47572	SSQQKSSSHASTASSSSSSAQRTSAQAAQQQQQQQQQQQQQQQQQQQQQQQQQQQQQQQQQQQQQQQQQQQQQQQQQQQQQQQQQQQQQQQQQQQQQQQQQ
710	0.39635	GGGGSTEDEIPSSQKEQQPPSPKSRPPPKKEEPPPPPPPPPPPPPPPPPPPPPPPPPPPPPPPPPPPPPPPPPPPPPPPPPPPPPPPPPPPPPPPAAKKKK
711	0.42617	AAAADLAVISAAAAAAAAASPEPAPSSSAAAATAAAAAAAAAAAAAAAAAAAAAAAAAAAAAAAAAAAAAAAAAAAAAAAAAAAAAAAAAAAAAAAAAAAA
712	0.45079	MMMMILLMLEMLWFFFFFFLLLFLLLMMLLLFMFLLLLLLLLLLLLLLLLLLLLLLLLLLLLLLLLLLLLLLLLLLLLLLLLLLLLLLLLLMMMMFFFFFF
713	0.32886	QQKKINRRQIAKDKKKKKKAKAASREAADDAADDDDDDDDDDDDDDDDDDDDDDAADDDDDDDDDDDDDDDDDDDDDDDDDDDDDDDDDDDDDDDDDDDDD
714	0.2744	TTEEEGGEDTGPNGNPNDDADEDEDKKKPPPPERRRRRRRRRRRRRRRPPPPPAPPKKKKQQQQQQQQQQPPPAPPPPPAPPPPPPPSEKKDEEAPPDAQL
715	0.12889	----------------------S------------------------------------------------------------------------------
716	0.08365	----------------------L------------------------------------------------------------------------------
717	0.057	----------------------D------------------------------------------------------------------------------
718	0.0333	----------------------L------------------------------------------------------------------------------
719	0.03499	----------------------P------------------------------------------------------------------------------
720	0.03466	----------------------E------------------------------------------------------------------------------
721	0.03492	----------------------D------------------------------------------------------------------------------
722	0.0349	----------------------S------------------------------------------------------------------------------
723	0.03507	----------------------D------------------------------------------------------------------------------
724	0.03507	----------------------D------------------------------------------------------------------------------
725	0.04214	----------------------K------------------------------------------------------------------------------
726	0.07179	----------------------T------------------------------------------------------------------------------
727	0.09286	----------------------S------------------------------------------------------------------------------
728	0.15895	-------VV-IV----------V------------------------------------------------------------------------------
729	0.29152	YYYY-KKVI-TLYFSFVVVLVWFYLHHHYFFFYYYYFFFFYYYYYYYYYYYYYYYYFYYYYYYYYYYYYYYYYFYYYYFFYYYYYYYYYYYYFFFYYFYYY
730	0.29051	FFFF-VVADILIIVVVVVIGIRWLLIFFNNRRRRRRRRRRRRRRRRRRRRRRRRSSRRRRRRRRHRRRRRRRRRRRRRRRRRRRRRRRRRRRRRRRRRRRR
731	0.36067	AAAA-RGGGGGGIGNNHNNPDDPDGRKKGGGGGGGGGGGGGGGGGGGGGGGGGGGGGGGGGGGGGGGGGGGGGGGGGGGGGGGGGGGGGGGGGGGGGGGGG
732	0.30868	GGGG-RRPEDGDAEKGEGGTFHTGSKRHGGKKRRRRRRRRRRRRRRRREEDRRRRRRRRRRRRRRRRRRRRRRRRRRRRRRRRRRRRRRRREEEEAAPPPP
733	0.37707	EEEE-RREEEEEPTFSTTTEEEDEITEEEEEEEEEEEEEEEEEEEEEEEEEEEEEEEEEEEEEEEEEEEEEEEEEEEEEEEEEEEEEEEEEEEEEEEEEEE
734	0.29043	TTTT-VVILVSYAVVVVVVVTICLACIVIILLIILLLLLLLLLLLLLLIIIIIIIIIIIIIIIIIIIIIIIIIIIIIIIIIIIILLLIIIIIIIIIIIIII
735	0.11751	------------S----------------------------------------------------------------------------------------
736	0.09717	------------G----------------------------------------------------------------------------------------
737	0.05824	------------L----------------------------------------------------------------------------------------
738	0.05462	------------D----------------------------------------------------------------------------------------
739	0.13215	------V-----A----------------------------------------------------------------------------------------
740	0.13687	------P-----G------------F---------------------------------------------------------------------------
741	0.24344	IILLSSPLLVYFIFYHYYYVVLNFRFVVSSQQSSNNNNNNNNNNNNNNSSSSSSSSSSSSSSSSSSSSSSSSSSSSSSSSSSSSSSSSSSSQQQQQQQQQQ
742	0.51009	PPPPPPPPPPPPPPPPPPPPPPPPPSPPPPPPPPPPPPPPPPPPPPPPPPPPPPPPPPPPPPPPPPPPPPPPPPPPPPPPPPPPPPPPPPPPPPPPPPPPP
743	0.185	-----P-----------------------------------------------------------------------------------------------
744	0.20435	-----A-----------------------------------------------------------------------------------------------
745	0.43328	GGGGGGSGGGGGVPPPPPPGG--GRGGGGGGGGGGGGGGGGGGGGGGGGGGSSSGGGGGGGGGGGGGGGGGGGGGGGGGGGGGGGGGGGGGGGGGGGGGGG
746	0.24461	DDYYTLLPKATEDSAAAAAPDK-SNKPQPPSSPPAAAAAAAAAAAAAAKKKAAASSIIITTTVVVVVVVVIIIAAAAIIIAAAAVVVIPLLAIILAAEEEE
747	0.32582	NNNNPDDQKDDRGDDNGDDAKSDGSQAAEEHHNDEEDDDDDDDDDDDDDQHDDDAADTEEEEEEEEEEEEDDDHDDHDEENNNNNNSDEEADNNNHHNGRK
748	0.40072	LLLLPLLYYVVVSAAIVVVVVLTVTPVVVVIVVVLLLLLLCLCCCCCCILLCCCLLCCCCCCCCCCCCCCVVVVVVVVVVVVVVVVVCVVVIVVIVVIVVV
749	0.43235	AAVVQSQQQSQAVTTTTTTQQAVVETTKQQQQQQTTKKKKRKKKKKKKQSQKKKQQQQQQQQQQQQQQQQQQQQQQQQQQQQQQQQQQQQQTAATQQEQQR
750	0.45269	YYQEANDTTTTTNSSSSSSTTASSLMSTTTSSSSTTSSSSSSSSSTSSTTTTTTTTTTSSTTTTTTTTTTSSSTTTTTTTSNNNSSSSTTTSTTSTTTSTT
751	0.48434	DDNNAMRDDDDDTDDDDDDDNSDDDQDDDDDDDDDDDDDDDDDDDDDDDDDDDDDDDDDDDDDDDDDDDDDDDDDDDDDDDDDDDDDDDDDDDDDDDDDDD
752	0.46496	AAAADDDEDEDATEEEEEEEEQDDEMDDEEKKAEEENNNNKKKKKKKKETAAAAAAEEAAEEEEEEEEEEEEEEEEEEEEDDDDAAAAEEEEAAEDDEEEE
753	0.45302	DDTTEEQEEEEQADDDDDDDDDDQAYEEEEEEEEQQEEEEEEEEEEEEQQEEEEQQQQEEQQQQQQQQQQAAAEQQEQQQEEEEEEEEQEEAEEAEEQQEE
754	0.19453	------------------------T----------------------------------------------------------------------------
755	0.38954	LLLLWAVIVLIILLLLLLLIWILIL-IIIIIILLLLLLLLLLLLLLLLLLLLLLIILLLLLLLLLLLLLLLLLLLLLLLLLLLLLLLLLLLMIIIIIIIII
756	0.17842	----S------------------------------------------------------------------------------------------------
757	0.1854	----D------------------------------------------------------------------------------------------------
758	0.34798	SSSSDRRLLLVEEDDDDDDIEDEDERVIIIDDDDDDDDDDDDDDDDDDDDDDDDDDDDDDDDDDDDDDDDDDDDDDDDDDDDDDDDDDDDDDDDGDDDDDD
759	0.27186	AAQQQQDNGDEDSTAAAAAKNTAELDAEEEAAENSTATTTTATTAAAAADDAAAAAEAEEEEEEEEEEEEQQQKKKKKKKAAAAEEEAAEEAQQENNASAA
760	0.40619	WWWWWFFYYFWHYFFFFFFLWFWYAYDDWWFFFFFFFFFFFFFFFFFFFFFFFFFFFFFFFFFFFFFFFFFFFFFFFFFFFFFFFFFFFFFWWWWFFFFFF
761	0.21156	TTSSI------------------------------------------------------------------------------------------------
762	0.22227	EEDDA------------------------------------------------------------------------------------------------
763	0.23477	YYYYY------------------------------------------------------------------------------------------------
764	0.37833	IIVVLVVIIILVILLLLLLMIIAILAIIVVVVVVVVVVVVVVVVVVVVVVVVVVVVVVVVVVVVVVVVVVVVVIIIIIVIIIIIIIIIVIIVVVVIILLLL
765	0.42048	PPLLQRRAARRRRKRHRRRRRARRARRRKKRRRKRRRRRRRRRRRRRRRRRRRRRRRRRRRRRRRRRRRRRRRRRRRRRRRRRRRRRRRRRRKKKRRRRRR
766	0.33745	YYQQSNEEEEEKTTSTTTTESKLRTESRRRAAQQMMAAAAAASAAAAAENNASSEENDNNNNNNNNNNNNEEEEEEEEEEEEEENNNEETTQEEQEEEEEE
767	0.39116	HHNNVHHTTSASQSSTSSSIAAHSCHRRDDKKHHRRRRRRRRRRRRRRRHHRRRHHHHHHHHHHHHHHHHHHHHHHHHHHHHHHHHHHHHHNNNNHHHHHH
768	0.36417	FFFFLIISSISFATTTAAALAVGISGAAGGAAAAAAAAAAAAAAAAAAAAAAAAAAAAAAAAAAAAAAAAAAAAAAAAAAAAAAAAAAAAAVVVVVVLLLL
769	0.35325	RRRRGVVDDVNDTFFKVIEQGIQHHREEEEDDEEEEEEEEEEEEEEEEEEEEEEEEEEEEEEEEEEEEEEEEEEEEEEEEEEEEEEEEEEEEEEEEEEEEE
770	0.45222	PPPPTPTAAPTTASSSSSSPTTSSTTTTTTSSTTTTTTTTTTTTTTTTTTTTTTTTTTTTTTTTTTTTTTTTTTTTTTTTTTTTTTTTTTTSSSSSSSSSS
771	0.38071	NNNNAYYYYVVIGYYYYYYSEHTSLSIIAAAAAAAAAAAAAAAAAAAAAAAAAAAAAAAAAAAAAAAAAAAAAAAAAAAAAAAAAAAAAAAAAAAAAAAAA
772	0.47133	YYWWHHHYYYHFWVVLLWWNYHGNYYYYLLYYYYFFFFFFFFFFFFFFFYYYYYYYYFFFFFFFFFFFFFYYYFFFFFFFYYYYFFFFFFFYYYYFFYYYY
773	0.27566	-------------------G---------------------------------------------------------------------------------
774	0.59369	HHHHHHHAAHHHRHHHHHHHHHHAHHHHHHHHHHHHHHHHHHHHHHHHHHHHHHHHHHHHHHHHHHHHHHHHHHHHHHHHHHHHHHHHHHHHHHHHHHHHH
775	0.48872	GGAAPASGGVAAEGGGGGGQPPPIPPPPPPPPPPPPPPPPPPPPPPPPPPPPPPPPPPPPPPPPPPPPPPPPPPPPPPPPPPPPPPPPPPPPPPPPPPPPP
776	0.51339	VVVVVLLVVACSTVVVVVVCSSTTMTVVSSSSACSSSSSSSSSSSSSSCSSSSSSSCCCCCCCCCCCCCCSSSSSSSSSSSSSSSSSSSSSSSSSCCCCCC
777	0.64182	GGSSGGGGGGCCGGGGGGGCSGSGGCGGCCCCGGCCCCCCCCCCCCCCGCCCCCCCGGGGGGGGGGGGGGCCCCCCCCCCCCCCCCCCCCCCCCCGGGGGG
778	0.68086	TTSSTTTTTTTTTTTTTTTSTTSTTTTTSSTTSSSSSSSSSSSSSSSSSSSSSSSSTTTTTTTTTTTTTTSSSSSSSSSSSSSSSSSSSSSTSSSTTTTTT
779	0.67365	CCCCACCCACACALLLLLLACCACCCCCCCCCCCCCCCCCCCCCCCCCCCCCCCNNCCCCCCCCCCCCCCCCCCCCCCCCCCCCCCCCCCCCCCCCCCCCC
780	0.56697	SSSSAAAAAAGAKSSSSSSPARRKRKRRRRKKKRKKKKKKKKKKKKKKKKKAAAKKKKKKKKKKKKKKKKKKKKKKKKKKKKKKKKKKKKKKKKKKKRKKK
781	0.70336	MMMMMMMMMMMMMMMMMMMMMMMMMMMMMMMMMMMMMMMMMMMMMMMMMMMMMMMMMMMMMMMMMMMMMMMMMMMMMMMMMMMMMMMMMMMMMMMMMMMMM
782	0.52307	MMMMAGGGGGGGSSSSSSSMLGGGGGGGGGGGGGGGGGGGGGGGGGGGGGGGGGGGGGGGGGGGGGGGGGGGGGGGGGGGGGGGGGGGGGGGGGGGGGGGG
783	0.35229	#NAME?
784	0.33496	PPSSS--AKERRKQKQHQQPP-GA----AAPPA---------------------AA-----------------------------------DDDNVVRKKK
785	0.33364	KKRRQ--DDDDEGSGNSNNRRKSGSRKKSSSSDEYYYYYYYYYYYYYYNEETTTDDSYYYYYYYYYYYYYTTTTTTTTTTDDDDSSSEEEENDDDDDNDDD
786	0.4008	EEEEK--DDDNDAAAAAAAEGDPDDDDDDDDDDGDDDDDDDDDDDDDDDDDDDDDDDDDDDDDDDDDDDDDDDDDDDDDDDDDDDDDDDDDDDDDDDDDDD
787	0.40561	MMLLL--PPPPQRSSSSSSLDESSEDPPEEPPADDDDDDDDDDDDDDDEDEDDAPPEEEEEEEEEEEEEEEEEDDDDEDDKKKKDDDDEEDPPPPPPPPPP
788	0.46819	GGGGG--KKEDMWWWWWWWGGMTSAMAAMMTTMMMMMMMMMMMMMMMMMMMMMMMMMMMMMMMMMMMMMMMMMMMMMMMMMMMMMMMMMMMMMMMMMMMMM
789	0.55695	GGGGGQQAAASAGGGGGGGGGSSSSSSSSSAAAAAAAAAAAAAAAAAAAAAAAAAAAAAASSSSSAAAAAAAAAAAAAAAAAAAAAAAAASTAAAAAAAAA
790	0.66816	VVVVVVVVVVVVVVVVVVVVVVVVVVVVVVVVVVVVVVVVVVVVVVVVVVVVVVVVVVVVVVVVVVVVVVVVVVVVVVVVVVVVVVVVVVVVVVVVVVVVV
791	0.62951	VVVVVVVVLVVVVVVVVVVLVVVVVVVVVVVVVTVVVVVVVVVVVVVVVVVVVVVVVVVVVVVVVVVVVVVVVVVVVVVVVVVVVVVVVVVLLLLVVVVVV
792	0.65056	DDDDDDDDDDDDDNNDNDNSDDDDDDDDDDDDDDDDDDDDDDDDDDDDDDDDDDDDDDDDDDDDDDDDDDDDDDDDDDDDDDDDDDDDDDDNDDNDDDDDD
793	0.45747	NNAAPEESSPTSPPPPPPPPEASNPPPPPPPQGANNNNNNDNEEEEEEGHGGGGGGDGGGGGGGGGGGAGGGGGGGGGGGGGGGGGGGGGGKEEEPPPPPP
794	0.45954	AATTRKRKKQQKDDDDDDDENDKQQRCCEEQQAQEEEEEEEEEEEEEEAQQQQQQQEEEEEEEEEEEEEEQQQEEEEEQEQQQQQQQQQQQDEEAEEEQEE
795	0.45913	AAAAFLLAAAGAFFFFFFFMLLLLLLLLTTTTGGGGGGGGGGGGGGGGGGGGGGGGGGGGGGGGGGGGGGGGGGGGGGGGGGGGGGGGGGGCCCCCCCTTT
796	0.2765	----------------------------FF-----------------------------------------------------------------------
797	0.59972	RRKKKRRRRRRRRRKRRRRKKRKRRKQKKKRRRRRRRRRRRRRRRRRRRRRRRRRRRRRRRRRRRRRRRRRRRRRRRRRRRRRRRRRRRRCQRRQRRRRRR
798	0.62032	VVVVVVVVVVVVVVVVVVVVVLVVVVVIVVVVVVVVVVVVVVVVVVVVVVVVVVVVVVVVVVVVVVVVVVVVVVVVVVVVVVVVVVVVVVVVVVVVVVVVV
799	0.52795	YYYYYKKLLIIIKKKKKKKYYRHHRHRRHHLIHHHHHHHHHHHHHHHHHHHHHHHHHHHHHHHHHHHHHHHHHHHHHHHHHHHHHHHHHHHRRRRIIIIII
800	0.67047	GGGGGGGGGGGGNGGGGGGGGGGGGGGGGGGGGGGGGGGGGGGGGGGGGGGGGGGGGGGGGGGGGGGGGGGGGGGGGGGGGGGGGGGGGGGGGGGGGGGGG
801	0.57237	VVTTLVVVVVVVVTTTTTTTTLVVVLLLMMVVLLMMIIIILLLLLLLLILMMMMLLLVLLLLLLLLLLLLMLLMMMMMMMVVVVMMMVLMMIIIIVVVVVV
802	0.52558	QQQQKRRKQNSDQSSTTSSTSDEEDERAEEEEEEQEDDDDDEEEEDDDEQNEEEEEEEEEEEEEEEEEEEQQQQKKKQQQQQQQEEEQEEEDTTEEEEDDD
803	0.6176	GGGGNRSGGNGAGGGGGGGGNNGGGGNNNNNNGGGAGGGGGGGGGGGGSGGGGGGGGNGGGGGGGGGGGGNSSGGGGGGGGGGGGGGGGGGSNNGGGGGGG
804	0.64317	LLLLVLLLLLLLLLLLLLLLLLLLLIIILLLLLLLLLLLLLLLLLLLLLLLLLLLLLLLVLLLLLLLLLLLLLLLLLLLLLLLLLLLLLLLLLLLLLLLLL
805	0.73609	RRRRRRRRRRRRRRRRRRRRRYRRRRRRRRRRRRRRRRRRRRRRRRRRRRRRRRRRRRRRRRRRRRRRRRRRRRRRRRRRRRRRRRRRRRRRRRRRRRRRR
806	0.71246	VVVVIVVIVVIVVVVVVVVVVVVVVIVVVVVVVVVVVVVVVVVVVVVVVVVVVVIIVVVVVVVVVVVVVVVVVVVVVVVVVVVVVVVVVVVVVVVVVVVVV
807	0.69454	IIIIVVVVVVVVVVVVVVVIVVCVACVVVVVIIVVVVVVVVVVVVVVVIVVIIIVVVVVVVVVVVVVVVVVVVVVVVVVVVVVVVVVVVVVIVVVAAAAAA
808	0.77531	DDDDDDDDDDDDDDDDDDDDDDDDDDDDDDDDDDDDDDDDDDDDDDDDDDDDDDDDDDDDDDDDDDDDDDDDDDDDDDDDDDDDDDDDDDDDDDDDDDDDD
809	0.65066	GGGGAAAAAAAAAAAAAAAIAGAAASAAAAAAAAAAAAAAAAAAAAAAAAAAAAAAAAAAAAAAAAAAAAAAAAAAAAAAAAAAAAAAAAASSSSSSSSSS
810	0.75631	SSSSSSSSSSSSSSSSSSSSSSSSSSSSSSSSSSSSSSSSSSSSSSSSSSSSSSSSSSSSSSSSSSSSSSSSSSSSSSSSSSSSSSSSSSSSSSSSSSSSS
811	0.60979	IIIIVVVISIIAVVVVVVVHVVCVVVIIVVIIILIIIIIIIIIIIIIIIIIIIIIIIIIIIIIIIIIIIIIIIIIIIIIIIIIIIIIIIIIVVVIIIIIII
812	0.56413	PPPPFMMFFFMFFIIIIIIWTLFVMMMMMMMMMFMMMMMMMMMMMMMMMMMMMMMMMMMMMMMMMMMMMMMMMMMMMMMMMMMMMMMMMMMFFFFFFFFFF
813	0.68801	PPPPPPPPPPPPPPPPPPPPPPPPPPPPPPPPPPPPPPPPPPPPPPPPPPPPPPPPPPPPPPPPPPPPPPPPPPPPPPPPPSPPPPPPPPPPPPPPPPPPP
814	0.40644	TTTTMMMFFTFMEFHSRYRKISTKSSNHRRSSVVRRIIIIIIIIIIIINLLRRRQQLQQQQQQQQQQQQQIIILLLLIIIQQQQLLLELQQTTTTRRHHHH
815	0.44325	QQQQHQQAALLLIAAVAAAEALQITLLLTTMVIIIIIIIIIIIIIIIIIIIIIIVVIIIIIIIIIIIIIIIIIIIIIIIIIIIIIIIIIIIIIIIIIVVVI
816	0.49264	MMVVIVVIIPPPPPPPPPPLMTVPVLVVTTVVAPTTTTTTTTTTTTTTIIIIIIVVIIIIIIIIIIIIIITTTIIIITTTIIIIIIIIIIIPPPPTTTTTT
817	0.41256	SSSSGSSDDPPPSAAAAAASSASGRGAANNSSTTTTTTTTTTTTTTTTTTTTTTTTTTTTTTTTTTTTTTTTTTTTTTTTTTTTTTTTTTTNNNNNNYYYY
818	0.47713	SSSSVATGGGGGLGAGGGGGCGGGGSGGGGGGGGGGGGGGGGGGGGGGGGGGGGGGGGGGGGGGGGGGGGGGGGGGGGGGGGGGGGGGGGGGGGGGGGGGG
819	0.53934	HHHHAAAQQHHHHHHHHHHPHPHQHNNNNNNNNNNNNNNNNNNNNNNNNNNNNNNNNNNNNNNNNNNNNNNNNNNNNNNNNNNNNNNNNNNNNNNNNNNNN
820	0.49012	VVVVPIIPPPPPTTTTTTTPLIPTTTTTIILLLLLLLLLLLLLLLLLLLLLLLLLLLLLLLLLLLLLLLLLLLLLLLLLLLLLLLLLLLLLLLLLLLLLLL
821	0.47205	MMMMSMLMMQIQQQQQQQQMEHAGHNNNHHNNNNNNNNNNNNNNNNNNNNNNNNNNNNNNNNNNNNNNNNNNNNNNNNNNNNNNNNNNNNNNNNNNNNNNN
822	0.48532	TTTTSAAGGSSSIELTIVVASAAAAAAASSAAAAAAAAAAAAAAAAAAAAAAAAAAAAAAAAAAAAAAAAAAAAAAAAAAAAAAAAAAAAAAAAAGGGGAA
823	0.52898	VVIITTTTTTITPPPPPPPSVAVPPAPPPPPPPPPPPPPPPPPPPPPPTTTTTTPPTTTTTTTTTTTTTTPPPTTTTPPPTTTTTTTTTTTPPPPPPPPPP
824	0.51833	FFFFTVVVVCIIIVVVVVVIVVVVSTTTVVTTTTTTTTTTTTTTTTTTTTTTTTTTTTTTTTTTTTTTTTTTTTTTTTTTTTTTTTTTTTTTTTTSSSSSS
825	0.58333	YYYYYYYYYYYYYYYYYYYYYQVVVIIILLIIIIIIIIIIIIIIIIIIIIIIIIIIIIIIIIIIIIIIIIIIIIIIIIIIIIIIIIIIIIIIIIIIIIIII
826	0.6044	AAGGMAAAAMGAAAAATTTAGAAMLMMMMMMMMMMMMMMMMMMMMMMMMMMMMMMMMMMMMMMMMMMMMMMMMMMMMMMMMMMMMMMMMMMMMMMMMMMMM
827	0.54118	MMMMLIVLLVLLIFFFFFFALIVIIIIIMMIIILLLIIIIIIIIIIIIIMIIIIMIIIIIIIIIIIIIIIIIIIIIIIMMIIIIMMMMIIIVVVVVVTTTT
828	0.64361	AAAAAAAAAAAAAAAAAAAGAAAAGSAAAAAAAAAAAAAAAAAAAAAAAAAAAAAAGGGGGGGGGGGGGGAAAAAAAAAAAAAAAAAAAAAAAAAGGGGGG
829	0.68097	LLLLEEEEEEEEEEEEEEEEEEEEEEEEEEEEEEEEEEEEEEEEEEEEEEEEEEEEEEEEEEEEEEEEEEEEEEEEEEEEEEEEEEEEEEEEEEEEEEEEE
830	0.614	KKKKKRKKKKRKRHYYHHHKVNRRKRNNKRKKKKKKKKKKKKKKKKKKKKKKKKKKKKKKKKKKKKKKKKKKKKKKKKKKKKKKKKKKKKKKRRRKKKKKK
831	0.58282	IIVVAAAIIIIIAAAAAAAAAFAAAAAAAAAAMIIIIIIIIIIIIIIIMIIIIILLIMMMMIIIMIIIMMIIIIIIIIIIIIIIIIIIIIIAAAAAAAAAA
832	0.61854	SSAAASAAAAAAASSSSSSAATAAAAAAASAAAAAAAAAAAAAAAAAAAAAVAAAAAAAAAAAAAAAAAAAAASSSSAAAAAAAAAAAAAAAAAASSAAAA
833	0.53793	DDDDDDDAADECDVAIAVVDDTDADDEEDDDDDDDDDDDDDDDDDDDDDDDDDDDDDDDDDDDDDDDDDDDDDDDDDDDDDDDDDDDDDDDDDDDDDDDDD
834	0.37303	AAAAAIMEDLSDLLLVLLLIIGLLLFIIIIIVKRRRKRRRRKKKKKKKKQQRRRVVNAAAMMMMMMMMMMKKKKKKKKKKRRRRRRRRRRRALLMHHHHHH
835	0.54352	IIIIIIIMIIIIIIIIIIIIIFILIIIIIIIIVIIIIIIIIIIIIIIIIIIIMVIIIIIIIIIIIIIIIIIIIIIIIIIIIIIIIIIIIIIIIIIIIIIII
836	0.37418	LLLLKKLMIKLSKAAAAAAKLKKTRQVMRRKKRRRHRRRRRRRRRRRRKRRRRRRRRRRRRRRRRRRRRRRRRRRRRRRRRRRRRRRRRRRLLLLLLLLLL
837	0.38185	EEDDKKAAAKAGGKKKDKAGG-GGSGRRGGGGGGGGKQKKGGGGGGGGGEGGGGGGGGGGGGGGGGGGGGGGGGGGGGGGGGGGGGGDQRRGHHGGGGGGG
838	0.31997	DDDDDDDGGGDASSSSSSSEN-VK-NKNKKQCRRRRRHHHRRRRRRRRIRRRRRRRRRRRKQQQKKKKKKRRRRRRRRRRCCCCRRRRRRRNKKNRRKKKK
839	0.28309	YYYYLCHQNNACHYYYYYYH--AA-AVLKKPPDEEEKKKKEKQQKTTQKAEAPTTTTEQQEEEEDEEEDDQQQKKKKQQQQQQQQQQQTQQTQQTTTTQQQ
840	0.27591	AAAANGP------SNNNAHG---T--DDPPAAPPAPPPPPPPPPAPPPPPAPPPPPPPPPAAAAAAAAAAPPPPPPPPPPPPPPPPPPPPPPPPLPPPPPP
841	0.2185	SSKKAF-----------------I--MVLLLLLLLLLLLLLLLLLLLLLLLLLLLLLLLLLLLLLLLLLLLLLLLLLLLLLLLLLLLLLLLLLLELLLLLL
842	0.20831	MMSSYG-----------------G--AEDDWGPPAAEEEEAEAAAAAAPPPPPPAAPAPPPPSPPPPPPPPPPPPPPPPPAAAAPPPPPPPSPPQAAPAAA
843	0.21745	QQAA-R-----------------A--SAPPDDPRRRRRRRRRRRRRRRARRRRRRRRKRRRRRRRRRRRRRRRRRRRRRRKKKKRRRRRRRPPPSRRRRRR
844	0.18191	-----R-----------------S--LLEQKEAAVVSSSSAAVVVVVVSSSSSSSSSSSSSSSSSSSSSSSSSSSSSSSSSSSSSSSSSSSSQQNSSSSSS
845	0.16729	#NAME?
846	0.19363	-----R-----------------A--AAIIVVVVTTAAAAVVVVVVVVAAAAAAAAAAAAAAAAAAAAAAAAAAAAAAAAAAAAAAAAAAAASSTQQQQQQ
847	0.16909	#NAME?
848	0.19511	#NAME?
849	0.21133	#NAME?
850	0.17099	#NAME?
851	0.17396	#NAME?
852	0.17036	#NAME?
853	0.12494	#NAME?
854	0.12233	#NAME?
855	0.13098	#NAME?
856	0.11492	#NAME?
857	0.11184	#NAME?
858	0.09525	#NAME?
859	0.07935	#NAME?
860	0.07371	--------------------------LATT--ASEEKKKKAAAAAAAA------DGPP--KKKKKKKKKKPPPAPPPPPAPPPPPPPP-PPNTTM------
861	0.05914	---------------------------MIV----SSPPPPKKKKKKKK--------LL--M---M---M-LLLLMMMLMMVVVVVVVQ-LLGGGR------
862	0.06419	---------------------------IKK----AAAAAAAAAAAAAA--------RR--S---S---S-RRRRRRRRRRRRRRRRRR-KKAEEP------
863	0.0572	---------------------------A------TTRRRRVVVVVVVV--------P---R---R---R-EEEEEEEEDDHHHHAAAA-PPAPPP------
864	0.04971	---------------------------V------VVAAAARRRRRRRR------------D---D---D-IIIVVVVVVVSSSS---V-AAQMMK------
865	0.04853	---------------------------C--------PPPPQQQQQQQQ------------L---V---V-SSSKKKKGTSLLLL---S-SSRRRR------
866	0.05061	---------------------------M--------AAAAPPPPPPPP------------N---N---N-HHHQQQQPPAPPPP---A---P--D------
867	0.03711	------------------------------------AVVVEEEEEEEE----------------------QQQAAGGTAVVVVV---A---M--L------
868	0.03783	------------------------------------VVVVTTTTTTTT----------------------AAA----AAATTTT-------F--S------
869	0.03327	----------------------------------------AVVVVVVV-----------------------------QQQSSSS-------H--S------
870	0.02529	--------------------------------------------------------------------------------YYYY-------Q--I------
871	0.02317	--------------------------------------------------------------------------------PPPP-------Q--S------
872	0.01616	-------------------------------------------------------------------------------------------R--S------
873	0.01587	-------------------------------------------------------------------------------------------K--I------
874	0.00919	----------------------------------------------------------------------------------------------A------

## Sheet: SuSPect Score
SuSPect Analysis of GOx (UniProt ID: P13006)
pos A C D E F G H I K L M N P Q R S T V W Y
1 25 31 39 29 25 39 33 15 33 13 5 32 28 28 33 32 27 20 31 28
2 10 15 12 6 13 34 10 15 8 13 8 9 11 2 6 11 10 9 14 10
3 10 15 26 20 15 40 25 12 25 14 13 12 12 23 26 7 2 13 22 20
4 18 20 44 29 11 64 36 7 44 2 6 34 20 33 35 26 23 8 26 22
5 28 27 58 39 8 74 40 10 56 2 8 51 33 47 47 39 30 13 34 25
6 12 22 47 35 22 56 43 5 37 6 9 42 22 34 53 23 17 2 37 21
7 17 39 46 38 40 54 50 46 56 36 39 38 30 43 61 6 29 40 60 54
8 8 16 22 16 19 31 22 22 23 16 15 14 15 14 25 3 7 22 28 26
9 38 22 76 67 25 79 67 16 74 6 17 68 50 60 57 58 41 21 42 49
10 13 16 54 42 13 66 48 6 53 6 14 47 22 46 55 27 19 2 42 29
11 13 13 45 41 17 63 41 6 52 6 12 48 16 34 60 34 22 2 30 28
12 6 19 21 20 18 23 26 19 31 21 18 13 13 24 40 2 9 24 28 29
13 38 44 79 76 24 86 76 16 80 3 25 73 44 72 77 51 54 30 63 56
14 6 32 69 51 47 47 59 34 69 33 42 60 29 45 71 21 36 37 52 61
15 6 27 53 40 38 43 47 28 60 30 34 45 26 40 48 18 24 27 55 46
16 3 28 43 39 34 47 52 32 54 24 32 50 28 34 59 15 14 24 54 48
17 20 23 54 46 14 65 45 9 52 3 9 37 29 38 43 35 19 8 21 16
18 29 54 52 40 58 67 51 51 53 48 44 56 2 28 66 46 41 44 57 58
19 13 35 30 22 23 40 2 29 33 32 25 21 29 17 24 24 20 35 30 11
20 20 25 39 34 7 40 17 19 38 19 23 32 35 27 28 24 24 21 8 3
21 18 19 44 38 14 38 31 3 41 6 13 34 18 30 31 27 18 7 34 16
22 15 22 33 18 17 25 12 19 8 15 14 11 12 13 3 16 13 20 20 15
23 6 11 13 10 14 17 12 12 15 14 10 9 11 10 16 3 9 12 17 16
24 10 13 12 10 12 16 9 12 10 13 11 4 12 8 10 10 9 14 15 13
25 9 12 16 16 13 2 11 17 14 15 13 10 11 10 15 11 11 15 13 14
26 18 25 33 28 16 38 31 7 35 11 15 30 22 29 27 26 22 12 26 24
27 9 12 7 4 11 17 8 12 11 10 10 10 6 7 13 8 10 11 12 11
28 5 11 18 16 14 15 12 14 19 14 14 17 10 16 16 10 13 14 17 15
29 7 11 13 9 11 13 12 12 12 12 9 9 11 11 13 6 8 12 13 12
30 15 16 29 22 12 35 19 8 21 6 7 20 14 19 18 16 13 11 17 15
31 13 15 24 19 11 24 18 8 20 7 10 19 13 19 17 16 10 11 16 12
32 8 9 13 11 10 13 11 9 11 10 9 10 9 12 11 9 6 9 11 11
33 17 20 7 11 20 31 16 21 25 18 19 15 19 18 27 16 20 22 22 23
34 29 47 48 36 52 47 47 47 46 46 41 43 9 38 48 42 43 42 49 53
35 11 12 17 11 11 19 11 12 5 12 9 8 10 10 7 10 9 13 11 9
36 14 17 4 7 16 27 14 17 15 16 15 12 12 11 23 11 14 17 17 18
37 18 22 31 25 19 37 34 10 32 14 14 33 19 27 39 25 19 8 31 22
38 6 10 8 9 11 17 11 11 12 11 9 9 11 10 14 5 9 12 13 13
39 8 14 13 12 12 4 11 13 11 13 11 7 11 12 11 10 11 13 10 13
40 16 22 27 17 20 31 15 20 8 19 15 13 20 13 5 21 15 23 19 16
41 18 24 26 19 25 38 25 24 20 23 22 20 21 23 24 17 7 20 30 29
42 29 36 57 51 14 62 47 22 56 30 32 55 36 50 60 48 32 6 31 9
43 73 80 5 37 80 83 54 80 71 78 78 49 65 65 85 64 73 80 81 82
44 65 71 89 81 15 91 40 45 80 61 67 83 84 78 79 82 77 37 46 2
45 52 65 91 89 68 94 89 5 90 26 54 89 83 90 89 84 76 15 89 81
46 72 79 92 89 57 94 87 5 90 46 61 90 84 90 90 85 75 15 89 82
47 4 21 73 61 54 65 66 16 64 27 43 69 43 60 67 38 29 9 69 63
48 34 60 47 52 58 1 50 65 52 60 55 39 46 52 56 40 52 60 53 60
49 21 57 52 58 61 4 54 67 57 63 57 43 47 55 58 21 41 62 56 64
50 40 64 55 58 63 2 55 66 56 66 60 38 48 54 60 34 56 60 57 63
51 21 26 56 50 18 75 49 13 53 6 14 35 18 31 50 22 17 16 32 31
52 12 23 48 46 46 34 50 40 50 39 35 38 22 45 49 15 5 27 48 42
53 33 68 64 68 69 3 65 74 68 73 67 51 52 65 52 49 64 70 64 69
54 23 13 67 61 35 59 61 16 67 6 19 45 28 56 53 26 35 25 51 43
55 21 29 52 46 44 71 47 23 53 29 31 41 20 46 52 25 6 16 37 43
56 17 21 44 40 30 68 42 16 43 10 17 34 20 31 42 21 4 9 37 39
57 7 38 64 60 64 52 62 58 67 54 57 61 37 62 63 34 36 40 65 60
58 7 17 27 25 29 34 24 29 28 28 26 19 16 30 27 15 19 25 28 21
59 35 48 57 36 48 70 34 46 13 44 40 33 31 34 3 37 29 51 47 31
60 53 56 74 69 42 88 69 25 75 6 28 71 47 68 72 64 58 38 61 57
61 14 23 36 33 36 47 30 23 29 25 29 28 14 35 26 11 5 15 36 30
62 11 19 8 5 15 27 10 17 15 13 13 12 9 8 17 10 12 12 16 11
63 22 34 18 22 29 37 19 27 21 31 23 6 29 17 22 21 23 30 24 31
64 23 34 27 23 36 41 25 35 21 28 30 28 6 25 29 26 28 34 32 36
65 17 29 20 18 27 30 13 25 12 20 22 5 23 16 18 17 17 26 24 22
66 28 24 51 49 24 65 41 8 43 13 25 41 36 53 40 34 29 11 30 21
67 27 35 34 30 53 56 35 51 18 49 40 27 43 31 35 4 14 41 60 55
68 60 70 90 83 75 92 87 22 86 42 58 88 77 85 82 83 64 6 87 79
69 41 45 88 78 42 80 67 22 79 6 28 83 73 77 69 75 54 28 74 69
70 37 40 85 74 55 86 70 12 79 21 25 81 68 77 83 61 58 6 78 62
71 54 47 73 77 39 87 71 7 78 14 37 79 58 77 75 71 59 16 77 65
72 66 67 30 6 79 84 56 79 67 76 74 67 59 40 75 58 71 74 78 77
73 14 35 30 26 35 48 27 42 18 31 33 25 26 25 31 6 24 42 38 34
74 41 52 48 58 65 3 31 68 57 66 48 44 50 56 60 42 58 66 59 56
75 11 18 18 17 15 26 16 24 21 22 21 16 13 17 25 5 16 23 22 23
76 26 38 36 31 14 45 18 27 32 25 28 26 38 26 28 30 33 28 12 5
77 18 37 12 7 27 40 18 34 26 25 29 22 16 18 28 22 26 25 21 23
78 11 17 12 12 15 31 16 18 19 16 15 12 12 14 17 6 14 18 13 17
79 23 30 5 11 28 42 21 30 37 24 26 15 20 25 37 22 27 28 27 30
80 19 25 22 22 21 35 18 22 12 22 18 14 21 18 5 24 19 25 18 16
81 12 25 15 17 18 4 13 20 19 17 17 11 14 18 20 12 15 20 13 21
82 35 56 45 45 50 70 44 51 52 49 45 48 10 47 59 49 47 53 49 62
83 22 30 36 36 19 51 33 8 28 13 20 30 27 29 33 27 27 13 26 26
84 38 48 58 57 38 69 53 8 59 23 25 52 43 62 58 45 37 16 59 43
85 20 26 8 6 26 50 13 27 24 24 21 19 14 10 29 15 22 26 22 23
86 44 42 5 22 55 68 36 46 59 49 42 34 31 34 65 33 43 45 56 56
87 28 32 61 43 27 66 51 19 53 5 20 48 8 41 50 41 36 20 30 33
88 16 29 17 21 27 28 14 26 23 21 19 4 17 20 21 14 18 25 36 26
89 6 19 39 38 27 35 42 31 47 25 23 36 23 31 41 19 22 25 30 29
90 35 38 70 64 12 70 27 40 57 32 36 48 51 54 50 44 46 36 15 4
91 14 29 33 39 30 4 30 37 40 33 28 22 20 31 35 19 29 28 31 34
92 18 23 3 10 23 54 17 26 30 23 23 16 16 10 36 15 22 26 26 28
93 21 34 53 43 20 62 40 6 58 9 15 39 24 38 46 28 25 11 37 29
94 36 45 47 46 5 63 35 33 51 25 29 46 37 38 52 38 38 36 25 18
95 15 18 20 26 22 4 18 29 23 25 19 13 19 20 22 17 24 20 17 26
96 22 30 24 26 34 47 32 36 34 32 29 24 23 29 36 6 14 37 48 38
97 10 16 12 11 16 34 14 20 16 18 12 13 12 14 19 4 9 21 21 20
98 23 42 46 39 25 72 37 12 50 19 19 42 28 39 48 33 27 8 35 22
99 41 62 5 21 48 65 35 55 49 48 40 28 35 35 54 35 39 45 39 48
100 32 36 29 26 26 70 2 40 44 39 34 21 31 14 31 28 30 39 13 18
101 5 16 26 24 23 28 21 22 25 20 19 14 13 20 24 16 18 18 20 22
102 54 60 72 60 27 72 37 63 53 50 52 55 66 54 53 55 52 55 29 6
103 20 27 14 4 26 48 17 26 24 15 23 21 15 12 26 16 21 23 24 26
104 30 38 51 41 43 53 43 40 46 39 40 35 34 46 44 28 8 35 39 43
105 16 17 30 24 20 45 29 9 28 14 11 28 18 25 39 17 18 7 20 20
106 24 28 16 5 31 50 22 40 28 36 31 24 9 12 34 20 27 30 31 27
107 18 16 29 25 15 48 22 11 27 7 9 25 17 22 25 22 15 15 16 18
108 6 32 37 33 33 19 26 37 40 33 30 35 19 36 39 22 29 30 32 34
109 22 34 39 38 34 50 36 22 38 17 23 35 29 38 34 26 7 27 39 33
110 20 27 17 21 31 28 17 27 23 25 24 8 24 25 23 23 23 28 30 27
111 30 35 23 29 36 30 25 37 26 40 29 9 27 29 28 35 33 38 46 33
112 27 38 20 20 45 52 25 46 27 33 30 25 26 6 10 30 35 36 43 34
113 16 22 29 24 23 31 28 15 22 22 19 22 17 21 18 17 6 16 20 33
114 3 12 40 31 20 34 28 16 34 16 16 20 20 24 24 17 21 14 29 29
115 18 22 42 36 14 55 28 8 35 3 10 20 22 29 29 25 22 14 25 20
116 29 29 57 49 24 66 40 7 66 14 20 45 40 46 63 39 34 9 24 23
117 26 57 60 40 40 59 26 43 14 30 29 29 28 29 4 34 31 41 36 36
118 12 25 25 25 29 42 24 28 28 28 22 24 27 23 31 6 21 28 42 31
119 28 58 58 58 52 3 51 63 56 62 55 39 47 54 52 44 55 60 45 60
120 24 26 27 31 39 38 19 39 10 34 32 5 35 23 14 20 29 33 39 28
121 20 36 48 45 38 4 38 41 46 38 33 29 32 30 37 27 29 31 45 47
122 27 41 57 48 26 66 50 20 40 10 18 47 25 43 45 39 31 24 26 36
123 35 61 53 55 61 3 40 65 41 62 58 34 46 52 56 27 46 53 56 61
124 41 66 49 46 66 2 59 69 58 58 61 47 50 57 61 48 59 67 61 65
125 34 40 58 51 68 46 56 64 59 64 52 46 54 47 64 10 34 63 71 69
126 33 45 59 53 46 46 52 52 43 47 46 30 41 46 55 17 9 44 49 58
127 29 36 66 58 37 61 50 24 49 11 23 45 45 54 55 34 34 28 42 38
128 34 34 63 55 29 74 35 9 61 22 22 58 42 54 49 41 34 6 41 41
129 65 68 51 61 64 48 38 72 62 69 62 7 62 62 62 48 46 73 55 44
130 21 54 52 52 38 4 40 51 53 47 43 34 50 42 46 30 41 46 40 39
131 22 38 27 40 38 3 33 46 46 36 25 31 39 36 46 30 39 49 52 50
132 21 27 51 45 32 53 38 27 44 27 24 31 39 34 44 16 4 23 30 37
133 43 48 79 70 38 81 48 72 75 48 52 74 73 67 75 45 47 52 3 22
134 25 31 42 48 31 49 36 24 41 25 27 29 34 37 51 25 7 21 38 46
135 61 80 83 68 65 80 53 76 39 65 65 66 61 60 8 73 60 78 73 52
136 53 69 77 70 77 63 64 81 78 74 67 70 15 75 83 65 65 79 78 77
137 39 47 22 35 46 64 6 58 43 40 46 29 31 34 43 28 38 48 52 37
138 14 23 22 16 26 45 17 24 6 24 18 16 10 17 9 18 19 21 26 20
139 6 14 17 15 15 29 15 14 20 16 15 16 10 17 19 10 15 12 15 15
140 16 21 6 8 26 44 19 23 29 25 17 16 20 6 27 14 22 16 19 15
141 19 18 34 30 6 59 18 6 42 8 11 34 16 21 36 23 21 4 11 7
142 19 28 5 11 28 57 21 31 32 28 29 17 20 16 32 25 26 32 29 33
143 8 15 13 11 17 31 13 16 19 14 12 12 13 14 20 6 12 17 23 22
144 49 65 59 48 39 65 44 39 51 35 47 47 40 46 44 46 48 42 3 37
145 18 31 15 7 27 49 21 29 30 30 25 23 15 15 35 16 25 25 22 30
146 11 8 18 13 14 34 13 11 13 11 11 13 10 15 16 12 6 10 10 13
147 14 16 23 19 17 40 21 11 29 12 12 24 15 22 29 20 16 8 23 16
148 26 34 36 35 8 35 28 23 41 18 23 32 37 35 38 27 27 23 21 15
149 20 17 25 26 20 4 27 24 28 22 30 19 21 27 26 23 30 27 15 19
150 36 24 27 42 39 46 29 38 40 28 27 7 35 39 42 31 36 32 40 35
151 19 18 10 7 16 47 16 18 26 16 22 18 12 14 30 17 15 14 15 14
152 21 26 25 31 26 5 24 33 38 21 36 23 29 27 30 22 28 26 17 25
153 63 78 70 69 56 80 58 69 66 49 62 62 57 58 72 67 70 55 2 35
154 18 21 22 24 29 34 13 31 17 26 24 7 34 15 25 8 21 29 35 24
155 35 31 43 40 14 47 26 47 43 38 34 43 26 35 37 35 39 51 1 13
156 13 20 2 6 21 27 12 21 20 16 19 11 12 9 24 9 15 18 23 23
157 10 19 9 11 22 16 8 23 13 19 15 2 10 11 13 6 12 21 26 20
158 16 11 28 30 15 53 23 7 32 8 8 28 12 20 35 19 16 3 15 14
159 4 14 28 20 14 38 21 17 20 11 17 24 14 17 25 16 22 17 17 20
160 3 13 12 7 19 22 9 14 13 13 13 12 3 10 13 9 13 11 19 14
161 29 37 55 50 17 66 25 36 38 28 36 45 52 49 47 39 47 33 18 3
162 12 11 17 16 11 38 17 16 24 16 8 16 11 16 26 3 12 22 20 11
163 19 12 15 22 15 63 19 12 15 5 9 20 12 18 19 18 17 14 16 18
164 14 26 16 10 23 53 13 24 8 18 13 19 12 5 13 16 20 21 14 18
165 8 26 48 48 30 59 39 21 54 26 30 38 26 44 53 17 30 21 45 41
166 51 54 42 7 50 81 44 58 65 53 59 53 43 36 66 44 52 52 47 60
167 19 25 35 29 24 53 16 26 14 26 19 16 25 23 5 25 17 25 24 21
168 7 13 28 22 15 40 21 20 34 17 15 21 12 22 28 18 21 18 18 17
169 25 27 43 27 26 45 19 26 17 23 20 21 31 21 8 28 20 29 27 24
170 10 16 17 22 23 21 20 20 28 20 20 22 12 21 26 17 20 18 24 23
171 49 55 50 44 59 65 56 55 56 54 52 54 12 47 58 55 52 56 67 62
172 19 24 19 21 24 30 18 25 23 24 21 7 21 20 22 17 14 25 27 23
173 9 18 19 17 18 20 20 17 23 17 16 18 10 18 23 13 14 17 19 18
174 12 15 18 15 16 28 13 15 8 17 13 13 15 14 10 15 13 16 14 14
175 16 18 14 12 21 45 14 23 20 18 15 18 16 9 19 18 19 18 15 17
176 12 16 21 19 12 32 18 6 22 9 12 19 14 19 21 15 14 8 20 17
177 6 11 15 14 16 18 15 14 16 13 13 14 8 15 17 12 11 13 15 16
178 6 10 16 15 15 14 12 15 14 13 14 17 9 13 18 9 14 13 15 15
179 10 16 14 19 18 2 14 22 17 17 17 10 10 15 17 10 17 19 14 17
180 16 21 17 16 20 26 3 23 21 21 22 16 13 14 19 13 22 20 23 14
181 16 18 24 22 9 26 11 18 16 13 19 21 13 15 17 16 15 16 11 4
182 23 27 38 39 5 26 24 21 39 17 24 37 25 29 31 19 29 18 14 10
183 18 23 8 18 28 20 15 25 17 20 26 4 15 15 20 12 18 23 30 25
184 6 14 18 19 24 14 19 21 21 19 19 19 6 16 21 10 15 17 25 21
185 10 12 11 11 16 21 14 19 17 15 14 13 8 12 21 4 10 17 15 19
186 17 2 27 29 22 42 23 21 29 17 19 27 26 25 29 20 22 18 19 23
187 41 55 40 35 43 46 3 61 44 46 47 25 25 33 29 29 46 48 36 27
188 12 20 22 24 22 1 15 26 14 18 19 14 15 16 25 9 16 23 16 18
189 20 24 29 26 17 45 25 12 28 20 17 27 20 28 30 24 14 9 22 23
190 19 18 17 17 19 27 16 19 16 18 19 10 21 20 20 17 19 19 17 17
191 37 64 45 42 55 4 47 63 47 59 48 36 36 41 44 35 44 56 42 48
192 20 25 31 28 28 42 36 26 19 25 24 24 13 32 27 22 10 23 27 28
193 31 41 60 48 43 58 55 16 52 17 19 65 41 48 55 42 34 11 38 39
194 30 35 37 26 30 54 4 42 25 35 29 26 31 18 26 28 35 37 29 21
195 7 20 37 31 28 39 29 22 35 25 23 34 22 35 35 17 24 14 27 34
196 17 27 30 25 24 5 24 27 22 26 21 20 23 26 22 15 20 27 22 26
197 28 44 41 38 42 60 38 43 41 40 39 45 14 40 45 43 46 43 40 39
198 25 32 48 33 26 37 25 29 17 26 22 25 27 26 10 30 25 32 25 24
199 19 22 9 12 21 36 18 23 28 20 19 19 19 18 27 17 22 22 18 23
200 21 27 32 31 24 44 26 25 29 23 24 20 20 30 20 22 10 23 24 20
201 13 22 24 23 22 6 21 24 18 21 19 16 14 20 21 14 22 21 19 22
202 19 20 8 12 19 40 20 25 31 21 20 18 14 16 30 19 23 22 20 19
203 18 24 7 10 21 38 19 24 31 21 21 18 14 17 32 17 23 23 18 21
204 23 31 33 28 14 47 17 24 31 21 22 27 25 23 24 26 24 24 12 7
205 19 25 27 22 28 39 21 34 37 28 27 20 26 23 39 11 19 32 27 29
206 45 59 54 45 61 76 56 61 59 55 59 61 9 49 62 49 48 54 57 66
207 19 27 34 41 18 55 36 7 55 8 17 44 24 31 50 25 25 10 29 29
208 17 20 29 30 24 52 33 11 45 15 15 31 16 26 38 18 17 4 32 31
209 14 15 17 14 21 34 14 21 5 19 17 14 9 10 7 11 15 16 17 18
210 5 20 33 40 32 40 36 28 39 26 33 34 12 28 36 17 24 22 34 32
211 32 28 62 44 12 71 34 13 68 6 16 41 28 40 58 32 29 18 16 34
212 15 17 37 31 19 43 24 10 27 8 5 25 12 19 26 17 22 9 20 24
213 6 14 9 6 19 24 11 16 13 15 13 8 6 9 15 4 11 16 20 23
214 5 23 61 51 46 50 56 47 60 39 52 49 31 61 59 30 22 40 50 46
215 13 14 45 40 18 50 37 11 61 15 15 48 27 44 55 31 23 7 22 29
216 13 15 11 5 20 41 15 18 18 17 17 12 11 10 20 11 18 15 16 21
217 8 14 5 6 16 40 13 17 25 16 14 12 12 12 26 9 15 17 13 19
218 23 26 44 25 27 58 21 27 16 14 18 21 25 21 5 26 24 30 24 28
219 16 27 20 14 22 5 16 25 18 21 20 14 15 17 21 18 20 26 16 25
220 19 21 33 23 21 40 22 14 35 18 16 32 23 24 30 26 21 10 21 21
221 36 47 43 34 52 64 35 48 44 46 41 42 12 40 47 44 43 43 48 52
222 19 24 32 26 23 46 23 22 27 22 22 19 18 26 24 22 8 17 21 24
223 23 27 37 28 28 48 23 26 9 27 24 17 26 20 18 25 22 26 30 24
224 21 24 28 23 27 42 20 25 9 25 22 18 19 17 14 23 22 26 24 24
225 56 64 12 37 69 68 61 72 77 61 66 51 53 49 70 54 62 68 75 64
226 23 24 31 25 13 39 22 23 31 19 20 25 20 23 26 22 23 24 17 18
227 18 22 28 32 30 6 28 34 31 21 28 11 25 25 31 21 28 31 27 31
228 18 6 29 33 32 33 39 34 47 29 30 31 30 33 33 21 28 29 37 31
229 21 32 29 29 34 6 25 41 33 36 33 26 24 29 27 27 32 35 42 34
230 37 40 8 21 47 64 22 47 48 42 45 29 33 28 50 30 38 43 46 50
231 49 68 67 58 67 78 57 66 65 63 52 64 12 48 70 57 57 64 74 72
232 32 34 33 28 30 60 5 38 36 36 30 25 33 27 24 30 27 38 28 22
233 32 34 51 54 54 4 44 59 50 57 50 40 43 43 40 33 42 57 43 43
234 25 31 73 59 29 63 55 17 64 24 29 70 46 55 68 47 32 8 50 37
235 19 27 40 34 31 35 39 45 42 42 25 31 49 35 52 8 26 43 41 41
236 27 23 53 45 20 53 36 15 38 13 4 41 28 27 31 32 32 16 22 24
237 29 29 50 59 5 52 32 18 53 26 24 41 42 44 45 31 34 29 20 15
238 62 69 68 67 83 84 66 77 77 62 53 74 13 54 84 68 63 73 79 78
239 24 25 30 30 30 36 19 34 31 27 24 8 35 27 24 18 24 31 36 33
240 41 48 65 70 52 65 60 61 62 54 46 29 51 56 60 40 7 51 51 55
241 33 34 54 58 28 64 45 13 57 6 16 45 39 41 43 47 34 13 37 33
242 42 34 19 39 41 60 6 57 49 50 53 26 45 37 36 34 32 49 44 30
243 20 23 17 11 28 39 17 28 24 27 23 18 13 17 25 18 24 25 26 29
244 24 27 7 16 27 40 22 29 30 30 24 13 23 22 37 22 26 28 26 30
245 24 31 21 18 39 34 18 43 27 31 21 23 26 9 26 22 27 33 21 23
246 21 22 39 27 21 44 25 11 33 18 14 30 20 27 36 26 20 10 22 23
247 74 83 85 70 79 83 57 79 35 65 67 54 79 53 8 70 60 81 64 71
248 29 32 42 38 43 59 38 46 54 45 39 39 49 32 43 7 34 31 35 46
249 51 55 7 35 54 65 39 68 68 74 55 34 51 53 71 21 43 66 76 54
250 11 42 58 63 49 48 52 55 75 47 44 55 28 60 71 23 31 45 72 49
251 10 26 54 50 51 53 59 60 56 45 55 51 35 50 51 31 50 43 54 49
252 29 30 45 36 36 59 25 38 20 29 27 25 36 30 9 32 24 35 45 27
253 7 17 13 7 25 40 13 23 30 21 22 20 17 16 34 11 16 19 25 19
254 30 37 41 46 17 53 26 47 53 27 39 51 31 54 53 42 39 41 3 10
255 54 47 65 64 42 70 43 29 70 11 34 63 44 62 65 51 47 39 40 38
256 19 21 26 28 20 55 23 15 26 9 13 30 16 25 27 20 23 17 19 23
257 38 56 40 37 53 70 41 47 50 44 41 50 8 42 52 43 48 41 50 53
258 16 14 17 16 16 35 11 14 18 16 15 5 17 16 18 11 15 20 16 15
259 15 22 38 23 12 49 16 18 24 12 17 24 23 18 19 22 22 19 12 5
260 12 19 11 10 18 38 11 20 14 15 13 12 14 7 14 13 18 19 15 14
261 49 40 46 54 62 64 38 63 34 53 50 41 46 44 8 49 45 67 57 55
262 31 43 27 31 49 62 32 41 39 44 34 39 8 32 45 34 34 39 44 50
263 48 63 42 34 64 46 35 68 40 55 62 7 50 53 40 49 45 67 67 61
264 54 57 84 84 45 92 77 37 86 9 46 85 70 79 84 77 75 41 57 57
265 16 29 17 5 21 54 10 24 10 23 16 20 31 2 15 17 15 20 28 19
266 37 45 86 78 44 89 83 7 80 23 31 80 63 75 84 77 46 3 71 66
267 34 44 81 58 24 82 70 13 59 4 12 75 67 51 45 52 43 21 37 39
268 25 22 53 44 33 62 48 25 42 20 30 40 34 41 44 26 3 18 54 39
269 7 17 22 22 17 2 13 27 17 20 20 14 21 22 23 8 21 24 13 19
270 13 25 34 16 49 65 13 42 36 31 29 30 29 4 26 14 19 26 30 34
271 18 30 42 28 6 64 9 18 20 8 10 34 30 17 16 26 20 15 10 1
272 28 62 90 88 77 83 91 27 84 44 51 92 77 88 79 83 65 4 87 82
273 6 17 15 17 26 1 13 22 15 17 17 11 21 15 14 7 10 15 15 30
274 36 62 65 42 65 51 46 53 3 52 56 35 62 33 9 35 44 60 48 49
275 54 66 85 77 47 88 85 9 71 17 39 83 68 63 82 80 55 5 81 66
276 30 28 60 45 27 75 31 11 50 4 16 42 56 44 40 54 31 14 35 48
277 28 37 72 51 9 74 46 13 62 3 14 63 34 54 42 43 31 17 26 32
278 12 16 14 13 27 35 18 21 15 22 16 15 20 18 22 6 15 22 31 31
279 11 15 10 7 13 23 10 13 11 12 9 10 10 7 13 10 11 13 10 11
280 11 14 12 11 13 21 10 13 11 14 13 6 13 11 12 12 9 14 13 13
281 11 17 18 17 18 4 15 19 13 18 16 12 14 16 14 15 15 18 17 18
282 13 18 21 18 19 24 20 18 17 17 17 16 18 18 17 12 6 17 17 21
283 16 22 30 19 27 19 29 20 22 22 22 22 22 24 21 19 5 19 25 29
284 20 46 37 29 35 45 37 37 34 30 30 43 4 34 41 33 32 28 38 42
285 40 59 67 45 50 66 37 45 15 41 37 42 59 25 3 49 34 44 57 43
286 7 41 71 69 54 46 70 46 63 56 71 77 43 73 70 45 48 36 83 70
287 25 36 63 48 34 70 49 14 44 25 27 57 45 51 55 47 30 6 56 43
288 22 49 45 41 48 3 35 46 49 40 37 53 47 49 34 33 38 36 41 54
289 34 54 76 64 41 66 66 23 69 33 38 71 50 63 70 57 54 7 64 43
290 39 65 32 4 63 73 38 50 45 47 47 31 52 25 41 43 37 39 63 63
291 51 45 64 69 4 79 47 27 63 27 39 73 69 58 57 61 50 27 30 11
292 6 24 22 19 17 1 19 17 16 17 15 13 21 17 14 12 13 14 16 20
293 18 30 28 34 35 44 37 23 31 23 28 22 24 34 25 18 5 15 35 36
294 15 24 20 17 20 33 6 22 16 19 21 13 18 15 14 17 19 21 26 18
295 11 14 15 13 12 21 11 13 6 14 11 8 15 12 8 12 11 16 11 12
296 14 24 22 19 23 4 18 24 15 23 20 14 17 21 18 18 16 24 24 21
297 12 23 16 10 16 22 11 15 10 15 12 3 16 9 10 12 10 9 17 17
298 10 18 29 15 18 38 23 12 12 14 12 13 16 17 14 14 2 11 23 24
299 40 45 47 24 16 66 1 39 34 40 44 31 44 27 22 35 37 40 25 13
300 11 19 9 9 13 23 6 12 9 13 13 1 18 9 6 9 6 12 24 14
301 22 44 81 53 38 88 74 13 75 25 31 79 59 70 77 61 39 5 70 51
302 14 29 39 23 4 45 10 15 19 12 16 26 35 19 19 25 20 13 8 2
303 6 10 43 33 33 35 35 23 37 29 31 31 18 34 37 18 21 22 34 34
304 22 22 34 28 35 42 26 30 9 33 28 20 27 25 11 25 24 33 28 31
305 19 19 21 18 28 36 6 31 12 30 24 16 18 15 15 18 22 30 31 18
306 46 52 29 5 56 66 44 66 51 48 58 45 45 28 49 51 54 58 69 60
307 46 67 88 80 63 91 86 20 83 48 51 87 67 82 83 80 66 6 84 73
308 37 44 83 75 38 89 75 9 75 5 23 77 65 71 70 64 56 14 57 61
309 46 71 91 86 56 93 86 23 86 5 26 87 79 78 80 70 71 25 73 70
310 6 26 70 73 76 71 80 70 78 64 70 75 46 75 80 22 39 59 84 80
311 9 41 77 74 76 51 74 69 80 64 57 72 62 72 78 40 55 67 81 76
312 30 34 42 49 48 1 37 61 50 59 53 30 36 47 53 25 44 53 37 45
313 21 47 48 50 58 53 56 50 62 58 48 44 40 37 64 10 27 46 68 62
314 8 21 45 36 25 50 38 18 47 21 24 46 26 30 50 28 15 19 28 27
315 17 20 32 26 23 44 28 8 36 18 17 25 22 23 38 24 22 4 24 31
316 43 54 42 52 67 70 52 64 59 65 58 30 43 55 66 8 23 65 69 65
317 58 82 78 76 89 94 78 82 85 84 81 82 5 74 83 74 74 72 80 87
318 13 22 32 28 25 47 18 21 21 10 17 20 12 14 16 14 3 16 17 29
319 47 53 71 68 41 86 62 6 66 12 27 63 45 65 67 52 37 16 66 51
320 58 64 78 74 53 87 74 32 80 6 25 67 43 53 77 68 64 49 56 58
321 22 41 16 5 34 67 22 27 30 21 17 27 16 10 37 22 30 31 28 31
322 15 18 40 29 12 49 11 17 22 11 15 18 27 19 17 19 19 18 7 4
323 34 49 48 36 58 71 59 67 58 61 49 39 43 44 71 7 45 62 68 60
324 12 17 18 19 20 4 14 23 18 24 18 11 11 16 14 12 17 21 20 22
325 15 16 23 21 12 38 20 6 22 10 13 19 11 20 21 16 11 9 23 16
326 18 32 31 31 38 3 28 42 31 41 34 23 18 30 32 18 29 27 36 37
327 15 19 16 20 24 31 15 21 18 8 4 12 5 14 17 14 20 19 26 19
328 22 30 37 21 35 48 21 29 6 28 23 21 20 17 12 19 21 28 36 27
329 8 12 9 9 15 26 10 15 14 14 11 10 10 11 18 5 9 12 15 14
330 21 30 24 24 18 60 18 4 34 9 16 25 17 21 31 23 20 7 17 20
331 57 54 75 71 56 81 67 36 71 8 34 53 50 59 70 58 63 41 59 57
332 14 22 6 3 24 41 14 26 17 20 21 13 10 10 21 11 16 23 23 25
333 9 20 15 12 23 36 17 19 16 17 13 17 4 9 18 14 16 17 23 23
334 16 29 50 46 20 58 24 18 42 4 18 30 31 31 40 30 30 21 35 26
335 13 23 17 16 19 2 13 23 13 21 19 6 11 16 14 13 17 18 20 21
336 46 63 64 50 55 79 57 4 67 35 37 59 53 62 65 53 55 16 62 42
337 24 38 3 9 33 52 23 40 32 38 33 20 13 20 40 18 17 30 40 41
338 23 28 49 36 43 69 25 26 40 26 28 23 22 17 49 20 3 15 44 48
339 30 44 68 48 38 82 46 12 36 12 26 66 45 51 48 55 30 3 42 55
340 16 24 49 30 23 66 25 7 35 8 13 36 31 27 41 25 20 2 45 25
341 40 66 5 16 61 67 31 56 58 53 62 25 42 37 74 37 50 64 68 68
342 45 57 60 59 59 83 58 38 75 10 33 54 54 58 58 51 54 43 61 65
343 39 64 44 41 53 61 42 61 46 50 50 44 8 38 49 47 46 58 63 61
344 16 27 30 27 23 50 32 11 34 15 15 19 16 29 39 27 20 7 32 25
345 28 59 36 48 60 3 51 63 51 61 55 43 35 52 44 27 45 59 53 57
346 14 15 23 17 15 39 18 8 17 4 9 18 15 14 16 15 16 13 17 11
347 50 55 38 46 55 44 27 62 39 60 49 6 50 38 32 36 36 48 54 46
348 49 51 72 68 34 87 64 33 74 5 15 73 58 68 56 62 47 36 54 38
349 44 48 45 27 48 65 27 49 36 46 24 39 40 6 38 36 40 51 37 37
350 42 44 5 19 59 75 36 60 62 61 53 32 43 42 68 35 40 61 66 61
351 40 55 36 25 48 55 12 51 25 36 25 26 34 6 28 35 32 38 50 38
352 16 19 36 25 21 39 24 18 25 17 18 20 15 23 28 17 5 17 33 22
353 12 15 25 20 17 31 23 14 22 14 12 16 18 21 22 12 4 13 19 20
354 4 20 40 32 26 36 32 22 37 21 24 35 22 32 44 18 13 19 42 31
355 18 20 37 31 24 36 30 22 31 21 20 23 24 31 28 14 5 19 23 27
356 30 37 67 56 35 71 50 11 63 21 17 59 45 56 66 52 34 5 44 42
357 19 38 49 27 25 39 19 24 9 18 16 19 34 16 2 17 18 21 26 22
358 6 14 19 16 10 22 15 17 20 14 11 12 19 16 27 5 8 15 13 13
359 32 44 62 37 36 57 31 40 14 31 29 31 46 29 6 42 36 43 42 35
360 17 29 55 53 24 64 47 5 51 14 22 49 30 62 53 34 29 11 54 35
361 20 27 27 30 25 43 28 25 17 24 25 19 19 29 23 15 6 23 26 28
362 9 19 13 11 16 27 15 16 16 15 14 11 11 14 20 6 13 16 15 17
363 6 14 16 11 15 21 16 14 18 14 14 14 7 14 18 11 11 13 14 14
364 10 20 18 18 17 4 16 19 18 18 19 12 14 17 19 11 14 17 12 18
365 6 17 21 20 17 24 21 17 24 16 17 14 10 20 23 12 12 14 19 19
366 14 33 26 26 24 3 21 28 28 24 23 17 20 26 30 16 21 25 25 25
367 18 33 17 11 22 42 13 24 20 18 14 15 15 5 19 17 17 22 18 17
368 10 22 16 18 17 4 19 21 19 20 18 12 14 19 19 11 16 19 17 20
369 14 21 13 9 23 40 12 19 16 17 12 15 13 5 16 13 16 17 20 16
370 6 18 30 26 24 34 27 21 35 20 19 30 15 27 36 17 17 18 39 28
371 4 16 23 20 22 31 21 17 26 16 16 21 10 20 22 12 16 12 25 23
372 31 45 45 42 15 56 47 41 52 31 33 44 35 34 48 36 31 35 1 18
373 36 40 50 53 4 65 38 24 60 22 29 42 36 50 55 39 40 36 18 11
374 5 18 31 26 28 36 33 21 33 22 20 27 13 29 34 16 19 19 30 26
375 21 25 36 31 24 58 32 24 33 21 21 16 18 31 33 18 3 19 29 24
376 36 45 51 53 4 67 37 25 58 19 26 52 38 49 55 38 41 30 21 15
377 17 22 17 21 28 41 14 28 23 25 20 3 20 17 20 15 12 27 27 23
378 14 24 8 4 18 44 12 21 21 21 18 14 10 9 22 13 17 17 16 19
379 12 17 29 23 21 40 23 15 29 18 16 19 15 22 29 14 4 14 19 24
380 38 39 52 53 4 78 38 24 59 21 23 53 43 52 53 42 39 30 23 13
381 15 48 27 31 31 3 29 40 42 35 29 24 24 33 31 22 30 37 25 34
382 20 30 3 8 25 46 19 24 24 23 22 16 11 14 34 15 22 26 32 24
383 42 47 41 49 15 69 27 39 50 31 37 43 38 38 49 44 47 39 14 4
384 9 21 21 20 22 39 21 20 28 18 18 19 17 21 29 4 14 21 22 22
385 12 19 8 3 14 32 14 17 17 15 16 13 7 9 20 8 14 15 16 19
386 14 20 18 15 21 34 14 17 4 18 13 11 12 10 9 14 16 18 15 15
387 7 16 27 25 23 25 23 21 30 20 14 26 14 23 26 16 20 19 21 28
388 16 22 19 14 17 38 3 22 21 19 18 14 18 14 12 18 20 21 18 10
389 16 32 11 5 25 32 16 27 20 24 21 18 14 11 30 14 21 24 21 23
390 31 34 54 49 21 69 39 15 54 6 14 51 27 42 49 35 35 22 26 25
391 38 39 56 55 26 69 63 20 58 8 19 55 34 53 53 41 40 27 41 40
392 16 23 14 19 20 31 13 22 20 20 20 5 20 17 16 13 13 22 30 21
393 21 31 37 37 28 49 34 25 39 29 25 26 28 29 31 17 5 25 26 34
394 17 24 27 15 21 36 16 22 6 22 18 12 16 14 9 16 18 22 23 17
395 30 34 44 44 22 59 37 16 43 8 16 43 27 38 39 32 27 19 37 28
396 17 29 9 4 20 34 17 26 25 23 20 19 12 14 30 14 20 23 21 22
397 16 21 16 12 22 40 16 24 16 19 12 17 14 6 19 15 20 21 19 18
398 40 43 49 47 24 55 41 40 53 35 35 47 45 42 46 40 39 44 1 21
399 6 24 41 34 32 33 34 26 41 27 27 35 18 34 44 19 25 26 34 31
400 12 21 9 4 18 34 12 21 19 18 16 15 10 11 20 13 17 19 16 17
401 14 25 9 5 18 36 10 20 22 18 17 14 11 11 26 11 17 17 17 20
402 5 20 27 23 21 28 22 19 29 20 21 25 13 25 30 16 13 19 26 22
403 18 24 37 33 21 49 32 10 39 14 17 34 20 30 41 26 22 7 37 22
404 6 21 27 21 23 28 26 19 32 18 20 19 12 22 33 13 20 17 32 24
405 23 32 40 30 30 40 21 30 15 27 22 21 28 22 5 27 23 35 29 25
406 14 28 22 25 24 3 15 25 24 25 21 16 17 23 24 15 22 25 18 23
407 14 29 25 30 26 3 21 30 30 31 26 18 19 25 31 18 24 31 26 29
408 39 44 52 52 4 63 48 29 61 26 33 52 44 64 57 41 42 35 21 14
409 19 26 21 17 18 47 3 25 26 22 19 17 13 17 22 18 25 24 25 13
410 15 25 11 17 19 29 14 20 14 21 18 4 16 15 13 12 14 22 19 17
411 15 22 26 24 25 42 26 20 20 18 19 18 12 22 24 12 3 11 21 26
412 9 14 18 16 16 36 18 14 20 15 13 13 10 17 19 11 4 13 18 17
413 5 13 22 19 18 25 18 17 27 18 15 15 9 20 27 13 16 15 22 19
414 27 28 46 43 23 64 37 13 51 6 15 41 22 40 44 35 32 19 36 26
415 18 18 30 26 14 52 27 11 19 3 10 29 17 23 29 21 18 13 19 19
416 14 17 25 23 13 43 23 3 19 9 10 22 15 22 26 16 17 6 27 17
417 22 36 22 13 33 49 18 32 24 27 17 24 21 4 22 21 30 32 24 27
418 41 56 58 52 13 68 23 44 57 37 34 52 36 41 54 46 46 42 17 3
419 14 19 8 4 19 42 11 20 16 19 17 15 10 10 23 13 17 18 19 19
420 16 16 13 14 18 28 8 18 15 18 13 3 15 14 15 11 12 20 16 20
421 31 36 54 47 9 63 16 25 44 23 28 41 37 23 43 36 37 30 15 2
422 24 44 50 32 36 56 20 33 15 29 20 24 24 19 4 32 27 40 41 27
423 22 41 2 10 27 51 17 35 38 29 25 13 15 18 41 17 23 28 28 34
424 35 40 54 45 19 57 34 38 52 30 31 50 41 39 52 44 36 43 1 16
425 31 31 54 64 22 63 48 3 55 8 18 48 29 46 55 35 33 12 43 32
426 14 17 29 25 15 45 28 6 32 7 11 29 12 25 33 19 14 3 23 20
427 18 32 9 14 22 22 11 23 15 22 17 2 15 16 16 13 11 24 27 19
428 27 35 19 15 25 52 2 37 32 33 28 18 21 23 27 23 32 36 28 14
429 18 27 10 18 22 26 12 25 15 23 17 3 17 16 16 14 16 26 29 20
430 12 15 28 21 16 43 32 7 29 11 11 34 14 23 34 20 15 4 26 17
431 5 19 23 19 20 26 19 18 24 19 14 21 9 19 24 9 14 15 19 25
432 29 36 44 40 7 60 16 28 36 29 32 38 37 35 38 39 36 28 16 2
433 7 16 16 14 20 29 15 19 22 21 13 13 14 15 25 2 12 20 22 22
434 24 42 13 3 38 44 21 38 28 38 29 26 22 16 31 24 29 35 39 38
435 31 31 62 49 23 68 44 13 53 5 12 55 37 42 45 44 32 18 48 31
436 38 47 59 56 3 67 36 29 58 26 29 53 44 56 54 44 45 34 22 14
437 23 25 43 35 19 60 36 13 36 3 8 39 21 34 34 29 27 16 25 25
438 24 31 3 11 35 47 21 34 35 32 30 18 18 21 38 20 26 34 33 34
439 16 23 26 26 26 34 26 22 27 20 21 19 14 22 25 15 4 19 31 26
440 3 15 14 9 17 19 15 17 21 15 13 17 8 16 20 10 13 14 18 18
441 17 30 19 24 27 3 16 39 25 31 23 8 17 22 28 14 21 30 23 22
442 16 20 35 30 19 46 30 8 20 12 11 32 18 27 39 17 19 2 27 19
443 2 20 33 29 25 34 31 12 34 22 19 34 17 28 35 16 14 19 39 27
444 16 31 35 28 38 44 22 37 40 37 24 15 32 27 46 2 14 39 52 43
445 39 44 77 60 2 68 39 21 76 21 23 56 58 74 60 48 47 30 19 15
446 25 30 1 7 31 45 19 34 37 39 28 16 23 18 47 19 25 35 46 53
447 27 45 82 70 41 77 63 13 78 14 25 70 40 72 81 56 34 2 75 50
448 42 44 82 63 24 60 58 53 66 41 38 72 77 53 68 54 48 47 0 22
449 32 44 2 12 44 57 28 41 52 38 40 17 25 24 68 26 36 37 50 53
450 41 40 63 74 35 77 67 21 74 6 13 54 40 43 63 49 42 28 51 56
451 24 22 51 36 21 61 23 10 36 3 9 30 23 28 24 30 24 15 32 21
452 60 84 65 72 87 83 75 88 79 85 75 82 6 62 81 66 68 72 84 85
453 22 35 31 31 3 45 19 21 30 16 18 29 27 27 28 23 24 23 14 9
454 14 28 30 26 32 34 25 25 26 26 22 20 12 24 26 12 4 22 31 26
455 38 44 65 39 57 60 25 47 19 43 41 29 47 30 4 44 34 53 52 47
456 9 18 17 18 20 1 15 25 17 25 17 10 12 17 17 11 16 21 19 19
457 20 31 45 24 10 63 10 26 25 20 24 21 28 19 18 10 18 21 9 1
458 18 29 51 46 31 65 43 10 49 15 14 53 25 48 55 28 28 5 40 33
459 35 49 35 27 31 58 2 43 21 37 33 23 40 23 24 30 31 52 33 18
460 28 57 65 61 38 78 55 6 66 13 29 59 41 60 63 37 35 16 54 45
461 15 18 26 25 12 49 21 9 27 4 7 21 16 23 19 17 13 12 20 21
462 38 54 2 21 60 62 30 52 48 59 42 27 26 32 57 8 36 60 55 61
463 11 21 17 13 21 34 13 22 2 19 13 7 11 10 6 7 10 20 22 17
464 42 62 4 26 66 75 34 68 52 55 60 24 41 39 57 37 47 65 70 65
465 53 74 55 56 81 77 73 67 67 70 75 61 6 69 77 59 64 67 83 77
466 18 31 30 23 7 39 9 17 24 16 17 22 24 21 19 23 19 19 8 3
467 17 28 32 29 17 49 39 10 36 5 11 32 30 26 29 26 20 14 20 22
468 20 42 14 17 25 41 2 28 21 30 23 13 20 17 15 22 25 36 11 15
469 27 45 27 26 30 50 2 49 30 31 40 20 14 10 28 16 41 34 27 13
470 29 42 54 40 4 65 40 21 46 17 21 51 18 52 42 31 34 22 19 12
471 5 17 31 16 24 30 31 17 25 17 19 25 14 24 21 17 16 15 41 35
472 34 46 55 44 10 77 16 16 56 27 26 23 50 38 35 41 50 25 15 2
473 49 57 4 25 70 76 43 61 57 63 66 24 48 41 68 44 51 72 71 62
474 57 74 69 73 75 86 64 75 71 74 65 83 5 66 77 65 64 78 85 74
475 20 28 15 11 39 48 13 39 11 28 16 11 18 2 9 18 21 30 27 26
476 49 63 59 68 13 85 27 50 66 45 42 54 62 61 54 53 51 50 22 2
477 42 43 65 67 5 64 53 38 71 25 29 45 57 53 53 40 46 43 29 18
478 14 18 26 15 13 44 23 10 25 5 9 22 15 20 22 13 15 12 15 16
479 33 52 20 25 40 43 14 43 38 41 43 4 52 31 32 24 25 39 64 51
480 15 32 8 3 21 40 12 17 20 21 18 16 6 12 24 15 20 23 21 18
481 12 16 21 17 7 43 15 7 22 3 7 18 13 17 20 15 13 9 9 10
482 45 73 4 26 74 69 45 63 59 67 72 44 39 46 62 40 58 52 74 76
483 19 14 47 30 13 62 34 8 35 4 6 40 14 26 24 23 21 12 17 15
484 13 13 27 22 12 70 23 8 28 4 7 16 13 21 22 21 16 10 14 17
485 11 23 28 31 29 4 23 26 34 28 22 17 21 30 30 16 20 23 23 29
486 23 35 24 14 30 69 18 31 27 20 8 25 23 3 26 20 25 26 19 22
487 4 13 40 27 24 44 33 13 31 18 17 37 13 34 25 16 18 10 31 27
488 5 17 26 18 28 48 21 21 32 23 19 28 17 24 25 17 22 18 21 20
489 6 19 42 46 32 35 29 25 57 30 22 36 18 35 45 23 28 25 31 33
490 15 15 33 26 18 52 23 13 30 16 16 18 15 22 27 10 3 13 17 21
491 12 15 12 7 19 47 9 14 7 14 9 12 9 3 7 13 14 16 13 14
492 21 19 39 35 12 59 26 9 38 5 8 34 30 29 33 25 22 15 16 17
493 6 18 54 50 34 50 44 25 50 29 25 41 22 37 50 23 26 21 42 32
494 19 19 34 23 25 46 13 22 11 20 14 16 20 17 5 23 17 28 20 16
495 15 26 10 14 17 38 10 17 12 18 15 3 14 10 11 13 14 19 18 25
496 42 66 72 71 28 88 64 3 75 11 23 75 36 69 73 63 45 18 48 40
497 7 9 19 13 12 33 13 16 25 13 9 13 13 16 31 2 8 16 15 18
498 9 11 10 9 12 25 7 14 10 12 9 2 10 8 9 6 8 16 14 11
499 10 13 14 13 16 37 14 16 19 17 12 13 12 9 23 4 10 16 23 16
500 8 16 16 16 15 5 14 20 15 16 15 11 9 15 15 11 14 20 17 12
501 6 31 22 28 36 34 26 26 37 27 25 30 12 28 34 19 25 24 33 27
502 34 43 46 44 21 58 49 26 42 16 6 43 28 33 42 44 39 28 30 35
503 13 22 15 11 24 43 14 21 10 18 13 15 14 4 16 14 16 19 18 21
504 8 13 12 8 12 23 11 10 11 10 9 10 8 10 11 8 4 9 14 13
505 35 40 48 45 15 70 20 28 44 26 29 42 43 39 42 41 38 28 17 4
506 27 31 40 41 3 44 29 14 45 15 18 31 31 38 36 25 23 12 15 12
507 6 18 17 19 19 25 21 16 21 18 17 20 11 25 23 16 15 15 23 21
508 7 13 12 11 13 3 10 15 9 15 13 10 11 13 10 9 10 13 16 15
509 38 70 24 4 45 63 27 44 40 44 37 39 28 24 44 34 41 41 57 44
510 11 16 24 20 17 35 18 13 20 13 12 15 11 13 18 12 3 11 15 19
511 20 26 42 41 16 55 32 3 41 8 17 34 27 36 35 26 24 8 27 21
512 55 74 57 56 68 76 60 77 60 65 66 59 6 58 63 63 59 70 75 65
513 19 29 32 33 34 3 28 49 43 39 30 22 24 33 31 24 32 41 25 36
514 22 19 3 12 30 48 21 32 36 30 27 22 15 23 31 18 28 29 35 20
515 12 17 10 11 18 21 8 18 12 18 16 3 14 11 11 10 12 18 22 11
516 24 20 37 34 20 61 29 13 39 6 13 43 21 32 32 27 25 11 30 23
517 4 15 20 16 16 29 15 16 22 16 14 18 8 14 21 12 13 10 20 15
518 18 19 26 14 9 39 11 18 20 18 17 21 21 20 21 21 20 20 9 3
519 30 33 3 13 27 52 25 36 39 31 34 14 21 22 41 26 30 41 28 31
520 4 13 15 13 17 21 21 18 19 16 17 17 9 16 21 11 13 16 16 16
521 25 45 2 11 34 55 29 35 41 36 28 15 24 18 43 15 16 34 45 43
522 35 34 38 43 23 74 43 10 56 6 17 43 34 49 44 36 37 19 29 30
523 3 7 5 3 8 21 7 8 8 8 6 6 6 6 11 3 4 9 9 11
524 3 22 31 17 28 48 32 30 39 31 25 33 18 20 35 19 22 19 48 19
525 64 79 88 77 47 87 67 64 81 54 58 80 73 81 80 72 71 70 1 37
526 9 14 21 17 19 39 20 14 21 14 13 16 13 19 19 7 2 14 17 21
527 13 12 6 2 20 46 11 20 19 21 14 13 9 9 20 12 17 19 18 21
528 30 33 49 41 11 64 15 32 40 32 27 37 45 34 39 37 38 33 11 3
529 33 35 63 53 36 70 58 4 59 21 23 60 39 46 57 39 34 10 55 38
530 18 29 24 23 43 54 24 30 20 17 22 38 2 21 24 24 25 29 32 34
531 18 17 28 23 7 47 9 17 23 16 14 21 24 12 23 21 19 19 6 2
532 28 30 29 24 26 56 2 34 34 31 27 9 30 21 27 23 26 35 32 14
533 23 25 53 52 4 49 26 21 56 19 20 48 30 38 53 26 24 24 18 8
534 27 46 43 30 36 41 21 35 15 27 23 23 39 21 5 27 26 38 44 30
535 34 63 53 57 79 75 65 63 73 66 52 64 6 54 71 40 36 56 75 70
536 28 38 25 26 37 35 20 38 39 37 31 4 42 28 34 16 19 35 46 36
537 39 61 71 64 18 63 22 46 63 45 45 41 59 42 60 42 49 48 11 2
538 59 83 52 48 72 87 3 80 76 79 79 58 63 60 67 68 77 83 80 52
539 9 34 32 31 28 3 24 33 37 29 27 17 14 21 37 16 26 29 18 25
540 27 28 68 62 47 60 54 17 67 23 21 50 46 57 74 36 33 8 55 38
541 36 43 51 68 72 1 65 76 67 74 68 48 50 66 60 19 50 68 67 72
542 49 71 76 71 70 62 74 70 71 65 49 65 62 66 73 21 3 63 75 74
543 37 2 90 90 85 92 85 78 89 61 74 74 84 88 90 80 62 61 82 84
544 10 25 40 30 41 43 35 29 21 40 23 29 21 23 22 6 25 29 43 47
545 36 35 60 52 33 68 43 21 31 18 6 50 31 40 37 39 39 23 47 35
546 21 28 44 41 31 40 26 19 28 15 6 27 25 20 27 29 24 25 37 29
547 16 28 19 16 27 38 18 22 16 21 17 20 4 18 22 14 20 23 21 21
548 17 19 19 17 17 32 16 18 5 18 15 12 17 14 7 15 16 23 17 17
549 14 23 7 6 23 29 14 22 18 21 21 13 9 13 25 14 17 21 22 20
550 12 17 16 14 14 32 15 13 13 7 4 14 9 12 15 12 13 12 14 15
551 12 28 20 21 20 4 16 28 18 22 18 14 16 19 19 13 18 25 16 18
552 16 41 38 47 51 3 42 57 36 53 36 33 37 36 37 20 32 39 39 49
553 42 42 84 78 65 86 82 32 83 49 46 83 60 79 86 77 62 6 82 72
554 38 57 65 68 63 84 78 27 78 29 40 77 59 74 81 71 39 7 77 67
555 32 41 5 15 55 50 39 56 54 55 50 22 22 30 56 22 32 52 57 56
556 7 16 12 10 17 21 9 18 11 14 15 3 7 11 12 9 10 15 16 15
557 4 11 13 10 15 26 12 16 14 16 14 10 10 11 14 10 8 15 11 11
558 8 18 53 48 28 28 43 43 54 20 25 46 31 30 52 22 28 35 44 42
559 56 54 81 57 71 81 37 57 10 49 40 40 65 33 2 64 42 62 72 64
560 59 66 90 82 69 93 81 22 86 37 49 87 69 85 89 79 62 5 79 72
561 55 61 80 64 12 83 12 38 42 34 48 48 67 59 34 65 63 58 17 2
562 26 52 23 40 35 2 36 55 40 53 47 29 38 42 31 35 43 53 38 47
563 42 41 77 70 51 87 67 20 79 31 31 75 55 69 82 66 20 4 70 58
564 14 21 11 7 26 42 14 22 12 22 15 12 12 5 14 13 16 21 17 21
565 24 51 41 45 52 3 28 57 29 52 47 11 39 40 28 26 43 54 46 51
566 73 77 89 86 67 92 86 36 87 7 34 87 64 84 81 81 76 40 81 77
567 73 84 92 79 73 90 65 82 37 74 69 73 80 68 4 63 75 76 63 48
568 64 68 91 85 73 93 89 18 88 39 54 90 78 87 91 84 72 5 87 80
569 26 33 82 78 51 86 74 6 79 30 28 76 64 78 79 66 54 7 77 61
570 67 77 2 35 75 64 65 76 75 77 73 53 53 59 80 52 66 76 78 68
571 16 25 37 36 39 4 27 31 36 28 25 18 24 30 34 18 24 29 35 41
572 27 32 48 44 59 44 51 60 49 58 50 43 38 47 55 8 30 60 61 58
573 36 48 68 67 36 76 45 9 69 24 33 60 47 62 68 43 49 17 58 49
574 38 42 53 48 35 76 37 38 56 35 29 58 8 38 64 47 39 38 37 44
575 67 75 72 67 82 82 74 81 76 76 73 74 5 69 77 72 72 76 81 77
576 18 28 27 25 23 40 27 21 26 21 19 21 25 25 27 16 5 19 26 34
577 25 43 34 17 49 55 21 34 35 27 21 20 23 6 37 20 29 29 45 41
578 28 26 47 45 23 53 32 18 42 14 3 30 11 30 42 19 20 9 34 37
579 25 33 38 44 59 41 49 58 48 58 48 31 37 38 48 8 29 52 57 59
580 17 28 45 43 50 28 36 52 49 49 40 30 32 38 57 8 26 35 52 48
581 57 80 48 60 63 81 3 81 70 77 72 19 44 46 67 44 59 79 76 36
582 31 26 56 51 30 68 47 8 56 15 17 56 8 46 66 39 14 6 54 29
583 33 39 70 50 49 72 40 36 66 25 5 30 46 20 65 26 25 26 54 41
584 11 28 47 44 37 47 41 24 53 17 20 26 20 31 49 12 4 21 27 42
585 14 24 49 44 23 66 49 6 60 14 13 33 7 48 64 19 6 2 48 26
586 21 24 61 58 3 77 49 10 69 13 16 56 43 61 68 27 19 14 32 13
587 56 66 86 79 28 85 46 44 83 47 35 71 74 59 82 72 59 47 45 3
588 2 35 74 68 69 39 71 47 78 45 20 69 41 64 77 43 39 34 74 64
589 34 44 73 67 27 85 57 10 70 10 4 55 43 48 68 50 36 13 59 52
590 5 47 77 72 76 42 75 69 80 70 68 73 42 74 81 38 52 56 78 76
591 23 32 39 17 18 83 44 17 53 5 14 50 30 42 42 40 29 13 22 21
592 51 58 68 43 63 75 34 49 4 48 37 34 45 30 9 52 38 52 51 33
593 15 19 68 66 29 64 66 2 73 14 24 61 39 60 72 34 26 6 56 50
594 5 23 46 43 49 50 50 54 57 51 38 41 35 45 66 2 31 36 61 52
595 45 59 3 11 64 75 35 62 57 65 59 35 40 33 70 33 43 51 67 65
596 5 19 27 30 17 47 22 12 25 12 11 31 15 23 34 9 15 15 24 26
597 69 72 85 83 64 94 83 5 88 27 33 82 65 84 86 78 68 19 82 73
598 31 36 67 61 38 86 50 11 39 6 18 53 41 53 39 45 44 23 49 49
599 11 22 8 3 23 48 15 23 14 22 19 15 10 10 20 13 16 20 23 22
600 54 57 5 16 65 81 44 68 61 68 61 40 48 40 65 44 47 66 70 54
601 47 71 81 65 27 85 25 51 76 44 49 58 71 66 63 61 69 59 12 4
602 5 15 31 20 22 16 26 17 20 20 16 21 13 24 21 15 16 18 25 23
603 4 5 6 5 6 11 5 6 5 6 4 5 5 6 7 3 5 6 6 6
604 17 20 33 25 12 30 25 11 19 8 4 23 20 20 16 19 15 13 20 19
605 8 12 10 6 10 17 8 10 7 10 6 9 10 4 6 11 9 11 9 9
